# Supplementary material
Source: PubMed Central journal article supplement (PMC2721788)
Supplement: blood-2009-03-211771_1.pdf [file blood-2009-03-211771_1.pdf]

| Rack No. | Rack Position | CATNUM | CAS number | Mol. Weight Structure | Name                                                             | Secondary Name                                                                               | Class                 | Enzyme | Action     | Selectivity            | Solubility in Water | Solubility in DMSO | Reference                                                                                                                                                                                                                                  |
|----------|---------------|--------|------------|-----------------------|------------------------------------------------------------------|----------------------------------------------------------------------------------------------|-----------------------|--------|------------|------------------------|---------------------|--------------------|--------------------------------------------------------------------------------------------------------------------------------------------------------------------------------------------------------------------------------------------|
| 01       | A02           | 120693 | 658-48-0   | 195.22                | DL-alpha-Methyl-p-tyrosine                                       | 4-Hydroxy-alpha-methylphenylalanine                                                          | Neurotransmission     | Enzyme | Inhibitor  | Tyrosine hydroxylase   |                     |                    | Migliorini RH, et al. Am J Physiol. 1997 Feb;(272 (2 Pt2): R656-61                                                                                                                                                                         |
| 01       | A03           | 291552 | 20315-68-8 | 202.26                | 6-Methoxy-1,2,3,4-tetrahydro-9H-pyrido[3,4b]indole               |                                                                                              | Neurotransmission     | Enzyme | Inhibitor  | MAO                    |                     |                    | Taylor, D.L., et al., J Pharm Pharmacol., 1984 Feb.; 36:125-7.                                                                                                                                                                             |
| 01       | A04           | A 0500 | 60-35-5    | 59.07                 | Acetamide                                                        | Amide C2                                                                                     | Biochemistry          | Enzyme | Inhibitor  | Carbonic anhydrase     |                     |                    | Kennedy, G.L Jr, Crit Rev Toxicol. 2001 Mar;31(2):139-222                                                                                                                                                                                  |
| 01       | A05           | A 1260 | 665-66-7   | 187.71                | Amantadine hydrochloride                                         | Tricyclo[3.3.1.1 3,7]decan-1-amine hydrochloride                                             | Dopamine              |        | Releaser   |                        | Yes                 | 50 mg/ml           | Li, X.M., Juorio, A.V., Amantadine increases aromatic L-amino acid decarboxylase mRNA in PC12 cells J. Neurosci. Res. 4th ed.,53, 490 (1998)                                                                                               |
| 01       | A06           | A 2129 | 56-12-2    | 103.12                | GABA                                                             | gamma-Aminobutyric acid                                                                      | GABA                  |        | Agonist    |                        |                     |                    | Schwartz-Bloom, R.D., Sah, R.,J. Neurochem. 77, 353 (2001)                                                                                                                                                                                 |
| 01       | A07           | A 3539 | 59556-17-1 | 175.62                | Gabaculine hydrochloride                                         |                                                                                              | GABA                  | Enzyme | Inhibitor  | GABA transaminase      |                     |                    | Pierard, C., et al., Effects of GABA-transaminase inhibition on brain metabolism and amino-acid compartmentation: anin vivostudy by 2D 1H-NMR spectroscopy coupled with microdialysis Exp. Brain Res. 127, 321 (1999)                      |
| 01       | A08           | A 4508 | 2921-14-4  | 218.60                | O-(Carboxymethyl)hydroxylamine hemihydrochloride                 | Aminoxyacetic acid; (Carboxymethoxy)amine hemihydrochloride                                  | Biochemistry          | Enzyme | Inhibitor  | Aminotransferase       |                     |                    | Vecsei, L., et al., Eur J Pharmacol. 99 Sep 22;220(2-3):259-62                                                                                                                                                                             |
| 01       | A09           | A 5157 | 85797-13-3 | 225.18                | (±)-2-Amino-7-phosphonoheptanoic acid                            | (±)-AP-7                                                                                     | Glutamate             |        | Antagonist | NMDA                   |                     |                    | Stone., The relative potencies of (-)-2-amino-5 phosphonovaleate and (-)-2-amino-7-phosphonoheptanoate as antagonists of N-methylaspartate and quinolinic acids and repetitive spikes in rat hippocampal slices Brain Res. 381, 195 (1986) |
| 01       | A10           | A 5909 | 34118-92-8 | 313.83                | N-Acetylprocainamide hydrochloride                               | Acedainide; N-Acetylnovocainamide hydrochloride; NAPA                                        | Na+ Channel           |        | Blocker    |                        |                     |                    | Nakahara, T., et al., Eur J Pharmacol., 2001 Mar 9; 415:73-8.                                                                                                                                                                              |
| 01       | A11           | A 6671 | 13434-13-4 | 385.51                | Actinonin                                                        | 3-[[1-(2-(Hydroxymethyl)-1-pyrrolidinyl)carbonyl]-2-methylpropyl]carbamoyloctanoic acid      | Biochemistry          | Enzyme | Inhibitor  | Leucine aminopeptidase |                     |                    | Sayama, Y., et al., Effects of an antibiotic protease inhibitor, actinonin on the growth within collagen gels of non-metastatic and metastatic mouse mammary tumors of the same Cancer Lett. 94, 171 (1995)                                |
| 01       | B02           | 144509 | 91-40-7    | 213.24                | N-Phenylanthranilic acid                                         | Diphenylamine-2-carboxylic acid; DPC                                                         | Cl- Channel           |        | Blocker    |                        |                     |                    | Cho H, et al. Eur J Neurosci. 2003 June;17(12):2630-8                                                                                                                                                                                      |
| 01       | B03           | 861669 | 13153-27-0 | 434.43                | S-(4-Nitrobenzyl)-6-thioguanosine                                | 2-Amino-6-[(4-Nitrobenzyl)thio]-9-beta-D-ribofuranosylpurine                                 | Adenosine             |        | Inhibitor  |                        |                     |                    | Hammond, J.R., J Pharmacol Exp Ther. 1991 Nove; 259(2):799-807                                                                                                                                                                             |
| 01       | B04           | A 0666 | 88519-57-7 | 349.28                | N-(4-Aminobutyl)-5-chloro-2-naphthalenesulfonamide hydrochloride | W-13                                                                                         | Intracellular Calcium |        | Antagonist | Calmodulin             |                     |                    | Hidaka, H., and Tanaka, T., Naphthalenesulfonamides as calmodulin antagonists, Meth. Enzymol. 102, 185-194 (1983)                                                                                                                          |
| 01       | B05           | A 1755 | 317-34-0   | 420.43                | Aminophylline ethylenediamine                                    | Theophylline ethylenediamine                                                                 | Adenosine             |        | Antagonist | A1/A2                  | Yes                 | 3.7 mg/ml          | Thakker, et al., Analytical Profiles of Drug Substances 2nd ed., 2, 1-44 (1982)                                                                                                                                                            |
| 01       | B06           | A 2169 | 30516-87-1 | 267.25                | 3'-Azido-3'-deoxythymidine                                       | Azidothymidine; AZT                                                                          | Immune System         | Enzyme | Inhibitor  | Reverse transcriptase  | Yes                 | 50 mg/ml           | Wu, D., et al., Low blood-brain barrier permeability to azidothymidine (AZT), 3TC, and thymidine in the rat. Brain Res. 791, 313 (1998)                                                                                                    |
| 01       | B07           | A 3595 |            | 392.24                | AC 915 oxalate                                                   | N-(2-(3,4-dichlorophenyl)acetoxy)ethylpyrrolidine oxalate                                    | Opioid                |        | Ligand     | sigma1                 | Yes                 | 18 mg/ml           | Maeda, D.Y., et al., As-1 selective analogue of BD1008. A potential substitute for (+)-opioids insreceptor binding assays Bioorg. Med. Chem. Lett. 10, 17-18 (2000)                                                                        |
| 01       | B08           | A 4562 | 1214-79-5  | 294.15                | 5-(N,N-Dimethyl)amiloride hydrochloride                          | 3-Amino-N-(aminoiminoethyl)-5-(dimethylamino)-6-chloropyrazinecarboxamide hydrochloride; DMA | Ion Pump              |        | Blocker    | Na+/H+ Antiporter      |                     |                    | Arakawa, J. and Hara, A.,Pharmacol. 59, 239 (1999)                                                                                                                                                                                         |
| 01       | B09           | A 5282 | 76326-31-3 | 197.13                | (±)-2-Amino-5-phosphonopentanoic acid                            | (±)-AP-5; (±)-AP-V                                                                           | Glutamate             |        | Antagonist | NMDA                   | Yes                 | 5.6 mg/ml          | Watkins, J.C. and Evans, R.H., Excitatory amino acid transmitters Ann. Rev. Pharmacol. Toxicol. 21, 165-204 (1981)                                                                                                                         |
| 01       | B10           | T 9034 | 145-42-6   | 537.70                | Sodium Taurocholate                                              | 3alpha,7alpha,12alpha-Trihydroxy-5beta-cholan-24-oic-acid N-(2-sulfoethyl)amide              | Multi-Drug Resistance |        | Modulator  | Conjugate Pathway      | Yes                 | 0.5 M              | Aveldano, M.I., Phospholipid solubilization during detergent extraction of rhodopsin from photoreceptor disk membranes. Arch. Biochem. Biophys. 324, 331-343 (1995)                                                                        |

| Rack No. | Rack Position | CATNUM | CAS number  | Mol. Weight Structure | Name                                             | Secondary Name                                                               | Class                 | Enzyme | Action     | Selectivity               | Solubility in Water | Solubility in DMSO | Reference                                                                                                                                                                           |
|----------|---------------|--------|-------------|-----------------------|--------------------------------------------------|------------------------------------------------------------------------------|-----------------------|--------|------------|---------------------------|---------------------|--------------------|-------------------------------------------------------------------------------------------------------------------------------------------------------------------------------------|
| 01       | B11           | A 6770 | 59-05-2     | 454.45                | Methotrexate                                     | Methylaminopterin; MTX                                                       | DNA Metabolism        |        | Inhibitor  |                           | Insoluble           |                    | Kumar, P., et al., Interaction of polyglutamyl derivatives of methotrexate, 10-deazaaminopterin, and dihydrofolate with dihydrofolate reductase. Cancer Res. 46, 5020-5023 (1986)   |
| 01       | C02           | 190047 | 62284-79-1  | 373.23                | S(-)-p-Bromotetramisole oxalate                  | R 30402 oxalate                                                              | Phosphorylation       | Enzyme | Inhibitor  | Alkaline phosphatase      |                     |                    | Yingst, D.R., et al. Eur Pharmacol. 2000 Oct 6; 406(1):49-52                                                                                                                        |
| 01       | C03           | 861804 | 53464-72-5  | 432.00                | TMB-8 hydrochloride                              | 8-(Diethylamino)octyl 3,4,5-trimethoxybenzoate hydrochloride                 | Intracellular Calcium |        | Antagonist |                           |                     |                    | Petegnief, V., et al., Neurochem Int. 2004 Mar;44(4):287-91                                                                                                                         |
| 01       | C04           | A 0760 | 2133-34-8   | 101.11                | L-azetidine-2-carboxylic acid                    | (S)-Azetidine-2-carboxylic acid                                              | Biochemistry          |        | Inhibitor  | Collagen                  |                     |                    | Berggren, D., et al.,Hear. Res. 107, 125 (1997)                                                                                                                                     |
| 01       | C05           | A 1782 | 73322-71-1  | 466.48                | S-(p-Azidophenacyl)glutathione                   |                                                                              | Multi-Drug Resistance | Enzyme | Modulator  | Glutathione S-transferase |                     |                    | Seddon, A.P. and Douglas, K.T.,FEBS Lett. 110, 262 (1980)                                                                                                                           |
| 01       | C06           | A 2251 | 62-51-1     | 195.69                | Acetyl-beta-methylcholine chloride               | Methacholine chloride                                                        | Cholinergic           |        | Agonist    | M1                        | Yes                 | 50 mg/ml           | Kamatchi, G.L, et al. J Biol Chem. 2004 Feb 6;279(6):4102-9. Epub 2003 Nov 18                                                                                                       |
| 01       | C07           | A 3711 | 80809-81-0  | 326.44                | AA-861                                           | 2-(12-Hydroxydodeca-5,10-diylnyl)-3,5,6-trimethyl-p-benzoquinone             | Leukotriene           | Enzyme | Inhibitor  | 5-lipoxygenase            |                     |                    | Terao, S., et al.,J. Chem. Soc., Perkin Trans. I 1, 2909 (1982)                                                                                                                     |
| 01       | C08           | A 4638 | 446-86-6    | 277.27                | Azathioprine                                     |                                                                              | P2 Receptor           | Enzyme | Inhibitor  | Purine synthesis          |                     |                    | Fernandez, O., et al., J Neurol Sci. 2004 Aug 15;223(1):29-34                                                                                                                       |
| 01       | C09           | A 5330 | 148451-96-1 | 472.39                | L-732,138                                        | N-Acetyl-L-tryptophan 3,5-bis(trifluoromethyl)benzyl ester                   | Tachykinin            |        | Antagonist | NK1 > NK2, NK3            |                     |                    | MacLeod, A. M., N-acyl-L-tryptophan benzyl esters: potent substance P receptor antagonists. J. Med. Chem. 36, 2044 (1993)                                                           |
| 01       | C10           | A 5922 | 20537-88-6  | 214.22                | Amifostine                                       | 2-(3-Aminopropyl)aminoethyl phosphorothioate; WR2721                         | Cell Stress           |        | Inhibitor  | Cytoprotectant            |                     |                    | Capizzi, R.L., et al.,Cancer 72, 3495 (1993)                                                                                                                                        |
| 01       | C11           | A 6883 | 2870-71-5   | 384.32                | Atropine methyl bromide                          |                                                                              | Cholinergic           |        | Antagonist | Muscarinic                | Yes                 | 50 mg/ml           | Ohnuma, H., et al., Intracerebroventricular injection of methylatropine suppresses insulin response to oral glucose load in rats. J. Auton. Nerv. Syst. 57, 43-48 (1996)            |
| 01       | D02           | 194336 | 627-95-2    | 153.61                | 5-Aminovaleric acid hydrochloride                | 5-Aminopentanoic acid hydrochloride                                          | GABA                  |        | Antagonist | GABA-B                    |                     |                    | Lastres-Becker, I., J Neurochem. 2003 Mar;84(5):1097-109                                                                                                                            |
| 01       | D03           | A 0152 | 504-24-5    | 94.12                 | 4-Aminopyridine                                  |                                                                              | K+ Channel            |        | Blocker    | A-type                    |                     |                    | Armand, V., et al.,Brain Res. 841, 62 (1999)                                                                                                                                        |
| 01       | D04           | A 0779 | 66711-21-5  | 281.57                | p-Aminoclonidine hydrochloride                   | Apraclonidine hydrochloride                                                  | Adrenoceptor          |        | Agonist    | alpha2                    |                     |                    | Alburges, M.E.,a2-agonist binding sites in brain: [125I]p-iodoclonidine versus [3H]para-aminoclonidine Brain Res. Bull. 32, 97 (1993)                                               |
| 01       | D05           | A 1784 | 54-62-6     | 440.42                | Aminopterin                                      | 4-Aminofolic acid                                                            | Antibiotic            | Enzyme | Inhibitor  | Dihydrofolate reductase   |                     |                    | Matherly, L.H., et al., Enhanced polyglutamylation of aminopterin relative to methotrexate in the Ehrlich ascites tumor cellin vitro. Cancer Res. 45, 1073 (1985)                   |
| 01       | D06           | A 2385 | 320-67-2    | 244.21                | 5-azacytidine                                    | 4-Amino-1-(beta-D-ribofuranosyl)-1,3,5-triazin-2(1H)-one; Ladakamycin        | DNA Metabolism        | Enzyme | Inhibitor  | DNA methyltransferase     |                     |                    | Qian X., et al., DNA methylation regulates p27kip1 expression in rodent pituitary cell lines. Am. J. Pathol. 153, 1475-1482 (1998)                                                  |
| 01       | D07           | A 3773 | 1684-40-8   | 234.73                | 9-Amino-1,2,3,4-tetrahydroacridine hydrochloride | Tacrine hydrochloride; THA hydrochloride                                     | Cholinergic           | Enzyme | Inhibitor  | Cholinesterase            |                     |                    | Sussman, J., et al.,Proc. Natl. Acad. Sci. USA 90, 9031 (1993)                                                                                                                      |
| 01       | D08           | A 4669 | 59277-89-3  | 225.21                | Acyclovir                                        | Acycloguanosine                                                              | Immune System         | Enzyme | Inhibitor  | Viral DNA synthesis       | Yes                 | 0.7 mg/ml          | Ochiai, H., et al., Murine cytomegalovirus DNA polymerase: purification, characterization and role in the antiviral activity of acyclovir. Antiviral Res. 17, 1-16 (1992)           |
| 01       | D09           | A 5376 | 50-78-2     | 180.16                | Acetylsalicylic acid                             | O-Acetylsalicylic acid; Aspirin                                              | Prostaglandin         | Enzyme | Inhibitor  | COX-3 > COX-1 > COX-2     | Yes                 | 3.0 mg/ml          | Gilroy, D. W., Differential effects of inhibition of isoforms of cyclooxygenase (COX-1 and COX-2) in chronic inflammation. Inflamm. Res. 47, 79 (1998)                              |
| 01       | D10           | A 6011 | 59-66-5     | 222.25                | Acetazolamide                                    | N-[5-(Aminosulfonyl)-1,3,4-thiadiazol-2-yl]acetamide                         | Biochemistry          | Enzyme | Inhibitor  | Carbonic anhydrase        |                     |                    | Hauge, A., et al., Acute effects of acetazolamide on cerebral blood flow in man. Acta Physiol. Scand. 117, 233 (1983)                                                               |
| 01       | D11           | A 6976 |             | 437.96                | Amperozide hydrochloride                         | 4-[4-bis(4-Fluorophenyl)butyl]-N-ethyl-1-piperazinecarboxamide hydrochloride | Serotonin             |        | Ligand     |                           | Yes                 | 14 mg/ml           | Rausser, L., et al.,J. Pharmacol. Exp. Ther. 299, 83-89 (2001)                                                                                                                      |
| 01       | E02           | 211672 | 498-95-3    | 129.16                | (±)-Nipecotic acid                               | (±)-3-Piperidine carboxylic acid                                             | GABA                  |        | Inhibitor  | Uptake                    |                     |                    | De Marco, A., et al. Eur J Pharm Sci. 2004 Jun;22(2-3):153-64                                                                                                                       |
| 01       | E03           | A 0257 | 5908-99-6   | 676.83                | Atropine sulfate                                 |                                                                              | Cholinergic           |        | Antagonist | Muscarinic                | Yes                 | 2.5 mg/ml          | Zwart, R., and Vijverberg, H.P., Potentiation and inhibition of neuronal nicotinic receptors by atropine: competitive and noncompetitive effects Mol. Pharmacol. 52, 886-895 (1997) |

| Rack No. | Rack Position | CATNUM | CAS number  | Mol. Weight Structure | Name                             | Secondary Name                                                                                                           | Class                 | Enzyme | Action     | Selectivity              | Solubility in Water | Solubility in DMSO | Reference                                                                                                                                                                                                                                     |
|----------|---------------|--------|-------------|-----------------------|----------------------------------|--------------------------------------------------------------------------------------------------------------------------|-----------------------|--------|------------|--------------------------|---------------------|--------------------|-----------------------------------------------------------------------------------------------------------------------------------------------------------------------------------------------------------------------------------------------|
| 01       | E04           | A 0788 | 3544-24-9   | 136.15                | 3-aminobenzamide                 | 3-ABA; 3-AB                                                                                                              | Apoptosis             | Enzyme | Inhibitor  | PARS                     | Yes                 |                    | Purnell, M.R. and Whish, W.J., Novel inhibitors of poly(ADP-ribose) synthetase, Biochem. J. 185, 775-777 (1980)                                                                                                                               |
| 01       | E05           | A 1824 | 1210-83-9   | 218.26                | N-Acetyl-5-hydroxytryptamine     | N-Acetylserotonin; Normelatonin                                                                                          | Melatonin             |        | Precursor  |                          |                     |                    | Vanecek, J., and Vollrath, L., Developmental changes and daily rhythm in melatonin-induced inhibition of 3',5'-cyclic AMP accumulation in the rat pituitary Endocrinology 126, 1509-1513 (1990)                                               |
| 01       | E06           | A 3085 | 1154-25-2   | 299.77                | 5-(N-Ethyl-N-isopropyl)amiloride | EIPA                                                                                                                     | Ion Pump              |        | Blocker    | Na+/H+ Antiporter        |                     |                    | Abrahamse, S.L., et al., Am. J. Physiol. 267, G409 (1994)                                                                                                                                                                                     |
| 01       | E07           | A 3846 | 246246-19-5 | 402.51                | AL-8810                          | (5Z, 13E)-(9S, 11S, 15R)-9, 15, dihydroxy-11-fluoro-15-(2-indanyl)-16, 17, 18, 19, 20, pentanor-5, 13-prostadienoic acid | Prostaglandin         |        | Antagonist | FP Receptor              |                     |                    | Griffin, B.W., et al., Pharmacological characterization of an FP prostaglandin receptor on rat vascular smooth muscle cells (A7r5) coupled to phosphoinositide turnover and intracellular calcium mobilization. J. Pharmacol. 286, 411 (1998) |
| 01       | E08           | A 4687 | 56824-20-5  | 341.84                | Amiprilose hydrochloride         | 1,2-O-Isopropylidene-3-O-[3'-(N,N-dimethylamino)propyl]-alpha-D-glucopyranose hydrochloride                              | Immune System         |        | Modulator  |                          |                     |                    | Garrett, E.R., et al., J. Pharmacol. Sci. 71, 387 (1982)                                                                                                                                                                                      |
| 01       | E09           | A 5585 | 96861-65-3  | 299.77                | 5-(N-Methyl-N-isobutyl)amiloride | MIA                                                                                                                      | Ion Pump              |        | Blocker    | Na+/H+ Antiporter        |                     |                    | Maidorn, R.P., et al., Br. J. Cancer 67, 297 (1993)                                                                                                                                                                                           |
| 01       | E10           | A 6134 | 300-08-3    | 236.11                | Arecoline hydrobromide           | 1-Methyl-1,2,5,6-tetrahydro-3-pyridinecarboxylic acid methyl ester hydrobromide                                          | Cholinergic           |        | Agonist    |                          | Yes                 |                    | Moos, W.H., et al., Cholinergic agents: effect of methyl substitution in a series of arecoline derivatives on binding to muscarinic acetylcholine receptors. J. Pharm. Sci. 81, 1015-1019 (1992)                                              |
| 01       | E11           | A 7009 | 996-19-0    | 246.25                | Aminoguanidine hemisulfate       | Hydrazinecarboximidamide hemisulfate                                                                                     | Nitric Oxide          | Enzyme | Inhibitor  | NOS                      |                     |                    | Chang, K.C., et al., Br J Pharmacol. 2004 Jul 12 [Epub ahead of print]                                                                                                                                                                        |
| 01       | F02           | 246379 | 123-99-9    | 188.23                | Azelaic acid                     | Dicarboxylic acid C9; Nonanedic acid; AZA                                                                                | DNA Metabolism        | Enzyme | Inhibitor  |                          |                     |                    | Charnock, C., Eur J Pharm Sci. 2004 Apr;21(5):589-96                                                                                                                                                                                          |
| 01       | F03           | A 0382 | 52-88-0     | 366.42                | Atropine methyl nitrate          | AMN; Methylatropine nitrate                                                                                              | Cholinergic           |        | Antagonist | Muscarinic               | Yes                 | 50 mg/ml           | Nijssen, M.J., et al., Conditioned fear-induced tachycardia in the rat: vagal involvement Eur. J. Pharmacol. 350, 211-222 (1998)                                                                                                              |
| 01       | F04           | A 0937 | 3414-63-9   | 319.27                | (±)-Norepinephrine (+)bitartrate | (±)-Arterenal (+)bitartrate; (±)-Noradrenalin (+)bitartrate                                                              | Adrenoceptor          |        | Agonist    |                          |                     |                    | Kitayama, S., and Dohi, T., Eur J Pharmacol. 2003 Oct. 31;479(1-3):65-70                                                                                                                                                                      |
| 01       | F05           | A 1895 | 4431-00-9   | 422.35                | Aurintricarboxylic acid          | ATA                                                                                                                      | Apoptosis             | Enzyme | Inhibitor  | Topoll                   |                     |                    | Posner, A., et al., Aurintricarboxylic acid is an inhibitor of mu- and m-calpain Biochem. Mol. Biol. Int. 36, 291-299 (1995)                                                                                                                  |
| 01       | F06           | A 3134 | 2079-89-2   | 256.26                | 3-Aminopropionitrile fumarate    |                                                                                                                          | Multi-Drug Resistance | Enzyme | Substrate  | CYP450                   |                     |                    | Gilad, G.M. and Gilad, V.H., Eur J Pharmacol., 2001; 430:69-72.                                                                                                                                                                               |
| 01       | F07           | A 3940 | 1614-12-6   | 134.14                | 1-Aminobenzotriazole             | ABT; 1-Benzotriazolamine                                                                                                 | Multi-Drug Resistance | Enzyme | Inhibitor  | CYP450, chloroperoxidase |                     |                    | Ortiz de Montellano, P.R., et al., Tetrahedron Lett. 40, 511 (1984)                                                                                                                                                                           |
| 01       | F08           | S 9318 | 78934-83-5  | 465.80                | Sandoz 58-035                    | 3-[Decyldimethylsilyl]-N-[2-(4-methylphenyl)-1-phenethyl]propanamide                                                     | Lipid                 | Enzyme | Inhibitor  | ACAT                     | Insoluble           |                    | Ross, A. C., et al. Selective inhibition of acyl coenzyme A:cholesterol acyltransferase by compound 58-035. J. Biol. Chem. 259, 815-819 (1984)                                                                                                |
| 01       | F09           | A 5626 | 6050-81-3   | 197.73                | Acetylthiocholine chloride       |                                                                                                                          | Cholinergic           |        | Agonist    | Nicotinic                |                     |                    | Froede, H.C., Direct determination of acetyl-enzyme intermediate in the acetylcholinesterase-catalyzed hydrolysis of acetylcholine and acetylthiocholine. J. Biol. Chem. 259, 11010 (1984)                                                    |
| 01       | F10           | A 6351 |             | 345.47                | A-315456                         | N-[3-(cyclohexylidene(1H-imidazol-4-yl)methyl)phenyl]ethanesulfonamide                                                   | Adrenoceptor          |        | Antagonist | alpha1D                  | Insoluble           |                    | Buckner, S.A. et al., Eur. J. Pharmacol. 433, 123-127 (2001)                                                                                                                                                                                  |
| 01       | F11           | A 7127 | 2482-00-0   | 228.27                | Agmatine sulfate                 | (4-Aminobutyl)guanidine sulfate                                                                                          | Imidazoline           |        | Agonist    |                          | Yes                 | 50 mg/ml           | Li, et al., Agmatine: An endogenous clonidine-displacing substance in the brain. Science 263, 966 (1994)                                                                                                                                      |
| 01       | G02           | 246557 | 343-94-2    | 196.68                | Tryptamine hydrochloride         | 3-(2-Aminoethyl)indole hydrochloride                                                                                     | Serotonin             |        | Ligand     |                          |                     |                    | Medhurst, A.D., et al., Br J Pharmacol. 1993 Nov;110(3):1023-30                                                                                                                                                                               |
| 01       | G03           | A 0384 | 14923-17-2  | 270.31                | Arcaine sulfate                  | N,N'-1,4-Butanediybis(guanidine) sulfate                                                                                 | Glutamate             |        | Antagonist | NMDA-Polyamine           |                     |                    | Reynolds, I.J., Arcaine uncovers dual interactions of polyamines with the N-methyl-D-aspartate receptor J. Pharmacol. Exp. Ther. 255, 1001-1007 (1990)                                                                                        |
| 01       | G04           | A 0966 | 1742-95-6   | 212.21                | 4-Amino-1,8-naphthalimide        |                                                                                                                          | Apoptosis             | Enzyme | Inhibitor  | PARP                     |                     |                    | Banasik, M., et al., Specific inhibitors of poly(ADP-ribose) synthetase and mono(ADP-ribose)yltransferase J. Biol. Chem. 267, 1569-1575 (1992)                                                                                                |

| Rack No. | Rack Position | CATNUM | CAS number  | Mol. Weight Structure | Name                                             | Secondary Name                                                           | Class                 | Enzyme | Action     | Selectivity    | Solubility in Water | Solubility in DMSO     | Reference                                                                                                                                                                         |
|----------|---------------|--------|-------------|-----------------------|--------------------------------------------------|--------------------------------------------------------------------------|-----------------------|--------|------------|----------------|---------------------|------------------------|-----------------------------------------------------------------------------------------------------------------------------------------------------------------------------------|
| 01       | G05           | A 1910 | 20263-07-4  | 183.10                | (±)-2-Amino-4-phosphonobutyric acid              | (±)-AP-4                                                                 | Glutamate             |        | Antagonist | NMDA           |                     |                        | Collingridge, G. L., et al., Excitatory amino acid receptors in the vertebrate central nervous system Pharmacol. Rev. 40, 143-210 (1989)                                          |
| 01       | G06           | A 3145 | 520-36-5    | 270.24                | Apigenin                                         | 4',5,7-Trihydroxyflavone                                                 | Cell Cycle            |        | Inhibitor  |                |                     |                        | Sato, F., et al., Apigenin induces morphological differentiation and G2-M arrest in rat neuronal cells Biochem. Biophys. Res. Comm. 204, 578-584 (1994)                           |
| 01       | G07           | A 4147 | 81028-90-2  | 161.16                | 3-Amino-1-propanesulfonic acid sodium            |                                                                          | GABA                  |        | Agonist    | GABA-A         |                     |                        | Krantis, A., et al., Rat gastroduodenal motility in vivo: interaction of GABA and VIP in control of spontaneous relaxations. Am. J. Physiol. 275, 0 (1998)                        |
| 01       | G08           | A 4910 | 20263-06-3  | 169.07                | (±)-2-Amino-3-phosphonopropionic acid            | (±)-AP-3                                                                 | Glutamate             |        | Antagonist | NMDA           |                     |                        | Collingridge, G. L., et al., Excitatory amino acid receptors in the vertebrate central nervous system Pharmacol. Rev. 40, 143-210 (1989)                                          |
| 01       | G09           | A 5791 | 566-48-3    | 302.42                | 4-Androsten-4-ol-3,17-dione                      | 4-OH-A; 4-Hydroxy-4-androstene-3,17-dione                                | Hormone               | Enzyme | Inhibitor  | Aromatase      |                     |                        | Brodie, A.M., et al., Endocrinology 100, 1684 (1977)                                                                                                                              |
| 01       | G10           | G 8543 | 185259-85-2 | 377.49                | GR 4661                                          | 3-[3-(2-Dimethylaminoethyl)-1H-indol-5-yl]-N-(4-methoxybenzyl)acrylamide | Serotonin             |        | Agonist    | 5-HT1D         |                     |                        | O'Neill, M.F. and Sanger, G.L., Eur. J. Pharmacol. 370, 85-92 (1999)                                                                                                              |
| 01       | G11           | A 7148 | 2498-50-2   | 208.09                | 4-Aminobenzamide dihydrochloride                 |                                                                          | Biochemistry          | Enzyme | Inhibitor  | Trypsin        |                     |                        | Spencer, J.R., et al., Bioorg Med Chem Lett., 2002;12:2023-6.                                                                                                                     |
| 01       | H02           | 265128 | 399-76-8    | 179.15                | 5-Fluoroindole-2-carboxylic acid                 |                                                                          | Glutamate             |        | Antagonist | NMDA-Glycine   |                     |                        | Kaminski, R., et al., J neural Transm. 1998;105(2-3):133-46                                                                                                                       |
| 01       | H03           | A 0430 | 68781-13-5  | 137.57                | 1-Aminocyclopropanecarboxylic acid hydrochloride | ACPC                                                                     | Glutamate             |        | Agonist    | NMDA-Glycine   |                     |                        | Sheinin, A., et al., Neurosci. Lett. 317, 77 (2002)                                                                                                                               |
| 01       | H04           | R 0875 | 50-55-5     | 608.69                | Reserpine                                        | Methyl reserpate; 3,4,5-Trimethoxybenzoic acid ester                     | Serotonin             |        | Inhibitor  | Uptake         |                     |                        | Schachter, M., Moxonidine: a review of safety and tolerability after seven years of clinical experience. J. Hypertens. 17, S37-S39 (1999)                                         |
| 01       | H05           | A 1977 |             | 361.53                | N-arachidonylglycine                             | NAGly                                                                    | Cannabinoid           | Enzyme | Inhibitor  | FAAH           |                     |                        | Huang S M., et al., J. Biol. Chem. 276, 42639-42644 (2001)                                                                                                                        |
| 01       | H06           | A 3281 | 61714-27-0  | 377.34                | W-7 hydrochloride                                | N-(6-Aminoethyl)-5-chloro-1-naphthalenesulfonamide hydrochloride         | Intracellular Calcium |        | Antagonist | Calmodulin     |                     |                        | Suzuki, Y.J., et al., Modulation of Ca2+channel-gated Ca2+release by W-7 in cardiac myocytes. Cell Calcium 25, 191-198 (1999)                                                     |
| 01       | H07           | A 4393 | 41372-20-7  | 303.79                | Apomorphine hydrochloride hemihydrate            | 10,11-Dihydroxyaporphine hydrochloride hemihydrate                       | Dopamine              |        | Agonist    |                |                     |                        | Gessa, et al., eds., Apomorphine and Other Dopaminomimetics, New York, NY, USA (1981),                                                                                            |
| 01       | H08           | A 5006 | 74-79-3     | 174.20                | L-Arginine                                       |                                                                          | Nitric Oxide          |        | Precursor  |                | Yes                 | 50 mg/ml               | Boucher, J.L., et al., Nitric oxide biosynthesis, nitric oxide synthase inhibitors and arginase competition for L-arginine utilization. Cell. Mol. Life Sci. 55, 1015-1028 (1999) |
| 01       | H09           | A 5879 | 56-10-0     | 281.01                | 2-(2-Aminoethyl)isothiourea dihydrobromide       | AET; S-(2-Aminoethyl)isothiuronium dihydrobromide                        | Nitric Oxide          | Enzyme | Inhibitor  | NOS            |                     |                        | Southan, G.J., et al., Br. J. Pharmacol. 114, 510 (1995)                                                                                                                          |
| 01       | H10           | A 6566 | 117354-64-0 | 265.72                | 2-Hydroxysaclofen                                | (±)-3-Amino-2-(4-chlorophenyl)-2-hydroxy-propylsulfonic acid             | GABA                  |        | Antagonist | GABA-B         | Yes                 | 1.0 mg/ml              | Curtis, et al., Baclofen antagonism by 2-hydroxysaclofen in the cat spinal cord. Neurosci. Lett. 92, 97 (1988)                                                                    |
| 01       | H11           | A 7162 | 13138-33-5  | 139.09                | 3-Aminopropylphosphonic acid                     |                                                                          | GABA                  |        | Agonist    | GABA-B         |                     |                        | Lux-Lantos, et al., Activation of GABA B receptors in the anterior pituitary inhibits prolactin and luteinizing hormone secretion. Neuroendocrinology 56, 687 (1992)              |
| 02       | A02           | A 7250 | 616-91-1    | 163.20                | N-Acetyl-L-Cysteine                              |                                                                          | Glutamate             |        | Antagonist |                | Yes                 | 100 mg/ml with heating | Roederer, M., et al., Cytokine-stimulated human immunodeficiency virus replication is inhibited by N-acetyl-L-cysteine. Proc. Natl. Acad. Sci. USA 87, 4884-4888 (1990)           |
| 02       | A03           | A 7824 | 60-32-2     | 131.18                | 6-Aminohexanoic acid                             | 6-Aminocaproic acid; EACA                                                | Immune System         |        | Inhibitor  | Blood Clotting | Yes                 | 0.5 M @ 20C            | Soter, N.A., et al., Inhibition by 6-aminocaproic acid of the activation of the first component of the complement system. J. Immunol. 114, 928 (1975)                             |
| 02       | A04           | A 8723 | 645-05-6    | 210.28                | Altretamine                                      | N,N,N',N',N'',N''-Hexamethyl-1,3,5-triazine-2,4,6-triamine               | DNA Metabolism        |        | Inhibitor  |                |                     |                        | Lee, C.R. & Faulds, D., Altretamine. A review of its pharmacodynamic and pharmacokinetic properties, and therapeutic potential in cancer chemotherapy. Drugs 49, 932 (1995)       |
| 02       | A05           | A 9501 | 60-92-4     | 329.21                | Adenosine 3',5'-cyclic monophosphate             | cAMP; 3',5'-Cyclic AMP                                                   | Phosphorylation       | Enzyme | Activator  | PKA            | Yes                 | 5 mg/ml                | Spada, A., et al., Cyclic AMP and calcium in the transduction of hypothalamic neurohormone action in human pituitary tumors Horm. Res. 47, 235-239 (1997)                         |
| 02       | A06           | A 9834 | 1121-91-1   | 166.67                | (±)-AMT hydrochloride                            | (±)-2-Amino-5,6-dihydro-6-methyl-4H-1,3-thiazine hydrochloride           | Nitric Oxide          | Enzyme | Inhibitor  | iNOS           |                     |                        | Nakane, M., et al., Mol. Pharmacol. 47, 831 (1995)                                                                                                                                |

| Rack No. | Rack Position | CATNUM | CAS number  | Mol. Weight Structure | Name                                          | Secondary Name                                                                 | Class          | Enzyme | Action               | Selectivity          | Solubility in Water | Solubility in DMSO | Reference                                                                                                                                                                                                                                                                             |
|----------|---------------|--------|-------------|-----------------------|-----------------------------------------------|--------------------------------------------------------------------------------|----------------|--------|----------------------|----------------------|---------------------|--------------------|---------------------------------------------------------------------------------------------------------------------------------------------------------------------------------------------------------------------------------------------------------------------------------------|
| 02       | A07           | A-024  | 35788-27-3  | 294.27                | 5'-N-Methyl carboxamidoadenosine              | MECA                                                                           | Adenosine      |        | Agonist              | A2 > A1              | Slightly Soluble    |                    | Bruns, et al., Characterization of the A2adenosine receptor labeled by [3H]NECA in rat striatal membranes. Mol. Pharmacol. 29, 331 (1986)                                                                                                                                             |
| 02       | A08           | A-145  | 149981-25-9 | 376.39                | 1-Allyl-3,7-dimethyl-8-p-sulphophenylxanthine |                                                                                | Adenosine      |        | Antagonist           | A2                   | Yes                 |                    | Jacobson, et al., Effect of trifluoromethyl and other substituents on activity of xanthines at adenosine receptors. J. Med. Chem. 38, 2639 (1993)                                                                                                                                     |
| 02       | A09           | A-178  | 968-81-0    | 324.40                | Acetohexamide                                 |                                                                                | Hormone        |        | Releaser             | Insulin              |                     |                    | Takada, H. et al., J Pharmacol Exp Ther. 1998;287:504-7.                                                                                                                                                                                                                              |
| 02       | A10           | A-243  | 121050-04-2 | 145.12                | cis-Azetidine-2,4-dicarboxylic acid           |                                                                                | Glutamate      |        | Modulator            | NMDA                 | Yes                 |                    | Kozikowski, et al.; J. Med. Chem. 33, 1561 (1990)                                                                                                                                                                                                                                     |
| 02       | A11           | B 0753 | 57-71-6     | 101.11                | 2,3-Butanedione monoxime                      | Diacetyl monoxime                                                              | K+ Channel     |        | Blocker              | ATP-sensitive        |                     |                    | Habazettl, H., et al., Cardiovasc. Res. 37, 684 (1998)                                                                                                                                                                                                                                |
| 02       | B02           | A 7275 | 1118-90-7   | 161.16                | L-2-aminoadipic acid                          | Aad; (S)-2-Aminohexanedioic acid; L-Homoglutamic acid                          | Glutamate      | Enzyme | Inhibitor            | Glutamine synthetase |                     |                    | McBean, J., et al., Inhibition of the glutamate transporter and glial enzymes in rat striatum by the gliotoxin alpha aminoadipate Br. J. Pharmacol. 113, 536-540 (1994)                                                                                                               |
| 02       | B03           | A 7845 | 252930-37-3 | 322.26                | ATPO                                          | (R,S)-2-Amino-3-[5-tert-butyl-3-(phosphonomethoxy)-4-isoxazolyl]propionic acid | Glutamate      |        | Antagonist           | GluR1-4              | Insoluble           |                    | Madsen, U. et al., J. Med. Chem. 39, 1682-1691 (1996)                                                                                                                                                                                                                                 |
| 02       | B04           | A 8762 | 2494-12--4  | 195.22                | N-Acetyldopamine monohydrate                  |                                                                                | Dopamine       |        | Precursor            |                      |                     |                    | Kuhn, D.M., Arthur, R., Jr., Dopamine inactivates tryptophan hydroxylase and forms a redox-cycling quinoprotein: possible endogenous toxin to serotonin neurons J. Neurosci. 18, 7111 (1998)                                                                                          |
| 02       | B05           | A 9512 | 69815-49-5  | 319.27                | L(-)-Norepinephrine bitartrate                | (-)-Arterenol bitartrate; Noradrenaline bitartrate                             | Adrenoceptor   |        | Agonist              | alpha, beta1         | Yes                 | 46 mg/ml           | Kitayama, S., and Dohi, T., Eur J Pharmacol. 2003 Oct. 31;479(1-3):65-70                                                                                                                                                                                                              |
| 02       | B06           | A 9898 | 51865-79-3  | 454.45                | (-)Amethopterin                               |                                                                                | DNA Metabolism |        | Inhibitor            |                      | Yes                 |                    | Itoh, T., et al., Chirality. 2001;13(3):164-9                                                                                                                                                                                                                                         |
| 02       | B07           | P 0248 | 57568-80-6  | 381.99                | PNU-37887A                                    | N-(1-Adamantyl)-N'-cyclohexyl-4-morpholinecarboxamide hydrochloride            | K+ Channel     |        | Inhibitor            | Kir 6.1/SUR2B        | Insoluble           | 23 mg/ml           | Kovalev, H., et al., Br. J. Pharmacol. 2004; 141:867-873                                                                                                                                                                                                                              |
| 02       | B08           | A-155  | 67684-64-4  | 173.17                | trans-(±)-ACPD                                | trans-(±)-1-Amino-1,3-cyclopentenedicarboxylic acid                            | Glutamate      |        | Agonist              | Metabotropic         | Yes                 | 1.0 mg/ml          | Palmer, et al., trans-ACPD a selective agonist of the phosphoinositide-coupled excitatory amino acid receptor. Eur. J. Pharmacol. 166, 585 (1989)                                                                                                                                     |
| 02       | B09           | A-196  | 168977-94-4 | 173.58                | SKF 97541 hydrochloride                       | 3-Aminopropyl-(methyl)phosphinic acid hydrochloride                            | GABA           |        | Agonist              | GABA-B               | Yes                 |                    | Bon, C., et al., Electrophysiological actions of GABAB agonists and antagonists in rat dorso-lateral septal neurones in vitro Br. J. Pharmacol. 118, 961-967 (1996)                                                                                                                   |
| 02       | B10           | A-244  | 161596-92-9 | 145.12                | trans-Azetidine-2,4-dicarboxylic acid         | tADA                                                                           | Glutamate      |        | Agonist              | mGluR1, mGluR5       | Yes                 | 5.7 mg/ml          | Favaron, et al., trans-Azetidine-2,4-dicarboxylic acid activates neuronal metabotropic receptors. Neuroreport 4, 967-970 (1993)                                                                                                                                                       |
| 02       | B11           | S 5192 | 174635-69-9 | 380.49                | SB 222200                                     |                                                                                | Tachykinin     |        | Antagonist           | NK3                  | Insoluble           |                    | Sarau, H.M., et al., J Pharmacol Exp Ther. 2000 Oct;295(1):373-81                                                                                                                                                                                                                     |
| 02       | C02           | A 7342 | 1016-47-3   | 202.26                | N-Acetyltryptamine                            | 3-(2-N-Acetylaminoethyl)indole                                                 | Melatonin      |        | Agonist - Antagonist |                      | Yes                 |                    | Dudocovich, M.L., Melatonin receptor antagonists that differentiate between the human Mel1a and Mel1b recombinant subtypes are used to assess the pharmacological profile of the rabbit retina ML1 presynaptic heteroreceptor. Naunyn-Schmiedeberg's Arch. Pharmacol. 355, 365 (1997) |
| 02       | C03           | A 8003 | 315-30-0    | 136.11                | Allopurinol                                   | 1H-Pyrazolo[3,4-d]pyrimidin-4-ol                                               | Cell Stress    | Enzyme | Inhibitor            | Xanthine oxidase     |                     |                    | Kelley, W.N. and Beardmore, T.D., Science 169, 388 (1970)                                                                                                                                                                                                                             |
| 02       | C04           | A 8835 | 1937-19-5   | 110.55                | Aminoguanidine hydrochloride                  | Guanylylhydrazine hydrochloride                                                | Nitric Oxide   | Enzyme | Inhibitor            | NOS                  |                     |                    | Chang, K.C., et al., Br J Pharmacol. 2004 Jul 12 [Epub ahead of print]                                                                                                                                                                                                                |
| 02       | C05           | A 9561 | 1428-95-1   | 311.78                | 5-(N,N-hexamethylene)amiloride                |                                                                                | Ion Pump       |        | Inhibitor            | Na+/H+ Antiporter    |                     |                    | Jiang, T., Steinberg, S.F., Am. J. Physiol. 273, H1044 (1997)                                                                                                                                                                                                                         |
| 02       | C06           | A 9899 | 2508-72-7   | 299.81                | Antozoline hydrochloride                      | 2-(N-Benzyl(anilino)methyl)-2-imidazoline hydrochloride                        | Imidazoline    |        | Agonist              |                      |                     |                    | Berdeu, D., et al., Evidence for two different imidazoline sites on pancreatic B cells and vascular bed in rat. Eur. J. Pharmacol. 275, 91 (1995)                                                                                                                                     |
| 02       | C07           | A-114  | 58640-82-7  | 293.84                | (+)-N-Allylnormetazocine hydrochloride        | (+)-NANM hydrochloride; SKF-10047                                              | Opioid         |        | Agonist              | sigma1               | Yes                 |                    | Itzhak, Y., Pharmacological specificity of some psychotomimetic and antipsychotic agents for thes and PCP binding sites. Life Sci. 42, 745 (1988)                                                                                                                                     |
| 02       | C08           | A-156  | 7619-35-4   | 293.84                | (±)-N-Allylnormetazocine hydrochloride        | (±)-NANM hydrochloride; (±)-SKF-10047                                          | Opioid         |        | Agonist              | sigma1               |                     |                    | Shimazu, S., et al. Eur J Pharmacol. 2000 Jan 28;388(2):139-46                                                                                                                                                                                                                        |
| 02       | C09           | A-201  | 55199-25-2  | 101.11                | cis-4-Aminocrotic acid                        | CACA                                                                           | GABA           |        | Agonist              | GABA-C               | Yes                 | 124 mg/ml          | Feigenspan, et al., Pharmacology of GABA receptor Cl-channels in rat retinal bipolar cells. Nature 361, 159 (1993)                                                                                                                                                                    |

| Rack No. | Rack Position | CATNUM | CAS number  | Mol. Weight Structure | Name                                               | Secondary Name                                                           | Class                 | Enzyme | Action     | Selectivity                  | Solubility in Water | Solubility in DMSO | Reference                                                                                                                                                                                                                     |
|----------|---------------|--------|-------------|-----------------------|----------------------------------------------------|--------------------------------------------------------------------------|-----------------------|--------|------------|------------------------------|---------------------|--------------------|-------------------------------------------------------------------------------------------------------------------------------------------------------------------------------------------------------------------------------|
| 02       | C10           | A-252  | 175521-95-6 | 189.73                | AGN 192403 hydrochloride                           | (2-endo,3exo)-3-(Methylethyl)-bicyclo[2.2.1]heptan-2-amine hydrochloride | Imidazoline           |        | Ligand     | I1                           | Yes                 | 20 mg/ml           | Munk, et al., Synthesis and pharmacologic evaluation of 2-endo-Amino-3-exo-isopropyl-bicyclo[2.2.1]heptane: A potent imidazoline1 receptor specific agent. J. Med. Chem. 39, 1193-1195 (1996)                                 |
| 02       | C11           | B 1183 |             | 323.35                | 1-benzoyl-5-methoxy-2-methylindole-3-acetic acid   |                                                                          | Multi-Drug Resistance |        | Inhibitor  | MRP1                         | Slightly Soluble    | <0.17 mg/ml        | Maguire, A.R., Synthesis of indomethacin analogues for evaluation as modulators of MRP activity. Bioorg. Med. Chem. 9, 745 (2001)                                                                                             |
| 02       | D02           | A 7410 | 2016-88-8   | 266.09                | Amiloride hydrochloride                            |                                                                          | Na+ Channel           |        | Blocker    | Epithelial                   | Yes                 | 50 mg/ml           | Tang, C.M., et al., Amiloride selectively blocks the low threshold (T) calcium channel. Science 240, 213-215 (1988)                                                                                                           |
| 02       | D03           | A 8404 | 549-18-8    | 313.87                | Amitriptyline hydrochloride                        |                                                                          | Adrenoceptor          |        | Inhibitor  | Uptake                       | Yes                 |                    | Stanton, T., et al., Antagonism of the five cloned human muscarinic cholinergic receptors expressed in CHO-K1 cells by antidepressants and antihistaminics Biochem. Pharmacol. 45, 2352-2354 (1993)                           |
| 02       | D04           | A 9013 | 402-40-4    | 566.42                | BW 284c51                                          | 1,5-Bis(4-allyldimethylammoniumphenyl)pentan-3-one dibromide             | Cholinergic           | Enzyme | Inhibitor  | Acetylcholinesterase         |                     |                    | Dipatre, P.L., et al., J. Histochem. Cytochem. 41, 129 (1993)                                                                                                                                                                 |
| 02       | D05           | A 9630 | 63-05-8     | 286.42                | 4-Androstene-3,17-dione                            | Androstenedione; 3,17-Dioxo-4-androstene                                 | Hormone               |        | Precursor  | Androgen                     |                     |                    | Provost, P.R., Androgen formation and metabolism in the pulmonary epithelial cell line A549: expression of 17b-hydroxysteroid dehydrogenase type 5 and 3a-hydroxysteroid dehydrogenase type 3. Endocrinology 141, 2786 (2000) |
| 02       | D06           | A 9950 | 72432-10-1  | 219.24                | Aniracetam                                         |                                                                          | Glutamate             |        | Agonist    | AMPA                         |                     |                    | Johansen, T.H., et al., Interactions among GYKI-52466, cyclothiazide, and aniracetam at recombinant AMPA and kainate receptors. Mol. Pharmacol. 48, 946-955 (1995)                                                            |
| 02       | D07           | A-129  | 14028-44-5  | 313.79                | Amoxapine                                          |                                                                          | Adrenoceptor          |        | Inhibitor  | Uptake                       |                     |                    | Kinney, J.L., and Evans, R.L., Jr., Evaluation of amoxapine Clin. Pharm. 1, 417-424 (1982)                                                                                                                                    |
| 02       | D08           | A-162  |             | 179.65                | 1-Amino-1-cyclohexanecarboxylic acid hydrochloride |                                                                          | Neurotransmission     |        | Substrate  |                              |                     |                    |                                                                                                                                                                                                                               |
| 02       | D09           | A-202  | 89705-21-5  | 386.41                | N6-2-(4-Aminophenyl)ethyladenosine                 | APNEA                                                                    | Adenosine             |        | Agonist    | A3                           | Insoluble           |                    | Fozard, et al., Adenosine A3receptors mediated hypotension in the angiotensin II-supported circulation of the pithed rat Br. J. Pharmacol. 109, 3-5 (1993)                                                                    |
| 02       | D10           | A-254  | 168560-79-0 | 221.21                | AIDA                                               | 1-Aminoindan-1,5-dicarboxylic acid; UPF 523                              | Glutamate             |        | Antagonist | mGluR1                       | Yes                 | 2.0 mg/ml          | Pellicciari, et al., 1-Aminoindan-15-dicarboxylic acid: A novel antagonist at phospholipase C-linked metabotropic glutamate receptors. J. Med. Chem. 38, 3717-3719 (1995)                                                     |
| 02       | D11           | B 1266 | 106-51-4    | 108.10                | p-Benzoquinone                                     | Quinone; p-BQ                                                            | DNA Repair            |        | Inhibitor  | G:C site                     |                     |                    | Siraki, A.G., Toxicol.2004 Jun 3 [Epub ahead of print]                                                                                                                                                                        |
| 02       | E02           | A 7655 | 29122-68-7  | 266.34                | (±)-Atenolol                                       |                                                                          | Adrenoceptor          |        | Antagonist | beta1                        | Yes                 | 0.3 mg/ml          | Doggrell, S.A., The effects of (±)-, (+)-, and (-)-atenolol, sotalol, and amosulalol on the rat left atria and portal vein. Chirality 5, 8-14 (1993)                                                                          |
| 02       | E03           | A 8423 | 1951-25-3   | 681.78                | Amiodarone hydrochloride                           |                                                                          | Adrenoceptor          |        | Agonist    | alpha/beta                   |                     |                    | McCarthy, T.C., et al., J Pharmacol Exp Ther. 2004 Jul 20                                                                                                                                                                     |
| 02       | E04           | A 9251 | 58-61-7     | 267.25                | Adenosine                                          |                                                                          | Adenosine             |        | Agonist    |                              |                     |                    | Krupa A., et al., J Mol Biol. 2004 Jun 18;339(5):102-39                                                                                                                                                                       |
| 02       | E05           | A 9657 | 125-84-8    | 232.28                | (±)-p-Aminoglutethimide                            |                                                                          | Biochemistry          | Enzyme | Inhibitor  | P450-dependent hydroxylation | Slightly Soluble    | 0.2 mg/ml          | Gilman, A.G. and Goodman, L.S., ed., Goodman and Gilman's The Pharmacological Basis of Therapeutics 9th ed., (1996),9, 1229, 1274-1275                                                                                        |
| 02       | E06           | A-003  | 75922-48-4  | 284.32                | 1,3-Diethyl-8-phenylxanthine                       | DPX                                                                      | Adenosine             |        | Antagonist | A1                           |                     |                    | Proc. Natl. Acad. Sci. USA, 78, 3260 (1981)                                                                                                                                                                                   |
| 02       | E07           | A-138  |             | 322.45                | Aminobenzotropine                                  | ABT                                                                      | Cholinergic           |        | Ligand     | Muscarinic                   |                     |                    | Haga, K., and Haga, T., Affinity chromatography of the muscarinic acetylcholine receptor J. Biol. Chem. 258, 13575-13579 (1983)                                                                                               |
| 02       | E08           | A-164  | 60719-83-7  | 292.21                | Alaproclate hydrochloride                          | D,L-Alanine, 2-(4-chlorophenyl)-1,1-dimethylethyl ester hydrochloride    | Serotonin             |        | Inhibitor  | Reuptake                     | Yes                 |                    | Lindberg, U.H., et al., Inhibitors of neuronal monoamine uptake. 2. Selective inhibition of 5-hydroxytryptamine uptake by amino acid esters of phenethyl alcohols. J. Med. Chem. 21, 448 (1978)                               |
| 02       | E09           | A-206  | 548-42-5    | 238.34                | Agroclavine                                        | 8,9-Didehydro-6,8-dimethyl-ergoline                                      | Dopamine              |        | Agonist    |                              |                     |                    | Bobkova, N.V., et al., Neuro Behav Physiol. 2003 May;33(4):301-6                                                                                                                                                              |

| Rack No. | Rack Position | CATNUM | CAS number  | Mol. Weight Structure | Name                                                   | Secondary Name                                                             | Class              | Enzyme | Action     | Selectivity       | Solubility in Water | Solubility in DMSO  | Reference                                                                                                                                                                                                                            |
|----------|---------------|--------|-------------|-----------------------|--------------------------------------------------------|----------------------------------------------------------------------------|--------------------|--------|------------|-------------------|---------------------|---------------------|--------------------------------------------------------------------------------------------------------------------------------------------------------------------------------------------------------------------------------------|
| 02       | E10           | A-255  |             | 365.90                | A-77636 hydrochloride                                  |                                                                            | Dopamine           |        | Agonist    | D1                | Yes                 | 10 mg/ml            | Kebabian, et al., A-77636: A potent and selective D1receptor agonist with antiparkinsonian activity in marmosets Eur. J. Pharmacol. 229, 203-209 (1992)                                                                              |
| 02       | E11           | B 1381 | 51116-01-9  | 446.09                | 8-Bromo-cGMP sodium                                    | 8-Bromoguanosine-3',5'-cyclophosphate sodium                               | Cyclic Nucleotides | Enzyme | Activator  |                   | Yes                 | 100 mg/ml           | Francis, S.H., et al., Relaxation of vascular and tracheal smooth muscle by cyclic nucleotide analogs that preferentially activate purified cGMP-dependent protein kinase. Mol. Pharmacol. 34, 506-517 (1988)                        |
| 02       | F02           | A 7755 | 1852-53-5   | 292.47                | 5alpha-Androstane-3alpha,17beta-diol                   | Dihydroandrosterone; 3alpha,17beta-Dihydroxy-5alpha-androstane             | Hormone            |        | Metabolite | Androgen          |                     |                     | Biswas, M.G., et al.,J. Biol. Chem. 272, 19599 (1997)                                                                                                                                                                                |
| 02       | F03           | A 8456 | 30827-99-7  | 239.70                | 4-(2-Aminoethyl)benzenesulfonyl fluoride hydrochloride | AEBSF                                                                      | Biochemistry       | Enzyme | Inhibitor  | Serine Protease   | Yes                 | 50 mg/ml (unstable) | Baker, B.R. and Cory, M.,J. Med. Chem. 14, 119 (1971)                                                                                                                                                                                |
| 02       | F04           | A 9256 | 56-84-8     | 133.10                | L-Aspartic acid                                        |                                                                            | Glutamate          |        | Agonist    |                   | Yes                 | 5.0 mg/ml           | Low, S.J, Int J Clin Pharmacol Ther. 2004 Jan;42(1):1-14                                                                                                                                                                             |
| 02       | F05           | A 9699 |             | 116.12                | (±)-HA-966                                             | (±)-3-Amino-1-hydroxy-2-pyrrolidone                                        | Glutamate          |        | Antagonist | NMDA-glycine      |                     |                     | Myhrer, T. and Andersen, J.M., Eur J Pharmacol. 2001;428:323-30.                                                                                                                                                                     |
| 02       | F06           | A-013  | 80206-91-3  | 336.33                | 8-(p-Sulphophenyl)theophylline                         |                                                                            | Adenosine          |        | Antagonist | A1 > A2           | Yes                 | 12 mg/ml            | Bruns, et al., Characterization of the A2adenosine receptor labeled by [3H]NECA in rat striatal membranes. Mol. Pharmacol. 29, 331-346 (1986)                                                                                        |
| 02       | F07           | A-140  | 35516-99-5  | 260.13                | Arecaidine propargyl ester hydrobromide                | APE                                                                        | Cholinergic        |        | Agonist    | M2                | Yes                 |                     | Moser, U., et al., Aliphatic and heterocyclic analogues of arecaidine propargyl ester. Structure-activity relationships of mono- and bivalent ligands at muscarinic M1M4, M2and M3receptor subtypes. Arzneim.-Forsch. 45, 449 (1995) |
| 02       | F08           | P 9872 |             | 334.38                | Psora-4                                                | 5-(4-Phenylbutoxy)psoralen                                                 | K+ Channel         |        | Inhibitor  | Kv1.3             | Insoluble           | 16 mg/ml            | Vennekamp, J., et al., Mol. Pharmacol. 65, 1364-1374 (2004)                                                                                                                                                                          |
| 02       | F09           | A-230  |             | 127.14                | gamma-Acetylinic GABA                                  | 4-Amino-5-hexynoic acid                                                    | GABA               | Enzyme | Inhibitor  | GABA transaminase | Yes                 | 5.0 mg/ml           | Schousboe, et al., Stereoselective uptake of GABA-transaminase inhibitors-vinyl GABA andg-acetylenic GABA into neurons and astrocytes. Neurochem. Res. 11, 1497 (1986)                                                               |
| 02       | F10           | A-263  | 83654-14-2  | 228.25                | ATPA                                                   | (RS)-2-Amino-3-(3-hydroxy-5-tert-butylisoxazol-4-yl)propanoic acid         | Glutamate          |        | Agonist    | Kainate           | Yes                 | 2.5 mg/ml           | Lauridsen, et al., Ibotenic acid analogues. Synthesis, molecular flexibility andin vitroactivity of agonists and antagonists at central glutamic acid receptors. J. Med. Chem. 28, 668 (1985)                                        |
| 02       | F11           | B 1427 | 127243-85-0 | 519.29                | H-89                                                   | N-[2-(p-Bromocinnamylamino)ethyl]-5-isoquinolinesulfonamide dihydrobromide | Phosphorylation    | Enzyme | Inhibitor  | PKA               |                     |                     | Chijiwa, T., et al.,J. Biol. Chem. 265, 5267 (1990)                                                                                                                                                                                  |
| 02       | G02           | A 7762 | 16338-48-0  | 115.13                | L-allylglycine                                         | L-2-Amino-4-pentenoic acid                                                 | Biochemistry       | Enzyme | Inhibitor  |                   | Yes                 | 100 mg/ml           | Abshire, V.M., et al., Injection of L-allylglycine into the posterior hypothalamus in rats causes decreases in local GABA which correlate with increases in heart rate. Neuropharmacology 27, 1171-1177 (1988)                       |
| 02       | G03           | A 8598 | 10212-25-6  | 261.67                | Ancitabine hydrochloride                               | Cyclocytidine hydrochloride; Cyclo-C                                       | DNA Metabolism     |        | Inhibitor  |                   |                     |                     | Nakamura, K., Antiviral effect of antileukemic drugs N4-behenoyl-1-b-D-arabinofuranosylcytosine (BH-AC) and 2,2'-anhydro-1-b-D-arabinofuranosylcytosine (cyclo-C) against human cytomegalovirus. J. Med. Virol. 31, 141 (1990)       |
| 02       | G04           | A 9335 | 472-617-7   | 596.86                | Astaxanthin                                            | 3,3'-Dihydroxy-beta,beta-carotene-4,4'-dione                               | Cell Stress        |        | Inhibitor  | Antioxidant       |                     |                     | Schroeder, W.A.and Johnson, E.A.,J. Biol. Chem. 270, 18374 (1995)                                                                                                                                                                    |
| 02       | G05           | A 9755 | 53-41-8     | 290.45                | Androsterone                                           | 5a-Androstan-3a-ol-17-one; cis-Androsterone                                | Hormone            |        |            | Androgen          |                     |                     | Chai, X., et al.,J. Biol. Chem. 272, 33125 (1997)                                                                                                                                                                                    |
| 02       | G06           | A-022  | 89073-57-4  | 392.44                | 1,3-Dipropyl-8-p-sulphophenylxanthine                  |                                                                            | Adenosine          |        | Antagonist | A1 > A2           | Yes                 | 0.43 mg/ml          | Daly, et al., 13-Dialkyl-8-(p-sulphophenyl)xanthines: Potent water-soluble antagonists for A1- and A2-adenosine receptors. J. Med. Chem. 28, 487 (1985)                                                                              |
| 02       | G07           | A-142  | 56715-13-0  | 266.34                | R(+)-Atenolol                                          |                                                                            | Adrenoceptor       |        | Antagonist | beta1             | Insoluble           |                     | Adams-Pearson et al., A stereoselective central hypotensive action of atenolol. J. Pharmacol. Exp. Ther. 250, 759 (1989)                                                                                                             |
| 02       | G08           | S 0568 | 143797-62-0 | 304.78                | SB 200646 hydrochloride                                | N-(1-Methyl-1H-indol-5-yl)-N'-3-pyridinyl-urea hydrochloride               | Serotonin          |        | Antagonist | 5-HT2C/2B         |                     |                     | Meller, R. et al.,J. Neurosci. Res. 67, 399-405 (2002)                                                                                                                                                                               |
| 02       | G09           | A-236  |             | 399.41                | AB-MECA                                                | N6-(4-Aminobenzyl)-9-[5-(methylcarbonyl)-beta-D-ribofuranosyl]adenine      | Adenosine          |        | Agonist    | A3                | Insoluble           |                     | Jacobson, et al., A role for central A3-adenosine receptors. Mediation of behavioral depressant effects. FEBS Lett. 336, 57-60 (1993)                                                                                                |

| Rack No. | Rack Position | CATNUM | CAS number  | Mol. Weight Structure | Name                                           | Secondary Name                                                                 | Class                | Enzyme | Action     | Selectivity                  | Solubility in Water | Solubility in DMSO | Reference                                                                                                                                                                                                                                            |
|----------|---------------|--------|-------------|-----------------------|------------------------------------------------|--------------------------------------------------------------------------------|----------------------|--------|------------|------------------------------|---------------------|--------------------|------------------------------------------------------------------------------------------------------------------------------------------------------------------------------------------------------------------------------------------------------|
| 02       | G10           | A-265  | 160928-38-1 | 785.06                | ARL 67156 trisodium salt                       | FPL 67156                                                                      | P2 Receptor          | Enzyme | Inhibitor  | ecto-ATPase                  | Yes                 | 10 mg/ml           | Crack, B., et al., Pharmacological and biochemical analysis of FPL 67156 a novel selective inhibitor of ecto-ATPase Br. J. Pharmacol. 114, 475-481 (1995)                                                                                            |
| 02       | G11           | B 1552 | 88070-98-8  | 317.18                | Bromoenoil lactone                             | BEL; E-6-(Bromoethylene)tetrahydro-3-(1-naphthyl)-2H-pyran-2-one               | Lipid                | Enzyme | Inhibitor  | PLA2                         |                     |                    | Daniels, S.B., Haloenol lactones: potent enzyme-activated irreversible inhibitors for chymotrypsin. J. Biol. Chem. 258, 15046 (1983)                                                                                                                 |
| 02       | H02           | H-123  | 84468-17-7  | 324.23                | H-9 dihydrochloride                            | N-(2-Aminoethyl)-5-isoquinolinesulfonamide dihydrochloride                     | Phosphorylation      | Enzyme | Inhibitor  | cAMP- and cGMP-dependent PKs | Yes                 |                    | Thueson, D.O. et al., Biochem Biophys Res Commun. 1987;144:732-40.                                                                                                                                                                                   |
| 02       | H03           | A 8676 | 13707-88-5  | 285.82                | Alprenolol hydrochloride                       |                                                                                | Adrenoceptor         |        | Antagonist | beta                         | Yes                 | 50 mg/ml           | Surman, A.J., and Doggrell, S.A., Alprenolol and bromoacetylalprenololmethane are competitive slowly reversible antagonists at the beta1-adrenoceptors of rat left atria J. Cardiovasc. Pharmacol. 21, 35-39 (1993)                                  |
| 02       | H04           | A 9345 | 19384-53-9  | 272.69                | N-(4-Amino-2-chlorophenyl)phthalimide          |                                                                                | Anticonvulsant       |        |            |                              | Insoluble           |                    | Vamecq, J., et al., Synthesis and anticonvulsant and neurotoxic properties of substituted N-phenyl derivatives of the phthalimide pharmacophore. J. Med. Chem. 43, 1311 (2000)                                                                       |
| 02       | H05           | A 9809 | 54301-15-4  | 429.93                | Amsacrine hydrochloride                        | m-AMSA hydrochloride                                                           | DNA Repair           | Enzyme | Inhibitor  | Topoll                       |                     |                    | Nelson, E.M., et al., Mechanism of antitumor drug action: poisoning of mammalian DNA topoisomerase II on DNA by 4-(9-acridinylamino)-methanesulfon-m-anisidide. Proc. Natl. Acad. Sci. USA 81, 1361-1365 (1984)                                      |
| 02       | H06           | A-023  | 43170-89-4  | 641.20                | 2-Methylthioadenosine triphosphate tetrasodium | 2-Methylthio ATP tetrasodium                                                   | P2 Receptor          |        | Agonist    | P2Y                          | Yes                 | 13 mg/ml           | Cusack, et al., Specific but noncompetitive inhibition by 2-alkylthio analogs of adenosine 5'-monophosphate and adenosine 5'-triphosphate of human platelet aggregation induced by adenosine 5'-diphosphate. Br. J. Pharmacol. 75, 397-400 (1982)    |
| 02       | H07           | A-143  | 93379-54-5  | 266.34                | S(-)-Atenolol                                  |                                                                                | Adrenoceptor         |        | Antagonist | beta1                        | Insoluble           |                    | Pearson, A.A., et al., A stereoselective central hypotensive action of atenolol J. Pharmacol. Exp. Ther. 250, 759-763 (1989)                                                                                                                         |
| 02       | H08           | A-167  | 81338-23-0  | 225.18                | D(-)-2-Amino-7-phosphonoheptanoic acid         | D-AP-7                                                                         | Glutamate            |        | Antagonist | NMDA                         | Yes                 |                    | Stone, T.W., The relative potencies of (-)-2-amino-5-phosphonovalerate and (-)-2-amino-7-phosphonoheptanoate as antagonists of N-methylaspartate and quinolinic acids and repetitive spikes in rat hippocampal slices Brain Res. 381, 195-198 (1986) |
| 02       | H09           | A-242  |             | 214.18                | Alloxazine                                     | Isoalloxazine                                                                  | Adenosine            |        | Antagonist | A2b                          | Insoluble           |                    | Brackett, L.E., Daly, J.W., Functional characterization of the A2adenosine receptor in NIH 3T3 fibroblasts Biochem. Pharmacol. 47, 801-814 (1994)                                                                                                    |
| 02       | H10           | B 0385 | 4419-39-0   | 408.93                | Beclomethasone                                 | 9alpha-Chloro-16beta-methyl-1,4-pregnadiene-11beta,17alpha,21-triol-3,20-dione | Hormone              |        |            | Glucocorticoid               |                     |                    | Schmidt, J., et al., The effect of different corticosteroids and cyclosporin A on interleukin-4 and interleukin-5 release from murine TH2-type T cells Eur. J. Pharmacol. 260, 247-250 (1994)                                                        |
| 02       | H11           | B 2009 | 55-21-0     | 121.14                | Benzamide                                      | Benzoylamide                                                                   | Apoptosis            | Enzyme | Inhibitor  | PARS                         |                     |                    | Shiokawa, D., et al., Inhibitors of poly(ADP-ribose) polymerase suppress nuclear fragmentation and apoptotic-body formation during apoptosis in HL-60 cells. FEBS Lett. 413, 99-103 (1997)                                                           |
| 03       | A02           | B 2050 | 74209-34-0  | 242.03                | 3-Bromo-7-nitroindazole                        |                                                                                | Nitric Oxide         | Enzyme | Inhibitor  | NOS                          |                     |                    | Bland-Ward, P.A., and Moore, P.K., 7-Nitro indazole derivatives are potent inhibitors of brain, endothelium and inducible isoforms of nitric oxide synthase Life Sci. 57, PL131-PL135 (1995)                                                         |
| 03       | A03           | B 3023 | 28395-03-1  | 364.42                | Bumetanide                                     | 3-(Aminosulfonyl)-5-(butylamino)-4-phenoxybenzoic acid                         | Ion Pump             |        | Inhibitor  | Na+-K+-2Cl-cotransporter     |                     |                    | Isernring, P. and Forbush, B., J. Biol. Chem. 272, 24556 (1997)                                                                                                                                                                                      |
| 03       | A04           | B 5399 | 1134-47-0   | 213.67                | (±)-Baclofen                                   | Lioresal                                                                       | GABA                 |        | Agonist    | GABA-B                       |                     |                    | Park SK, et al/ Neurosci Res. 2004 Aug;49(4):405-16                                                                                                                                                                                                  |
| 03       | A05           | B 7651 | 20350-15-6  | 280.37                | Brefeldin A from Penicillium brefeldianum      | BFA; Ascotoxin, Cyanein                                                        | Cytoskeleton and ECM |        | Inhibitor  | Golgi apparatus              |                     |                    | Linaric, C.M., et al., Activation of the sphingomyelin cycle by brefeldin A: effects of brefeldin A on differentiation and implications for a role for ceramide in regulation of protein trafficking Cell. Growth Differ. 7, 765-774 (1996)          |



| Rack No. | Rack Position | CATNUM | CAS number  | Mol. Weight Structure | Name                                    | Secondary Name                                                               | Class           | Enzyme | Action     | Selectivity                          | Solubility in Water | Solubility in DMSO | Reference                                                                                                                                                                                                                |
|----------|---------------|--------|-------------|-----------------------|-----------------------------------------|------------------------------------------------------------------------------|-----------------|--------|------------|--------------------------------------|---------------------|--------------------|--------------------------------------------------------------------------------------------------------------------------------------------------------------------------------------------------------------------------|
| 03       | A06           | B 9308 | 314776-92-6 | 417.56                | BP 897                                  | N-[4-(4-(2-methoxyphenyl)piperazinyl)butyl]-2-naphthamide                    | Dopamine        |        | Agonist    | D3                                   |                     |                    | Pilla, M. et al., Selective inhibition of cocaine-seeking behaviour by a partial dopamine D3 receptor agonist. NMR Shift Reagents 400, 371 (1999)                                                                        |
| 03       | A07           | B-102  | 31677-93-7  | 276.21                | Bupropion hydrochloride                 | (±)-1-(3-Chlorophenyl)-2-[(1,1-dimethylethylamino)-1-propanone hydrochloride | Dopamine        |        | Blocker    | Reuptake                             | Yes                 | 312 mg/ml          | Cooper, B.R., et al., Behavioral and biochemical effects of the antidepressant bupropion (Wellbutrin): evidence for selective blockade of dopamine uptake in vivo J. Pharmacol. Exp. Ther. 215, 127-134 (1980)           |
| 03       | A08           | B-154  |             | 233.70                | BU224 hydrochloride                     | 2-(4,5-Dihydroimidazol-2-yl)-quinoline hydrochloride                         | Imidazoline     |        | Antagonist | I2                                   | Yes                 | >16 mg/ml          | Diaz, A., et al., BU-224 produces spinal antinociception as an agonist at imidazoline I2 receptors. Eur. J. Pharmacol. 333, 9-15 (1997)                                                                                  |
| 03       | A09           | C 0330 | 52214-84-3  | 289.16                | Ciprofibrate                            | 2-[p-(2,2-Dichlorocyclopropyl)phenoxy]-2-methylpropanoic acid                | Transcription   |        | Ligand     | PPAR-alpha                           |                     |                    | Goll et al., Comparison of the effects of various peroxisome proliferators on peroxisomal enzyme activities, DNA synthesis, and apoptosis in rat and human hepatocyte cultures. Toxicol. Appl. Pharmacol. 160, 21 (1999) |
| 03       | A10           | C 0862 |             | 292.47                | CGP-7930                                | 3-(3',5'-Di-tert-butyl-4'-hydroxy)phenyl-2,2-dimethylpropanol                | GABA            |        | Modulator  | GABA-B                               |                     |                    | Urwyler, S. et al., Mol. Pharmacol. 60, 963-971 (2001)                                                                                                                                                                   |
| 03       | A11           | C 1671 | 6469-93-8   | 352.33                | Chlorprothixene hydrochloride           | 2-Chloro-9-(3-dimethylaminopropylidene)thioxanthene hydrochloride            | Dopamine        |        | Antagonist | D2                                   |                     |                    | Fromowitz, M., and Cody, V., Biologically active conformers of phenothiazines and thioxanthenes. Further evidence for a ligand model of dopamine D2 receptor antagonists. J. Med. Chem. 36, 2219-2227 (1993)             |
| 03       | B02           | B 2134 | 22260-51-1  | 750.72                | (+)-Bromocriptine methanesulfonate      |                                                                              | Dopamine        |        | Agonist    | D2                                   | Yes                 | 0.8 mg/ml          | Velasco, M. and Luchsinger, A., Dopamine: pharmacologic and therapeutic aspects. Am. J. Ther. 5, 37-43 (1996)                                                                                                            |
| 03       | B03           | B 3501 | 590-46-5    | 153.61                | Betaine hydrochloride                   |                                                                              | Biochemistry    | Enzyme | Metabolite |                                      |                     |                    | Zhu X.M., et al., J Neurosci Res. 2004 Aug 1;77(3):402-9                                                                                                                                                                 |
| 03       | B04           | S 7067 | 152121-30-7 | 331.35                | SB 202190                               | 4-[4-(4-Fluorophenyl)-5-(4-pyridinyl)-1H-imidazol-2-yl]phenol                | Phosphorylation | Enzyme | Inhibitor  | p38 MAPK                             |                     |                    | Fox, T., et al, A single amino acid substitution makes ERK2 susceptible to pyridinyl imidazole inhibitors of p38 MAP kinase. Protein Sci. 7, 2249-2255 (1998)                                                            |
| 03       | B05           | B 7777 | 51333-22-3  | 430.55                | Budesonide                              | 16,17-Butylidenebis(oxy)-11,21-dihydroxypregna-1,4-diene-3,20-dione          | Hormone         |        |            | Cortisol                             |                     |                    | Wattenberg L.W., et al., Cancer Res. 57, 5489-92 (1997)                                                                                                                                                                  |
| 03       | B06           | B 9647 | 69304-47-8  | 333.14                | (E)-5-(2-Bromovinyl)-2'-deoxyuridine    | BVdU                                                                         | Immune System   |        | Inhibitor  | HSV1                                 |                     |                    | DeClercq, E.D., J. Med. Chem. 29, 213 (1986)                                                                                                                                                                             |
| 03       | B07           | B-103  | 66016-70-4  | 462.30                | (-)-Bicuculline methbromide, 1(S), 9(R) |                                                                              | GABA            |        | Antagonist | GABA-A                               | Yes                 |                    | Avoli, M., et al., Functional and pharmacological properties of GABA-mediated inhibition in the human neocortex. Can. J. Physiol. Pharmacol. 75, 526-534 (1997)                                                          |
| 03       | B08           | B-161  | 36067-72-8  | 254.16                | B-HT 933 dihydrochloride                | Azepexole dihydrochloride                                                    | Adrenoceptor    |        | Agonist    | alpha2                               | Yes                 | >20 mg/ml          | Nielson, et al., Calcium utilization coupled to stimulation of post junctional alpha-1 and alpha-2 adrenoceptors in isolated human resistance arteries J. Pharmacol. Exp. Ther. 260, 637-643 (1992)                      |
| 03       | B09           | C 0331 | 6376274-3   | 266.73                | 6-Chloromelatonin                       | N-Acetyl-6-chloro-5-methoxytryptamine                                        | Melatonin       |        | Agonist    |                                      |                     |                    | Persengiev, S.P., 2-(125I)-Iodometatonin binding sites in rat adrenals: pharmacological characteristics and subcellular distribution. Life Sci. 51, 647 (1992)                                                           |
| 03       | B10           | C 0987 |             | 290.45                | CGP-13501                               | 3-(3',5'-Di-tert-butyl-4'-hydroxy)phenyl-2,2-dimethylpropanal                | GABA            |        | Modulator  | GABA-B                               |                     |                    | Urwyler, S. et al., Mol. Pharmacol. 60, 963-971 (2001)                                                                                                                                                                   |
| 03       | B11           | C 1754 | 1927--06-6  | 184.08                | Choline bromide                         | Choline-methyl-13C bromide                                                   | Cholinergic     | Enzyme | Substrate  | Choline acetyltransferase            |                     |                    | Jimenez, B., et al., Occurrence, co-occurrence and topographic distribution of choline acetyl transferase, met-enkephalin and neurotensin in the stellate ganglion of the cat. Synapse 43, 163 (2002)                    |
| 03       | C02           | B 2292 | 19916-73-5  | 241.25                | O6-benzylguanine                        |                                                                              | DNA Repair      | Enzyme | Inhibitor  | O6-alkylguanine-DNA alkyltransferase |                     |                    | G. Mitra, et al., Proc. Natl. Acad. Sci. USA 86, 8650-8654 (1989)                                                                                                                                                        |
| 03       | C03           | B 3650 | 7758-31-8   | 137.61                | Betaine aldehyde chloride               | (Formylmethyl)trimethylammonium chloride                                     | Cholinergic     | Enzyme | Metabolite | Choline dehydrogenase                |                     |                    | Incharoensakdi A, et al. J Biochem Mol Biol Biophys. 2002 Aug;6(4):243-8                                                                                                                                                 |
| 03       | C04           | B 5681 | 196309-76-9 | 249.33                | Bay 11-7085                             | (E)-3-(4-t-Butylphenylsulfonyl)-2-propenenitrile                             | Cell Cycle      |        | Inhibitor  | Ikb-alpha                            | Insoluble           |                    | Pierce, J.W., et al., J. Biol. Chem. 272, 21096 (1997)                                                                                                                                                                   |

| Rack No. | Rack Position | CATNUM | CAS number  | Mol. Weight Structure | Name                                 | Secondary Name                                                                                          | Class              | Enzyme | Action       | Selectivity                | Solubility in Water | Solubility in DMSO     | Reference                                                                                                                                                                                                                                 |
|----------|---------------|--------|-------------|-----------------------|--------------------------------------|---------------------------------------------------------------------------------------------------------|--------------------|--------|--------------|----------------------------|---------------------|------------------------|-------------------------------------------------------------------------------------------------------------------------------------------------------------------------------------------------------------------------------------------|
| 03       | C05           | B 7880 | 76939-46-3  | 430.09                | 8-Bromo-cAMP sodium                  | 8-Bromoadenosine-3',5'-cyclophosphate sodium                                                            | Cyclic Nucleotides | Enzyme | Activator    |                            | Yes                 | 100 mg/ml              | Meyer, R.B. Jr., and Miller, J.P., Analogs of cyclic AMP and cyclic GMP: general methods of synthesis and the relationship of structure to enzymic activity. Life Sci. 14, 1019-1040 (1974)                                               |
| 03       | C06           | B 9929 |             | 443.42                | BRL 15572                            | 4-(3-Chlorophenyl)-alpha-(diphenylmethyl)-1-piperazineethanol hydrochloride                             | Serotonin          |        | Antagonist   | 5-HT1D                     | Yes                 | 5.0 mg/ml with heating | Price, G.W., et al., Naunyn-Schmiedeberg's Arch. Pharmacol. 356, 312-320 (1997)                                                                                                                                                           |
| 03       | C07           | B-112  | 93468-89-4  | 356.30                | (±)-Bay K 8644                       | 1,4-Dihydro-2,6-dimethyl-5-nitro-4-[2-(trifluoromethyl)-phenyl]-3-pyridine carboxylic acid methyl ester | Ca2+ Channel       |        | Agonist      | L-type                     | Insoluble           |                        | Guppy, L.J., Littleton, J.M., J. Cardiovasc. Pharmacol. 34, 480 (1999)                                                                                                                                                                    |
| 03       | C08           | B-168  | 36504-94-6  | 397.99                | (±)-Butaclamol hydrochloride         | AY 23028                                                                                                | Dopamine           |        | Antagonist   | D2>D1                      |                     |                        | Lippman, et al., Effect of butaclamol and its enantiomers upon striatal homovanillic acid and adenylyl cyclase of olfactory tubercle in rats. Life Sci. 16, 213-224 (1975)                                                                |
| 03       | C09           | C 0400 | 154-93-8    | 214.05                | Carmustine                           | BCNU; 1,3-Bis(2-chloroethyl)-1-nitrosourea                                                              | DNA                |        | Intercalator |                            |                     |                        | Stahl, et al., Chem. Res. Toxicol. 5, 106 (1992)                                                                                                                                                                                          |
| 03       | C10           | C 1112 | 83002-04-4  | 376.58                | CP55940                              | 5-(1,1-dimethylheptyl)-2-[5-hydroxypropyl]cyclohexyl]phenol                                             | Cannabinoid        |        | Agonist      |                            | Slightly Soluble    |                        | Thomas, B.F. et al., J. Pharm. Exp. Ther., 285, 285-292 (1998), J. Pharmacol. Exp. Ther. 285, 285-292 (1998)                                                                                                                              |
| 03       | C11           | C 2137 |             | 707.25                | Ceramide                             |                                                                                                         | Phosphorylation    | Enzyme | Inhibitor    | Diacylglycerol kinase      |                     |                        | Morrison, W.R., Polar lipids in bovine milk. I. Long-chain bases in sphingomyelin Biochim. Biophys. Acta 176, 537-546 (1969)                                                                                                              |
| 03       | D02           | B 2377 | 79-15-2     | 137.96                | N-Bromoacetamide                     | NBA                                                                                                     | Na+ Channel        |        | Modulator    |                            |                     |                        | Huang R.C., Mol Pharmacol. 1995 Sep;48(3):451-8                                                                                                                                                                                           |
| 03       | D03           | B 4555 |             | 320.37                | Benzazoline oxalate                  | 4,5-Dihydro-2-(2-naphthalenyl)-1H-imidazole oxalate                                                     | Imidazoline        |        | Agonist      | I2                         | Yes                 | < 8.0 mg/ml            | Pignini, M. et al., Bioorg. Med. Chem. 5(5), 833-841 (1997)                                                                                                                                                                               |
| 03       | D04           | B 5683 |             | 343.90                | Betaxolol hydrochloride              |                                                                                                         | Adrenoceptor       |        | Antagonist   | beta1                      | Yes                 | 36 mg/ml               | Giudicelli, J.F. et al., Br. J. Pharmacol. 10, 41-49 (1980)                                                                                                                                                                               |
| 03       | D05           | B 8262 | 132-17-2    | 403.54                | Benztropine mesylate                 |                                                                                                         | Cholinergic        |        | Antagonist   | Muscarinic                 | Yes                 | 50 mg/ml               | Bolden, C., et al., Antagonism by antimuscarinic and neuroleptic compounds at the five cloned human muscarinic cholinergic receptors expressed in Chinese hamster ovary cells J. Pharmacol. Exp. Ther. 260, 576-580 (1992)                |
| 03       | D06           | B-003  | 98086-36-3  | 408.59                | Chloroethylclonidine dihydrochloride | CEC dihydrochloride                                                                                     | Adrenoceptor       |        | Antagonist   | alpha1B                    | Yes                 | 12 mg/ml               | Leclerc, G., et al., Studies on some para-substituted clonidine derivatives that exhibit ana-adrenoceptor stimulant activity Br. J. Pharmacol. 71, 5-9 (1980)                                                                             |
| 03       | D07           | B-121  | 17139-54-7  | 305.01                | Bromoacetylcholine bromide           | 2-(2-Bromoacetyloxy)-N,N,N-trimethylethanaminium bromide                                                | Cholinergic        |        | Ligand       |                            | Yes                 |                        | Chiou, et al., Acetylcholinesterase hydrolysis of halogen substituted acetylcholines Biochem. Pharmacol. 17, 805 (1968)                                                                                                                   |
| 03       | D08           | B-169  | 127299-93-8 | 385.83                | BRL 37344 sodium                     | (±)-(R*,R*)-[4-[2-[(2-(3-Chlorophenyl)-2-hydroxyethyl)amino]propyl]phenoxy]-acetic acid sodium          | Adrenoceptor       |        | Agonist      | beta3                      | Yes                 | 10 mg/ml               | Oriowo, M.A., et al., The selectivity in vitro of the stereoisomers of the beta3 adrenoceptor agonist BRL 37344 J. Pharmacol. Exp. Ther. 277, 22 (1996)                                                                                   |
| 03       | D09           | C 0424 | 85532-75-8  | 352.87                | PK 11195                             | 1-(2-Chlorophenyl)-N-methyl-N-(1-methylpropyl)                                                          | GABA               |        | Antagonist   | Benzodiazepine             |                     |                        | Okubo, M. and Kawaguchi, M., Inhibitory regulation of amylase release in rat parotid acinar cells by benzodiazepine receptors Eur. J. Pharmacol. 359, 243-249 (1998)                                                                      |
| 03       | D10           | C 1159 | 339-72-0    | 102.09                | L-Cycloserine                        | (S)-4-Amino-3-isoxazolidone                                                                             | Sphingolipid       | Enzyme | Inhibitor    | Ketosphinganine synthetase |                     |                        | Biswas S, et al. Neurosci Lett. 2003 Aug 14;347(1):33-6                                                                                                                                                                                   |
| 03       | D11           | C 2235 | 21919-05-1  | 252.19                | CB 1954                              | 5-(1-Aziridinyl)-2,4-dinitrobenzamide                                                                   | DNA                |        | Intercalator |                            |                     |                        | Knox, R.J., et al., Bioactivation of 5-(aziridin-1-yl)-2,4-dinitrobenzamide (CB 1954) by human NAD(P)H quinone oxidoreductase 2: a novel co-substrate-mediated antitumor prodrug therapy Cancer Res. 60, 4179 (2000)                      |
| 03       | E02           | B 2390 | 980-71-2    | 435.32                | (±)-Brompheniramine maleate          |                                                                                                         | Histamine          |        | Antagonist   | H1                         |                     |                        | Sorbo, J., et al., Mast-cell histamine is angiogenic through receptors for histamine 1 and histamine 2. Int. J. Exp. Pathol. 75, 43 (1994)                                                                                                |
| 03       | E03           | B 4558 | 134470-38-5 | 316.34                | BWB70C                               | N-[3-[3-(4-Fluorophenoxy)phenyl]-1-methyl-2-propenyl]-N-hydroxyurea                                     | Leukotriene        | Enzyme | Inhibitor    | 5-lipoxygenase             |                     |                        | Yeadon, M., et al., Effect of BW 70C, a novel inhibitor of arachidonic acid 5-lipoxygenase, on allergen-induced bronchoconstriction and late-phase long eosinophil accumulation in sensitized guinea pigs. AMA Arch. Pathol. 38, 8 (1993) |
| 03       | E04           | B 6506 | 1670-40-0   | 156.62                | Benzamide hydrochloride              | Amidinobenzene hydrochloride                                                                            | Biochemistry       | Enzyme | Inhibitor    | Peptidase                  |                     |                        | Jeffcoate, S.L. and White, N., J. Clin. Endocrinol. Metab. 38, 155 (1974)                                                                                                                                                                 |

| Rack No. | Rack Position | CATNUM | CAS number  | Mol. Weight Structure | Name                                 | Secondary Name                                                                               | Class                 | Enzyme | Action     | Selectivity            | Solubility in Water | Solubility in DMSO | Reference                                                                                                                                                                                                                                                       |
|----------|---------------|--------|-------------|-----------------------|--------------------------------------|----------------------------------------------------------------------------------------------|-----------------------|--------|------------|------------------------|---------------------|--------------------|-----------------------------------------------------------------------------------------------------------------------------------------------------------------------------------------------------------------------------------------------------------------|
| 03       | E05           | B 8279 | 29925-17-5  | 278.35                | Ro 20-1724                           | 4-[(3-Butoxy-4-methoxyphenyl)methyl]-2-imidazolidione                                        | Cyclic Nucleotides    | Enzyme | Inhibitor  | cAMP phosphodiesterase | Insoluble           |                    | Begstrand, H., et al., Mol. Pharmacol. 13, 38 (1977)                                                                                                                                                                                                            |
| 03       | E06           | B-012  | 70952-50-0  | 223.63                | 6-Fluoronorepinephrine hydrochloride | 6-FNE hydrochloride                                                                          | Adrenoceptor          |        | Agonist    | alpha                  | Yes                 |                    | Cantacuzene, et al., Effect of fluorine substitution on the agonist specificity of norepinephrine. Science 204, 1217 (1979)                                                                                                                                     |
| 03       | E07           | B-134  | 21102-95-4  | 458.43                | BMY 7378 dihydrochloride             | 8-[2-[4-(2-Methoxyphenyl)-1-piperazinyl]ethyl]azaspiro[4.5]decane-7,9-dione dihydrochloride  | Serotonin             |        | Agonist    | 5-HT1A                 | Yes                 |                    | Yocca, F.D., et al., BMY 7378 a buspirone analog with high affinity selectivity and low intrinsic activity at the 5-HT1A receptor in rat and guinea pig hippocampal membranes Eur. J. Pharmacol. 137, 293 (1987)                                                |
| 03       | E08           | B-173  |             | 346.39                | BRL 54443 maleate                    | 3-(1-Methylpiperidin-4-yl)-1H-indol-5-ol maleate                                             | Serotonin             |        | Agonist    | 5-HT1E/1F              | Yes                 | 50 mg/ml           | Lightowler, et al., Effect of BRL 54443 (3-(1-methylpiperidin-4-yl)-1H-indol-5-ol) a 5-HT1E/1F receptor agonist on general behaviour and maximal electroshock seizure threshold in the rat Br. J. Pharmacol. 123, 237P (1998)                                   |
| 03       | E09           | C 0625 | 331-39-5    | 180.16                | Caffeic Acid                         | 3,4-Dihydroxycinnamic acid                                                                   | Cell Stress           |        | Inhibitor  | Antioxidant            |                     |                    | Koshihara, Y., et al., Selective inhibition of 5-lipoxygenase by natural compounds isolated from Chinese plants Artemisia rubripes Nakai. FEBS Lett. 158, 41-44 (1983)                                                                                          |
| 03       | E10           | C 1172 | 105637-50-1 | 361.29                | ML-9                                 |                                                                                              | Phosphorylation       | Enzyme | Inhibitor  | MLCK                   |                     |                    | Saitoh, M., et al., Selective inhibition of catalytic activity of smooth muscle myosin light chain kinase. J. Biol. Chem. 262, 7796-7801 (1987)                                                                                                                 |
| 03       | E11           | C 2321 | 56879-53-1  | 255.15                | Carcinine dihydrochloride            | beta-Alanylisthamine dihydrochloride                                                         | Cell Stress           |        | Inhibitor  | Antioxidant            |                     |                    | Flanbaum, L., et al., Life Sci. 47, 1587 (1990)                                                                                                                                                                                                                 |
| 03       | F02           | B 2417 | 2898-76-2   | 356.22                | Benzamil hydrochloride               | N-(Benzylamido)-3,5-diamino-6-chloropyrazinecarboxamide hydrochloride                        | Ion Pump              |        | Blocker    | Na+/H+, Na+/Ca2+ Pump  |                     |                    | Lane, J.W., et al., Br. J. Pharmacol. 106, 283 (1992)                                                                                                                                                                                                           |
| 03       | F03           | B 5002 | 59-14-3     | 307.10                | 5-Bromo-2'-deoxyuridine              | Br-dU; 5-Bromo-1-(2-deoxy-beta-D-ribofuranosyl)uracil                                        | DNA Metabolism        |        | Inhibitor  |                        |                     |                    | Boccadoro, M., et al., Tumor 72, 135 (1986)                                                                                                                                                                                                                     |
| 03       | F04           | B 7005 | 378-44-9    | 392.47                | Betamethasone                        | 9alpha-Fluoro-16beta-methylprednisolone                                                      | Hormone               |        |            | Glucocorticoid         |                     |                    | Edwards L.A., et al., J Pharmacol Exp Ther. 1995 Aug;27(2):1025-32                                                                                                                                                                                              |
| 03       | F05           | B 8385 | 65391-42-6  | 344.84                | Bestatin hydrochloride               | N-[(2S,3R)-3-Amino-2-hydroxy-4-phenylbutyl]-L-leucine hydrochloride                          | Biochemistry          | Enzyme | Inhibitor  | Aminopeptidase         |                     |                    | Umezawa, H., et al., J. Antibiot. 29, 97, 100-99, 101 (1976)                                                                                                                                                                                                    |
| 03       | F06           | B-015  |             | 481.48                | Bromoacetyl alprenolol menthane      |                                                                                              | Adrenoceptor          |        | Antagonist | beta                   | Insoluble           |                    | Pitha et al., Regeneration of beta-adrenergic receptors in senescent rats: A study using an irreversible binding antagonist. Proc. Natl. Acad. Sci. USA 79, 4424 (1982)                                                                                         |
| 03       | F07           | B-135  |             | 455.19                | R(+)-6-Bromo-APB hydrobromide        | R(+)-6-Bromo-7,8-dihydroxy-3-allyl-1-phenyl-2,3,4,5-tetrahydro-1H-3-benzazepine hydrobromide | Dopamine              |        | Agonist    | D1/D5                  |                     |                    | Neumeyer, et al., Stereoisomeric probes for the D1 dopamine receptor: Synthesis and characterization of R(+) and S(-) enantiomers of 3-allyl-7,8-dihydroxy-1-phenyl-2,3,4,5-tetrahydro-1H-3-benzazepine and its 6-bromo analogue. J. Med. Chem. 35, 1466 (1992) |
| 03       | F08           | B-175  |             | 322.86                | BW 723C86                            |                                                                                              | Serotonin             |        | Agonist    | 5-HT2B                 | Yes                 | 5.6 mg/ml          | Kennett, G.A., et al., Effects of the 5HT2B receptor agonist BW 723C86 on three rat models of anxiety Br. J. Pharmacol. 117, 1443-1448 (1996)                                                                                                                   |
| 03       | F09           | C 0737 |             | 369.47                | Cilostazol                           | OPC 13013; OPC 21; Pletaal                                                                   | Cyclic Nucleotides    | Enzyme | Inhibitor  | PDE III                |                     |                    | Cone, J., et al., Comparison of the effects of cilostazol and milrinone on intracellular cAMP levels and cellular function in platelets and cardiac cells. J. Cardiovasc. Pharmacol. 34, 497-504 (1999)                                                         |
| 03       | F10           | C 1251 | 225937-10-0 | 290.28                | (+)-Catechin Hydrate                 | (+)-Cyanidol-3                                                                               | Cell Stress           |        | Inhibitor  | Antioxidant            |                     |                    | Ueda, J., A comparison of scavenging abilities of antioxidants against hydroxyl radicals Arch. Biochem. Biophys. 333, 377-384 (1996)                                                                                                                            |
| 03       | F11           | C 2505 | 50-22-6     | 346.47                | Corticosterone                       | Kendall's Compound B; 4-Pregnene-11beta,21-diol-3,20-dione; Reichstein's Substance H         | Hormone               |        |            | Glucocorticoid         |                     |                    | Parrillo, J. E., and Fauci, A.S., Mechanisms of glucocorticoid action on immune processes Ann. Rev. Pharmacol. Toxicol. 19, 179-201 (1979)                                                                                                                      |
| 03       | G02           | B 2515 | 83730-53-4  | 222.31                | L-Buthionine-sulfoximine             |                                                                                              | Multi-Drug Resistance | Enzyme | Inhibitor  |                        |                     |                    | Chen, X., et al., Potential for selective modulation of glutathione in cancer chemotherapy. Chem. Biol. Interact. 111-112, 263-275 (1998)                                                                                                                       |
| 03       | G03           | B 5016 | 74764-40-2  | 403.01                | Bepiridil hydrochloride              |                                                                                              | Ca2+ Channel          |        | Blocker    |                        |                     |                    | Li, Y., et al., J. Pharmacol. Exp. Ther. 291, 562 (1999)                                                                                                                                                                                                        |

| Rack No. | Rack Position | CATNUM | CAS number  | Mol. Weight Structure | Name                                                      | Secondary Name                                                                             | Class                 | Enzyme | Action       | Selectivity       | Solubility in Water | Solubility in DMSO | Reference                                                                                                                                                                                                                                     |
|----------|---------------|--------|-------------|-----------------------|-----------------------------------------------------------|--------------------------------------------------------------------------------------------|-----------------------|--------|--------------|-------------------|---------------------|--------------------|-----------------------------------------------------------------------------------------------------------------------------------------------------------------------------------------------------------------------------------------------|
| 03       | G04           | B 7148 | 33386-08-2  | 421.97                | Buspiron hydrochloride                                    |                                                                                            | Serotonin             |        | Agonist      | 5-HT1A            |                     |                    | Tunnicliff, G., Molecular basis of buspirone's anxiolytic action. Pharmacol. Toxicol. 69, 149 (1991)                                                                                                                                          |
| 03       | G05           | B 8406 | 61-75-6     | 414.36                | Bretilium tosylate                                        | 2-Bromo-N-ethyl-N,N-dimethylbenzenemethanaminium 4-methyl-benzenesulfonate                 | Adrenoceptor          |        | Blocker      |                   | Yes                 | 50 mg/ml           | Anderson, J.L., Bretilium tosylate: profile of the only available class III antiarrhythmic agent. Clin. Ther. 7, 205-224 (1985)                                                                                                               |
| 03       | G06           | B-016  | 92642-97-2  | 397.92                | Benoxathian hydrochloride                                 | 2-[[[2-(2,6-dimethoxyphenoxy)ethyl]amino]methyl]-1,4-benzoxathian hydrochloride            | Adrenoceptor          |        | Antagonist   | alpha1            | Yes                 |                    | Melchiorre, C., et al., 2-[[[2-(2,6-dimethoxyphenoxy)ethyl]amino]methyl]-1,4-benzoxathian: A new antagonist with high potency and selectivity toward alpha1-adrenoreceptors. J. Med. Chem. 27, 1535 (1984)                                    |
| 03       | G07           | B-138  | 112726-66-6 | 335.94                | BTCP hydrochloride                                        |                                                                                            | Dopamine              |        | Blocker      | Reuptake          | Yes                 | > 180 mg/ml        | Vignon, J., et al., [3H]N-[1-(2-benzo(b)-thiophenyl)cyclohexyl]piperidine ([3H]BTCP): A new phencyclidine analog selective for the dopamine uptake complex Eur. J. Pharmacol. 148, 427-436 (1988)                                             |
| 03       | G08           | C 0253 | 305-03-3    | 304.22                | Chlorambucil                                              | 4-[Bis(2-chloroethyl)amino]benzenebutyric acid                                             | DNA                   |        | Intercalator |                   |                     |                    | Morabito, F., et al., Bcl-2 protein expression and p53 gene mutation in chronic lymphocytic leukemia: correlation with in vitro sensitivity to chlorambucil and purine analogs Haematologica 82, 16-20 (1997)                                 |
| 03       | G09           | C 0750 | 58-08-2     | 194.19                | Caffeine                                                  | 1,3,7-Trimethylxanthine                                                                    | Adenosine             | Enzyme | Inhibitor    | Phosphodiesterase | Yes                 | 15 mg/ml           | Poe, B.S., and O'Neill, K.L., Caffeine modulates heat shock induced apoptosis in the human promyelocytic leukemia cell line HL-60 Cancer Lett. 121, 1-6 (1997)                                                                                |
| 03       | G10           | C 1290 | 94-20-2     | 276.74                | Chlorpropamide                                            |                                                                                            | Hormone               |        | Releaser     | Insulin           |                     |                    | Nunes FB, et al. Pharmacol Res. 2004 May;49(5):449-53                                                                                                                                                                                         |
| 03       | G11           | C 2538 | 41575-94-4  | 371.26                | Carboplatin                                               | cis-Diammine(1,1-cyclobutanedicarboxylato)platinum                                         | DNA                   |        | Intercalator |                   |                     |                    | Oguri, T., et al., The Kruppel-type zinc finger family gene HKR1 is induced in lung cancer by exposure to platinum drugs Gene 222, 61-67 (1998)                                                                                               |
| 03       | H02           | B 2640 | 5072-26-4   | 222.31                | DL-Buthionine-[S,R]-sulfoximine                           |                                                                                            | Multi-Drug Resistance | Enzyme | Inhibitor    |                   |                     |                    | Fruehauf JP, et al. Cell Biol. Int. 111-112, 277-305 (1998)                                                                                                                                                                                   |
| 03       | H03           | B 5275 | 2931-03-9   | 435.32                | (+)-Brompheniramine maleate                               | Dexbrompheniramine maleate                                                                 | Histamine             |        | Antagonist   | H1                |                     |                    | Sorbo, J., et al., Mast-cell histamine is angiogenic through receptors for histamine 1 and histamine 2. Int. J. Exp. Pathol. 75, 43 (1994)                                                                                                    |
| 03       | H04           | B 7283 | 14919-77-8  | 293.71                | Benserazide hydrochloride                                 | DL-Serine, 2-[[[2,4-trihydroxyphenyl)methyl]hydrazide hydrochloride                        | Biochemistry          | Enzyme | Inhibitor    | Decarboxylase     | Yes                 | 10 mg/ml           | Dingemans, J., et al., Br J Clin Pharmacol. 1997 Jul;44(1):41-8                                                                                                                                                                               |
| 03       | H05           | B 9130 | 485-49-4    | 367.36                | (+)-Bicuculline                                           |                                                                                            | GABA                  |        | Antagonist   | GABA-A            |                     |                    | Johnson, S.W., Seutin, V., Bicuculline methiodide potentiates NMDA-dependent burst firing in rat dopamine neurons by blocking apamin-sensitive Ca2+-activated K+ currents. Neurosci. Lett. 231, 13 (1997)                                     |
| 03       | H06           | B-019  | 63-92-3     | 340.30                | Phenoxybenzamine hydrochloride                            |                                                                                            | Adrenoceptor          |        | Blocker      | alpha             | Slightly Soluble    |                    | Kalsner, S., Is there feedback regulation of neurotransmitter release by autoreceptors? Biochem. Pharmacol. 34, 4085-4097 (1985)                                                                                                              |
| 03       | H07           | B-152  |             | 398.42                | N6-Benzyl-5'-N-ethylcarboxamidoadenosine                  | N6-Benzyl-NECA                                                                             | Adenosine             |        | Agonist      | A3                |                     |                    | Fozard, et al., Adenosine A3 receptors mediate hypotension in the angiotensin II-supported circulation of the pithed rat Br. J. Pharmacol. 109, 3-5 (1993)                                                                                    |
| 03       | H08           | C 0256 | 33818-15-4  | 497.29                | Citicoline sodium                                         | CDP-choline; Citidine (5')-diphosphocholine sodium                                         | Lipid                 | Enzyme | Inhibitor    | PLA2              | Yes                 | 100 mg/ml          | Schabitz, et al., The effects of prolonged treatment with citicoline in temporary experimental focal ischemia J. Neurol. Sci. 38, 21-25 (1996)                                                                                                |
| 03       | H09           | C 0768 | 6055-19-2   | 261.09                | Cyclophosphamide monohydrate                              | 2-[Bis(2-chloroethyl)amino]tetrahydro-2H-1,3,2-oxazaphosphorine 2-oxide                    | DNA                   |        | Intercalator |                   |                     |                    | Inagawa, H., et al., Mechanisms by which chemotherapeutic agents augment the antitumor effects of tumor necrosis factor: involvement of the pattern shift of cytokines from Th2 to Th1 in tumor lesions. Anticancer Res. 18, 3957-3964 (1998) |
| 03       | H10           | C 1610 |             | 343.81                | 1-(4-Chlorobenzyl)-5-methoxy-2-methylindole-3-acetic acid |                                                                                            | Multi-Drug Resistance |        | Inhibitor    | MRP1              | Insoluble           |                    | Maguire, A.R., Synthesis of indomethacin analogues for evaluation as modulators of MRP activity. Bioorg. Med. Chem. 9, 745 (2001)                                                                                                             |
| 03       | H11           | C 2755 | 53-06-5     | 360.45                | Cortisone                                                 | Kendall's Compound E; 4-Pregnene-17alpha,21-diol-3,11,20-trione; Reichstein's Substance Fa | Hormone               |        |              | Corticosteroid    |                     |                    | Stewart, P.M., et al., Horm Res. 2001;56 suppl 1:1-6                                                                                                                                                                                          |

| Rack No. | Rack Position | CATNUM | CAS number  | Mol. Weight Structure | Name                                                     | Secondary Name                                                                                      | Class           | Enzyme | Action     | Selectivity             | Solubility in Water | Solubility in DMSO | Reference                                                                                                                                                                                                                                             |
|----------|---------------|--------|-------------|-----------------------|----------------------------------------------------------|-----------------------------------------------------------------------------------------------------|-----------------|--------|------------|-------------------------|---------------------|--------------------|-------------------------------------------------------------------------------------------------------------------------------------------------------------------------------------------------------------------------------------------------------|
| 04       | A02           | C 2932 | 3895-92-9   | 383.83                | Chelerythrine chloride                                   | 1,2-Dimethoxy-N-methyl(1,3)benzodioxolo(5,6-c)phenanthridinium chloride                             | Phosphorylation | Enzyme | Inhibitor  | PKC                     | Yes                 | 5.0 mg/ml          | Jarvis, W.D., et al., Induction of apoptotic DNA fragmentation and cell death in HL-60 human promyelocytic leukemia cells by pharmacological inhibitors of protein kinase C. <i>Cancer Res.</i> 54, 1707-1714 (1994)                                  |
| 04       | A03           | C 3662 | 59865-13-3  | 1202.64               | Cyclosporin A                                            | Antibiotic S 7481F1                                                                                 | Phosphorylation | Enzyme | Inhibitor  | Calcineurin phosphatase | Insoluble           |                    | Donjerkovic, et al., Regulation of p27Kip1 accumulation in murine B-lymphoma cells: role of c-Myc and calcium. <i>Cell. Growth Differ.</i> 10, 695-704 (1999)                                                                                         |
| 04       | A04           | C 4382 | 51-83-2     | 182.65                | Carbachol                                                | Carbamylcholine chloride                                                                            | Cholinergic     |        | Agonist    |                         | Yes                 | 1.0 mg/ml          | Yan, G.M., et al., Activation of muscarinic cholinergic receptors blocks apoptosis of cultured cerebellar granule neurons. <i>Mol. Pharmacol.</i> 47, 248-257 (1995)                                                                                  |
| 04       | A05           | C 4895 | 15686-71-2  | 347.40                | Cephalexin hydrate                                       |                                                                                                     | Antibiotic      |        |            | Cell wall synthesis     |                     |                    | Kennedy AR, et al. <i>Acta Crystallogr C.</i> 2003 Nov;59(Pt11):o650-2                                                                                                                                                                                |
| 04       | A06           | C 5554 | 65369-76-8  | 269.60                | 1-(3-Chlorophenyl)piperazine dihydrochloride             | m-CPP dihydrochloride                                                                               | Serotonin       |        | Agonist    | 5-HT1                   |                     |                    | Rotzinger, et al., Trazadone is metabolized to m-chlorophenylpiperazine by CYP3A4 from human source. <i>Drug Metab. Dispos.</i> 26, 572 (1998)                                                                                                        |
| 04       | A07           | C 6022 | 969-33-5    | 323.87                | Cyproheptadine hydrochloride                             |                                                                                                     | Serotonin       |        | Antagonist | 5-HT2                   | Yes                 |                    | Kimura, S., et al., Suppressive effects of antihistaminic and/or anti-PAF agents on passive anaphylactic shock in mice sensitized with allogeneic monoclonal IgE and IgG1 antibodies and hyperimmune serum <i>Immunol. Invest.</i> 27, 379-393 (1998) |
| 04       | A08           | C 6862 |             | 438.79                | CB34                                                     | N,N-Dipropyl-2-(4-chlorophenyl)-6,8-dichloro-imidazo[1,2-a]pyridine-3-acetamide                     | Benzodiazepine  |        | Ligand     |                         | Insoluble           |                    | Pisu, M.G. et al., <i>Eur. J. Pharmacol.</i> 432, 129-134 (2001)                                                                                                                                                                                      |
| 04       | A09           | C 7632 | 56-25-7     | 196.20                | Cantharidin                                              | Cantharidine                                                                                        | Phosphorylation | Enzyme | Inhibitor  | PP2A                    |                     |                    | Baskin, T.I., and Wilson J.E., Inhibitors of protein kinases and phosphatases alter root morphology and disorganize cortical microtubules. <i>Plant Physiol.</i> 113, 493-502 (1997)                                                                  |
| 04       | A10           | C 8138 | 69-09-0     | 355.33                | Chlorpromazine hydrochloride                             |                                                                                                     | Dopamine        |        | Antagonist |                         |                     |                    | Collier, H.B., <i>Clin. Biochem.</i> 7, 331 (1974)                                                                                                                                                                                                    |
| 04       | A11           | C 8773 | 3685-84-5   | 294.18                | Centrophoxine hydrochloride                              | Meclofenoxate hydrochloride                                                                         | Nootropic       |        |            |                         |                     |                    | al-Zuhair, H., et al., The effect of meclofenoxate with ginkgo biloba extract or zinc on lipid peroxide, some free radical scavengers and the cardiovascular system of aged rats. <i>Pharmacol. Res.</i> 38, 65-72 (1998)                             |
| 04       | B02           | C 3010 | 53-19-0     | 320.05                | 1-(2-Chlorophenyl)-1-(4-chlorophenyl)-2,2-dichloroethane | Mitotane                                                                                            | Hormone         |        | Inhibitor  | Corticosteroid          |                     |                    | Andersen, A., et al., <i>Ther. Drug Monit.</i> 21, 355 (1999)                                                                                                                                                                                         |
| 04       | B03           | C 3909 | 68-41-7     | 102.09                | D-Cycloserine                                            | R(+)-4-Amino-3-isoxazolidinone                                                                      | Glutamate       |        | Agonist    | NMDA-Glycine            |                     |                    | Watson, et al., D-Cycloserine acts as a partial agonist at the glycine modulatory site of the NMDA receptor expressed in <i>Xenopus</i> oocytes <i>Brain Res.</i> 510, 158-160 (1990)                                                                 |
| 04       | B04           | C 4397 | 95-25-0     | 169.57                | Chlorzoxazone                                            | 5-Chloro-2(3H)-benzoxazolone                                                                        | Nitric Oxide    | Enzyme | Inhibitor  | iNOS                    |                     |                    | Mizuno, D., et al., Chlorzoxazone: a probe drug whose metabolism can be used to monitor toluene exposure in rats. <i>Arch. Toxicol.</i> 74, 139-144 (2000)                                                                                            |
| 04       | B05           | C 4911 | 58-94-6     | 295.72                | Chlorothiazide                                           |                                                                                                     | Biochemistry    | Enzyme | Inhibitor  | Carbonic anhydrase      |                     |                    | Beyer, K.H., Hypertension. 1993 Sep;22(3):388-91                                                                                                                                                                                                      |
| 04       | B06           | S 0693 | 152239-46-8 | 286.36                | SB 204741                                                | N-(1-Methyl-1H-indo-5-yl)-N'-(3-methyl-5-isothiazolyl)urea                                          | Serotonin       |        | Antagonist | 5-HT2B                  |                     |                    | Knowles, I.D. and Ramage, A.G., <i>Br. J. Pharmacol.</i> 129, 177-183 (2000)                                                                                                                                                                          |
| 04       | B07           | C 6042 | 50908-62-8  | 320.31                | 5'-(N-Cyclopropyl)carboxamidoadenosine                   | CPCA                                                                                                | Adenosine       |        | Agonist    | A2                      | 1 mg/ml             |                    | Kang, M.J. et al., <i>Neurosci Lett.</i> 2003;344:57-61.                                                                                                                                                                                              |
| 04       | B08           | C 6895 | 53994-73-3  | 367.81                | Cefactor                                                 |                                                                                                     | Antibiotic      |        |            | Cell wall synthesis     |                     |                    | Sourgens, H., et al., <i>Int J Clin Pharmacol Ther.</i> 1997 Sep;35(9):374-80                                                                                                                                                                         |
| 04       | B09           | C 7861 | 59729-33-8  | 405.31                | Citalopram hydrobromide                                  | 1-[3-(Dimethylamino)propyl]-1-(4-fluorophenyl)-1,3-dihydro-5-isobenzofurancarbonitrile hydrobromide | Serotonin       |        | Inhibitor  | Reuptake                |                     |                    | Pollock, B.G., Citalopram: a comprehensive review. <i>Expert Opin. Pharmacother.</i> 2, 681 (2001)                                                                                                                                                    |
| 04       | B10           | C 8145 | 51521-93-9  | 554.54                | Cefsulodin sodium salt hydrate                           | Sulcephalosporin                                                                                    | Antibiotic      |        |            | Cell wall synthesis     |                     |                    |                                                                                                                                                                                                                                                       |
| 04       | B11           | C 8903 | 14976-57-9  | 459.97                | Clemastine fumarate                                      |                                                                                                     | Histamine       |        | Antagonist | H1                      |                     |                    | Akoev, G.N., et al., Mast cell mediators excite the afferents of cat small intestine. <i>Neuroscience</i> 71, 1163-1166 (1996)                                                                                                                        |

| Rack No. | Rack Position | CATNUM | CAS number  | Mol. Weight Structure | Name                                | Secondary Name                                                                                       | Class                 | Enzyme | Action     | Selectivity                                        | Solubility in Water | Solubility in DMSO | Reference                                                                                                                                                                                                                                       |
|----------|---------------|--------|-------------|-----------------------|-------------------------------------|------------------------------------------------------------------------------------------------------|-----------------------|--------|------------|----------------------------------------------------|---------------------|--------------------|-------------------------------------------------------------------------------------------------------------------------------------------------------------------------------------------------------------------------------------------------|
| 04       | C02           | C 3025 | 7054--11--7 | 390.87                | (±)-Chlorpheniramine maleate        |                                                                                                      | Histamine             |        | Antagonist | H1                                                 |                     |                    | Yoshida, T., et al., Histaminergic effect on apoptosis of rat small intestinal mucosa after ischemia-reperfusion Dig. Dis. Sci. 45, 1138-1144 (2000)                                                                                            |
| 04       | C03           | C 3912 | 93882-12-3  | 493.80                | 8-(4-Chlorophenylthio)-cAMP sodium  |                                                                                                      | Cyclic Nucleotides    | Enzyme | Activator  |                                                    | Yes                 | 25 mg/ml           | Connolly, B.J., et al., 8-(4-Chlorophenyl)thio-cyclic AMP is a potent inhibitor of the cyclic GMP-specific phosphodiesterase (PDE VA). Biochem. Pharmacol. 44, 2303-2306 (1992)                                                                 |
| 04       | C04           | C 4418 | 1115-65-7   | 153.16                | L-Cysteinesulfonic Acid             |                                                                                                      | Glutamate             |        | Ligand     |                                                    |                     |                    | Griffiths, R., Prog. Neurobiol. 35, 313 (1990)                                                                                                                                                                                                  |
| 04       | C05           | C 4915 | 2438-32-6   | 390.87                | (+)-Chlorpheniramine maleate        | (gammaS)-gamma-(4-Chlorophenyl)-N,N-dimethyl-2-pyridinepropanamine maleate                           | Histamine             |        | Antagonist | H1                                                 |                     |                    | Yoshida, T., et al., Histaminergic effect on apoptosis of rat small intestinal mucosa after ischemia-reperfusion Dig. Dis. Sci. 45, 1138-1144 (2000)                                                                                            |
| 04       | C06           | C 5793 | 104376-79-6 | 598.55                | Ceftriaxone sodium                  | Ro-13-9904/001                                                                                       | Antibiotic            |        |            | Cell wall synthesis                                |                     |                    | Perry, T.R., et al., Clin Pharmacokinet. 2001;40(9):685-94                                                                                                                                                                                      |
| 04       | C07           | C 6048 | 56796-39-5  | 493.52                | Cefmetazole sodium                  | CS-1170; SKF-83088                                                                                   | Antibiotic            |        |            | Cell wall synthesis                                |                     |                    | Schentag, J.J., Pharmacotherapy. 991;11(1):2-19                                                                                                                                                                                                 |
| 04       | C08           | C 7005 | 68-39-3     | 102.09                | DL-Cycloserine                      | 4-amino-3-isoxazolidinone                                                                            | Sphingolipid          | Enzyme | Inhibitor  | Ketosphinganine synthase, Alanine aminotransferase |                     |                    | Edmondson, J., Biochem. Biophys. Res. Comm. 76, 751 (1977)                                                                                                                                                                                      |
| 04       | C09           | C 7897 | 4205-91-8   | 266.56                | Clonidine hydrochloride             |                                                                                                      | Adrenoceptor          |        | Agonist    | alpha2                                             | Yes                 |                    | Eglen, R.M., et al., 'Seeing through a glass darkly': casting light on imidazoline's sites. Trends Pharmacol. Sci. 19, 381-390 (1998)                                                                                                           |
| 04       | C10           | C 8221 | 104594-70-9 | 284.31                | Caffeic acid phenethyl ester        | CAPE                                                                                                 | Cell Cycle            |        | Inhibitor  | NFkB                                               |                     |                    | Grunberger, D., et al., Preferential cytotoxicity on tumor cells by caffeic acid phenethyl ester isolated from propolis Experientia 44, 230-232 (1988)                                                                                          |
| 04       | C11           | C 9033 | 51887-89-9  | 160.00                | beta-Chloro-L-alanine hydrochloride |                                                                                                      | Biochemistry          | Enzyme | Inhibitor  | Alanine aminotransferase                           |                     |                    | Morino, Y., et al., J. Biol. Chem. 254, 279 (1979)                                                                                                                                                                                              |
| 04       | D02           | C 3130 | 50-04-4     | 402.49                | Cortisone 21-acetate                | 21-Acetoxy-4-pregnen-17alpha-ol-3,11,20-trione                                                       | Hormone               |        |            | Cortisol                                           |                     |                    | Stewart, P.M., et al., Horm Res. 2001;56 suppl 1:1-6                                                                                                                                                                                            |
| 04       | D03           | C 3930 | 57265-65-3  | 687.71                | Calmidazolium chloride              | R 24571 chloride                                                                                     | Intracellular Calcium | Enzyme | Inhibitor  | Ca2+ATPase                                         |                     |                    | Fischer, T.H., et al., An investigation of functional similarities between the sarcoplasmic reticulum and platelet calcium-dependent adenosinetriphosphatases with the inhibitors quercetin and calmidazolium Biochemistry 26, 8024-8030 (1987) |
| 04       | D04           | C 4479 | 715-91-3    | 299.35                | 9-cyclopentyladenine                | 9-CP-Ade                                                                                             | Cyclic Nucleotides    | Enzyme | Inhibitor  | Adenylate cyclase                                  | Yes                 | >100 mg/ml         | Johnson, R.A., Isozyme-dependent sensitivity of adenylyl cyclases to P-site mediated inhibition by adenine nucleosides and nucleoside 3'-polyphosphates. J. Biol. Chem. 272, 8962 (1997)                                                        |
| 04       | D05           | C 5020 | 27164-46-1  | 476.49                | Cefazolin sodium                    | Sodium CEZ; SKF-41558                                                                                | Antibiotic            |        |            | Cell wall synthesis                                |                     |                    | Poston, S.A., et al., Pharmacotherapy. 2004 May;24(5):668-72                                                                                                                                                                                    |
| 04       | D06           | C 5913 | 59-85-8     | 357.16                | 4-Chloromercuribenzoic acid         | 4-(Hydroxymercuri)benzoic acid                                                                       | Biochemistry          | Enzyme | Inhibitor  |                                                    |                     |                    | Hendriks, D., et al., Bichim Biophys Acta. 1990 Apr 23;1034(1):86-92                                                                                                                                                                            |
| 04       | D07           | C 6305 | 5786-21-0   | 326.83                | Clozapine                           | 8-Chloro-11-(4-methyl)-1-piperaziny]-5H-dibenzo[b,e][1,4]diazepine                                   | Dopamine              |        | Antagonist | D4 > D2,D3                                         |                     |                    | Van Tol, H.H.M., et al., Cloning of the gene for a human dopamine D4receptor with high affinity for the antipsychotic clozapine. Nature 350, 610-614 (1991)                                                                                     |
| 04       | D08           | C 7041 | 55-45-8     | 317.22                | McN-A-343                           | (4-Hydroxy-2-butynyl)-1-trimethylammonium-m-chlorocarbamate chloride                                 | Cholinergic           |        | Agonist    | M1                                                 | Yes                 |                    | Lambrecht, G., The design and pharmacology of novel selective muscarinic agonists and antagonists Life Sci. 56, 815 (1995)                                                                                                                      |
| 04       | D09           | C 7912 | 64485-93-4  | 477.45                | Cefotaxime sodium                   | Cefotaxim sodium                                                                                     | Antibiotic            |        |            | Cell wall synthesis                                |                     |                    | Shimamura, T., et al., J Biol Chem. 2002 Nov 29;277(48):46601-8                                                                                                                                                                                 |
| 04       | D10           | C 8270 | 24536-60-3  | 445.45                | Cephapirin sodium                   | BL-P-1322                                                                                            | Antibiotic            |        |            | Cell wall synthesis                                |                     |                    | Arvidsson, A., Br J Clin Pharmacol. 1983 Mar;15(3):339-46                                                                                                                                                                                       |
| 04       | D11           | C 9510 | 120-80-9    | 110.11                | Pyrocatechol                        | 1,2-Benzenediol; Catechol                                                                            | Cell Cycle            |        | Inhibitor  |                                                    |                     |                    | Margulies, L.J., et al., Biochim Biophys Acta. 1976 Jun 18;435(2):152-8                                                                                                                                                                         |
| 04       | E02           | C 3270 | 12567--06-5 | 478.78                | Cephalosporin C zinc salt           |                                                                                                      | Antibiotic            |        |            | Cell wall synthesis                                |                     |                    | Tollinck, C., et al., Adv Biochem Eng Biotechnol. 2004;86:1-45.                                                                                                                                                                                 |
| 04       | E03           | G 5918 |             | 393.51                | GR 113808                           | 1-Methyl-1H-indole-3-carboxylic acid, [1-[2-[(methylsulfonyl)amino]ethyl]-4-piperidinyl]methyl ester | Serotonin             |        | Antagonist | 5-HT4                                              |                     |                    | Tuladhar, B.R., et al., Br. J. Pharmacol. 136, 150-156 (2002)                                                                                                                                                                                   |
| 04       | E04           | C 4520 | 58-71-9     | 418.43                | Cephalothin sodium                  |                                                                                                      | Antibiotic            |        |            | Cell wall synthesis                                |                     |                    | Kuzin, Ap.P., et al., Biochemistry. 1995 Jul 25;34(29):9532-40                                                                                                                                                                                  |

| Rack No. | Rack Position | CATNUM | CAS number  | Mol. Weight Structure | Name                                                             | Secondary Name                                                                                              | Class              | Enzyme | Action       | Selectivity              | Solubility in Water | Solubility in DMSO | Reference                                                                                                                                                                                                                         |
|----------|---------------|--------|-------------|-----------------------|------------------------------------------------------------------|-------------------------------------------------------------------------------------------------------------|--------------------|--------|--------------|--------------------------|---------------------|--------------------|-----------------------------------------------------------------------------------------------------------------------------------------------------------------------------------------------------------------------------------|
| 04       | E05           | C 5040 | 1163-36-6   | 362.31                | Clemizole hydrochloride                                          | 1-p-Chlorobenzyl-2-(1-pyrrolidinyl)methylbenzimidazole hydrochloride                                        | Histamine          |        | Antagonist   | H1                       |                     |                    | Oishi, et al., Comparison of the effects of eleven histamine H1-receptor antagonists on monoamine turnover in the mouse brain. Naunyn-Schmiedeberg's Arch. Pharmacol. 349, 140 (1994)                                             |
| 04       | E06           | C 5923 | 486-56-6    | 176.22                | (-)-Cotinine                                                     | S(-)-1-Methyl-5-(3-pyridyl)-2-pyrrolidone                                                                   | Cholinergic        |        | Metabolite   | Nicotinic                |                     |                    | Green, et al., An oral formulation of nicotine for release and absorption in the colon: its development and pharmacokinetics. Br. J. Clin. Pharmacol. 48, 485-493 (1999)                                                          |
| 04       | E07           | C 6506 | 7424-00-2   | 199.64                | (±)-p-Chlorophenylalanine                                        | p-CPA                                                                                                       | Neurotransmission  | Enzyme | Inhibitor    | Tryptophan hydroxylase   |                     |                    | Ricaurte, G.A., Eur J Pharmacol. 2004 Apr 5;489(1-2):1                                                                                                                                                                            |
| 04       | E08           | C 7230 |             | 373.89                | N-(2-[4-(4-Chlorophenyl)piperazin-1-yl]ethyl)-3-methoxybenzamide |                                                                                                             | Dopamine           |        | Agonist      | D4                       | Insoluble           |                    | Perrone, R. et al., A structure-affinity relationship study on derivatives of N-[2-[4-(4-chlorophenyl) piperazin-1-yl]ethyl]-3-methoxybenzamide, a high-affinity and selective D(4) receptor ligand. J. Med. Chem. 43, 270 (2000) |
| 04       | E09           | C 7971 | 68550-75-4  | 342.44                | Cilostamide                                                      | OPC 3689                                                                                                    | Cyclic Nucleotides | Enzyme | Inhibitor    | PDE III                  |                     |                    | Tang, K.M., et al., Eur. J. Pharmacol. 268, 105 (1994)                                                                                                                                                                            |
| 04       | E10           | C 8395 | 38821-53-3  | 349.41                | Cephadrine                                                       | Cefradin; SQ-11436                                                                                          | Antibiotic         |        |              | Cell wall synthesis      |                     |                    | Yuasa, H., J Pharmacol exp Ther. 1994 Jun;269(3):1107-11                                                                                                                                                                          |
| 04       | E11           | C 9511 | 26049-94-5  | 331.80                | Z-L-Phe chloromethyl ketone                                      | N-Carbobenzoyloxy-L-phenylalanyl chloromethyl ketone; ZPCK                                                  | Biochemistry       | Enzyme | Inhibitor    | Chymotrypsin A-gamma     |                     |                    | Segal, D.M., et al., Biochemistry 10, 3728 (1971)                                                                                                                                                                                 |
| 04       | F02           | C 3353 |             | 422.36                | CGP-74514A hydrochloride                                         | N2-(cis-2-Aminocyclohexyl)-N6-(3-chlorophenyl)-9-ethyl-9H-purine-2,6-diamine hydrochloride; Compound 13     | Phosphorylation    | Enzyme | Inhibitor    | Cdk1                     | Yes                 | 11 mg/ml           | Imbach, P., et al., 2,6,9-trisubstituted purines: optimization towards highly potent and selective CDK1 inhibitors. Bioorg. Med. Chem. Lett. 9, 91 (1999)                                                                         |
| 04       | F03           | C 4024 | 298-46-4    | 236.28                | Carbamazepine                                                    | 5H-Dibenz[b,f]azepine-5-carboxamide                                                                         | Anticonvulsant     |        |              |                          | Insoluble           |                    | Afanas'ev, I., Lamotrigine and carbamazepine affect differently the release of D-3-Haspartate from mouse cerebral cortex slices: involvement of NO. Neurochem. Res. 24, 1153 (1999)                                               |
| 04       | F04           | C 4522 | 51481-61-9  | 252.34                | Cimetidine                                                       | SKF-92334; Tagamet                                                                                          | Histamine          |        | Antagonist   | H2                       |                     |                    | Balint, G.A., A possible molecular basis for the effect of gastric anti-ulcerogenic drugs Trends Pharmacol. Sci. 19, 401-403 (1998)                                                                                               |
| 04       | F05           | C 5134 | 146-77-0    | 301.69                | 2-Chloroadenosine                                                | 2-CADO                                                                                                      | Adenosine          |        | Agonist      | A1 > A2                  |                     |                    | Abdul-Ghani, A.S., et al., Eur. J. Pharmacol. 326, 7 (1997)                                                                                                                                                                       |
| 04       | F06           | C 5976 | 138908-40-4 | 465.80                | CL 316,243                                                       | Disodium 5-[(2R)-2-[(2R)-2-(3-Chlorophenyl)-2-hydroxyethyl]amino]propyl]-1,3-benzodioxole-2,2-dicarboxylate | Adrenoceptor       |        | Agonist      | beta3                    | Yes                 | >0.5 mg/ml         | Umekawa, T., et al., Effect of CL 316,243, a highly specific beta3-adrenoceptor agonist, on lipolysis of human and rat adipocytes Horm. Metab. Res. 28, 394 (1996)                                                                |
| 04       | F07           | C 6628 | 50-63-5     | 515.87                | Chloroquine diphosphate                                          |                                                                                                             | DNA                |        | Intercalator | DNA                      |                     |                    | Luthman, H., and Magnusson, G., High efficiency polyoma DNA transfection of chloroquine treated cells Nucl. Acids Res. 11, 1295-1308 (1983)                                                                                       |
| 04       | F08           | C 7255 | 56-17-7     | 225.20                | Cystamine dihydrochloride                                        | Decarboxycystine dihydrochloride                                                                            | Glutamate          | Enzyme | Inhibitor    | Transglutaminase         |                     |                    | Jentile, R., et al., J Neurosci Res. 2003 Oct 1;74(1):52-9                                                                                                                                                                        |
| 04       | F09           | C 8011 | 138-60-3    | 183.12                | Chelidamic acid                                                  | 4-Hydroxypyridine-2,6-dicarboxylic acid                                                                     | Glutamate          | Enzyme | Inhibitor    | L-glutamic decarboxylase |                     |                    | Porter, T.G., et al., Biochem Pharmacol. 1985 Dec 1;34(23):4145-50                                                                                                                                                                |
| 04       | F10           | C 8417 | 40616-75-9  | 313.07                | DSP-4 hydrochloride                                              | N-(2-Chloroethyl)-N-ethyl-2-bromobenzylamine hydrochloride                                                  | Adrenoceptor       |        | Neurotoxin   |                          | Yes                 | 48 mg/ml           | Liang, K.C., Pretraining infusion of DSP-4 into the amygdala impaired retention in the inhibitory avoidance task: involvement of norepinephrine but not serotonin in memory facilitation Chin. J. Physiol. 41, 223-233 (1998)     |
| 04       | F11           | C 9611 | 179067-99-3 | 247.25                | CPCCOEt                                                          | 7-(Hydroxyimino)cyclopropa[b]chromen-1a-carboxylate ethyl ester                                             | Glutamate          |        | Antagonist   | mGluR1                   |                     |                    | Litschig, S. et al., Mol. Pharmacol. 55, 453-461 (1999)                                                                                                                                                                           |
| 04       | G02           | C 3412 | 427-51-0    | 416.95                | Cyproterone acetate                                              | 6-Chloro-1beta,2beta-dihydro-17-hydroxy-3H-cyclopropa(1,2)-pregna-1,4,6-triene-3,20-dione acetate           | Hormone            |        | Antagonist   | Androgen                 |                     |                    | Mondal, S., and Rai, U., Gen. Comp. Endocrinol. 116, 291 (1999)                                                                                                                                                                   |
| 04       | G03           | C 4042 | 62571-86-2  | 217.29                | Captopril                                                        | (S)-1-(3-Mercapto-2-methyl-1-oxo-propyl)-L-proline                                                          | Neurotransmission  | Enzyme | Inhibitor    | ACE                      |                     |                    | Gavras, H., and Brunner, H.R., Role of angiotensin and its inhibition in hypertension, ischemic heart disease, and heart failure. Curr. Hypertens. Rep. 37, 342-345 (2001)                                                        |

| Rack No. | Rack Position | CATNUM | CAS number | Mol. Weight Structure | Name                                                | Secondary Name                                                                                             | Class                 | Enzyme | Action     | Selectivity               | Solubility in Water | Solubility in DMSO | Reference                                                                                                                                                                                                                                                |
|----------|---------------|--------|------------|-----------------------|-----------------------------------------------------|------------------------------------------------------------------------------------------------------------|-----------------------|--------|------------|---------------------------|---------------------|--------------------|----------------------------------------------------------------------------------------------------------------------------------------------------------------------------------------------------------------------------------------------------------|
| 04       | G04           | C 4542 | 6202-23-9  | 311.86                | Cyclobenzaprine hydrochloride                       | 5-(3-Dimethylaminopropylidene)diбензо[а,е]сycloheptatriene hydrochloride                                   | Serotonin             |        | Antagonist | 5-HT2                     |                     |                    | Kobayashi, H., Cyclobenzaprine a centrally acting muscle relaxant acts on descending serotonergic systems. Eur. J. Pharmacol. 311, 29 (1996)                                                                                                             |
| 04       | G05           | C 5259 | 590-63-6   | 196.68                | Bethanechol chloride                                | Carbamyl-beta-methylcholine chloride                                                                       | Cholinergic           |        | Agonist    | Muscarinic                | Yes                 | 1.7 mg/ml          | Koga, Y., et al., Role of acetylcholinesterase in airway epithelium-mediated inhibition of acetylcholine-induced contraction of guinea-pig isolated trachea. Eur. J. Pharmacol. 220, 146 (1992)                                                          |
| 04       | G06           | C 5982 |            | 256.69                | 7-Chloro-4-hydroxy-2-phenyl-1,8-naphthyridine       |                                                                                                            | Adenosine             |        | Antagonist | A1                        | Insoluble           |                    | Ferrarini, P.L., J. Med. Chem. 43, 2814 (2000)                                                                                                                                                                                                           |
| 04       | G07           | C 6643 | 637-07-0   | 242.70                | Clofibrate                                          |                                                                                                            | Lipid                 | Enzyme | Modulator  | Lipoprotein lipase        |                     |                    | Buchmann, A., et al., Inhibition of transforming growth factor beta1-induced hepatoma cell apoptosis by liver tumor promoters: characterization of primary signaling events and effects on CPP32-like caspase activity. Cell Death Differ. 6, 190 (1999) |
| 04       | G08           | C 7291 | 13721-77-6 | 351.32                | Clomipramine hydrochloride                          | Anafranil hydrochloride; Chloripramine                                                                     | Serotonin             |        | Inhibitor  | Reuptake                  | Yes                 | 25 mg/ml           | Ortiz, J., and Artigas, F., Effects of monoamine uptake inhibitors on extracellular and platelet 5-hydroxytryptamine in rat blood: different effects of clomipramine and fluoxetine Br. J. Pharmacol. 105, 941-946 (1992)                                |
| 04       | G09           | C 8031 | 41552-82-3 | 335.37                | N6-Cyclopentyladenosine                             | CPA                                                                                                        | Adenosine             |        | Agonist    | A1                        | Yes                 | 1.7 mg/ml          | Lohse, et al., 2-Chloro-N6-cyclopentyladenosine: A highly selective agonist at A1adenosine receptors., Naunyn-Schmiedeberg's Arch. Pharmacol. 337, 687-689 (1988)                                                                                        |
| 04       | G10           | C 8645 | 28657-80-9 | 262.22                | Cinoxacin                                           | 1-Ethyl-1,4-dihydro-4-oxo[1,3]dioxolo[4,5-g]cinnoline-3-carboxylic acid                                    | Antibiotic            | Enzyme | Inhibitor  |                           |                     |                    | Goldstein, E.J., et al., Am J Med. 1987 Apr 27;82(4A):284-7                                                                                                                                                                                              |
| 04       | G11           | C 9754 | 64-86-8    | 399.45                | Colchicine                                          |                                                                                                            | Cytoskeleton and ECM  |        | Inhibitor  | Tubulin                   | Yes                 | 10 mg/ml           | Luduena, R.F., et al., Tubulin structure and biochemistry Curr. Opin. Cell Biol. 4, 53-57 (1992)                                                                                                                                                         |
| 04       | H02           | C 3635 | 14173-40-1 | 250.13                | DL-p-Chlorophenylalanine methyl ester hydrochloride |                                                                                                            | Neurotransmission     | Enzyme | Inhibitor  | Tryptophan hydroxylase    |                     |                    | Farabolini, F., et al., Pharmacol Biochem Behav. 1981 Jun;14(6):911-4                                                                                                                                                                                    |
| 04       | H03           | C 4238 |            | 339.87                | CNS-1102                                            | N-(3-Ethylphenyl)-N-methyl-N'-1-naphthalenylguanidine monohydrochloride; Cerestat; Aptiganel hydrochloride | Glutamate             |        | Antagonist | NMDA                      | Yes                 | 17 mg/ml           | Schabitz, W.R. et al., Stroke 31, 1709-1714 (2000)                                                                                                                                                                                                       |
| 04       | H04           | C 4662 | 23142-01-1 | 525.60                | Carbetapentane citrate                              | 1-Phenyl-cyclopentanecarboxylic acid 2-[2-(Diethylamino)ethoxy]ethyl ester citrate                         | Opioid                |        | Ligand     | sigma1                    | Yes                 |                    | Annels, S.J., et al., Non-opioid antitussives inhibit endogenous glutamate release from rabbit hippocampal slices Brain Res. 564, 341 (1991)                                                                                                             |
| 04       | H05           | C 5270 | 298-57-7   | 368.53                | Cinnarizine                                         | 1-trans-Cinnamyl-4-diphenylmethylpiperazine                                                                | Ca2+ Channel          |        | Blocker    |                           |                     |                    | Daniel and Mauro, Extrapyramidal symptoms associated with calcium-channel blockers. Pharmacotherapy 29, 73 (1995)                                                                                                                                        |
| 04       | H06           | C 6019 | 23593-75-1 | 344.85                | Clotrimazole                                        | 1-(o-Chlorotrityl)imidazole                                                                                | K+ Channel            |        | Inhibitor  | Ca2+-activated K+ channel |                     |                    | Snajdrova, L., et al., J. Biol. Chem. 273, 28032 (1998)                                                                                                                                                                                                  |
| 04       | H07           | C 6645 | 69-74-9    | 279.68                | Cytosine-1-beta-D-arabinofuranoside hydrochloride   | Arabinocytidine hydrochloride; Arabinosylcytosine hydrochloride; Ara-C hydrochloride                       | DNA Metabolism        |        | Inhibitor  |                           |                     |                    | de Vroom, E., et al., Nucleic Acids Res. 1988;16:2987-3003.                                                                                                                                                                                              |
| 04       | H08           | C 7522 | 52665-69-7 | 523.63                | Calcimycin                                          | A23187; Calcium ionophore A23187                                                                           | Intracellular Calcium |        |            | Ca2+                      |                     |                    | Pressman, B.C., et al., Biological applications of ionophores Ann. Rev. Biochem. 45, 50-530 (1976)                                                                                                                                                       |
| 04       | H09           | C 8088 |            | 214.22                | Cantharidic Acid                                    |                                                                                                            | Phosphorylation       | Enzyme | Inhibitor  | PP1 / PP2A                |                     |                    | Li, Y.M. and Casida, J.E., Proc. Natl. Acad. Sci. USA 89, 11867 (1992)                                                                                                                                                                                   |
| 04       | H10           | C 8759 | 78-44-4    | 260.34                | Carisoprodol                                        |                                                                                                            | Neurotransmission     |        |            | Skeletal muscle           |                     |                    | Barnett, A., Goldstein, J., Etonitazine-induced rigidity and its antagonism by centrally acting muscle relaxants. Eur. J. Pharmacol. 30, 23 (1975)                                                                                                       |
| 04       | H11           | C 9758 | 2219-31-0  | 274.25                | L-Canavanine sulfate                                | L-alpha-Amino-gamma-(guanidinoxy)butyric acid sulfate                                                      | Nitric Oxide          | Enzyme | Inhibitor  | iNOS                      | Yes                 | 100 mg/ml          | Knowles, R.G., and Moncada, S., Nitric oxide synthases in mammals Biochem. J. 298, 249-258 (1994)                                                                                                                                                        |



| Rack No. | Rack Position | CATNUM | CAS number  | Mol. Weight Structure | Name                                      | Secondary Name                                                                                | Class             | Enzyme | Action           | Selectivity           | Solubility in Water | Solubility in DMSO | Reference                                                                                                                                                                                                                |
|----------|---------------|--------|-------------|-----------------------|-------------------------------------------|-----------------------------------------------------------------------------------------------|-------------------|--------|------------------|-----------------------|---------------------|--------------------|--------------------------------------------------------------------------------------------------------------------------------------------------------------------------------------------------------------------------|
| 05       | A02           | C 9847 | 2259-96-3   | 389.88                | Cyclothiazide                             | 6-Chloro-3,4-dihydro-3-(2-norbornen-5-yl)-2H-1,2,4-benzothiadiazine-7-sulfonamide 1,1-dioxide | Glutamate         |        | Agonist          | AMPA                  |                     |                    | Schmidhammer, et al., Synthesis and biological evaluation of 14-alkoxymorphinans. 2 (-)-N-(Cyclopropylmethyl)-4,14-dimethoxymorphinan-6-one, a selective opioid receptor antagonist. J. Med. Chem. 32, 418 (1989)        |
| 05       | A03           | C-104  | 100828-16-8 | 252.21                | (±)-CPP                                   | (±)-3-(2-Carboxypiperazin-4-yl)propyl-1-phosphonic acid                                       | Glutamate         |        | Antagonist       | NMDA                  | Yes                 | 99.2 mg/ml         | Murphy, et al., Binding of [3H]-3-(2-carboxypiperazin-4-yl)propyl-1-phosphonic acid to rat brain membranes: a selective high affinity ligand for N-methyl-D-aspartate receptors J. Pharmacol. Exp. Ther. 240, 778 (1987) |
| 05       | A04           | C-141  | 124182-57-6 | 535.99                | CGS-21680 hydrochloride                   | 2-p-(2-Carboxyethyl)phenethylamino-5'-N-ethylcarboxamidoadenosine hydrochloride               | Adenosine         |        | Agonist          | A2a                   | Yes                 | 1.5 mg/ml          | Jarvis, et al., [3H]CGS 21680 a selective A2adenosine receptor agonist directly labels A2receptors in rat brain J. Pharmacol. Exp. Ther. 251, 888 (1989)                                                                 |
| 05       | A05           | C-199  | 104615-18-1 | 285.69                | CGS-15943                                 | 9-Chloro-2-(2-furyl)[1,2,4]triazolo[1,5-c]quinazolin-5-amine                                  | Adenosine         |        | Antagonist       | A1                    | Insoluble           |                    | Williams, M., et al., Biochemical characterization of the triazoloquinazolin CGS 15943 a novel non-xanthine adenosine antagonist. J. Pharmacol. Exp. Ther. 241, 415 (1987)                                               |
| 05       | A06           | C-277  | 163042-96-4 | 544.74                | Chloro-IB-MECA                            | 2-Chloro-N6-(3-iodobenzyl)-adenosine-5'-N-methyluronamide                                     | Adenosine         |        | Agonist          | A3                    | Insoluble           |                    | Dunwiddie, T.V., et al., Activation of hippocampal adenosine A3receptors produces a desensitization of A1receptor-mediated responses in rat hippocampus. J. Neurosci. 17, 607-614 (1997)                                 |
| 05       | A07           | D 1306 | 581-88-4    | 448.55                | Debrisoquin sulfate                       | 3,4-Dihydro-2(1H)-isoquinolinecarboximidamide sulfate; Ro 5-33071                             | Neurotransmission |        | Antihypertensive |                       |                     |                    | Scarr, E., et al., Prog. Neuropsychopharmacol. Biol. Psychiatry 15, 297 (1991)                                                                                                                                           |
| 05       | A08           | D 2521 | 33286-22-5  | 450.99                | Diltiazem hydrochloride                   |                                                                                               | Ca2+ Channel      |        | Antagonist       | L-type                |                     |                    | Smirnov, S.V., Aaronson, P.I., Eur. J. Pharmacol. 360, 81 (1998)                                                                                                                                                         |
| 05       | A09           | D 3689 | 162870-29-3 | 183.17                | (S)-3,5-Dihydroxyphenylglycine            | S-DHPG                                                                                        | Glutamate         |        | Agonist          | mGluR1                |                     |                    | Zalewska-Winska, A., Wisniewski, K., Pharmacol. Res. 42, 239 (2000)                                                                                                                                                      |
| 05       | A10           | D 4505 | 630-93-3    | 274.26                | Phenytoin sodium                          | 5,5-Diphenylhydantoin sodium                                                                  | Anticonvulsant    |        |                  |                       |                     |                    | Morimoto, K., et al., BW1003C87, phenytoin and carbamazepine elevate seizure threshold in the rat amygdala-kindling model of epilepsy. Eur. J. Pharmacol. 339, 11-15 (1997)                                              |
| 05       | A11           | D 5564 |             | 178.15                | Daphnetin                                 | 7,8-Dihydroxycoumarin                                                                         | Phosphorylation   | Enzyme | Inhibitor        | PK                    |                     |                    | Yang, Y.Z., et al., Daphnetin: a novel antimalarial agent with in vitro and in vivo activity. Am. J. Trop. Med. Hyg. 46, 15 (1992)                                                                                       |
| 05       | B02           | C 9901 | 36396-99-3  | 349.39                | N6-Cyclohexyladenosine                    | CHA                                                                                           | Adenosine         |        | Agonist          | A1                    |                     |                    | Daisley, J.N. and Rose, S.P., Brain Res. 847, 149 (1999)                                                                                                                                                                 |
| 05       | B03           | C-106  | 109028-10-6 | 450.42                | CGS-12066A maleate                        | 7-Trifluoromethyl-4(4-methyl-1-piperazinyl)-pyrrolo[1,2-a]quinoxaline maleate                 | Serotonin         |        | Agonist          | 5-HT1B                | Yes                 | 1.4 mg/ml          | Neale, et al., Biochemical and pharmacological characterization of CGS 120668a selective serotonin-1B agonist. Eur. J. Pharmacol. 136, 1 (1987)                                                                          |
| 05       | B04           | Y 0503 | 146986-50-7 | 320.26                | Y-27632 dihydrochloride                   | (R)-(+)-trans-4-(1-Aminoethyl)-N-(4-Pyridyl)cyclohexanecarboxamide dihydrochloride            | Phosphorylation   | Enzyme | Inhibitor        | ROCK                  | Yes                 | 14 mg/ml           | Maekawa, M., et al., Signaling from Rho to the actin cytoskeleton through protein kinases ROCK and LIM-kinase Science 389, 895-898 (1999)                                                                                |
| 05       | B05           | C-203  | 14685-79-1  | 198.60                | 2-Chloro-2-deoxy-D-glucose                | 2-Chloro-DG                                                                                   | Biochemistry      |        | Analog           | Glucose               |                     |                    | Alexoff et al. "Ion Chromatographic analysis of high specific activityFDG preparations and detection of the chemical impurity 2-Deoxy-2-chloro-D-glucose." Appl. Radiat. Isot. 43, 1313 (1992)                           |
| 05       | B06           | D 0411 | 2170-58-3   | 381.86                | WB-4101 hydrochloride                     | 2-(2,6-Dimethoxyphenoxyethyl)aminomethyl-1,4-benzodioxane hydrochloride                       | Adrenoceptor      |        | Antagonist       | alpha1A               | Yes                 |                    | Bolognesi, M.L., et al., WB 4101-related compounds. 2. Role of the ethylene chain separating amine and phenoxy units on the affinity for 1-adrenoreceptor subtypes and 5-HT1A receptors. J. Med. Chem. 42, 4214 (1999)   |
| 05       | B07           | D 1413 | 3056-17-5   | 224.22                | 2',3'-didehydro-3'-deoxythymidine         | 2',3'-Anhydrothymidine; d4T                                                                   | Immune System     | Enzyme | Inhibitor        | Reverse Transcriptase |                     |                    | Baba, M., et al., Biochem. Biophys. Res. Comm. 142, 128 (1987)                                                                                                                                                           |
| 05       | B08           | D 2531 | 6700-34-1   | 352.32                | Dextromethorphan hydrobromide monohydrate | d-3-Methoxy-N-methylmorphinan hydrobromide                                                    | Glutamate         |        | Antagonist       | NMDA                  |                     |                    | Klein, et al., The effect of prototypic sigma ligands on the binding of [3H]dextromethorphan to guinea pig brain. Neurosci. Lett. 91, 175 (1989)                                                                         |
| 05       | B09           | D 3768 | 522-51-0    | 527.59                | Dequalinium dichloride                    | 1,1'-Decamethylenebis(4-aminoquinaldinium) dichloride                                         | K+ Channel        |        | Blocker          |                       |                     |                    | Rotenberg, S.A. and Sun, X.G., J. Biol. Chem. 273, 2390 (1998)                                                                                                                                                           |

| Rack No. | Rack Position | CATNUM | CAS number  | Mol. Weight Structure | Name                                                          | Secondary Name                                                                     | Class             | Enzyme | Action     | Selectivity           | Solubility in Water | Solubility in DMSO | Reference                                                                                                                                                                                                                                                    |
|----------|---------------|--------|-------------|-----------------------|---------------------------------------------------------------|------------------------------------------------------------------------------------|-------------------|--------|------------|-----------------------|---------------------|--------------------|--------------------------------------------------------------------------------------------------------------------------------------------------------------------------------------------------------------------------------------------------------------|
| 05       | B10           | D 4526 | 1229-2-4    | 315.85                | Doxepin hydrochloride                                         |                                                                                    | Adrenoceptor      |        | Inhibitor  | Uptake                | Yes                 |                    | Richelson, E., and Nelson, A., Antagonism by antidepressants of neurotransmitter receptors of normal human brain in vitro J. Pharmacol. Exp. Ther. 230, 94-102 (1984)                                                                                        |
| 05       | B11           | D 5689 |             | 246.31                | DM 235                                                        |                                                                                    | Nootropic         |        |            |                       | Yes                 | 24 mg/ml           | Manetti, D. et al, J. Med. Chem. 43, 4499 (2000)                                                                                                                                                                                                             |
| 05       | C02           | C 9911 | 7689-03-4   | 348.36                | (S)-(+)-Camptothecin                                          |                                                                                    | Apoptosis         | Enzyme | Inhibitor  | Topol                 |                     |                    | Beidler, D.R., and Cheng, Y.C., Camptothecin induction of a time- and concentration-dependent decrease of topoisomerase I and its implication in camptothecin activity Mol. Pharmacol. 47, 907-914 (1994)                                                    |
| 05       | C03           | C-108  | 57-559-31-6 | 207.75                | 2-Cyclooctyl-2-hydroxyethylamine hydrochloride                | CONH hydrochloride                                                                 | Neurotransmission | Enzyme | Inhibitor  | PNMT                  | yes                 |                    | Vincek, et al., J Med Chem. 1981;24:7                                                                                                                                                                                                                        |
| 05       | C04           | C-144  | #####       | 248.12                | 1-(m-Chlorophenyl)-biguanide hydrochloride                    | m-CPBG hydrochloride                                                               | Serotonin         |        | Agonist    | 5-HT3                 | Yes                 |                    | Kilpatrick, et al., Eur J Pharmacol. 1990;182:193.                                                                                                                                                                                                           |
| 05       | C05           | C-207  | 14008-79-8  | 378.35                | 4-Chloro-3-alpha-(diphenylmethoxy)tropane hydrochloride       |                                                                                    | Dopamine          |        | Blocker    | Reuptake              | Yes                 | 6.3 mg/ml          | Newman, A.H., et al., Novel 3a-(diphenylmethoxy)tropane analogs J. Med. Chem. 37, 2258-2261 (1994)                                                                                                                                                           |
| 05       | C06           | D 0540 | 2379-57-9   | 252.14                | DNQX                                                          | 6,7-Dinitroquinoxaline-2,3-dione                                                   | Glutamate         |        | Antagonist | Kainate/quisqualate   |                     |                    | Muller, et al., Contributions of quisqualate and NMDA receptors to the induction and expression of LTP. Science 242, 1694 (1988)                                                                                                                             |
| 05       | C07           | D 1414 | 548-73-2    | 379.44                | Droperidol                                                    | 1-[1-[3-(p-Fluorobenzoyl)propyl]-1,2,3,6-tetrahydro-4-pyridyl]-2-benzimidazolinone | Dopamine          |        | Antagonist | D1/D2                 |                     |                    | Hamik, A., and Peroutka, S.J., Differential interactions of traditional and novel antiemetics with dopamine D2 and 5-HT-3 receptors Cancer Chemother. Pharmacol. 24, 307-310 (1989)                                                                          |
| 05       | C08           | S 0443 | 135938-17-9 | 308.81                | SB 203186                                                     | 1-Piperidinylethyl-1H-indole-3-carboxylate hydrochloride                           | Serotonin         |        | Antagonist | 5-HT4                 | Yes                 | 10 mg/ml           | Parker SG, et al. Naunyn Schmiedebergs Arch Pharmacol. 1995 Dec;353(1):28-35                                                                                                                                                                                 |
| 05       | C09           | D 3775 | 562-10-7    | 388.47                | Doxylamine succinate                                          |                                                                                    | Histamine         |        | Antagonist | H1                    |                     |                    | Brandes, L.J., et al., Enhanced cancer growth in mice administered daily human-equivalent doses of some H1-antihistamines: predictive in vitro correlates. J. Natl. Cancer Inst. 86, 770-775 (1994)                                                          |
| 05       | C10           | P-152  | 26328-11-0  | 248.33                | S(-)-Pindolol                                                 |                                                                                    | Adrenoceptor      |        | Antagonist | beta                  | Insoluble           |                    | Watkins, D.J., et al., Loss of [125I]-pindolol binding to beta-adrenoceptors on rat nodose ganglion after chronic isoprenaline treatment. J. Auton. Nerv. Syst. 60, 12-16 (1996)                                                                             |
| 05       | C11           | D 5766 | 3317-61-1   | 113.16                | 5,5-Dimethyl-1-pyrroline-N-oxide                              | DMPO                                                                               | Cell Stress       | Enzyme | Inhibitor  | Antioxidant           |                     |                    | Lafon-Cazal, M., NMDA-dependent superoxide production and neurotoxicity. Nature 364, 535 (1993)                                                                                                                                                              |
| 05       | D02           | C-007  | 13012-66-3  | 362.92                | 10-(alpha-Diethylamino-propionyl)-phenothiazine hydrochloride | As-1397                                                                            | Biochemistry      | Enzyme | Inhibitor  | Butyrylcholinesterase | Yes                 |                    | Koelle, et al., J Neurochem. 1977;28:307.                                                                                                                                                                                                                    |
| 05       | D03           | C-117  | 118202-69-0 | 319.32                | 5-Carboxamidotryptamine maleate                               | 5-CT; AH-21467                                                                     | Serotonin         |        | Agonist    | 5-HT7                 | Yes                 | 10 mg/ml           | Borton, M., et al., Contractions to 5-hydroxytryptamine (5-HT) receptor agonists in the human saphenous vein. Br. J. Clin. Pharmacol. 30, 107 (1990)                                                                                                         |
| 05       | D04           | C-145  | 49564-60-5  | 629.56                | 2-Chloroadenosine triphosphate tetrasodium                    | 2-Chloro-ATP tetrasodium                                                           | P2 Receptor       |        | Agonist    | P2Y                   | Yes                 |                    | Gough, et al., Three new adenosine triphosphate analogs. Synthesis and effects on isolated gut J. Med. Chem. 16, 1188 (1973)                                                                                                                                 |
| 05       | D05           | C-223  | 40600-13-3  | 252.75                | Cirazoline hydrochloride                                      | 2-[(2-Cyclopropylphenoxy)methyl]-4,5-dihydro-1H-imidazole hydrochloride            | Adrenoceptor      |        | Agonist    | alpha1A               | Yes                 | >35 mg/ml          | Wikberg, et al., Further characterization of the guinea pig cerebral cortex idazoxan receptor: Solubilization, distinction from the imidazole site, and demonstration of cirazoline as an idazoxan receptor-selective drug. J. Neurochem. 55, 192-203 (1990) |
| 05       | D06           | D 0670 | 1183-35-3   | 586.68                | Dihydroouabain                                                |                                                                                    | Ion Pump          |        | Inhibitor  | Na+K+ Pump            |                     |                    | Mogul, D.J., et al., Circ. Res. 64, 1063 (1989)                                                                                                                                                                                                              |
| 05       | D07           | D 1507 | 1421-65-4   | 247.68                | L-3,4-Dihydroxyphenylalanine methyl ester hydrochloride       | Methyl L-DOPA hydrochloride                                                        | Dopamine          |        | Precursor  |                       |                     |                    | Tabar, et al., The effects on central dopamine function of chronic L-DOPA (methyl ester hydrochloride) treatment of mice. Pharmacol. Biochem. Behav. 33, 139-146 (1989)                                                                                      |

| Rack No. | Rack Position | CATNUM | CAS number  | Mol. Weight Structure | Name                               | Secondary Name                                                                                                                               | Class           | Enzyme | Action     | Selectivity            | Solubility in Water | Solubility in DMSO | Reference                                                                                                                                                                                                                                                         |
|----------|---------------|--------|-------------|-----------------------|------------------------------------|----------------------------------------------------------------------------------------------------------------------------------------------|-----------------|--------|------------|------------------------|---------------------|--------------------|-------------------------------------------------------------------------------------------------------------------------------------------------------------------------------------------------------------------------------------------------------------------|
| 05       | D08           | D 2763 | 6190-39-2   | 679.80                | Dihydroergotamine methanesulfonate |                                                                                                                                              | Serotonin       |        | Antagonist |                        | Insoluble           |                    | Glusa, E., and Roos, A., Endothelial 5-HT receptors mediate relaxation of porcine pulmonary arteries in response to ergotamine and dihydroergotamine. Br. J. Pharmacol. 119, 330-334 (1996)                                                                       |
| 05       | D09           | D 3900 | 58-28-6     | 302.85                | Desipramine hydrochloride          |                                                                                                                                              | Adrenoceptor    |        | Inhibitor  | Uptake                 | Yes                 | 50 mg/ml           | Zhu, M.Y., et al., Down-regulation of the human norepinephrine transporter in intact 293-hNET cells exposed to desipramine. J. Neurochem. 70, 1547-1555 (1999)                                                                                                    |
| 05       | D10           | D 5290 | 829-74-3    | 183.21                | (-)-alpha-Methylnorepinephrine     | Levonordefrin; (-)-3,4-Dihydroxynorephedrine                                                                                                 | Adrenoceptor    |        | Agonist    |                        |                     |                    | Anderson, G.F., et al., Neurosci Lett. 1995 Jan 16;184(1):59-62                                                                                                                                                                                                   |
| 05       | D11           | D 5782 | 7481-89-2   | 211.22                | 2',3'-dideoxycytidine              | ddC                                                                                                                                          | Immune System   | Enzyme | Inhibitor  | Reverse Transcriptase  |                     |                    | Borg, N., et al., Pharmacokinetics and distribution over the blood-brain barrier of zalcitabine (2',3'-dideoxycytidine) and BEA005 (2',3'-dideoxy-3'-hydroxymethylcytidine) in rats, studied by microdialysis. Antimicrob. Agents Chemother. 42, 2174-2177 (1998) |
| 05       | E02           | C-008  | 16709-43-6  | 287.14                | (+)-cis-Dioxolane iodide           | L(+)-cis-2-Methyl-4-trimethylammoniummethyl-1,3-dioxolane iodide                                                                             | Cholinergic     |        | Agonist    | Muscarinic             | Yes                 | 10 mg/ml           | Potter, L.T., and Ferrendelli, C.A., Affinities of different cholinergic agonists for the high and low affinity states of hippocampal M1 muscarine receptors J. Pharmacol. Exp. Ther. 248, 974-978 (1989)                                                         |
| 05       | E03           | C-121  | 18000-24-3  | 223.62                | 7-Chlorokynurenic acid             | 7-Cl-KYNA                                                                                                                                    | Glutamate       |        | Antagonist | NMDA                   |                     |                    | Kemp, J.A., et al., 7-Chlorokynurenic acid is a selective antagonist at the glycine modulatory site of the N-methyl-D-aspartate receptor complex. Proc. Natl. Acad. Sci. USA 85, 6547 (1988)                                                                      |
| 05       | E04           | C-147  | 3572-80-3   | 271.41                | (+)-Cyclazocine                    |                                                                                                                                              | Opioid          |        | Antagonist |                        | Insoluble           |                    | Church, J.L., and Lodge, D., Cyclazocine and pentazocine as N-methylaspartate antagonists on cat and rat spinal neurons in vivo. J. Pharmacol. Exp. Ther. 253, 636-645 (1990)                                                                                     |
| 05       | E05           | C-231  | 105737-62-0 | 590.58                | CGP 20712A methanesulfonate        | (+/-)-2-Hydroxy-5-[2-[[2-hydroxy-3-[4-[1-methyl-4-(trifluoromethyl)-1H-imidazol-2-yl]phenoxy]propyl]amino]ethoxy]-benzamide methanesulfonate | Adrenoceptor    |        | Antagonist | beta1                  | Yes                 | 100 mg/ml          | Dooley, D.J., et al., CGP 20712 A: A useful tool for quantifying beta1- and beta2-adrenoceptors Eur. J. Pharmacol. 130, 137-139 (1986)                                                                                                                            |
| 05       | E06           | D 0676 | 49745-95-1  | 337.85                | Dobutamine hydrochloride           | (±)-4-[2-[[3-(4-Hydroxyphenyl)-1-methylpropyl]amino]ethyl]-1,2-benzenediol hydrochloride                                                     | Adrenoceptor    |        | Agonist    | beta1                  |                     |                    | Aikawa, J., et al., Vascular smooth muscle relaxation by alpha-adrenoceptor blocking action of dobutamine in isolated rabbit aorta. J. Cardiovasc. Pharmacol. 27, 33-36 (1996)                                                                                    |
| 05       | E07           | D 1542 | 100937-52-8 | 169.61                | 1,4-Dideoxy-1,4-imino-D-arabinitol | DAB; 2-Hydroxymethyl-3,4-pyrrolidinediol                                                                                                     | Phosphorylation | Enzyme | Inhibitor  | Glycogen phosphorylase |                     |                    | Winchester, B. et al., Biochem J. 1993;290:743-749.                                                                                                                                                                                                               |
| 05       | E08           | D 2926 | 4673-26-1   | 314.55                | Diphenyleiiodonium chloride        | [1,1'-Biphenyl]-2,2'-diiodonium chloride                                                                                                     | Nitric Oxide    | Enzyme | Inhibitor  | eNOS                   |                     |                    | Stuehr, D.J., et al., Inhibition of macrophage and endothelial cell nitric oxide synthase by diphenyleiiodonium and its analogs. FASEB J. 5, 98-103 (1991)                                                                                                        |
| 05       | E09           | D 4000 | 53-43-0     | 288.43                | trans-Dehydroandrosterone          | 5-Androsten-3beta-ol-17-one; DHEA                                                                                                            | Hormone         |        |            | Aldosterone            |                     |                    | Ebeling, P., and Koivisto, V.A., Physiological importance of dehydroepiandrosterone. Lancet 343, 1479-1481 (1994)                                                                                                                                                 |
| 05       | E10           | D 5294 | 20153-98-4  | 677.63                | Dilazep hydrochloride              | Cormelian                                                                                                                                    | Adenosine       |        | Inhibitor  | Uptake                 | Yes                 | 10 mg/ml           | Deguchi, H. et al., Blood 90, 2345-2356 (1997)                                                                                                                                                                                                                    |
| 05       | E11           | D 5794 | 120166-69-0 | 489.59                | Diacylglycerol Kinase Inhibitor II | R59949                                                                                                                                       | Phosphorylation | Enzyme | Inhibitor  | Diacylglycerol kinase  | Insoluble           |                    | de Chaffoy de Courcelles, D., et al, R59022, a diacylglycerol kinase inhibitor. Its effect on diacylglycerol and thrombin-induced C kinase activation in the intact platelet J. Biol. Chem. 260, 15762 (1985)                                                     |
| 05       | F02           | C-011  | 76541-57-6  | 303.21                | OXA-22 iodide                      | cis-2-Methyl-5-trimethylammoniummethyl-1,3-oxathiolane iodide                                                                                | Cholinergic     |        | Agonist    | Muscarinic             | Yes                 |                    | Angeli, P., et al., Affinity and efficacy correlate with chemical structure more than potency does in a series of pentatomic cyclic muscarinic agonists. Br. J. Pharmacol. 85, 783-786 (1985)                                                                     |

| Rack No. | Rack Position | CATNUM | CAS number  | Mol. Weight Structure | Name                                                      | Secondary Name                                                                                    | Class             | Enzyme | Action     | Selectivity                       | Solubility in Water | Solubility in DMSO | Reference                                                                                                                                                                                                                                                           |
|----------|---------------|--------|-------------|-----------------------|-----------------------------------------------------------|---------------------------------------------------------------------------------------------------|-------------------|--------|------------|-----------------------------------|---------------------|--------------------|---------------------------------------------------------------------------------------------------------------------------------------------------------------------------------------------------------------------------------------------------------------------|
| 05       | F03           | C-125  | 81047-99-6  | 315.80                | (±)-CGP-12177A hydrochloride                              | 4-[4-[(1,1-Dimethylethyl)amino]-2-hydroxypropoxy]-1,3-dihydro-2H-benzimidazol-2-one hydrochloride | Adrenoceptor      |        | Agonist    | beta                              | Yes                 |                    | Oostendorp, J., et al., Contribution of $\alpha$ -adrenoceptor subtypes to relaxation of colon and oesophagus and pacemaker activity of ureter in wildtype and $\beta$ 3-adrenoceptor knockout mice Br. J. Pharmacol. 130, 747-758 (2000)                           |
| 05       | F04           | C-191  | 138977-28-3 | 376.91                | Capsazepine                                               | N-[2-(4-Chlorophenyl)ethyl]-1,3,4,5-tetrahydro-7,8-dihydroxy-2H-2-benzazepine-2-carbothioamide    | Vanilloid         |        | Agonist    |                                   |                     |                    | Urban, et al., Capsazepine, a novel capsaicin antagonist, selectively antagonises the effects of capsaicin in the mouse spinal cord in vitro. Neurosci. Lett. 134, 9 (1991)                                                                                         |
| 05       | F05           | C-237  | 117857-93-9 | 159.14                | (2S,1'S,2'S)-2-(carboxycyclopropyl)glycine                | L-CCG-1                                                                                           | Glutamate         |        | Agonist    | mGluR2                            | Yes                 | > 7.0 mg/ml        | Yamashita, H., et al., Inhibition by folded isomers of L-2-(carboxycyclopropyl)glycine of glutamate uptake via the human glutamate transporter hGluT-1. Eur. J. Pharmacol. 289, 387-390 (1995)                                                                      |
| 05       | F06           | D 1064 | 52497-36-6  | 229.28                | Dihydrokainic acid                                        | 2-Carboxy-4-isopropyl-3-pyrrolidineacetic acid                                                    | Glutamate         |        | Blocker    | Kainate                           | Yes                 | > 110mg/ml         | Wang, G.J., et al., Dihydrokainate-sensitive neuronal glutamate transport is required for protection of rat cortical neurons in culture against synaptically released glutamate. Eur. J. Neurosci. 10, 2523-2531 (1998)                                             |
| 05       | F07           | D 1791 | 111495-86-4 | 348.24                | 2,4-Dinitrophenyl 2-fluoro-2-deoxy-beta-D-glucopyranoside |                                                                                                   | Biochemistry      | Enzyme | Inhibitor  | exo-beta-(1,3)-Glucanase          |                     |                    | Withers, S.G., et al., J. Amer. Chem. Soc. 109, 7530 (1987)                                                                                                                                                                                                         |
| 05       | F08           | D 3630 | 147-24-0    | 291.82                | Diphenhydramine hydrochloride                             |                                                                                                   | Histamine         |        | Antagonist | H1                                |                     |                    | Saitou, et al., Slow wave sleep-inducing effects of first generation H1-antagonists. Biol. Pharm. Bull. 22, 1079 (1999)                                                                                                                                             |
| 05       | F09           | D 4007 | 57-41-0     | 252.28                | 5,5-Diphenylhydantoin                                     | Phenytoin                                                                                         | Anticonvulsant    |        |            |                                   |                     |                    | Morimoto, K., et al., BW1003C87, phenytoin and carbamazepine elevate seizure threshold in the rat amygdala-kindling model of epilepsy. Eur. J. Pharmacol. 339, 11-15 (1997)                                                                                         |
| 05       | F10           | D 5297 | 78590-17-7  | 390.48                | Dehydroisoandrosterone 3-sulfate sodium                   | Dehydroepiandrosterone 3-sulfate sodium                                                           | GABA              |        | Modulator  | GABA-A                            |                     |                    | Nilsson, K.R., et al., Neurosteroid analogues. 6. The synthesis and GABA receptor pharmacology of enantiomers of dehydroepiandrosterone sulfatepregnenolone sulfate and (3 $\alpha$ 5 $\beta$ )-3-hydroxypregnan-20-one sulfate. J. Med. Chem. 41, 2604-2613 (1998) |
| 05       | F11           | D 5814 | 123039-93-0 | 303.79                | Dihydroxidine hydrochloride                               | (±)-trans-10,11-Dihydroxy-5,6,6a,7,8,12b-hexahydrobenzo[a]phenanthridine hydrochloride            | Dopamine          |        | Agonist    | D1                                |                     |                    | Brewster, W.K., Trans-10,11-dihydroxy-5,6,6a,7,8,12b-hexahydrobenzo[a]phenanthridine: a highly potent selective dopamine D1 full agonist. J. Med. Chem. 33, 1756 (1990)                                                                                             |
| 05       | G02           | C-101  | 102146-07-6 | 304.40                | 8-Cyclopentyl-1,3-dipropylxanthine                        | DPCPX; PD 116,948                                                                                 | Adenosine         |        | Antagonist | A1                                | Insoluble           |                    | Lee, et al., 1,3-Dipropyl-8-cyclopentylxanthine (DPCPX) inhibition of [ <sup>3</sup> H]-ethylcarboxamidoadenosine (NECA) binding allows the visualization of putative non-A1 adenosine receptors Brain Res. 368, 394-398 (1996)                                     |
| 05       | G03           | C-126  | 28860-95-9  | 226.23                | S-(-)-Carbidopa                                           |                                                                                                   | Biochemistry      | Enzyme | Inhibitor  | Aromatic amino acid decarboxylase |                     |                    | Lotti, V.J., et al., Potentiation and inhibition of some central actions of L(-)-DOPA by decarboxylase inhibitors J. Pharmacol. Exp. Ther. 172, 406-415 (1970)                                                                                                      |
| 05       | G04           | C-192  | 80-77-3     | 273.74                | Chlormezanone                                             | 2-(4-Chlorophenyl)tetrahydro-3-methyl-4H-1,3-thiazin-4-one 1,1-dioxide                            | Neurotransmission |        | Modulator  | Muscle relaxant                   | No                  | Yes                | Adam, K., and Oswald, I. Br J Clin Pharmacol. 1982;14:57-65.                                                                                                                                                                                                        |
| 05       | G05           | C-239  |             | 276.12                | CNQX disodium                                             | 6-Cyano-7-nitroquinoxaline-2,3-dione                                                              | Glutamate         |        | Antagonist | AMPA/Kainate                      | Yes                 | 10 mg/ml           | Honore, et al., Quinoxalinediones: Potent competitive non-NMDA glutamate receptor antagonists. Science 241, 701 (1988)                                                                                                                                              |
| 05       | G06           | D 1260 | 541-22-0    | 418.30                | Decamethonium dibromide                                   | Decamethylene bis(trimethylammonium bromide)                                                      | Cholinergic       |        | Agonist    | Nicotinic                         |                     |                    | Bertrand, et al., Activation and blocking of neuronal nicotinic acetylcholine receptor reconstituted in Xenopus oocytes. Proc. Natl. Acad. Sci. USA 87, 1993-1997 (1990)                                                                                            |
| 05       | G07           | D 1916 | 53-85-0     | 319.15                | D-ribofuranosylbenzimidazole                              | DRB; 5,6-Dichlorobenzimidazole riboside                                                           | Transcription     |        | Inhibitor  |                                   |                     |                    | Bradley J., and Sporns, O., BDNF-dependent enhancement of exocytosis in cultured cortical neurons requires translation but not transcription. Brain Res. 815, 140-149 (1999)                                                                                        |

| Rack No. | Rack Position | CATNUM | CAS number  | Mol. Weight Structure | Name                                                             | Secondary Name                                               | Class                | Enzyme | Action     | Selectivity           | Solubility in Water | Solubility in DMSO | Reference                                                                                                                                                                                                                              |
|----------|---------------|--------|-------------|-----------------------|------------------------------------------------------------------|--------------------------------------------------------------|----------------------|--------|------------|-----------------------|---------------------|--------------------|----------------------------------------------------------------------------------------------------------------------------------------------------------------------------------------------------------------------------------------|
| 05       | G08           | D 3634 | 431-03-8    | 86.09                 | 2,3-Butanedione                                                  | Biacetyl; BDM                                                | Cytoskeleton and ECM | Enzyme | Inhibitor  | Myosin ATPase         |                     |                    | Eriksson, O., et al., J Biol Chem. 1998 May 15;273(20):12669-74                                                                                                                                                                        |
| 05       | G09           | D 4268 | 65005-57-4  | 238.72                | N <sup>α</sup> G,N <sup>α</sup> G-Dimethylarginine hydrochloride | asym-Dimethylarginine hydrochloride ADMA                     | Nitric Oxide         | Enzyme | Inhibitor  | NOS                   |                     |                    | Vallance, P., et al., Lancet 339, 572 (1992)                                                                                                                                                                                           |
| 05       | G10           | D 5385 | 611-59-6    | 180.17                | 1,7-Dimethylxanthine                                             | Paraxanthine                                                 | Adenosine            |        | Antagonist | A1 > A2               | Yes                 | 1.0 mg/ml          | Ferre, et al., Paraxanthine displaces the binding of [3H]SCH-23390 from rat striatal membranes Eur. J. Pharmacol. 179, 295-299 (1990)                                                                                                  |
| 05       | G11           | D 5886 | 62-32-8     | 203.67                | N-Methyldopamine hydrochloride                                   | Epinine hydrochloride; Deoxyepinephrine hydrochloride        | Dopamine             |        | Agonist    |                       | Yes                 |                    | Prados, P., et al., A fully automated HPLC method for the determination of catecholamines in biological samples utilizing ethylenediamine condensation and peroxyoxalate chemiluminescence detection Biomed. Chromatogr. 8, 1-8 (1994) |
| 05       | H02           | C-102  | 35873-49-5  | 248.29                | 8-Cyclopentyl-1,3-dimethylxanthine                               | CPT; 8-Cyclopentyltheophylline                               | Adenosine            |        | Antagonist | A1                    | Slightly Soluble    | <0.28 mg/ml        | Bruns, Adenosine antagonism by purines, pteridines and benzopteridines in human fibroblasts Biochem. Pharmacol. 30, 325 (1981)                                                                                                         |
| 05       | H03           | C-130  | 80751-65-1  | 410.74                | (±)-Chloro-APB hydrobromide                                      | (±)-SKF-82958 hydrobromide                                   | Dopamine             |        | Agonist    | D1                    | Yes                 | 3.7 mg/ml          | Pfeiffer, et al., Dopaminergic activity of substituted 6-chloro-1-phenyl-2,3,4,5-tetrahydro-1H-3-benzazepines. J. Med. Chem. 25, 352 (1982)                                                                                            |
| 05       | H04           | C-197  | 147700-11-6 | 330.78                | 8-(3-Chlorostyryl)caffeine                                       | CSC                                                          | Adenosine            |        | Antagonist | A2A                   |                     |                    | Jacobson, et al., 8-(3-Chlorostyryl)caffeine (CSC) is a selective A2-adenosine antagonist in vitro and in vivo. FEBS Lett. 323, 141-144 (1993)                                                                                         |
| 05       | H05           | C-271  |             | 247.30                | CX 546                                                           | 1-(1,4-Benzodioxan-6-ylcarbonyl)piperidine                   | Glutamate            |        | Modulator  | AMPA                  | Yes                 | 0.3 mg/ml          | Rogers, et al., Ampakines: Labelling with 11C for PET distribution studies J. Labelled Compd. Radiopharm. 40, 645-647 (1997)                                                                                                           |
| 05       | H06           | D 1262 | 102783-36-8 | 887.49                | P1,P4-Di(adenosine-5')tetraphosphate triammonium                 | Ap4A                                                         | Biochemistry         |        | Inhibitor  |                       | Yes                 | 50 mg/ml           | Ogilvie, A., et al., Adenine dinucleotides: a novel class of signalling molecules. J. Auton. Pharmacol. 16, 325-328 (1996)                                                                                                             |
| 05       | H07           | D 2064 |             | 766.60                | Dequalinium analog, C-14 linker                                  | C14 Linker; DECA-14; Quinolinium                             | Phosphorylation      | Enzyme | Inhibitor  | PKC-alpha             |                     |                    | Sullivan, R.M., Mol. Pharmacol. 58, 729 (2000)                                                                                                                                                                                         |
| 05       | H08           | D 3648 | 10465-78-8  | 172.19                | N,N,N',N'-Tetramethylazodicarboxamide                            | Azodicarboxylic acid bis(dimethylamide); diamide             | Cell Stress          |        | Modulator  | Thiols                |                     |                    | Kosower, N.S., et al., Biochem. Biophys. Res. Comm. 37, 593 (1969)                                                                                                                                                                     |
| 05       | H09           | D 4434 | 22560-50-5  | 288.86                | Clodronic acid                                                   | Cl2MDP; Clodronic acid disodium magnesium salt; DMDP         | Cytoskeleton and ECM | Enzyme | Inhibitor  | MMP1 / collagenase    |                     |                    | Van Rooijen, N., J. Immunol. Meth. 124, 1 (1989)                                                                                                                                                                                       |
| 05       | H10           | D 5439 | 6956-96-3   | 218.21                | 2,3-Dimethoxy-1,4-naphthoquinone                                 | DMNQ                                                         | Cell Stress          |        | Modulator  |                       |                     |                    | Dypbukt, J.M., Different prooxidant levels stimulate growth, trigger apoptosis, or produce necrosis of insulin-secreting RINm5F cells. J. Biol. Chem. 269, 30553 (1994)                                                                |
| 05       | H11           | D 5891 | 54-77-3     | 318.20                | 1,1-Dimethyl-4-phenyl-piperazinium iodide                        | DMPP                                                         | Cholinergic          |        | Agonist    |                       | Yes                 | 21 mg/ml           | Vizi, E.S., and Lendvai, B., Modulatory role of presynaptic nicotinic receptors in synaptic and non-synaptic chemical communication in the central nervous system. Brain Res. Rev. 30, 219-235 (1999)                                  |
| 06       | A02           | D 5919 | 93076-89-2  | 459.59                | Diacylglycerol kinase inhibitor I                                | R 59022                                                      | Phosphorylation      | Enzyme | Inhibitor  | Diacylglycerol kinase | Insoluble           |                    | de Chaffoy de Courcelles, D., et al., R59022, a diacylglycerol kinase inhibitor. Its effect on diacylglycerol and thrombin-induced C kinase activation in the intact platelet. J. Biol. Chem. 260, 15762 (1985)                        |
| 06       | A03           | D 7644 | 3737-09-5   | 339.48                | Disopyramide                                                     | alpha-Diisopropylaminoethyl-alpha-phenylpyridine-2-acetamide | Na+ Channel          |        | Blocker    |                       |                     |                    | Nakagawa, T., et al., Br J Clin Pharmacol. 2003 Dec; 56(6):664-9                                                                                                                                                                       |
| 06       | A04           | D 8065 | 151606-30-3 | 168.15                | Dephostatin                                                      | 2-(N-methyl-N-nitroso)hydroquinone                           | Phosphorylation      | Enzyme | Inhibitor  | CD45 Tyrosine Kinase  | Insoluble           |                    | Imoto, M., et al., Dephostatin, a novel protein tyrosine phosphatase inhibitor produced by Streptomyces. I. Taxonomy, isolation and characterization. Vitamin E: A Comprehensive Treatise 46, 1342 (1993)                              |
| 06       | A05           | D 9035 | 364-98-7    | 230.67                | Diazoxide                                                        |                                                              | K+ Channel           |        | Activator  | ATP-sensitive         | Insoluble           |                    | Grimmsmann, T., et al., Br. J. Pharmacol. 123, 781 (1998)                                                                                                                                                                              |
| 06       | A06           | D 9891 | 24390-14-5  | 480.91                | Doxycycline hydrochloride                                        |                                                              | Antibiotic           |        |            | Protein synthesis     |                     |                    | Duivenvoorden, W.C., et al., Cancer Res. 2002 Mar 15;62(6):1588-91                                                                                                                                                                     |
| 06       | A07           | D-042  | 18426-17-0  | 374.28                | R(-)-N-Allylnorapomorphine hydrobromide                          |                                                              | Dopamine             |        | Agonist    |                       | Yes                 | 0.29 mg/ml         | Hensiak, et al., N-Allylnorapomorphine. J. Med. Chem. 8, 557 (1965)                                                                                                                                                                    |

| Rack No. | Rack Position | CATNUM  | CAS number | Mol. Weight Structure | Name                                         | Secondary Name                                                         | Class                 | Enzyme | Action     | Selectivity            | Solubility in Water | Solubility in DMSO | Reference                                                                                                                                                                                                                                                              |
|----------|---------------|---------|------------|-----------------------|----------------------------------------------|------------------------------------------------------------------------|-----------------------|--------|------------|------------------------|---------------------|--------------------|------------------------------------------------------------------------------------------------------------------------------------------------------------------------------------------------------------------------------------------------------------------------|
| 06       | A08           | D-104   | 1952-15-4  | 451.35                | 4-DAMP methiodide                            | 4-Diphenylacetoxo-N-methylpiperidine methiodide                        | Cholinergic           |        | Antagonist | M3                     | Yes                 | 3.0 mg/ml          | Cembala, T.M., et al., Interaction of neuromuscular blocking drugs with recombinant human m1-m5 muscarinic receptors expressed in Chinese hamster ovary cells Br. J. Pharmacol. 125, 1088-1094 (1998)                                                                  |
| 06       | A09           | D-132   | 74885-25-9 | 403.48                | N,N-Dipropyl-5-carboxamidotryptamine maleate |                                                                        | Serotonin             |        | Agonist    | 5-HT1A                 | Yes                 |                    | Schoeffter, P., Hoyer, D., Centrally acting hypotensive agents with affinity for 5-HT1A binding sites inhibit forskolin-stimulated adenylate cyclase activity in calf hippocampus Br. J. Pharmacol. 95, 975 (1988)                                                     |
| 06       | A10           | D-155   | 24730-10-7 | 707.85                | Dihydroergocristine methanesulfonate         |                                                                        | Dopamine              |        | Agonist    |                        | Yes                 | 10 mg/ml           | Drago, et al. Pharmacol Biochem Behav. 1988;30:961-965.                                                                                                                                                                                                                |
| 06       | A11           | E 1279  | 77671-31-9 | 248.31                | Enoximone                                    | 1,3-Dihydro-4-methyl-5-[4-methylthiobenzoyl]-2H-imidazol-2-one         | Cyclic Nucleotides    | Enzyme | Inhibitor  | PDE III                |                     |                    | Abdel-aleem, S., et al., Effects of phosphodiesterase inhibitors on glucose utilization in isolated cardiac myocytes Mol. Cell Biochem. 180, 129-135 (1998)                                                                                                            |
| 06       | B02           | D 6035  | 22059-60-5 | 437.48                | Disopyramide phosphate                       |                                                                        | K+ Channel            |        | Modulator  |                        |                     |                    | Hanada, E., et al., J Pharm Pharmacol. 2003 Jul;55(7):995-1002                                                                                                                                                                                                         |
| 06       | B03           | D 7802  | 486-66-8   | 254.24                | Daidzein                                     | 7-Hydroxy-3-(4-hydroxyphenyl)-4H-1-benzopyran-4-one                    | Cell Cycle            | Enzyme | Inhibitor  | Aldehyde dehydrogenase |                     |                    | Sargeant, P., et al., ADP- and thapsigargin-evoked Ca2+ entry and protein-tyrosine phosphorylation are inhibited by the tyrosine kinase inhibitors genistein and methyl-25-dihydroxycinnamate in fura-2-loaded human platelets. J. Biol. Chem. 268, 18151-18156 (1993) |
| 06       | B04           | D 8190  | 1166-01-4  | 425.11                | 3',4'-Dichlorobenzamil                       | L-594,881                                                              | Ion Pump              |        | Inhibitor  | Na+/Ca2+ exchanger     | Insoluble           |                    | Ponte, C.G. et al., Eur. J. Pharmacol. 391, 11-20 (2001)                                                                                                                                                                                                               |
| 06       | B05           | D 9128  | 102-32-9   | 168.15                | 3,4-Dihydroxyphenylacetic acid               | DOPAC                                                                  | Dopamine              |        | Metabolite |                        | Yes                 |                    | Dluzen, D.E., Anderson, L.I., The effects of nicotine on dopamine and DOPAC output from rat striatal tissue. Eur. J. Pharmacol. 341, 23 (1998)                                                                                                                         |
| 06       | B06           | D-002   | 73304-33-3 | 260.13                | 6,7-ADTN hydrobromide                        | (±)-2-Amino-6,7-dihydroxy-1,2,3,4-tetrahydro-naphthalene hydrobromide  | Dopamine              |        | Agonist    |                        | Yes                 | >7.3 mg/ml         | List, et al., Striatal binding of 2-amino-6,7-[3H]-dihydroxy-1234-tetrahydronaphthalene to two dopaminergic sites distinguished by their low and high affinity for neuroleptics. J. Neurosci. 2, 895 (1982)                                                            |
| 06       | B07           | D-044   | 15180-02-6 | 308.34                | Amfonelic acid                               | 7-Benzyl-1-ethyl-1,4-dihydro-4-oxo-1,8-naphthyridine-3-carboxylic acid | Dopamine              |        | Modulator  |                        | Slightly Soluble    |                    | Juorio, A.V., The effects of amfonelic acid and some other central stimulants on mouse striatal tyramine dopamine and homovanillic acid Br. J. Pharmacol. 77, 511 (1982)                                                                                               |
| 06       | B08           | D-108   | 31542-63-9 | 250.30                | 1,3-Dipropyl-7-methylxanthine                |                                                                        | Adenosine             |        | Antagonist | A2                     |                     |                    | Ukena, et al., Analogs of caffeine: Antagonists with selectivity for A2 adenosine receptors. Life Sci. 39, 743 (1986)                                                                                                                                                  |
| 06       | B09           | D-133   | 25983-13-5 | 231.04                | 6,7-Dichloroquinoxaline-2,3-dione            | DCQX                                                                   | Glutamate             |        | Antagonist | NMDA-glycine           |                     |                    | Ogita, K., and Yoneda, Y., 6,7-Dichloroquinoxaline-2,3-dione is a competitive antagonist specific to strychnine-insensitive [3H]glycine binding sites on the N-methyl-D-aspartate receptor complex. J. Neurochem. 54, 699-702 (1990)                                   |
| 06       | B10           | D1920-6 | 56-06-4    | 126.12                | 2,6-Diamino-4-pyrimidinone                   | DAHP; 2,4-Diamino-6-hydroxypyrimidine                                  | Phosphorylation       | Enzyme | Inhibitor  | GTP cyclohydrolase I   |                     |                    |                                                                                                                                                                                                                                                                        |
| 06       | B11           | E 1383  | 33419-42-0 | 588.57                | Etoposide                                    | Lastet                                                                 | Apoptosis             | Enzyme | Inhibitor  | Topo II                |                     |                    | Chow, K.C., and Ross, W.E., Topoisomerase-specific drug sensitivity in relation to cell cycle progression Mol. Cell. Biol. 7, 3119-3123 (1987)                                                                                                                         |
| 06       | C02           | D 6140  | 64-73-3    | 501.32                | Demeclocycline hydrochloride                 | 7-chloro-6-demethyltetracycline hydrochloride                          | Antibiotic            |        |            | Protein synthesis      |                     |                    | Jirji, M.R., et al., Br J Pharmacol. 1991 Oct;104(2):550-3                                                                                                                                                                                                             |
| 06       | C03           | D 7814  |            | 275.31                | Dubininide                                   |                                                                        | Anticonvulsant        |        |            |                        |                     |                    | Bessonova, et al., Chem. Nat. Cpds. 5, 626 (1971)                                                                                                                                                                                                                      |
| 06       | C04           | D 8296  | 6736-58-9  | 252.23                | 3-deazaadenosine                             | 4-Amino-1-(beta-D-ribofuranosyl)-1H-imidazo(4,5)-pyridine              | Immune System         |        | Inhibitor  |                        | Yes                 | 10 mg/ml           | Jurgensen, C.H., et al., J. Immunol. 144, 653 (1990)                                                                                                                                                                                                                   |
| 06       | C05           | D 9175  | 14663-23-1 | 336.24                | Dantrolene sodium                            | 1-[(5-(p-Nitrophenyl)furfurylidene)amino]hydantoin                     | Intracellular Calcium |        | Inhibitor  | Release                |                     |                    | Song, S.K., et al., Proc. Natl. Acad. Sci. USA 90, 3933 (1993)                                                                                                                                                                                                         |
| 06       | C06           | D-003   | 641-36-1   | 317.82                | R(-)-Apocodeine hydrochloride                | R(-)-10-Methoxy-11-hydroxyaporphine hydrochloride                      | Dopamine              |        | Agonist    |                        | Very Soluble        |                    | Gessa, et al., eds., Apomorphine and Other Dopaminomimetics, New York, NY, USA (1981), Vols. 1 and 2,                                                                                                                                                                  |

| Rack No. | Rack Position | CATNUM  | CAS number  | Mol. Weight Structure | Name                                           | Secondary Name                                                                                                              | Class             | Enzyme | Action     | Selectivity             | Solubility in Water | Solubility in DMSO | Reference                                                                                                                                                                            |
|----------|---------------|---------|-------------|-----------------------|------------------------------------------------|-----------------------------------------------------------------------------------------------------------------------------|-------------------|--------|------------|-------------------------|---------------------|--------------------|--------------------------------------------------------------------------------------------------------------------------------------------------------------------------------------|
| 06       | C07           | I 9532  |             | 311.30                | Icilin                                         | AG-3-5; 1-(2-Hydroxyphenyl)-4-(3-nitrophenyl)-1,2,3,6-tetrahydropyrimidin-2-one                                             | Neurotransmission |        | Agonist    | CMR1                    |                     |                    | McKemy, D.D. et al. Nature 416, 52-58 (2002)                                                                                                                                         |
| 06       | C08           | D-122   | 57808-66-9  | 425.92                | Domperidone                                    |                                                                                                                             | Dopamine          |        | Antagonist | D2                      | Insoluble           |                    | Laduron, P.M., and Leysen, J.E., Domperidone, a specific in vitro dopamine antagonist, devoid of in vivo central dopaminergic activity Biochem. Pharmacol. 28, 2161-2165 (1979)      |
| 06       | C09           | D-134   | 14114-46-6  | 218.22                | 3,7-Dimethyl-1-propargylxanthine               | DMPX                                                                                                                        | Adenosine         |        | Antagonist | A2                      | Yes                 | 1.1 mg/ml          | Ukena, et al., Analogs of caffeine: Antagonists with selectivity for A2adenosine receptors. Life Sci. 39, 743-750 (1986)                                                             |
| 06       | C10           | D-193   | 70052-12-9  | 218.63                | DL-alpha-Difluoromethylornithine hydrochloride | DFMO hydrochloride                                                                                                          | Angiogenesis      | Enzyme | Inhibitor  | ODC                     | Yes                 | >20 mg/ml          | Jasnis, M.A., et al., Polyamines prevent DFMO-mediated inhibition of angiogenesis. Cancer Lett. 79, 39-43 (1994)                                                                     |
| 06       | C11           | E 1779  |             | 523.74                | ET-18-OCH3                                     | 3,5,9-Trioxa-4-phosphaheptacosan-1-aminium                                                                                  | Lipid             | Enzyme | Inhibitor  | PIPLC                   | Yes                 | 17 mg/ml           | Jan, C.R., et al., Br J Pharmacol. 1999 Jul;127(6):1502-10                                                                                                                           |
| 06       | D02           | D 6518  | 67-43-6     | 393.35                | Diethylenetriaminepentaacetic acid             | Pentetic acid; DTPA                                                                                                         | Biochemistry      | Enzyme | Inhibitor  | Zn2+-dependent protease |                     |                    | Sciaudone, M.P., et al., Biol Trace Elem Res. 2004 Jul;99(1-3):219-32                                                                                                                |
| 06       | D03           | D 7909  | 67-32-5     | 345.96                | Dicyclomine hydrochloride                      | 2-(Diethylamino)ethyl 1-cyclohexylcyclohexane-1-carboxylate hydrochloride                                                   | Cholinergic       |        | Antagonist | Muscarinic              | Yes                 | 50 mg/ml           | Eltze, M., Galvan, M., Involvement of muscarinic M2and M3, but not of M1and M4receptors in vagally stimulated contractions of rabbit bronchus/trachea Pulm. Pharmacol. 7, 109 (1994) |
| 06       | D04           | G 5168  | 39025-23-5  | 312.46                | (Z)-Guggulesterone                             | trans-4,17(20)-Pregnadiene-3,16-dione                                                                                       | Lipid Signaling   |        | Antagonist | FRX                     |                     |                    | Urizar, N. L., et al, A natural product that lowers cholesterol as an antagonist ligand for the FXR. Science 296, 1703-1706 (2000)                                                   |
| 06       | D05           | D 9190  | 60563-36-2  | 231.08                | DCEBIO                                         | 5,6-Dichloro-1-ethyl-1,3-dihydro-2H-benzimidazol-2-one                                                                      | K+ Channel        |        | Activator  | hK1                     |                     |                    | Singh, S. et al., J. Pharmacol. Exp. Ther. 296, 600-611 (2001)                                                                                                                       |
| 06       | D06           | D-027   | 18426-20-5  | 331.85                | R(-)-Propylnorapomorphine hydrochloride        | R(-)-NPA hydrochloride                                                                                                      | Dopamine          |        | Agonist    | D2                      | Moderately Soluble  |                    | Creese, et al., N-Propylnorapomorphine[3H]: A novel agonist ligand for central dopamine receptors. Eur. J. Pharmacol. 56, 411 (1979)                                                 |
| 06       | D07           | D-047   | 81633-77-4  | 291.78                | (±)-SKF-38393 hydrochloride                    | (±)-1-Phenyl-2,3,4,5-tetrahydro-(1H)-3-benzazepine-7,8-diol hydrochloride                                                   | Dopamine          |        | Antagonist | D1                      | Yes                 | 10 mg/ml           | Ongini, E., et al., Stimulation of dopamine D-1 receptors by SKF-38393 induces EEG desynchronization and behavioral arousal. Life Sci. 37, 2327 (1985)                               |
| 06       | D08           | D126608 | 2078-54-8   | 178.28                | Propofol                                       |                                                                                                                             | Cholinergic       |        | Inhibitor  | Muscarinic              |                     |                    | Trapani, G., Curr Med Chem. 2000 Feb;7(2):249-71                                                                                                                                     |
| 06       | D09           | D-138   | 131123-76-7 | 258.06                | 5,7-Dichlorokynurenic acid                     | 5,7-Dichloro-4-hydroxyquinoline-2-carboxylic acid                                                                           | Glutamate         |        | Antagonist | NMDA-glycine            | Insoluble           |                    | Baron, et al., Activity of 5,7-dichlorokynurenic acid, a potent antagonist at the N-methyl-D-aspartate receptor-associated glycine binding site. Mol. Pharmacol. 38, 554 (1990)      |
| 06       | D10           | S 4443  |             | 277.33                | SCH-28080                                      | 2-Methyl-8-(phenylmethoxy)imidazo[1,2-a]pyridine-3-acetonitrile                                                             | Ion Pump          | Enzyme | Inhibitor  | H+/K+-ATPase            | Insoluble           |                    | Scott, C.K., and Sundell, E., Eur. J. Pharmacol. 112, 268-270 (1985)                                                                                                                 |
| 06       | D11           | E 1896  | 35838-58-5  | 325.80                | Etazolate hydrochloride                        | SQ 20,009; 1-Ethyl-4-[(1-methylethylidene)hydrazino]-1H-pyrazolo[3,4-b]pyridine-5-carboxylic acid ethyl ester hydrochloride | Adenosine         | Enzyme | Inhibitor  | Phosphodiesterase       | Yes                 | >20 mg/ml          | Bergman, M. R., Pharmacological modulation of myocardial tumor necrosis factor alpha production by phosphodiesterase inhibitors. J. Pharmacol. Exp. Ther. 279, 247 (1996)            |
| 06       | E02           | D 6899  | 15307-79-6  | 318.14                | Diclofenac sodium                              | 2-[(2,6-Dichlorophenyl)amino]benzenecetic acid sodium                                                                       | Prostaglandin     | Enzyme | Inhibitor  | COX                     | Yes                 | 50 mg/ml           | Kobayashi, K., et al., Biochem. Pharmacol. 63, 889-896 (2002)                                                                                                                        |
| 06       | E03           | D 7910  | 51050-59-0  | 215.04                | 3,4-Dichloroisocoumarin                        | 3,4-DCI                                                                                                                     | Biochemistry      | Enzyme | Inhibitor  | Serine Protease         |                     |                    | Harper, J.W., et al., Biochemistry 24, 1831 (1985)                                                                                                                                   |
| 06       | E04           | D 8399  | 17230-88-5  | 337.47                | Danazol                                        |                                                                                                                             | Hormone           |        | Inhibitor  |                         |                     |                    | Katsuki, Y, et al., Toxicol. Lett. 98, 105 (1998)                                                                                                                                    |
| 06       | E05           | D 9305  | 73285-50-4  | 199.64                | 1-Deoxyojirimycin hydrochloride                | DNM; 1,5-Dideoxy-1,5-imino-D-sorbitol hydrochloride                                                                         | Biochemistry      | Enzyme | Inhibitor  | alpha-glucosidase       |                     |                    | Neverova, I., et al., Anal. Biochem. 222, 190 (1994)                                                                                                                                 |

| Rack No. | Rack Position | CATNUM | CAS number  | Mol. Weight Structure | Name                                                                   | Secondary Name                                                                              | Class             | Enzyme | Action            | Selectivity      | Solubility in Water | Solubility in DMSO | Reference                                                                                                                                                                                                                                                                                                 |
|----------|---------------|--------|-------------|-----------------------|------------------------------------------------------------------------|---------------------------------------------------------------------------------------------|-------------------|--------|-------------------|------------------|---------------------|--------------------|-----------------------------------------------------------------------------------------------------------------------------------------------------------------------------------------------------------------------------------------------------------------------------------------------------------|
| 06       | E06           | D-029  | 77630-01-4  | 364.24                | R(-)-2,10,11-Trihydroxyaporphine hydrobromide                          | R(-)-2-Hydroxyapomorphine hydrobromide                                                      | Dopamine          |        | Agonist           | D2               | Yes                 |                    | Neumeyer, et al., Aporphines. 39. Synthesisdopamine receptor bindingand pharmacological activity of (R)-(-) and (S)-(+)-2-hydroxyapomorphine. J. Med. Chem. 25, 990 (1982)                                                                                                                                |
| 06       | E07           | D-052  | 67469-78-7  | 523.50                | GBR-12909 dihydrochloride                                              | 1-[2-[bis(4-Fluorophenyl)methoxy]ethyl]-4-[3-phenylpropyl]piperazine dihydrochloride        | Dopamine          |        | Inhibitor         | Reuptake         | Yes                 | 2.0 mg/ml          | Matecka, D., et al., Development of novel potent and selective dopamine reuptake inhibitors through alteration of the piperazine ring of 1-[2-(diphenylmethoxy)ethyl]- and 1-[2-[bis(4-fluorophenyl)methoxy]ethyl]-4-[3-phenylpropyl]piperazines (GBR 12935 and GBR 12909). J. Med. Chem. 39, 4704 (1996) |
| 06       | E08           | D-127  | 125-73-5    | 407.47                | Dextrorphan D-tartrate                                                 | (+)-3-Hydroxy-N-methylmorphinan D-tartrate                                                  | Glutamate         |        | Antagonist        | NMDA             | Yes                 |                    | Faden, et al., The role of excitatory amino acids and NMDA receptors in traumatic brain injury. Science 244, 798 (1989)                                                                                                                                                                                   |
| 06       | E09           | D-142  | 130817-71-9 | 394.34                | 4-Diphenylacetoxy-N-(2-chloroethyl)piperidine hydrochloride            | 4-DAMP mustard hydrochloride                                                                | Cholinergic       |        | Antagonist        | Muscarinic       |                     |                    | Ehlert, F.J., et al., The quaternary transformation products of N-(3-chloropropyl)-4-piperidyl diphenylacetate and N-(2-chloroethyl)-4-piperidyl diphenylacetate (4-DAMP mustard) have differential affinity for subtypes of the muscarinic receptor J. Pharmacol. Exp. Ther. 276, 405-410 (1996)         |
| 06       | E10           | D-206  |             | 264.80                | S(-)-DS 121 hydrochloride                                              | S(-)-3-(1-Propyl-3-piperidinyl)-benzonitrile hydrochloride                                  | Dopamine          |        | Antagonist        | Autoreceptor     | Yes                 | >10 mg/ml          | Sonesson, et al., Substituted 3-phenylpiperidines: New centrally acting dopamine autoreceptor antagonists. J. Med. Chem. 36, 3188-3196 (1993)                                                                                                                                                             |
| 06       | E11           | C 8863 | 213743-31-8 | 370.46                | 7-Cyclopentyl-5-(4-phenoxy)phenyl-7H-pyrrolo[2,3-d]pyrimidin-4-ylamine |                                                                                             | Phosphorylation   | Enzyme | Inhibitor         | lck              |                     |                    | Arnold, L.D., et al., Pyrrolo[2,3-d]pyrimidines containing an extended 5-substituent as potent and selective inhibitors of lck I. Bioorg. Med. Chem. Lett. 10, 2167-2170 (2000)                                                                                                                           |
| 06       | F02           | D 6908 | 3102-56-5   | 301.52                | DL-erythro-Dihydrosphingosine                                          | DL-Sphinganine                                                                              | Phosphorylation   | Enzyme | Inhibitor         | PKC / PLA2 / PLD |                     |                    | Archibald, Structural studies of lipid fibers formed by sphingosine. Biochim. Biophys. Acta 1166, 154-162 (1993)                                                                                                                                                                                          |
| 06       | F03           | D 7938 | 195211-53-1 | 297.62                | DBO-83                                                                 | 3-(6-Chloro-3-pyridazinyl)-3,8-diazabicyclo[3.2.1]octane dihydrochloride                    | Cholinergic       |        | Agonist           | Nicotinic        | Yes                 | 38 mg/ml           | Ghelardini, C., Antinociceptive profile of the new nicotinic agonist DBO-83 Drug Dev. Res. 40, 251 (1997)                                                                                                                                                                                                 |
| 06       | F04           | D 8555 | 142720-24-9 | 436.62                | N,N-Dihexyl-2-(4-fluorophenyl)indole-3-acetamide                       | FGIN-1-27                                                                                   | Benzodiazepine    |        | Ligand            | Mitochondria     | Insoluble           |                    | Romeo, E., et al., J. Pharmacol. Exp. Ther. 267, 462 (1993)                                                                                                                                                                                                                                               |
| 06       | F05           | D 9628 | 59-92-7     | 197.19                | L-3,4-Dihydroxyphenylalanine                                           | L-DOPA; Levodopa                                                                            | Dopamine          |        | Precursor         |                  |                     |                    | Tabar, et al., The effects on central dopamine function of chronic L-DOPA (methyl ester hydrochloride) treatment of mice Pharmacol. Biochem. Behav. 33, 139 (1989)                                                                                                                                        |
| 06       | F06           | D-030  | 77630-02-5  | 392.30                | R(-)-2,10,11-Trihydroxy-N-propylnoraporphine hydrobromide              | R(-)-TNPA HBr; R(-)-2-OH-NPA hydrobromide                                                   | Dopamine          |        | Agonist           | D2               | Moderately Soluble  |                    | Neumeyer, et al., Aporphines 34. (-)-2,10,11-Trihydroxy-N-n-propylnoraporphine (TNPA) a novel dopaminergic aporphine alkaloid with anticonvulsant activity. J. Med. Chem. 24, 898 (1981)                                                                                                                  |
| 06       | F07           | D-054  | 125941-87-9 | 324.25                | R(+)-SCH-23390 hydrochloride                                           | R(+)-7-Chloro-8-hydroxy-3-methyl-1-phenyl-2,3,4,5-tetrahydro-1H-3-benzazepine hydrochloride | Dopamine          |        | Antagonist        | D1               | Yes                 | 8.0 mg/ml          | Iorio, et al., SCH 23390a potential benzazepine antipsychotic with unique interactions on dopaminergic systems J. Pharmacol. Exp. Ther. 226, 462-468 (1983)                                                                                                                                               |
| 06       | F08           | D-129  | 81166-47-4  | 399.32                | R(+)-Butylindazone                                                     | R(+)-DIOA                                                                                   | Ion Pump          |        | Inhibitor         | K+/Cl- transport | Insoluble           |                    | Garay, et al., The significance of the relative effects of loop diuretics and anti-brain edema agents on the sodium-potassium-chloride cotransport system and the chloride/NaCO3-anion exchanger. Naunyn-Schmiedeberg's Arch. Pharmacol. 334, 202 (1986)                                                  |
| 06       | F09           | D14204 | 646-25-3    | 172.32                | 1,10-Diaminodecane                                                     | DA10; Decamethylenediamine                                                                  | Glutamate         |        | Agonist (inverse) | NMDA-polyamine   |                     |                    | Doyle, K.M., et al., Br J Pharmacol. 1998 May;124(2):386-90                                                                                                                                                                                                                                               |
| 06       | F10           | E 0137 | 304-84-7    | 223.27                | Vanillic acid diethylamide                                             | Ethamivan                                                                                   | Vanilloid         |        | Agonist           |                  |                     |                    | Daiz, P.M., Pentyletetrazol and ethamivan effects on brain serotonin metabolism. Life Sci. 9, 831 (1970)                                                                                                                                                                                                  |
| 06       | F11           | E 2375 | 316-42-7    | 553.58                | Emetine dihydrochloride hydrate                                        |                                                                                             | Apoptosis         |        | Activator         |                  |                     |                    | Galasinski W., et al., The substances of plant origin that inhibit protein biosynthesis. Acta Pol. Pharm. 53, 311-318 (1996)                                                                                                                                                                              |
| 06       | G02           | D 6940 |             | 209.72                | R(-)-Desmethyleprenyl hydrochloride                                    | L-Nordeprenyl hydrochloride                                                                 | Neurotransmission | Enzyme | Inhibitor         | MAO-B            | Yes                 | 22 mg/ml           | Tatton, W.G., et al., Neurology. 1996 Dec;47 (6 Suppl 3):S171-83                                                                                                                                                                                                                                          |



| Rack No. | Rack Position | CATNUM | CAS number  | Mol. Weight Structure | Name                                                   | Secondary Name                                                                                                           | Class             | Enzyme | Action     | Selectivity         | Solubility in Water | Solubility in DMSO | Reference                                                                                                                                                                                                                                |
|----------|---------------|--------|-------------|-----------------------|--------------------------------------------------------|--------------------------------------------------------------------------------------------------------------------------|-------------------|--------|------------|---------------------|---------------------|--------------------|------------------------------------------------------------------------------------------------------------------------------------------------------------------------------------------------------------------------------------------|
| 06       | G03           | D 8008 | 89560-01-0  | 336.56                | 7,7-Dimethyl-(5Z,8Z)-eicosadienoic acid                | DEDA                                                                                                                     | Lipid             | Enzyme | Inhibitor  | PLA2 / Lipoxygenase |                     |                    | Welton, A.F., et al., Prostaglandins 28, 649 (1984)                                                                                                                                                                                      |
| 06       | G04           | D 8690 |             | 320.44                | (R,R)-cis-Diethyl tetrahydro-2,8-chrysenediol          | (5R, 11R)-5,11-Diethyl-5,6,11,12-tetrahydro-2,8-chrysenediol                                                             | Hormone           |        | Antagonist | ER-beta             | Slightly Soluble    |                    | Meyers, M.J. et al., J. Med. Chem. 42, 2456-2468 (1999)                                                                                                                                                                                  |
| 06       | G05           | D 9766 | 58-32-2     | 504.64                | Dipyridamole                                           |                                                                                                                          | Adenosine         |        | Inhibitor  |                     |                     |                    | Thorn, J.A., and Jarvis, S.M., Adenosine transporters Gen. Pharmacol. 27, 613-620 (1996)                                                                                                                                                 |
| 06       | G06           | D-031  | 65273-66-7  | 318.26                | Dipropylodopamine hydrobromide                         |                                                                                                                          | Dopamine          |        | Agonist    |                     |                     |                    | Cavero, et al., Peripheral dopamine receptors, potential targets for a new class of anti-hypertensive agents. Part II: Sites and mechanisms of action of dopamine receptor agonists. Life Sci. 31, 1059 (1982)                           |
| 06       | G07           | D-101  | 82830-44-2  | 357.62                | (±)-DOI hydrochloride                                  | (±)-2,5-Dimethoxy-4-iodoamphetamine hydrochloride                                                                        | Serotonin         |        | Agonist    | 5-HT2/5-HT1C        | Yes                 | 10 mg/ml           | Ichikawa, J., et al., DOI, a 5-HT2A/2C receptor agonist, potentiates amphetamine-induced dopamine release in rat striatum Brain Res. 698, 204-208 (1995)                                                                                 |
| 06       | G08           | D-130  | 120442-40-2 | 521.58                | DPMA                                                   | PD-125944                                                                                                                | Adenosine         |        | Agonist    | A2                  | Insoluble           |                    | Bridges, N6-[2-(3,5-Dimethoxyphenyl)-2-(2-methylphenyl)-ethyl]adenosine and its uronamide derivatives. Novel adenosine agonists with both high affinity and high selectivity for the adenosine A2 receptor J. Med. Chem. 31, 1282 (1988) |
| 06       | G09           | D-149  | 23255-54-1  | 356.26                | Dihydro-beta-erythroidine hydrobromide                 | 3beta-1,6-Didehydro-14,17-dihydro-3-methoxy-16(15H)-oxaerythrinan-15-one hydrobromide                                    | Cholinergic       |        | Antagonist | nAch                | Yes                 | 800 mg/ml          | Rapier, C, et al., Nicotinic modulation of [3H]dopamine release from striatal synaptosomes: pharmacological characterization. J. Neurochem. 54, 937-945 (1990)                                                                           |
| 06       | G10           | E 0381 | 100992-60-7 | 344.84                | Epibestatin hydrochloride                              | [(2R,3R)-3-Amino-2-hydroxy-4-phenylbutanoyl]-L-leucine hydrochloride                                                     | Biochemistry      | Enzyme | Inhibitor  | Metalloprotease     |                     |                    |                                                                                                                                                                                                                                          |
| 06       | G11           | E 2387 | 35920-39-9  | 308.30                | 5'-N-Ethylcarboxamidoadenosine                         | NECA                                                                                                                     | Adenosine         |        | Agonist    | A1/A2               | Insoluble           |                    | Cusack, et al., 5'-N-Ethylcarboxamidoadenosine - a potent inhibitor of human platelet aggregation Br. J. Pharmacol. 72, 443 (1981)                                                                                                       |
| 06       | H02           | D 7505 | 366-18-7    | 156.19                | 2,2'-Bipyridyl                                         | alpha, alpha'-Bipyridyl                                                                                                  | Biochemistry      | Enzyme | Inhibitor  | Metalloprotease     |                     |                    |                                                                                                                                                                                                                                          |
| 06       | H03           | D 8040 | 83913-05-7  | 465.44                | (±) trans-U-50488 methanesulfonate                     | trans-(±)-3,4-Dichloro-N-methyl-N-[2-(1-pyrrolidinyl)cyclohexyl]-benzeneacetamide methanesulfonate                       | Opioid            |        | Agonist    | kappa               | Yes                 | 50 mg/ml           | Yu, X.C., et al., Anti-arrhythmic effect of kappa-opioid receptor stimulation in the perfused rat heart: involvement of a cAMP-dependent pathway. J. Mol. Cell. Cardiol. 31, 1809-1819 (1999)                                            |
| 06       | H04           | S 5567 |             | 220.23                | SP600125                                               | Anthrapyrazolone; 1,9-Pyrazoloanthrone                                                                                   | Phosphorylation   | Enzyme | Inhibitor  | c-JNK               | Insoluble           |                    | Bennett, B.L., et al., SP600125, an anthrapyrazolone inhibitor of Jun N-terminal kinase Proc. Natl. Acad. Sci. USA 98, 13681-13686 (2001)                                                                                                |
| 06       | H05           | D 9815 | 77883-43-3  | 547.59                | Doxazosin mesylate                                     | 1-(4-amino-6,7-dimethoxy-2-quinazolinyl)-4-[4-(1,4-benzodioxan-2-yl)carpiperazin-1-yl]-6,7-dimethoxyquinazoline mesylate | Adrenoceptor      |        | Blocker    | alpha 1             |                     |                    | Conley, R.K. et al., Br. J. Pharmacol. 133, 61-72 (2001)                                                                                                                                                                                 |
| 06       | H06           | D-033  | 55528-07-9  | 397.99                | (+)-Butaclamol hydrochloride                           |                                                                                                                          | Dopamine          |        | Antagonist |                     | Yes                 | 0.25 mg/ml         | Lippman, et al., Effect of butaclamol and its enantiomers upon striatal homovanillic acid and adenylyl cyclase of olfactory tubercle in rats. Life Sci. 16, 213-224 (1975)                                                               |
| 06       | H07           | D-103  | 39226-94-3  | 226.53                | (±)-2,3-Dichloro-alpha-methylbenzylamine hydrochloride | DCMB hydrochloride; LY-78335                                                                                             | Neurotransmission | Enzyme | Inhibitor  | PNMT                | Yes                 |                    | Fuller, R.W., Lowering of epinephrine concentration in rat brain by 2,3-dichloro-α-methylbenzylamine, an inhibitor of norepinephrine N-methyltransferase. Biochem. Pharmacol. 26, 2087 (1977)                                            |
| 06       | H08           | D-131  | 7659-29-2   | 200.11                | 3,5-Dinitrocatechol                                    | OR-486                                                                                                                   | Neurotransmission | Enzyme | Inhibitor  | COMT                | Slightly Soluble    | 0.17 mg/ml         | Nissinen, et al., Inhibition of catechol-O-methyltransferase activity by two novel disubstituted catechols in the rat Eur. J. Pharmacol. 153, 263 (1988)                                                                                 |
| 06       | H09           | D-153  | 82864-02-6  | 357.62                | (R)-(-)-DOI hydrochloride                              | (-)-2,5-Dimethoxy-4-iodoamphetamine hydrochloride                                                                        | Serotonin         |        | Agonist    | 5-HT2               | Yes                 |                    | Johnson, et al., [125I]-2-(2,5-Dimethoxy-4-iodophenyl)aminoethane ([125I]-2C-I) as a label for the 5-HT2 receptor in rat frontal cortex. Pharmacol. Biochem. Behav. 35, 211 (1989)                                                       |
| 06       | H10           | E 0516 | 41340-25-4  | 287.36                | Etodolac                                               | 1,8-Diethyl-1,3,4,9-tetrahydropyrano[3,4-b]indole-1-acetic acid                                                          | Prostaglandin     | Enzyme | Inhibitor  | COX                 |                     |                    | Giuliano, F., et al., Cyclooxygenase selectivity of non-steroid anti-inflammatory drugs in humans: ex vivo evaluation. Eur. J. Pharmacol. 426, 95-103 (2001)                                                                             |

| Rack No. | Rack Position | CATNUM | CAS number  | Mol. Weight Structure | Name                                                 | Secondary Name                                                                                       | Class              | Enzyme | Action     | Selectivity              | Solubility in Water | Solubility in DMSO | Reference                                                                                                                                                                                               |
|----------|---------------|--------|-------------|-----------------------|------------------------------------------------------|------------------------------------------------------------------------------------------------------|--------------------|--------|------------|--------------------------|---------------------|--------------------|---------------------------------------------------------------------------------------------------------------------------------------------------------------------------------------------------------|
| 06       | H11           | E 3132 | 66701-25-5  | 357.41                | E-64                                                 | L-trans-3-Carboxyoxiran-2-carbonyl-L-leucylagmatine                                                  | Biochemistry       | Enzyme | Inhibitor  | Cysteine protease        |                     |                    | Beynon, R.J. and Bond, J.S., ed., Proteolytic Enzymes: A Practical Approach, New York, NY (1989), 244                                                                                                   |
| 07       | A02           | S 3567 | 264218-23-7 | 359.73                | SB 415286                                            | 3-((3-Chloro-4-hydroxyphenyl)amino)-4-(2-nitrophenyl)-1H-pyrrol-2,5-dione                            | Phosphorylation    | Enzyme | Inhibitor  | GSK-3                    | Insoluble           |                    | Coughlan, M.P., et al, Selective small molecule inhibitors of glycogen synthase kinase-3 modulate glycogen metabolism and gene transcription. Chem. Biol. 10, 793-803 (2000)                            |
| 07       | A03           | E 3770 | 163702-18-9 | 550.77                | rac-2-Ethoxy-3-octadecanamido-1-propylphosphocholine |                                                                                                      | Phosphorylation    | Enzyme | Inhibitor  | PKC                      |                     |                    | Marx, M.H., et al, J. Med. Chem. 31, 858 (1988)                                                                                                                                                         |
| 07       | A04           | E 8375 | 57-47-6     | 275.35                | (-)-Physostigmine                                    | Eserine                                                                                              | Cholinergic        | Enzyme | Inhibitor  | Cholinesterase           |                     |                    | Johansson, M., and Nordberg, A., Pharmacokinetic studies of cholinesterase inhibitors Acta Neurol. Scand 149, 22-125 (1993)                                                                             |
| 07       | A05           | E-101  | 97612-24-3  | 377.31                | S-(-)-Eticlopride hydrochloride                      | FLB 131                                                                                              | Dopamine           |        | Antagonist | D2                       | Yes                 | 12 mg/ml           | Hall, et al., Some in vitro receptor binding properties of [3H]-eticlopride, a novel substituted benzamide selective for dopamine D2 receptors in the rat brain. Eur. J. Pharmacol. 111, 191-199 (1985) |
| 07       | A06           | F 1678 |             | 345.80                | R-(-)-Fluoxetine hydrochloride                       |                                                                                                      | Serotonin          |        | Inhibitor  | Reuptake                 | Yes                 | 20 mg/ml           | Wong, D.T. et al., Neuropsychopharmacology 5, 43-47 (1991)                                                                                                                                              |
| 07       | A07           | F 6020 | 45962-28-9  | 360.84                | Fenofibrate                                          | 2-[4-(4-Chlorobenzoyl)phenoxy]-2-methylpropanoic acid 1-methyl-ethyl ester                           | Transcription      |        | Agonist    | PPAR-alpha               |                     |                    | Chaput, et al., Fenofibrate protects lipoproteins from lipid peroxidation: synergistic interaction with alpha-tocopherol. Lipids 34, 497-502 (1999)                                                     |
| 07       | A08           | F 6886 | 66575-29-9  | 410.51                | Forskolin                                            |                                                                                                      | Cyclic Nucleotides | Enzyme | Activator  | Adenylate cyclase        |                     |                    | Huang, R.D., Inhibition of forskolin-activated adenylate cyclase by ethanol and other solvents. J. Cyclic Nucl. Res. 8, 385 (1982)                                                                      |
| 07       | A09           | F 9427 |             | 501.67                | Fexofenadine hydrochloride                           | Terfenidine carboxylate, MDL 16455                                                                   | Histamine          |        | Antagonist | H1                       |                     |                    | Mattila, M.J. et al., Eur. J. Clin. Pharmacol. 55, 85-93 (1999)                                                                                                                                         |
| 07       | A10           | D 8816 |             | 268.36                | N-(3,3-Diphenylpropyl)glycinamide                    | N20C                                                                                                 | Glutamate          |        | Blocker    | NMDA                     |                     |                    | Planells-Cases, R. et al., J. Pharmacol. Exp. Ther. 302, 163-173 (2002)                                                                                                                                 |
| 07       | A11           | G 4788 | 1072-13-5   | 398.19                | Guanidinoethyl disulfide dihydrobromide              | GED dihydrobromide                                                                                   | Nitric Oxide       | Enzyme | Inhibitor  | iNOS                     |                     |                    | Szabo, C., et al., Br. J. Pharmacol. 118, 1659 (1996)                                                                                                                                                   |
| 07       | B02           | E 3149 | 1071-37-0   | 185.09                | S-Ethylisothiourea hydrobromide                      | 2-Ethyl-2-thioseoudourea hydrobromide                                                                | Nitric Oxide       | Enzyme | Inhibitor  | NOS                      |                     |                    | Garvey, E.P., et al., J. Biol. Chem. 269, 26669 (1994)                                                                                                                                                  |
| 07       | B03           | E 3876 | 128-53-0    | 125.13                | N-Ethylmaleimide                                     | NEM                                                                                                  | Biochemistry       | Enzyme | Inhibitor  | Isocitrate dehydrogenase |                     |                    | Riordan, J.F. and Vallee, B.L., Reagent for the modification of sulfhydryl groups in proteins Meth. Enzymol. 25, 449-456 (1972)                                                                         |
| 07       | B04           | N 3911 | 184241-44-9 | 434.20                | NBI 27914                                            | 5-Chloro-4-(N-(cyclopropyl)methyl-N-propylamino)-2-methyl-6-(2,4,6-trichlorophenyl)-aminopyridine    | Neurotransmission  |        | Antagonist | CRF1                     | Insoluble           |                    | Maciejewski, L.D. et al., Endocrinology 141(2), 498-504 (2000)                                                                                                                                          |
| 07       | B05           | E-111  |             | 361.40                | (S)-ENBA                                             | PD-126280; ((2S)-N6-[2-endo-Norbonyl]adenosine                                                       | Adenosine          |        | Agonist    | A1                       | Insoluble           | 0.01 mg/ml         | Trivedi et al., N6-Bicycloalkyladenosines with unusually high potency and selectivity for the adenosine A1 receptor. J. Med. Chem. 32, 8 (1989)                                                         |
| 07       | B06           | F 2802 | 61718-82-9  | 434.42                | Fluvoxamine maleate                                  | (E)-5-Methoxy-1-[4-(trifluoromethyl)phenyl]-1-pentanone-O-(2-aminoethyl)oxime maleate                | Serotonin          |        | Inhibitor  | Reuptake                 | Yes                 |                    | Inazu, M., et al, Neurochem. Int. 39, 39 (2001)                                                                                                                                                         |
| 07       | B07           | F 6145 | 5053--08-7  | 296.80                | Fenspiride hydrochloride                             | 8-(2-Phenylethyl)-1-oxa-3,8-diazaspiro[4.5]decan-2-one hydrochloride                                 | Adrenoceptor       |        | Antagonist | alpha                    |                     |                    | Feray, J.C., et al., Fenspiride and membrane transduction signals in rat alveolar macrophages Biochem. Pharmacol. 54, 293 (1997)                                                                        |
| 07       | B08           | F 6889 |             | 337.45                | Famotidine                                           | N'-(Aminosulfonyl)-3-[(2-(diaminomethyleneamino)-4-thiazolyl)methylthio]propanamide                  | Histamine          |        | Antagonist | H2                       |                     |                    | Mikawa, et al., The effects of cimetidine, ranitidine, and famotidine on human neutrophil functions. Anesth. Analg. 89, 218 (1999)                                                                      |
| 07       | B09           | F 9552 | 73573-87-2  | 804.90                | Formoterol                                           | (R*,R*)-N-[2-hydroxy-5-[1-hydroxy-2-[[2-(4-methoxyphenyl)-1-methylethyl]amino]ethyl]phenyl]formamide | Adrenoceptor       |        | Agonist    | beta2                    | Insoluble           |                    | Whelan, C.J. et al., Br. J. Pharmacol. 110, 613-618 (1993)                                                                                                                                              |
| 07       | B10           | G 0639 | 10238-21-8  | 494.01                | Glibenclamide                                        | Glyburide                                                                                            | K+ Channel         |        | Blocker    | ATP-dependent            | Insoluble           |                    | Chrabi, A. and Horisberger, J.D., J. Pharmacol. Exp. Ther. 290, 341 (1999)                                                                                                                              |

| Rack No. | Rack Position | CATNUM | CAS number  | Mol. Weight Structure | Name                                                              | Secondary Name                                                                                          | Class                 | Enzyme | Action     | Selectivity          | Solubility in Water | Solubility in DMSO | Reference                                                                                                                                                                                                          |
|----------|---------------|--------|-------------|-----------------------|-------------------------------------------------------------------|---------------------------------------------------------------------------------------------------------|-----------------------|--------|------------|----------------------|---------------------|--------------------|--------------------------------------------------------------------------------------------------------------------------------------------------------------------------------------------------------------------|
| 07       | B11           | G 5668 |             | 495.58                | GW1929                                                            | N-(2-Benzoylphenyl)-O-[2-(methyl-2-pyridinylamino)ethyl]-L-tyrosine;<br>N-(2-Benzoyl phenyl)-L-tyrosine | Transcription         |        | Agonist    | PPAR-gamma           |                     |                    | Brown, K.K., et al, A novel N-aryl tyrosine activator of peroxisome proliferator-activated receptor-gamma reverses the diabetic phenotype of the Zucker diabetic fatty rat Diabetes 90, 1415-1424 (1999)           |
| 07       | C02           | E 3250 |             | 428.55                | (-)-Ephedrine hemisulfate                                         |                                                                                                         | Adrenoceptor          |        | Activator  |                      |                     |                    | Persky, A.M. et al., Br J Clin Pharmacol. 2004;57:552-562                                                                                                                                                          |
| 07       | C03           | E 4375 | 51-42-3     | 333.30                | (-)-Epinephrine bitartrate                                        | Adrenaline bitartrate                                                                                   | Adrenoceptor          |        | Agonist    |                      | Yes                 |                    | Levitzki, A., Science. 1988 Aug 12;241(4867):800-6                                                                                                                                                                 |
| 07       | C04           | E 8875 | 50-28-2     | 272.39                | beta-Estradiol                                                    | Dihydrofolliculin                                                                                       | Hormone               |        |            | Estrogen             |                     |                    | Beato, M., Gene regulation by steroid hormones. Cell 56, 335-344 (1989)                                                                                                                                            |
| 07       | C05           | E-114  | 51350-19-7  | 313.83                | erythro-9-(2-Hydroxy-3-nonyl)adenine hydrochloride                | EHNA hydrochloride                                                                                      | Adenosine             | Enzyme | Inhibitor  | Adenosine deaminase  | Yes                 | 2.0 mg/ml          | Schaeffer, et al., Enzyme inhibitors. 26. Bridging hydrophobic and hydrophilic regions on adenosine deaminase with some 9-(2-hydroxy-3-alkyl) adenines. J. Med. Chem. 17, 6 (1974)                                 |
| 07       | C06           | F 2927 |             | 327.36                | 1-(4-Fluorobenzyl)-5-methoxy-2-methylindole-3-acetic acid         |                                                                                                         | Multi-Drug Resistance |        | Inhibitor  | MRP1                 | Yes                 | min. 18 mg/ml      | Maguire, A.R., Synthesis of indomethacin analogues for evaluation as modulators of MRP activity. Bioorg. Med. Chem. 9, 745 (2001)                                                                                  |
| 07       | C07           | F 6300 | 78755-81-4  | 303.30                | Flumazenil                                                        | Ro 15-1788                                                                                              | Benzodiazepine        |        | Antagonist |                      |                     |                    | Bertz, R.J., et al., Effect of neuroactive steroids on [3H]flumazenil binding to the GABA <sub>A</sub> receptor complex in vitro. Neuropharmacology 34, 1169-1175 (1995)                                           |
| 07       | C08           | F 7927 | 156547-56-7 | 506.56                | FSCPX                                                             | 8-Cyclopentyl-N3-[3-(4-(fluorosulfonyl)benzoyloxy)propyl]-N1-propylxanthine                             | Adenosine             |        | Antagonist | A1                   | Insoluble           |                    | van Muijlwijk-Koezen, Bioorg. Med. Chem. Lett. 11, 815 (2001)                                                                                                                                                      |
| 07       | C09           | F 9677 | 72509-76-3  | 384.26                | Felodipine                                                        | Plendil                                                                                                 | Ca2+ Channel          |        | Blocker    | L-type               | Insoluble           |                    | Angus, J., et al., Quantitative analysis of vascular to cardiac selectivity of L- and T-type voltage-operated calcium channel antagonists in human tissues. Clin. Exp. Obstet. Gynecol. 27, 1019 (2000)            |
| 07       | C10           | G 0668 |             | 395.47                | GW2974                                                            | N4-(1-Benzyl-1H-indazol-5-yl)-N6,N6-dimethyl-pyrido[3,4-d]pyrimidine-4,6-diamine                        | Phosphorylation       | Enzyme | Inhibitor  | EGFR / ErbB-2        |                     |                    | Rusnack, D. W., et al., The characterization of novel, dual ErbB-2/EGFR, tyrosine kinase inhibitors: potential therapy for cancer. CRC Handbook of Microbiology 61, 7196 (2001)                                    |
| 07       | C11           | G 6416 |             | 520.95                | GW5074                                                            | 3-(3, 5-Dibromo-4-hydroxybenzylidene-5-iodo-1,3-dihydro-indol-2-one)                                    | Phosphorylation       | Enzyme | Inhibitor  | Raf1 kinase          |                     |                    | Lackey, K., et al. The discovery of potent cRaf1 kinase inhibitors. Bioorg. Med. Chem. Lett. 10, 223 (2000)                                                                                                        |
| 07       | D02           | E 3256 | 116-38-1    | 201.70                | Edrophonium chloride                                              | Ethyl(m-hydroxyphenyl)dimethylammonium chloride                                                         | Cholinergic           | Enzyme | Inhibitor  | Acetylcholinesterase |                     |                    | Deschamps, A., et al., J Pharmacol Exp Ther. 2002 Jan;300(1):112-7                                                                                                                                                 |
| 07       | D03           | E 4378 | 67-42-5     | 380.35                | Ethylene glycol-bis(2-aminoethylether)-N,N,N',N'-tetraacetic acid | EGTA; Egtazic acid                                                                                      | Biochemistry          | Enzyme | Inhibitor  | Carboxypeptidase B   | Yes                 |                    | Schmid, R.W., Reilly, C.N., Anal. Chem. 29, 264 (1957)                                                                                                                                                             |
| 07       | D04           | E 9750 | 53-16-7     | 270.37                | Estrone                                                           | Folliculin                                                                                              | Hormone               |        |            | Estrogen             |                     |                    | Abplanalp, W., Evidence for interference in estradiol-17beta-oxidation to estrone by oxidized low-density lipoprotein and selected lipid peroxidation products. J. Lab. Clin. Med. 134, 253 (1999)                 |
| 07       | D05           | E-140  |             | 609.73                | Ergocristine                                                      | 12'-Hydroxy-2'-(1-methyl-ethyl)-5'-(phenylmethyl)ergotaman-3'6'18-trione                                | Dopamine              |        | Agonist    |                      | Insoluble           |                    | Choudhary, M.S., Differential ergoline and ergopeptine binding to 5-hydroxytryptamine2A receptors: ergolines require an aromatic residue at position 340 for high affinity binding. Mol. Pharmacol. 47, 450 (1995) |
| 07       | D06           | F 3764 | 85666-17-7  | 275.24                | Furegrelate sodium                                                | 5-(3-Pyridinylmethyl)benzofurancarboxylic acid sodium                                                   | Phosphorylation       | Enzyme | Inhibitor  | Thromboxane synthase |                     |                    | Gorman, R.R., et al., Prostaglandins 26, 325 (1983)                                                                                                                                                                |
| 07       | D07           | F 6426 |             | 307.35                | Foliosidine                                                       |                                                                                                         | Anticonvulsant        |        |            |                      |                     |                    | Pastukhova, et al., Chem. Nat. Cpd. 1, 27 (1965)                                                                                                                                                                   |
| 07       | D08           | F 8175 |             | 358.55                | Farnesylthiosalicylic acid                                        | FTS                                                                                                     | G protein             | Enzyme | Antagonist | Ras                  |                     |                    | Karussis, D. et al., J Neuroimmunol. 2001;120:1-9.                                                                                                                                                                 |
| 07       | D09           | F-100  | 1841-19-6   | 475.59                | Fluspirilene                                                      | R 6218                                                                                                  | Dopamine              |        | Antagonist | D2/D1                | Insoluble           |                    | Galizzi, J.P., Neuroleptics of the diphenylbutylpiperidine series are potent calcium channel inhibitors Proc. Natl. Acad. Sci. USA 83, 7513 (1986)                                                                 |

| Rack No. | Rack Position | CATNUM | CAS number | Mol. Weight Structure | Name                                  | Secondary Name                                                                                                                                                                               | Class           | Enzyme | Action     | Selectivity               | Solubility in Water | Solubility in DMSO | Reference                                                                                                                                                                                            |
|----------|---------------|--------|------------|-----------------------|---------------------------------------|----------------------------------------------------------------------------------------------------------------------------------------------------------------------------------------------|-----------------|--------|------------|---------------------------|---------------------|--------------------|------------------------------------------------------------------------------------------------------------------------------------------------------------------------------------------------------|
| 07       | D10           | G 1043 | 29520-14-7 | 282.56                | Guanfacine hydrochloride              | N-(aminoiminomethyl)-2,6-dichloro-benzeneacetamide hydrochloride                                                                                                                             | Adrenoceptor    |        | Agonist    | alpha2                    | Yes                 | 12 mg/ml @ 60°C    | Taylor, F.B and Russo, J. Comparing guanfacine and dextroamphetamine for the treatment of adult attention deficit/hyperactivity disorder J. Clin. Psychopharmacol. 21, 223-228 (2001)                |
| 07       | D11           | G 6649 | 446-72-0   | 270.24                | Genistein                             | 5,7-Dihydroxy-3-(4-hydroxyphenyl)-4H-1-benzopyran-4-one                                                                                                                                      | Phosphorylation | Enzyme | Inhibitor  | Tyrosine kinase           |                     |                    | Akiyama, T., et al., Genistein, a specific inhibitor of tyrosine-specific protein kinases J. Biol. Chem. 262, 5592-5595 (1987)                                                                       |
| 07       | E02           | E 3263 | 89197-00-2 | 252.75                | Efaroxan hydrochloride                | RX 821037A                                                                                                                                                                                   | Imidazoline     |        | Antagonist | I1                        | Yes                 | 300 mg/ml          | Berridge, T.L., et al., Selectivity profile of the alpha 2-adrenoceptor antagonist efaroxan in relation to plasma glucose and insulin levels in the rat Eur. J. Pharmacol. 213, 205-212 (1992)       |
| 07       | E03           | E 4642 | 329-63-5   | 219.67                | (±)-Epinephrine hydrochloride         | (±)-Adrenalin hydrochloride                                                                                                                                                                  | Adrenoceptor    |        | Agonist    |                           |                     |                    | Van Bockstaele E.J., Brain Res Bull. 1998 Sep 1;47(1):1-15                                                                                                                                           |
| 07       | E04           | E-002  | 69954-48-9 | 226.24                | Methyl beta-carboline-3-carboxylate   | beta-CCM                                                                                                                                                                                     | Benzodiazepine  |        | Agonist    |                           |                     |                    | Cain, et al., b-Carbolines: Synthesis and neurochemical and pharmacological actions on brain benzodiazepine receptors. J. Med. Chem. 25, 1081 (1982)                                                 |
| 07       | E05           | F 0778 | 25451-15-4 | 238.25                | Felbamate                             | 2-Phenyl-1,3-propanediol dicarbamate                                                                                                                                                         | Glutamate       |        | Antagonist |                           |                     |                    | Domenci, M.R., et al., Effects of felbamate, kynurenic acid derivatives and NMDA antagonists on in vitro kainate-induced epileptiform activity. Life Sci. 58, 391-396 (1996)                         |
| 07       | E06           | F 4303 |            | 592.12                | Fiduxosin hydrochloride               | (3-[4-((3alphaR,9betaR)-cis-9-methoxy-1,2,3,3a,4,9b-hexahydro-1H-benzopyrano[3,4-c]pyrrol-2-yl)butyl]-8-phenylpyrazino[2,3':3',4,5]thi-eno [3,2-d]pyrimidine-2,4(1H,3H)-dione) hydrochloride | Adrenoceptor    |        | Antagonist | alpha1                    | Insoluble           |                    | Hancock, A. et al., J. Pharmacol. Exp. Ther. 300, 478-486 (2002)                                                                                                                                     |
| 07       | E07           | F 6513 | 536-69-6   | 179.22                | Fusaric acid                          | 5-Butyl-2-pyridinecarboxylic acid                                                                                                                                                            | Dopamine        | Enzyme | Inhibitor  | Dopamine beta-hydroxylase |                     |                    | Bencsics, A., et al., Dopamine, as well as norepinephrine, is a link between noradrenergic nerve terminals and splenocytes Brain Res. 761, 236-243 (1997)                                            |
| 07       | E08           | F 8257 | 30484-77-6 | 477.43                | Flunarizine dihydrochloride           | 1-bis(4-fluorophenyl)methyl]-4-(3-phenyl-2-propenyl)-piperazine dihydrochloride                                                                                                              | Ion Pump        |        | Blocker    | Na+/Ca2+ channel          |                     |                    | Ayajiki, K., Eur. J. Pharmacol. 329, 49 (1997)                                                                                                                                                       |
| 07       | E09           | F-114  | 2709-56-0  | 507.45                | cis-(Z)-Flupenthixol dihydrochloride  | (Z)-4-[3-[2-(Trifluoromethyl)-9H-thioxanthen-9-ylidene]propyl]-1-piperazine-ethanol dihydrochloride                                                                                          | Dopamine        |        | Antagonist |                           | Yes                 |                    | Nielsen, et al., Prolonged neuroleptic effect of a-flupenthixol decanoate in oil. Acta Pharmacol. Toxicol. 32, 363-376 (1973)                                                                        |
| 07       | E10           | G 2128 | 138-15-8   | 183.59                | L-Glutamic acid hydrochloride         | S(+)-1-Aminopropane-1,3-dicarboxylic acid hydrochloride                                                                                                                                      | Glutamate       |        | Agonist    |                           |                     |                    | Pin, J.-P., Dulvoisin, R., Neuropharmacology 34, 1 (1995)                                                                                                                                            |
| 07       | E11           | G 6793 |            | 502.77                | GW7647                                | 2-(4-(2-(1-Cyclohexanebutyl)-3-cyclohexylureido)ethyl)phenylthio)-2-methylpropionic acid                                                                                                     | Transcription   |        | Agonist    | PPAR-alpha                | Insoluble           |                    | Brown, P.J., et al, Identification of a subtype selective human PPARalpha agonist through parallel-array synthesis. Bioorg. Med. Chem. Lett. 11, 1225-1227 (2001)                                    |
| 07       | F02           | E 3380 | 519-23-3   | 246.31                | Ellipticine                           | 5,11-Dimethyl-6H-pyrido[4,3-b]carbazole                                                                                                                                                      | Cell Cycle      | Enzyme | Inhibitor  | CYP1A1 / Topoll           |                     |                    | Sailer, B.L., et al., Monitoring uptake of ellipticine and its fluorescence lifetime in relation to the cell cycle phase by flow cytometry. Exp. Cell Res. 236, 259-267 (1997)                       |
| 07       | F03           | E 7138 | 77-67-8    | 141.17                | Ethosuximide                          | 2-Ethyl-2-methylsuccinimide                                                                                                                                                                  | Anticonvulsant  |        |            |                           |                     |                    | Leresche, N., et al., J. Neurosci. 18, 4842 (1998)                                                                                                                                                   |
| 07       | F04           | E-006  | 78538-74-6 | 225.25                | N-Methyl-beta-carboline-3-carboxamide | FG-7142                                                                                                                                                                                      | GABA            |        | Antagonist | GABA-A                    | Insoluble           |                    | Dorow, et al., Severe anxiety induced by FG-7142, a carboline ligand for benzodiazepine receptors. Lancet 2, 98-99 (1983)                                                                            |
| 07       | F05           | F 0881 | 751-94-0   | 538.71                | Fusidic acid sodium                   | Fusidin                                                                                                                                                                                      | Cell Cycle      |        | Inhibitor  |                           | Yes                 |                    | Di Marco, R., et al., Amelioration of experimental allergic neuritis by sodium fusidate (fusidin): suppression of IFN-gamma and TNF-alpha and enhancement of IL-10. J. Autoimmun. 13, 187-195 (1999) |
| 07       | F06           | F 4381 | 54-31-9    | 330.75                | Furosemide                            |                                                                                                                                                                                              | Ion Pump        |        | Inhibitor  | Na+,K+,Cl- cotransport    | Yes                 |                    | Zangen, A., et al., Eur. J. Pharmacol. 361, 151 (1998)                                                                                                                                               |

| Rack No. | Rack Position | CATNUM | CAS number  | Mol. Weight Structure | Name                                                      | Secondary Name                                                                             | Class             | Enzyme | Action     | Selectivity                               | Solubility in Water | Solubility in DMSO | Reference                                                                                                                                                                                                                                         |
|----------|---------------|--------|-------------|-----------------------|-----------------------------------------------------------|--------------------------------------------------------------------------------------------|-------------------|--------|------------|-------------------------------------------|---------------------|--------------------|---------------------------------------------------------------------------------------------------------------------------------------------------------------------------------------------------------------------------------------------------|
| 07       | F07           | F 6627 | 51-21-8     | 130.08                | 5-Fluorouracil                                            | 5-FU                                                                                       | Cell Cycle        | Enzyme | Inhibitor  | Thymidylate synthetase                    |                     |                    | Elstein, K.H., et al., Nucleoside-mediated mitigation of 5-fluorouracil-induced toxicity in synchronized murine erythroleukemic cells Toxicol. Appl. Pharmacol. 146, 29-39 (1997)                                                                 |
| 07       | F08           | F 8791 | 3094--09--5 | 246.20                | 5-fluoro-5'-deoxyuridine                                  | 5'dFUrd                                                                                    | DNA Metabolism    |        | Inhibitor  |                                           |                     |                    | Tanaka, Y., et al., Cancer Res. 50, 4528 (1990)                                                                                                                                                                                                   |
| 07       | F09           | F-124  | 80288-49-9  | 260.25                | Furafylline                                               | 3-(2-Furanylmethyl)-3,7-dihydro-1,8-dimethyl-1H-purine-2,6-dione                           | Biochemistry      | Enzyme | Inhibitor  | P450IA2                                   | Insoluble           |                    | Segura, et al., Some pharmacokinetic characteristics of furafylline, a new 1,3,8-trisubstituted xanthine. J. Pharm. Pharmacol. 38, 615-618 (1986)                                                                                                 |
| 07       | F10           | G 2536 | 82410-32-0  | 255.24                | Ganciclovir                                               |                                                                                            | Cell Cycle        |        | Inhibitor  | G2-M checkpoint                           |                     |                    | Halloran, P.J., and Fenton, R.G., Irreversible G2-M arrest and cytoskeletal reorganization induced by cytotoxic nucleoside analogues Cancer Res. 58, 3855-3865 (1998)                                                                             |
| 07       | F11           | G 7788 | 73477-53-9  | 189.17                | alpha-Guanidinoglutaric acid                              | GGA                                                                                        | Nitric Oxide      | Enzyme | Inhibitor  | NOS                                       |                     |                    | Mori, A., et al., J. Neurochem. 35, 603 (1980)                                                                                                                                                                                                    |
| 07       | G02           | E 3520 | 60940-34-3  | 274.18                | Ebselen                                                   | 2-Phenyl-1,2-benzisoxelenazol-3(2H)-one                                                    | Leukotriene       | Enzyme | Inhibitor  | Lipoxygenases / glutathione S-transferase |                     |                    | Noguchi, N., et al., Biochim. Biophys. Acta 1213, 176 (1994)                                                                                                                                                                                      |
| 07       | G03           | E 7649 | 145-73-3    | 186.17                | Endothall                                                 | 7-Oxabicyclo[2.2.1]heptane-2,3-dicarboxylic acid                                           | Phosphorylation   | Enzyme | Inhibitor  | PP2A                                      |                     |                    | Li, Y.M. and Casida, J.E., Proc. Natl. Acad. Sci. USA 89, 11867 (1992)                                                                                                                                                                            |
| 07       | G04           | E-007  | 82499-00-1  | 314.34                | Methyl 6,7-dimethoxy-4-ethyl-beta-carboline-3-carboxylate | DMCM                                                                                       | Benzodiazepine    |        | Agonist    |                                           | Insoluble           |                    | Braestrup, et al., Interaction of convulsive ligands with benzodiazepine receptors. Science 216, 1241 (1982)                                                                                                                                      |
| 07       | G05           | F 1016 | 1944-12--3  | 384.27                | Fenoterol hydrobromide                                    | 2-(3,5-Dihydroxyphenyl)-2-hydroxy-2'-(4-hydroxyphenyl)-1'-methyl-diethylamine hydrobromide | Adrenoceptor      |        | Agonist    | beta2                                     |                     |                    | Preuss, J.M., et al., The influence of animal age on beta-adrenoceptor density and function in tracheal airway smooth muscle. Naunyn-Schmiedeberg's Arch. Pharmacol. 360, 171-178 (1999)                                                          |
| 07       | G06           | F 4646 | 1132-68-9   | 183.18                | p-Fluoro-L-phenylalanine                                  | 4-Fluoro-L-phenylalanine                                                                   | Neurotransmission | Enzyme | Substrate  | Tyrosine Hydroxylase                      |                     |                    | Sunkara, P.S., et al., Chromosome condensing ability of mitotic proteins diminished by the substitution of phenylalanine with parafluorophenylalanine Eur. J. Cell Biol. 23, 312-316 (1981)                                                       |
| 07       | G07           | F 6777 | 54143-56-5  | 474.40                | Flecainide acetate                                        | N-(2-Piperidylmethyl)-2,5-bis-(2,2,2-trifluoroethoxy)benzamide acetate                     | Na+ Channel       |        | Blocker    |                                           |                     |                    | Somani, P., Clin. Pharmacol. Ther. 27, 464 (1980)                                                                                                                                                                                                 |
| 07       | G08           | F 8927 |             | 420.40                | Flupirtine maleate                                        | 2-amino-6-[[4-(4-fluorophenyl)methylamino]-3-pyridinyl]-carbamic acid, ethyl ester maleate | Glutamate         |        | Antagonist | NMDA                                      | Insoluble           |                    | Muller, et al., Mech. Ageing Dev. 116, 163-218 (2000)                                                                                                                                                                                             |
| 07       | G09           | F-131  | 120934-96-5 | 347.42                | FPL 64176                                                 | 2,5-Dimethyl-4-[2-(phenylmethyl)benzoyl]-1H-pyrrole-3-carboxylic acid methyl ester         | Ca2+ Channel      |        | Activator  | L-type                                    |                     |                    | Rampe, et al., A new site for the activation of cardiac calcium channels defined by the nondihydropyridine FPL 64176 J. Pharmacol. Exp. Ther. 259, 982-987 (1991)                                                                                 |
| 07       | G10           | G 3126 | 56-85-9     | 146.15                | L-Glutamine                                               | S(+)-Glutamic acid 5-amide                                                                 | Glutamate         |        | Agonist    |                                           |                     |                    | McMahon, H.T., Nicholls, D.G., J. Neurochem. 54, 373 (1990)                                                                                                                                                                                       |
| 07       | G11           | G 8134 | 65-29-2     | 891.54                | Gallamine triethiodide                                    |                                                                                            | Cholinergic       |        | Antagonist | M2                                        | Yes                 | 100 mg/ml          | Leppik, R.A., et al., Role of acidic amino acids in the allosteric modulation by gallamine of antagonist binding at the m2 muscarinic acetylcholine receptor. Mol. Pharmacol. 45, 983-990 (1994)                                                  |
| 07       | H02           | E 3645 | 112989-01-2 | 522.71                | rac-2-Ethoxy-3-hexadecanamido-1-propylphosphocholine      |                                                                                            | Phosphorylation   | Enzyme | Inhibitor  | PKC                                       |                     |                    | Marx, M.H., et al., J. Med. Chem. 31, 858 (1988)                                                                                                                                                                                                  |
| 07       | H03           | E 7881 | 518-82-1    | 270.24                | Emodin                                                    |                                                                                            | Phosphorylation   | Enzyme | Inhibitor  | p56lck TK                                 |                     |                    | Kumar, et al., Emodin (3-methyl-1,6,8-trihydroxyanthraquinone) inhibits TNF-induced NF-kappaB activation, I kappaB degradation, and expression of cell surface adhesion proteins in human vascular endothelial cells. Oncogene 17, 913-918 (1998) |
| 07       | H04           | E-100  | 104015-29-4 | 334.38                | (-)-Eseroline fumarate                                    |                                                                                            | Cholinergic       | Enzyme | Inhibitor  | Cholinesterase                            | Yes                 |                    | Furst, S. et al., Direct evidence that eseroline possesses morphine-like effects Eur. J. Pharmacol. 83, 232 (1982)                                                                                                                                |

| Rack No. | Rack Position | CATNUM | CAS number | Mol. Weight Structure | Name                                      | Secondary Name                                                                                 | Class        | Enzyme | Action     | Selectivity    | Solubility in Water | Solubility in DMSO | Reference                                                                                                                                                                                                |
|----------|---------------|--------|------------|-----------------------|-------------------------------------------|------------------------------------------------------------------------------------------------|--------------|--------|------------|----------------|---------------------|--------------------|----------------------------------------------------------------------------------------------------------------------------------------------------------------------------------------------------------|
| 07       | H05           | F 1553 |            | 345.80                | S-(+)-Fluoxetine hydrochloride            |                                                                                                | Serotonin    |        | Inhibitor  | Reuptake       | Yes                 | 18 mg/ml           | Wong, D.T. et al., Neuropsychopharmacology 5, 43-47 (1991)                                                                                                                                               |
| 07       | H06           | F 4765 | 146-56-5   | 510.45                | Fluphenazine dihydrochloride              |                                                                                                | Dopamine     |        | Antagonist | D1/D2          |                     |                    | Cai, G., Inverse agonist properties of dopaminergic antagonists at the D (1A) dopamine receptor: uncoupling of the D (1A) dopamine receptor from G (s) protein Mol. Pharmacol. 56, 989 (1999)            |
| 07       | H07           | F 6800 |            | 386.68                | Fenoldopam bromide                        | SKF-82526                                                                                      | Dopamine     |        | Agonist    | D1             | Yes                 | 4.75 mg/ml         | Hahn, R.A., et al., Characterization of the peripheral and central effects of SKF 82526a novel dopamine receptor agonist J. Pharmacol. Exp. Ther. 223, 305-313 (1982)                                    |
| 07       | H08           | F 9397 | 13311-84-7 | 276.22                | Flutamide                                 | 2-Methyl-N-(4-nitro-3-(trifluoromethyl)phenyl)propanamide                                      | Hormone      |        | Inhibitor  | Androgen       |                     |                    | Zaccheo, T., et al., Endocrinol. Relat. Cancer 6, 429 (1999)                                                                                                                                             |
| 07       | H09           | F-132  | 59333-67-4 | 345.80                | Fluoxetine hydrochloride                  | Prozac; LY-110,140 hydrochloride                                                               | Serotonin    |        | Inhibitor  | Reuptake       | Yes                 | 4 mg/ml            | Wong, D.T., et al., Prozac (fluoxetine, Lilly 110140), the first selective serotonin uptake inhibitor and an antidepressant drug: twenty years since its first publication. Life Sci. 57, 411-441 (1995) |
| 07       | H10           | G 3416 |            | 699.61                | Guanidinylnaltrindole di-trifluoroacetate | GNTI di-trifluoroacetate                                                                       | Opioid       |        | Antagonist | kappa          | Yes                 | 30 mg/ml           | Jones, R.M. and Portoghesi, P.S., Eur. J. Pharmacol. 396, 49-52 (2000)                                                                                                                                   |
| 07       | H11           | G 9659 | 67469-81-2 | 487.52                | GBR-12935 dihydrochloride                 | 1-[2-(Diphenylmethoxy)ethyl]-4-(3-phenylpropyl)-piperazine dihydrochloride                     | Dopamine     |        | Inhibitor  | Reuptake       | Yes                 | 20 mg/ml           | Gordon, I., et al., [3H]GBR 12935 binding to human platelet membranes is sensitive to piperazine derivatives but not to dopamine uptake inhibitors. Life Sci. 55, 189-199 (1994)                         |
| 08       | A02           | G-002  | 68547-97-7 | 163.61                | Isoguvacine hydrochloride                 | 1,2,3,6-Tetrahydro-4-pyridinecarboxylic acid hydrochloride                                     | GABA         |        | Agonist    | GABA-A, GABA-C | Yes                 |                    | Krosgaard-Larsen, et al., Structure-activity studies on the inhibition of GABA binding to rat brain membranes by muscimol and related compounds. J. Neurochem. 30, 1377 (1978)                           |
| 08       | A03           | G-120  |            | 295.34                | GYKI 52895                                | 1-(4-Aminophenyl)-4-methyl-7,8-methylenedioxy-3,4-dihydro-5H-2,3-benzodiazepine hydrochloride  | Dopamine     |        | Inhibitor  | Reuptake       |                     |                    | Horvath, K., et al., Pharmacological effects of GYKI 52895a new selective dopamine uptake inhibitor Eur. J. Pharmacol. 183, 1416 (1990)                                                                  |
| 08       | A04           | H 1377 | 67423-45-4 | 454.52                | MHPG piperazine                           | MOPEG piperazine                                                                               | Adrenoceptor |        | Metabolite |                |                     |                    | Wada, Y., et al., Variation of monoamines and their metabolite contents in the cerebrospinal fluid of conscious rats Jpn. J. Pharmacol. 78, 237-240 (1998)                                               |
| 08       | A05           | H 2775 | 4294-45-5  | 149.10                | DL-threo-beta-hydroxyaspartic acid        | threo-2-Amino-3-hydroxysuccinic acid                                                           | Glutamate    |        | Inhibitor  | Transport      |                     |                    | Hirata, A., et al., AMPA receptor-mediated slow neuronal death in the rat spinal cord induced by long-term blockade of glutamate transporters with THA Brain Res. 771, 37-44 (1997)                      |
| 08       | A06           | H 5752 | 68-96-2    | 330.47                | 17alpha-hydroxyprogesterone               | 17alpha-Hydroxy-4-pregnene-3,20-dione                                                          | Hormone      |        | Metabolite | Progesterone   |                     |                    | Linder, N., et al., Arch. Dis. Child Fetal Neonatal Ed. 81, 175 (1999)                                                                                                                                   |
| 08       | A07           | H 8125 | 5934-29-2  | 191.62                | L-Histidine hydrochloride                 | S(+)-alpha-Amino-1H-imidazole-4-propanoic acid hydrochloride                                   | Histamine    |        | Precursor  |                |                     |                    | Fitzsimons, C.P., Histamine deficiency induces tissue-specific down-regulation of histamine H2 receptor expression in histidine decarboxylase knockout mice. FEBS Lett. 508, 245 (2001)                  |
| 08       | A08           | H 9002 | 101-31-5   | 289.38                | L-Hyoscyamine                             | [3(S)-endo]-alpha-(Hydroxymethyl)benzeneacetic acid 8-methyl-8-azabicyclo[3.2.1]oct-3-yl ester | Cholinergic  |        | Antagonist |                |                     |                    | Palmer, L., et al., A method using L-hyoscyamine for the study of muscarinic acetylcholine receptor binding in vivo Pharmacol. Toxicol. 60, 54-57 (1987)                                                 |
| 08       | A09           | H 9882 | 5351-23-5  | 152.15                | 4-Hydroxybenzhydrazide                    | 4-Hydroxybenzoylhydrazine                                                                      | Biochemistry | Enzyme | Inhibitor  |                |                     |                    |                                                                                                                                                                                                          |
| 08       | A10           | H-168  | 82730-72-1 | 328.30                | R-(+)-7-Hydroxy-DPAT hydrobromide         | R-(+)-7-Hydroxy-dipropylaminotetralin hydrobromide                                             | Dopamine     |        | Agonist    | D3             | Yes                 | >100 mg/ml         | Baldessarini, R., Isomeric selectivity at dopamine D receptors Eur. J. Pharmacol. 239, 269 (1993)                                                                                                        |
| 08       | A11           | I 1149 | 144-48-9   | 184.96                | Iodoacetamide                             |                                                                                                | Biochemistry | Enzyme | Inhibitor  |                | Yes                 | 0.5 @ 20°C         | Wu, Y., et al., FEBS Lett. 1998 Nov 27;440(1-2):111-5                                                                                                                                                    |
| 08       | B02           | G-007  | 498-96-4   | 163.61                | Guvacine hydrochloride                    |                                                                                                | GABA         |        | Inhibitor  | Uptake         | Yes                 |                    | Johnston, et al., Betel nut constituents as inhibitors of gamma-aminobutyric acid uptake. Nature 258, 6228 (1975)                                                                                        |

| Rack No. | Rack Position | CATNUM | CAS number  | Mol. Weight Structure | Name                                             | Secondary Name                                                                                            | Class           | Enzyme | Action     | Selectivity                  | Solubility in Water | Solubility in DMSO | Reference                                                                                                                                                                                                       |
|----------|---------------|--------|-------------|-----------------------|--------------------------------------------------|-----------------------------------------------------------------------------------------------------------|-----------------|--------|------------|------------------------------|---------------------|--------------------|-----------------------------------------------------------------------------------------------------------------------------------------------------------------------------------------------------------------|
| 08       | B03           | G-133  | 126766-32-3 | 530.41                | GR-89696 fumarate                                | 4-[(3,4-Dichlorophenyl)acetyl]-3-(1-pyrrolidinylmethyl)-1-piperazinecarboxylic acid methyl ester fumarate | Opioid          |        | Agonist    | kappa                        | Yes                 | 8.5 mg/ml          | Birch, et al., Neuroprotective actions of GR 89696 a highly potent and selective $\kappa$ -opioid receptor agonist Br. J. Pharmacol. 103, 1819-1823 (1991)                                                      |
| 08       | B04           | H 1384 | 300-84-5    | 109.15                | Hypotaurine                                      | 2-Aminoethanesulfonic acid                                                                                | Cell Stress     |        | Inhibitor  | Antioxidant                  | Yes                 | 100 mg/ml          | Okamoto, K., and Sakai, Y., Inhibitory actions of taurocyamine, hypotaurine, homotaurine, taurine and GABA on spike discharges of Purkinje cells Brain Res. 206, 371-386 (1981)                                 |
| 08       | B05           | H 3132 | 645-33-0    | 203.67                | 4-Methoxy-3-hydroxyphenethylamine hydrochloride  | 4-O-Methyl dopamine hydrochloride                                                                         | Dopamine        |        | Metabolite |                              |                     |                    | Shen, R.S., Inhibition of dihydropteridine reductase by catecholamines and related compounds. Biochim. Biophys. Acta 743, 129 (1983)                                                                            |
| 08       | B06           | H 6036 |             | 386.45                | 1,3,5-tris(4-hydroxyphenyl)-4-propyl-1H-pyrazole | PPT                                                                                                       | Hormone         |        | Agonist    | ER-alpha                     | Insoluble           |                    | Stauffer, et al., J. Med. Chem. 43, 4934 (2000)                                                                                                                                                                 |
| 08       | B07           | H 8250 | 9024-61-7   | 328.30                | (±)-8-Hydroxy-DPAT hydrobromide                  | (±)-8-Hydroxy-dipropylaminotetralin hydrobromide                                                          | Serotonin       |        | Agonist    | 5-HT1A                       |                     |                    | Nilsson, T., et al., Eur Pharmacol. 1999 May 7;372(1):49-56                                                                                                                                                     |
| 08       | B08           | H 9003 | 123-31-9    | 110.11                | Hydroquinone                                     | 1,4-Benzenediol                                                                                           | Leukotriene     | Enzyme | Inhibitor  | Arachidonate 12-Lipoxygenase |                     |                    | McCue, J.M., et al., Mol Immunol. 2003 Jun;39(16):995-1001                                                                                                                                                      |
| 08       | B09           | H-108  | 312-45-8    | 574.36                | Hemicholinium-3                                  |                                                                                                           | Cholinergic     |        | Blocker    | Uptake                       | Yes                 | 0.10 mg/ml         | Bove, et al., Pharmacological activities of acetal derivatives of hemicholinium No. 3 Eur. J. Pharmacol. 57, 149-163 (1979)                                                                                     |
| 08       | B10           | G 6043 |             | 524.59                | GR 125487 sulfamate salt                         | [1-[2-((Methylsulfonyl)amino)ethyl]-4-piperidinyl]methyl-5-fluoro-2-methoxy-1H-indole-3-carboxylate       | Serotonin       |        | Antagonist | 5-HT4                        | Yes                 | 14 mg/ml @ 60C     | Pindon, A., et al., Mol. Pharmacol., 61, 85-96 (2002), Mol. Pharmacol. 61, 85-96 (2002)                                                                                                                         |
| 08       | B11           | I 1392 | 84468-24-6  | 313.81                | HA-100                                           | 1-(5-Isoquinolinesulfonyl)piperazine hydrochloride                                                        | Phosphorylation | Enzyme | Inhibitor  | PKA / PKC / MLCK             |                     |                    | Hagiwara M., et al., Mol Pharmacol. 1987 Jul;32(1):7-12                                                                                                                                                         |
| 08       | C02           | G-017  | 77521-29-0  | 267.08                | (±)-AMPA hydrobromide                            | (±)-alpha-Amino-3-hydroxy-5-methylisoxazole-4-propionic acid hydrobromide                                 | Glutamate       |        | Agonist    | AMPA/kainate                 | Yes                 | 1.2 mg/ml          | Krogsgaard-Larsen, New class of glutamate agonist structurally related to ibotenic acid. Nature 284, 64 (1980)                                                                                                  |
| 08       | C03           | G-154  | 60142-96-3  | 171.24                | Gabapentin                                       | 1-(Aminomethyl)-cyclohexaneacetic acid                                                                    | Anticonvulsant  |        |            |                              | Yes                 | 10 mg/ml           | Gee, N., et al., The novel anticonvulsant drug gabapentin (neurontin) binds to the $\alpha_2$ subunit of a calcium channel J. Biol. Chem. 271, 5768 (1996)                                                      |
| 08       | C04           | H 1512 | 52-86-8     | 375.87                | Haloperidol                                      |                                                                                                           | Dopamine        |        | Antagonist | D2/D1                        | Insoluble           |                    | Nakahara, T., Effects of atypical antipsychotic drugs vs. haloperidol on expression of heat shock protein in the discrete brain regions of phencyclidine treated rats Brain Res. Mol. Brain Res. 73, 193 (1999) |
| 08       | C05           | H 3146 | 118909-22-1 | 330.34                | Hydroxytacrine maleate                           | HP-029                                                                                                    | Cholinergic     | Enzyme | Inhibitor  | Cholinesterase               |                     |                    | Shutske, G.M., et al., J. Med. Chem. 32, 1805 (1989)                                                                                                                                                            |
| 08       | C06           | H 6892 | 95333-64-5  | 206.27                | 1-(4-Hydroxybenzyl)imidazole-2-thiol             |                                                                                                           | Dopamine        | Enzyme | Inhibitor  | Dopamine beta-hydroxylase    |                     |                    | Kruse, L.I., et al., J. Med. Chem. 29, 2465 (1986)                                                                                                                                                              |
| 08       | C07           | H 8502 | 62-31-7     | 189.64                | Dopamine hydrochloride                           | 3-Hydroxytyramine hydrochloride                                                                           | Dopamine        |        | Agonist    |                              | Yes                 |                    | Jones, et al., Dopamine neuronal transport kinetics and effects of amphetamine J. Neurochem. 73, 2406-2414 (1999)                                                                                               |
| 08       | C08           | B 8433 |             | 243.29                | BU99006                                          | 2-(Imidazolin-2-yl)-5-isothiocyanatobenzofuran                                                            | Imidazoline     |        | Ligand     | I2                           |                     |                    | Tyacke, R.J., Neuropharmacology. 2002 Jul;43(1):75-83                                                                                                                                                           |
| 08       | C09           | H-120  | 92564-34-6  | 329.81                | HA-1004 hydrochloride                            | N-(2-Guanidinoethyl)-5-isoquinolinesulfonamide hydrochloride                                              | Phosphorylation | Enzyme | Inhibitor  | PK                           |                     |                    | Gidman, H.M., et al., Endocrinology. 1990 Jan;26(1):441-50                                                                                                                                                      |
| 08       | C10           | I 0154 | 121034-89-7 | 428.30                | IEM-1460                                         | 1-Trimethylammonio-5-(1-adamantanemethylammonio)pentane dibromide                                         | Glutamate       |        | Inhibitor  | AMPA                         |                     |                    | Samoilova, M.V., et al., Neuroscience 94, 261-268 (1999)                                                                                                                                                        |

| Rack No. | Rack Position | CATNUM | CAS number  | Mol. Weight Structure | Name                                                    | Secondary Name                                                 | Class              | Enzyme | Action     | Selectivity                 | Solubility in Water | Solubility in DMSO | Reference                                                                                                                                                                                                  |
|----------|---------------|--------|-------------|-----------------------|---------------------------------------------------------|----------------------------------------------------------------|--------------------|--------|------------|-----------------------------|---------------------|--------------------|------------------------------------------------------------------------------------------------------------------------------------------------------------------------------------------------------------|
| 08       | C11           | I 1637 | 22254-24-6  | 412.37                | Ipratropium bromide                                     | Atropine isopropyl bromide                                     | Cholinergic        |        | Antagonist | Muscarinic                  | Yes                 | 10 mg/ml           | Groeben, H., and Brown, R.H., Ipratropium decreases airway size in dogs by preferential M2muscarinic receptor blockade in vivo. <i>Anesthesiology</i> 85, 867-873 (1996)                                   |
| 08       | D02           | G-019  | 18174-72-6  | 195.02                | Muscimol hydrobromide                                   | 3-Hydroxy-5-aminomethylisoxazole hydrobromide                  | GABA               |        | Agonist    | GABA-A, GABA-C              | Yes                 | 19 mg/ml           | Curtis, D.R., et al., Bicuculline, an antagonist of GABA and synaptic inhibition in the spinal cord of the cat. <i>Brain Res.</i> 32, 69-96 (1971)                                                         |
| 08       | D03           | H 0126 | 51-56-9     | 356.26                | DL-Homatropine hydrobromide                             | Tropine mandelate hydrobromide                                 | Cholinergic        |        | Antagonist | Muscarinic                  | Yes                 | 50 mg/ml           | Sim, M.K., and Manjeet, S., Muscarinic receptors in the aortae of normo- and hypertensive rats: a binding study <i>Clin. Exp. Hypertens.</i> 15, 409-421 (1993)                                            |
| 08       | D04           | H 1753 | 304-20-1    | 196.64                | Hydralazine hydrochloride                               | 1-Hydrazinophthalazine hydrochloride                           | Neurotransmission  | Enzyme | Inhibitor  | MAO-A/B                     |                     |                    | Gronvall, J.L., An autoradiographic method of visualising semicarbazide-sensitive amine oxidase activity in mouse tissue sections. <i>Neurobiol. Dis.</i> 8, 167 (2000)                                    |
| 08       | D05           | H 4001 | 50-23-7     | 362.47                | Hydrocortisone                                          | Cortisol                                                       | Hormone            |        |            | Cortisol                    |                     |                    | Parrillo, J. E., Fauci, A.S., Mechanisms of glucocorticoid action on immune processes. <i>Ann. Rev. Pharmacol. Toxicol.</i> 19, 179 (1979)                                                                 |
| 08       | D06           | H 7250 | 56-92-8     | 184.07                | Histamine dihydrochloride                               | 1H-Imidazole-4-ethanamine dihydrochloride                      | Histamine          |        | Agonist    |                             |                     |                    | Fu, L.W., et al., Endogenous histamine stimulates ischemically sensitive abdominal visceral afferents through H1 receptors. <i>Am. J. Physiol.</i> 273(6 Pt 2), 2726 (1997)                                |
| 08       | D07           | H 8627 | 127-07-1    | 76.06                 | Hydroxyurea                                             |                                                                | DNA Metabolism     | Enzyme | Inhibitor  | Ribonucleoside reductase    | Yes                 | 50 mg/ml           | Lassmann, G., et al., EPR stopped-flow studies of the reaction of the tyrosyl radical of protein R2 from ribonucleotide reductase with hydroxyurea <i>Biochem. Biophys. Res. Comm.</i> 188, 879-887 (1992) |
| 08       | D08           | H 9382 | 81012-99-9  | 211.09                | 3-Hydroxybenzylhydrazine dihydrochloride                | NSD-1015; alpha-Hydrazino-m-cresol dihydrochloride             | Biochemistry       | Enzyme | Inhibitor  | Amino acid decarboxylase    |                     |                    | Goodale, D.B., and Moore, K.E., <i>Life Sci.</i> 19, 701 (1976)                                                                                                                                            |
| 08       | D09           | H-121  |             | 364.30                | H-7 dihydrochloride                                     | 1-(5-Isouquinolinesulfonyl)-2-methylpiperazine dihydrochloride | Phosphorylation    | Enzyme | Inhibitor  | PKC                         | Yes                 | 104 mg/ml          | Hu, et al., Modulation of nicotinic Ach-, GABAA- and 5-HT3-receptor functions by external H-7, a protein kinase inhibitor, in rat sensory neurons <i>Br. J. Pharmacol.</i> 122, 1195 (1977)                |
| 08       | D10           | I 0157 | 50847-11-5  | 230.31                | Ibudilast                                               | KC-404                                                         | Cyclic Nucleotides | Enzyme | Inhibitor  | PDE IV                      | Yes                 | 4.5 mg/ml          | Suzumura, A., et al., Ibudilast suppresses TNFaproduction by glial cells functioning mainly as type III phosphodiesterase inhibitor in CNS. <i>Brain Res.</i> 837, 203-212 (1999)                          |
| 08       | D11           | I 1656 | 57852-57-0  | 497.51                | Idarubicin                                              | Idamycin                                                       | DNA Metabolism     |        | Inhibitor  |                             |                     |                    | Borchmann, P., et al., Idarubicin: a brief overview on pharmacology and clinical use. <i>Int. J. Clin. Pharmacol. Ther.</i> 35, 80-83 (1997)                                                               |
| 08       | E02           | G-110  | 23256-50-0  | 291.14                | Guanabenz acetate                                       | WY-8678                                                        | Adrenoceptor       |        | Agonist    | alpha2                      | Yes                 | 11 mg/ml           | Holmes, et al., Guanabenz. A review of its pharmacodynamic properties and therapeutic efficacy in hypertension. <i>Drugs</i> 26, 212-229 (1983)                                                            |
| 08       | E03           | H 0131 | 55-10-7     | 198.18                | (±)-Vanillylmandelic acid                               | (±)-4-Hydroxy-3-methoxymandelic acid                           | Adrenoceptor       |        | Metabolite |                             |                     |                    | Pani, A.K., and Ancil, M., Evidence for biosynthesis and catabolism of monoamines in the sea pansy <i>Renilla koelikeri</i> (Cnidaria) <i>Neurochem. Int.</i> 25, 465-474 (1994)                           |
| 08       | E04           | H 1877 | 32673-41-9  | 134.57                | 4-Imidazolemethanol hydrochloride                       | 4-(Hydroxymethyl)imidazole hydrochloride                       | Histamine          | Enzyme | Inhibitor  | Histinol Dehydrogenase      |                     |                    | Weerasinghe, G.R., et al., <i>Dalton Trans.</i> 2004 Jul 15;63 (6):485-9                                                                                                                                   |
| 08       | E05           | L 4408 | 7447-41-8   | 42.39                 | Lithium Chloride                                        |                                                                | Neurotransmission  | Enzyme | Inhibitor  | Inositol monophosphatase II | Yes                 | 1 M @ 20C          | Musgrave, I.F., and Badoer, E., Harmane produces hypotension following microinjection into the RVLM: possible role of I(1)-imidazoline receptors <i>Br. J. Pharmacol.</i> 129, 1057-1059 (2000)            |
| 08       | E06           | H 7258 | 486-84-0    | 182.23                | Harmane                                                 | Aribine                                                        | Imidazoline        |        | Agonist    |                             |                     |                    |                                                                                                                                                                                                            |
| 08       | E07           | H 8645 | 29617-43-4  | 383.40                | (+)-Hydrastine                                          | (+)-beta-Hydrastine 1(S),9(R)                                  | GABA               |        | Antagonist | GABA-A                      |                     |                    | Huang, et al., (+)-Hydrastine a potent competitive antagonist at mammalian GABAAR receptors <i>Br. J. Pharmacol.</i> 99, 727 (1990)                                                                        |
| 08       | E08           | H 9523 | 153-98-0    | 212.68                | Serotonin hydrochloride                                 | 5-HT hydrochloride                                             | Serotonin          |        | Agonist    |                             | Yes                 | 17 mg/ml           | Bpmasera, S.J., Tecott, L.H., Mouse models of serotonin receptor function: toward a genetic dissection of serotonin systems. <i>Pharmacol. Ther.</i> 88, 133 (2000)                                        |
| 08       | E09           | H-127  | 116679-83-5 | 386.03                | Hexahydro-sila-difenidol hydrochloride, p-fluoro analog | p-F-HHSID hydrochloride                                        | Cholinergic        |        | Antagonist | M3>M1>M2                    | Slightly Soluble    | 1.5 mg/ml          | Lambrecht, G., et al., Affinity profiles of hexahydro-sila-difenidol analogues at muscarinic receptor subtypes <i>Eur. J. Pharmacol.</i> 168, 71-80 (1989)                                                 |



| Rack No. | Rack Position | CATNUM | CAS number  | Mol. Weight Structure | Name                                           | Secondary Name                                                                                       | Class             | Enzyme | Action     | Selectivity        | Solubility in Water | Solubility in DMSO | Reference                                                                                                                                                                                              |
|----------|---------------|--------|-------------|-----------------------|------------------------------------------------|------------------------------------------------------------------------------------------------------|-------------------|--------|------------|--------------------|---------------------|--------------------|--------------------------------------------------------------------------------------------------------------------------------------------------------------------------------------------------------|
| 08       | E10           | I 0375 | 3251-69-2   | 162.58                | Imidazole-4-acetic acid hydrochloride          | I4AA                                                                                                 | GABA              |        | Antagonist | GABA-C             |                     |                    | Chebib, M., et al., GABA(C) receptor antagonists differentiate between human rho1 and rho2 receptors expressed in Xenopus oocytes Eur. J. Pharmacol. 357, 227 (1998)                                   |
| 08       | E11           | I 1899 | 93515-00-5  | 358.18                | 2-Iodomelatonin                                | N-Acetyl-2-iodo-5-methoxytryptamine                                                                  | Melatonin         |        | Agonist    |                    | Yes                 | 2.5 mg/ml          | Iuvone, M.P. and Gan, J.J. Neurochem. 63, 118 (1994)                                                                                                                                                   |
| 08       | F02           | G-111  | 90237-02-8  | 240.24                | gamma-D-Glutamylaminomethylsulfonic acid       | GAMS                                                                                                 | Glutamate         |        | Antagonist | Kainate            | Yes                 |                    | Davies, et al., Depressant actions of gamma-D-glutamylaminomethyl sulfonate (GAMS) on amino acid-induced and synaptic excitation in the cat spinal cord Brain Res. 327, 113 (1985)                     |
| 08       | F03           | H 0627 | 2208-41-5   | 248.28                | 6-Hydroxymelatonin                             | 3-(N-Acetylaminoethyl)-6-hydroxy-5-methoxyindole                                                     | Melatonin         |        | Metabolite |                    |                     |                    | Pang, C.S., et al., Comparison of the pharmacological characteristics of 2-[125I]iodomelatonin binding sites in the lung, spleen, brain and kidney of chicken Biol. Signals 4, 311 (1995)              |
| 08       | F04           | H 2138 | 60-25-3     | 273.29                | Hexamethonium dichloride                       | N,N,N,N,N',N'-Hexamethyl-1,6-hexanediaminium dichloride                                              | Cholinergic       |        | Antagonist | Nicotinic          | Yes                 |                    | Lawson, C.J., et al., The effects of l-glucose on memory in mice are modulated by peripherally acting cholinergic drugs. Neurobiol. Learn. Mem. 77, 17 (2002)                                          |
| 08       | F05           | H 4759 | 58-93-5     | 297.74                | Hydrochlorothiazide                            | 6-Chloro-3,4-dihydro-2H-1,2,4-benzothiadiazine-7-sulfonamide 1,1-dioxide                             | Biochemistry      | Enzyme | Inhibitor  | Carbonic anhydrase |                     |                    | Chung, N.A., et al., Blood Press. 2004; 13(3):183-189                                                                                                                                                  |
| 08       | F06           | H 7278 | 53598-01-9  | 250.26                | NG-Hydroxy-L-arginine acetate                  | NOHA acetate                                                                                         | Nitric Oxide      | Enzyme | Metabolite | NOS                |                     |                    | Klatt, P., et al., J. Biol. Chem. 268, 14781 (1993)                                                                                                                                                    |
| 08       | F07           | H 8653 | 159795-63-8 | 328.30                | (±)-7-Hydroxy-DPAT hydrobromide                | (±)-7-OH-DPAT HBr; (±)-Hydroxy-dipropylaminotetralin hydrobromide                                    | Dopamine          |        | Agonist    | D3                 | Yes                 | >15 mg/ml          | Maj, J., et al., Effect of antidepressant drugs administered repeatedly on the dopamine D3 receptors in the rat brain Eur. J. Pharmacol. 351, 31 (1998)                                                |
| 08       | F08           | L 2167 | 79558-09-1  | 402.45                | L-165,041                                      | 4-[3-(4-Acetyl-3-hydroxy-2-propylphenoxy)propoxy]phenoxy acetic acid                                 | Lipid Signaling   |        | Agonist    | PPAR-gamma         |                     |                    | Berger, J., et al., Novel peroxisome proliferator-activated receptor (PPAR) and PPAR ligands produce distinct biological effects. J. Biol. Chem. 274, 6718-6725 (1999)                                 |
| 08       | F09           | H-128  | 75614-87-8  | 198.10                | Histamine, R(-)-alpha-methyl-, dihydrochloride | R(-)-alpha-Methylhistamine dihydrochloride                                                           | Histamine         |        | Agonist    | H3                 | Yes                 |                    | Gerhard, et al., Structure-activity relations of histamine analogs. XX. Absolute configuration and histamine-like activity of enantiomeric-methyl histamines Arch. Pharm. Res. 313, 709 (1980)         |
| 08       | F10           | I 0404 |             | 277.28                | Indirubin-3'-oxime                             | Indirubin-3'-monoxime                                                                                | Phosphorylation   | Enzyme | Inhibitor  | CDK                | Yes                 |                    | Hoessel, R., Nature Cell Biol. 1, 60 (1999)                                                                                                                                                            |
| 08       | F11           | S 2318 | 181629-93-6 | 431.39                | SB 228357                                      | N-[3-Fluoro-5-(3-pyridinyl)phenyl]-2,3-dihydro-5-methoxy-6-(trifluoromethyl)-1H-indole-1-carboxamide | Serotonin         |        | Antagonist | 5-HT2B/2C          | Insoluble           |                    | Reavill, C., et al., Br. J. Pharmacol. 126, 572-574 (1999)                                                                                                                                             |
| 08       | G02           | G-117  | 29094-61-9  | 445.54                | Glipizide                                      |                                                                                                      | K+ Channel        |        | Blocker    | ATP-sensitive      |                     |                    | Raeburn, et al., RP 49356 and cromakalim relax airway smooth muscle in vitro by opening a sulfonylurea-sensitive K+ channel: A comparison with nifedipine J. Pharmacol. Exp. Ther. 256, 480-485 (1991) |
| 08       | G03           | H 0879 | 55-97-0     | 362.19                | Hexamethonium bromide                          | Hexane-1,6-bis(trimethylammonium bromide)                                                            | Cholinergic       |        | Antagonist | Nicotinic          |                     |                    | Lawson, C.J., et al., The effects of l-glucose on memory in mice are modulated by peripherally acting cholinergic drugs. Neurobiol. Learn. Mem. 77, 17 (2002)                                          |
| 08       | G04           | H 2270 | 125-04-2    | 484.53                | Hydrocortisone 21-hemisuccinate sodium         | Cortisol 21-hemisuccinate sodium                                                                     | Hormone           |        |            | Cortisol           | Yes                 | 50 mg/ml           | Kang, B.S., et al., Biol Pharm Bull. 2001 Jun;24(6):701-3                                                                                                                                              |
| 08       | G05           | S 8817 |             | 396.45                | SB 218795                                      | (-)-(R)-N-(alpha-methoxycarbonylbenzyl)-2-phenylquinoline-4-carboxamide                              | Neurotransmission |        | Antagonist | NK3                | Insoluble           |                    | Medhurst, A.D., et al., Br. J. Pharmacol. 122, 469-476 (1997)                                                                                                                                          |
| 08       | G06           | H 7779 | 65646-68-6  | 391.56                | Retinoic acid p-hydroxyanilide                 | N-(4-Hydroxyphenyl)retinamide                                                                        | Cell Cycle        |        | Inhibitor  |                    |                     |                    | Marth, C., et al., Effect of 4-hydroxyphenylretinamide and retinoic acid on proliferation and cell cycle of cultured human breast cancer cells J. Natl. Cancer Inst. 75, 871-875 (1985)                |
| 08       | G07           | H 8759 | 73124-20-4  | 302.35                | MHPG sulfate potassium                         | 4-Hydroxy-3-methoxyphenylglycol-4-sulfate potassium                                                  | Adrenoceptor      |        | Metabolite |                    | Yes                 | 50 mg/ml           | Eisenhofer, G., et al., Mesenteric organ production, hepatic metabolism, and renal elimination of norepinephrine and its metabolites in humans. J. Neurochem. 66, 1573 (1996)                          |

| Rack No. | Rack Position | CATNUM | CAS number  | Mol. Weight Structure | Name                                 | Secondary Name                                                                    | Class              | Enzyme | Action     | Selectivity       | Solubility in Water | Solubility in DMSO | Reference                                                                                                                                                                                                                              |
|----------|---------------|--------|-------------|-----------------------|--------------------------------------|-----------------------------------------------------------------------------------|--------------------|--------|------------|-------------------|---------------------|--------------------|----------------------------------------------------------------------------------------------------------------------------------------------------------------------------------------------------------------------------------------|
| 08       | G08           | H 9772 | 145224-90-4 | 220.23                | 5-Hydroxy-L-tryptophan               | S(+)-1-alpha-Amino-5-hydroxyindole-3-propionic acid                               | Serotonin          |        | Precursor  |                   | Yes                 | 10 mg/ml           | Fickbohm, D.J., Katz, P.S., Paradoxical actions of the serotonin precursor 5-hydroxytryptophan on the activity of identified serotonergic neurons in a simple motor circuit. J. Neurosci. 20, 1622 (2000)                              |
| 08       | G09           | H-135  | 624-00-0    | 210.25                | 5-hydroxydecanoic acid sodium        |                                                                                   | K+ Channel         |        | Blocker    |                   | Yes                 |                    | Grover, et al., Pharmacologic profile of cromakalim in the treatment of myocardial ischemia in isolated rat hearts and anesthetized dogs. J. Cardiovasc. Pharmacol. 16, 853 (1990)                                                     |
| 08       | G10           | N 1786 |             | 310.39                | NSC 95397                            | 2,3-bis[(2-Hydroxyethyl)thio]-1,4-naphthoquinone                                  | Phosphorylation    | Enzyme | Inhibitor  | Cdc25             |                     |                    | Lazo, J.S., et al., Identification of a potent and selective pharmacophore for Cdc25 dual specificity phosphatase inhibitors. Mol. Pharmacol. 61, 720-728 (2002)                                                                       |
| 08       | G11           | I 2279 |             | 374.68                | IMID-4F hydrochloride                | 2-[N-(2,6-dichlorophenyl)-N-(4-fluorobenzyl)amino]-2-imidazoline hydrochloride    | K+ Channel         |        | Blocker    |                   |                     |                    | McPherson, G.A., Functional and electrophysiological effects of a novel imidazoline-based K(ATP) channel blocker, IMID-4F. Br. J. Pharmacol. 128, 1636 (1999)                                                                          |
| 08       | H02           | G-119  | 102771-26-6 | 329.79                | GYKI 52466 hydrochloride             | 1-(4-Aminophenyl)-4-methyl-7,8-methylenedioxy-5H-2,3-benzodiazepine hydrochloride | Glutamate          |        | Antagonist | AMPA/kainate      | Insoluble           |                    | Donevan, et al., GYKI 52466, a 2,3-benzodiazepine is a highly selective, non-competitive antagonist of AMPA/kainate receptor responses. Neuron 10, 51 (1993)                                                                           |
| 08       | H03           | H 1252 | 306-08-1    | 182.18                | 4-Hydroxy-3-methoxyphenylacetic acid | Homovanillic acid; HVA                                                            | Dopamine           |        | Metabolite |                   |                     |                    | Guilbault, G.G., et al., Anal. Chem. 40, 190 (1968)                                                                                                                                                                                    |
| 08       | H04           | H 2380 | 21373-30-8  | 213.19                | 6-Hydroxy-DL-DOPA                    | 2,5-Dihydroxy-DL-tyrosine                                                         | Adrenoceptor       |        | Neurotoxin |                   | Yes                 | 3.0 mg/ml          | Lin, J.Y., et al., Effects of systemic administration of 6-hydroxydopamine, 6-hydroxydopa and 1-methyl-4-phenyl-1,2,3,6-tetrahydropyridine (MPTP) on tuberoinfundibular dopaminergic neurons in the rat Brain Res. 624, 126-130 (1993) |
| 08       | H05           | H 5257 | 555-55-5    | 246.22                | Hispidin                             | 6-(3,4-dihydroxystyryl)-4-hydroxy-2-pyrone                                        | Phosphorylation    | Enzyme | Inhibitor  | PKC-beta          |                     |                    | Gonindard, C., et al., Synthetic hispidin, a PKC inhibitor, is more cytotoxic toward cancer cells than normal cells in vitro. Cell Biol. Toxicol. 13, 141-153 (1997)                                                                   |
| 08       | H06           | H 8034 |             | 388.43                | HE-NECA                              | 2-Hexynyl-5-ethylcarboxamidoadenosine                                             | Adenosine          |        | Agonist    | A2                | Insoluble           |                    | Vittori, S. et al., Nucleosides and Nucleotides 18, 739-740 (1999)                                                                                                                                                                     |
| 08       | H07           | H 8876 | 54-16-0     | 191.19                | 5-Hydroxyindolacetic acid            | 5-HIAA                                                                            | Serotonin          |        | Metabolite |                   |                     |                    | Brown, G.L., Linnoila, M.J., CSF serotonin metabolite (5-HIAA) studies in depression, impulsivity, and violence. J. Clin. Psychiatry 51, 42 (1990)                                                                                     |
| 08       | H08           | H 9876 | 5470--11--1 | 69.49                 | Hydroxylamine hydrochloride          |                                                                                   | Neurotransmission  | Enzyme | Inhibitor  | MAO               |                     |                    | Roh, J.H., Purification, characterization, and crystallization of monoamine oxidase from Escherichia coli K-12. Biosci. Biotechnol. Biochem. 58, 1652 (1994)                                                                           |
| 08       | H09           | H-140  | 78095-19-9  | 328.30                | R-(+)-8-Hydroxy-DPAT hydrobromide    | (+)-8-Hydroxy-2-(dipropylamino)tetralin hydrobromide                              | Serotonin          |        | Agonist    | 5-HT1A            | Yes                 | >20 mg/ml          | Bjork, et al., Resolved N,N'-dialkylated 2-amino-8-hydroxytetralins: Stereoselective interactions with 5-HT1A receptors in the brain. J. Med. Chem. 32, 779 (1989)                                                                     |
| 08       | H10           | I 0782 | 84243-58-3  | 240.27                | Imazodan                             | Cl 914                                                                            | Cyclic Nucleotides | Enzyme | Inhibitor  | PDE II            |                     |                    | Mochizuke, N., et al, Cardiovascular effects of NSP-804 and NSP-805, novel cardiotonic agents with vasodilator properties J. Cardiovasc. Pharmacol. 21, 983-995 (1993)                                                                 |
| 08       | H11           | I 2760 | 54750-10-6  | 361.35                | R(-)-Isoproterenol (+)-bitartrate    |                                                                                   | Adrenoceptor       |        | Agonist    | beta              |                     |                    | Chi, O.Z., et al., Effects of isoproterenol on blood-brain barrier permeability in rats. Neurol. Res. 20, 259-264 (1998)                                                                                                               |
| 09       | A02           | I 2764 | 110448-33-4 | 452.74                | ML-7                                 | 1-(5-Iodonaphthalene-1-sulfonyl)-1H-hexahydro-1,4-diazepine hydrochloride         | Phosphorylation    | Enzyme | Inhibitor  | MLCK              |                     |                    | Makishima, M., et al., FEBS Lett. 287, 175 (1991)                                                                                                                                                                                      |
| 09       | A03           | I 5879 | 28822-58-4  | 222.25                | 3-Isobutyl-1-methylxanthine          | IBMX                                                                              | Adenosine          | Enzyme | Inhibitor  | Phosphodiesterase |                     |                    | Elks, M.L., and Manganiello, V.C., A role for soluble cAMP phosphodiesterases in differentiation of 3T3-L1 adipocytes J. Cell Physiol. 124, 191-198 (1985)                                                                             |
| 09       | A04           | I 7627 | 305-33-9    | 277.22                | Iproniazid phosphate                 |                                                                                   | Neurotransmission  | Enzyme | Inhibitor  | MAO               |                     |                    | Ito, K., et al., Manganese-mediated oxidative damage of cellular and isolated DNA by iproniazid and related hydrazines: non-Fenton-type hydroxyl radical formation Biochemistry 31, 11606-11613 (1992)                                 |
| 09       | A05           | I 9890 | 80663-95-2  | 648.26                | m-Iodobenzylguanidine hemisulfate    | MIBG                                                                              | Apoptosis          |        | Activator  |                   |                     |                    | Smets, L.A., et al., Cancer Chemother. Pharmacol. 21, 9 (1988)                                                                                                                                                                         |

| Rack No. | Rack Position | CATNUM | CAS number  | Mol. Weight Structure | Name                                                           | Secondary Name                                                                                                                                                | Class           | Enzyme | Action     | Selectivity         | Solubility in Water | Solubility in DMSO | Reference                                                                                                                                                                                                                                               |
|----------|---------------|--------|-------------|-----------------------|----------------------------------------------------------------|---------------------------------------------------------------------------------------------------------------------------------------------------------------|-----------------|--------|------------|---------------------|---------------------|--------------------|---------------------------------------------------------------------------------------------------------------------------------------------------------------------------------------------------------------------------------------------------------|
| 09       | A06           | I-135  | 32385-58-3  | 332.06                | Imetit dihydrobromide                                          | S-[2-(4-Imidazol-4-yl)ethyl]isothioureaa dihydrochloride                                                                                                      | Histamine       |        | Agonist    | H3                  | Yes                 |                    | Garbarg, et al., S-[2-(4-Imidazol)ethyl]isothioureaa highly specific and potent histamine H3receptor agonist J. Pharmacol. Exp. Ther. 263, 304 (1992)                                                                                                   |
| 09       | A07           | J-102  |             | 307.40                | JL-18                                                          | 8-Methyl-6-(4-methyl-1-piperaziny)-11H-pyrido[2,3-b][1,4]benzodiazepine                                                                                       | Dopamine        |        | Antagonist | D4>D2               | 0.33 mg/ml          |                    | Liegeois, et al., Eur J Pharmacol. 1995;273:R1-R3.                                                                                                                                                                                                      |
| 09       | A08           | K 3888 |             | 327.18                | Kenpaullone                                                    | NSC 664704                                                                                                                                                    | Phosphorylation | Enzyme | Inhibitor  | CDK1, CDK2, CDK5    | Yes                 | 5.0 mg/ml          | Schultz, C., et al., Paullones, a series of cyclin-dependent kinase inhibitors: synthesis, evaluation of CDK1/cyclin B inhibition, and in vitro antitumor activity J. Med. Chem. 42, 2909-2919 (1999)                                                   |
| 09       | A09           | L 2411 |             | 452.55                | LY-367,265                                                     | 1-[2-[4-(6-fluoro-1H-indol-3-yl)-3,6-dihydro-1(2H)-pyridinyl]ethyl]-5,6-dihydro-1H,4H-[1,2,5]thiadiazolo[4,3,2-ij]quinoline-2,2-dioxide                       | Serotonin       |        | Antagonist | Reuptake            |                     |                    | Pullar, I.A., LY367265, an inhibitor of the 5-hydroxytryptamine transporter and 5-hydroxytryptamine(2A) receptor antagonist: a comparison with the antidepressant, nefazodone. Eur. J. Pharmacol. 407, 39 (2000)                                        |
| 09       | A10           | L 5025 | 75706-12-6  | 270.21                | Leflunomide                                                    | 5-Methylisoxazole-4-(4-trifluoromethylcarboxanilide)                                                                                                          | Immune System   | Enzyme | Inhibitor  |                     |                     |                    | Brazelton, T.R., and Morris, R.E., Curr. Opin. Immunol. 8, 710 (1996)                                                                                                                                                                                   |
| 09       | A11           | L 8789 | 244240-24   | 360.01                | LFM-A13                                                        | alpha-Cyano-beta-hydroxy-beta-methyl-N-(2,5-dibromophenyl)propenamide                                                                                         | Phosphorylation | Enzyme | Inhibitor  | BTK                 |                     |                    | Mahajan, S., et al., Rational design and synthesis of a novel anti-leukemic agent targeting Bruton's tyrosine kinase (BTK), LFM-A13 [a-cyano-b-hydroxy-b-methyl-N-(2,5-dibromophenyl)propenamide]. Vitamin E: A Comprehensive Treatise 274, 9587 (1999) |
| 09       | B02           | I 2765 | 2552-55-8   | 158.11                | (±)-Ibotenic acid                                              | (±)-alpha-Amino-3-hydroxy-5-isoxazoleacetic acid                                                                                                              | Glutamate       |        | Agonist    | NMDA                | Yes                 | 1.0 mg/ml          | Scholz, An ibotenate-selective metabotropic glutamate receptor mediates protein phosphorylation in cultured hippocampal pyramidal neurons J. Neurochem. 62, 1764 (1994)                                                                                 |
| 09       | B03           | I 6138 | 79944-56-2  | 240.69                | Idazoxan hydrochloride                                         | RX 781094                                                                                                                                                     | Imidazoline     |        | Ligand     | I1 / I2             | Yes                 | 300 mg/ml          | Clarke, R.W., et al., Imidazoline I(2)-receptors and spinal reflexes in the decerebrated rabbit Neuropharmacology 39, 1904-1912 (2000)                                                                                                                  |
| 09       | B04           | I 8005 | 14638-70-1  | 361.35                | S(+)-Isoproterenol (+)-bitartrate                              |                                                                                                                                                               | Adrenoceptor    |        |            | beta                |                     |                    | Huang C.C., et al., J Neurosci. 1998 Mar 15;18(6):2276-82 Review                                                                                                                                                                                        |
| 09       | B05           | I-106  | 51146-56-6  | 206.29                | S(+)-Ibuprofen                                                 | S-(+)-2-(4-Isobutylphenyl)propionic acid                                                                                                                      | Prostaglandin   | Enzyme | Inhibitor  | COX                 |                     |                    | Mehvar, et al., Liquid chromatography assay of ibuprofen enantiomers in plasma Clin. Chem. 34, 493-496 (1988)                                                                                                                                           |
| 09       | B06           | I-138  | 5154-02-9   | 161.16                | 1,5-Isoquinolinediol                                           | 1,5-Dihydroxyisoquinoline                                                                                                                                     | Apoptosis       | Enzyme | Inhibitor  | PARS                | Insoluble           |                    | Zhang, J., et al., Nitric oxide activation of poly(ADP-ribose) synthase in neurotoxicity. Science 263, 687-689 (1994)                                                                                                                                   |
| 09       | B07           | K 0250 | 58002-62-3  | 213.24                | Kainic acid                                                    | 2-Carboxy-3-carboxymethyl-4-isopropenylpyrrolidine                                                                                                            | Glutamate       |        | Agonist    | Kainate             | Yes                 |                    | Coyle, J.T., Kainic acid: insights into excitatory mechanisms causing selective neuronal degeneration Ciba Found. Symp. 126, 186-203 (1987)                                                                                                             |
| 09       | B08           | K 4262 | 39089-30-0  | 377.53                | Karakoline                                                     |                                                                                                                                                               | Cholinergic     |        | Antagonist | Nicotinic           |                     |                    | Sultankhodjaev, Chem. Nat. Cpds. 2, 199 (1973)                                                                                                                                                                                                          |
| 09       | B09           | L 2536 |             | 430.95                | LY-310,762 hydrochloride                                       |                                                                                                                                                               | Serotonin       |        | Antagonist | 5-HT1D              | Insoluble           |                    | Pullar, et al., Eur. J. Pharmacol. 407, 39 (2000)                                                                                                                                                                                                       |
| 09       | B10           | V 1889 |             | 626.39                | VER-3323 hemifumarate salt                                     | (S)-1-(6-Bromo-2,3-dihydroindol-1-yl)-2-propylamine hemifumarate salt                                                                                         | Serotonin       |        | Agonist    | 5-HT2C/5-HT2B       | Yes                 | 9.0 mg/ml          |                                                                                                                                                                                                                                                         |
| 09       | B11           | N 0287 |             | 564.58                | NNC 55-0396                                                    | (1S,2S)-2-(2-(N-((3-Benzimidazol-2-yl)propyl)-N-methylamino)ethyl)-6-fluoro-1,2,3,4-tetrahydro-1-isopropyl-2-naphthyl cyclopropanecarboxylate dihydrochloride | Ca2+ Channel    |        | Inhibitor  | T-type              | 15 mg/ml            |                    | Huang, L., et al., J. Pharmacol. Exp. Ther. 309, 193-199 (2004)                                                                                                                                                                                         |
| 09       | C02           | I 2892 | 23210-58-4  | 801.00                | Ifenprodil tartrate                                            | alpha-(4-Hydroxyphenyl)-beta-(4-benzylpiperidin-1-yl)-beta-methylethanol tartrate                                                                             | Glutamate       |        | Blocker    | Polyamine site NMDA |                     |                    | Carter, et al., Ifenprodil and SL 82.0715 are antagonists at the polyamine site of the N-methyl-D-aspartate (NMDA) receptor Eur. J. Pharmacol. 164, 611 (1989)                                                                                          |
| 09       | C03           | I 6391 | 140663-38-3 | 364.30                | 1-(5-Isoquinoliny)sulfonyl)-3-methylpiperazine dihydrochloride | Iso-H-7                                                                                                                                                       | Phosphorylation | Enzyme | Inhibitor  | PKC                 |                     |                    |                                                                                                                                                                                                                                                         |
| 09       | C04           | I 8021 | 150403-89-7 | 223.70                | L-N6-(1-Iminoethyl)lysine hydrochloride                        | L-NIL                                                                                                                                                         | Nitric Oxide    | Enzyme | Inhibitor  | iNOS                |                     |                    | Moore, W.M., et al., J. Med. Chem. 37, 3886 (1994)                                                                                                                                                                                                      |

| Rack No. | Rack Position | CATNUM | CAS number  | Mol. Weight Structure | Name                                      | Secondary Name                                                                                                                                         | Class                 | Enzyme | Action     | Selectivity          | Solubility in Water | Solubility in DMSO | Reference                                                                                                                                                                                                                         |
|----------|---------------|--------|-------------|-----------------------|-------------------------------------------|--------------------------------------------------------------------------------------------------------------------------------------------------------|-----------------------|--------|------------|----------------------|---------------------|--------------------|-----------------------------------------------------------------------------------------------------------------------------------------------------------------------------------------------------------------------------------|
| 09       | C05           | I-114  | 108294-53-7 | 392.46                | p-Iodoclonidine hydrochloride             | 2-[(2,6-Dichloro-4-iodophenyl)imino]imidazolin hydrochloride                                                                                           | Adrenoceptor          |        | Agonist    | alpha2               | Yes                 |                    | Van Dor, T., Radiolabeled p-iodoclonidine: A high-affinity probe for the alpha2-adrenergic receptor. J. Med. Chem. 30, 1241 (1987)                                                                                                |
| 09       | C06           | I-139  | 130383-75-4 | 404.25                | S(-)-IBZM                                 | Iodobenzamide                                                                                                                                          | Dopamine              |        | Ligand     | D2                   | Slightly Soluble    | <0.5 mg/ml         | Cordes, et al., Initial experience with SPECT examinations using [123I]IBZM as a D2-dopamine receptor antagonist in Parkinson's disease Eur. J. Radiol. 12, 182 (1991)                                                            |
| 09       | C07           | K 1003 | 65277-42-1  | 531.44                | Ketoconazole                              | cis-1-Acetyl-4-[[2-(2,4-dichlorophenyl)-2-(1H-imidazol-1-ylmethyl)-1,3-dioxolan-4-yl]methoxy]phenyl]-piperazine                                        | Multi-Drug Resistance | Enzyme | Inhibitor  | Cytochrome P450c17   |                     |                    | Von Moltke, L.L., et al., Clin. Pharmacokinet. 29 (Suppl 1), 33 (1995)                                                                                                                                                            |
| 09       | C08           | L 0258 | 142326-59-8 | 363.80                | L-701,324                                 | 7-Chloro-4-hydroxy-3-(3-phenoxy)phenylquinolin-2[1H]-one                                                                                               | Glutamate             |        | Antagonist | NMDA-Glycine         |                     |                    | Bristow, L.J., et al., Anticonvulsant and behavioral profile of L-701,324a potentially active antagonist at the glycine modulatory site on the N-methyl-D-aspartate receptor complex J. Pharmacol. Exp. Ther. 279, 492-501 (1996) |
| 09       | C09           | L 2540 |             | 591.24                | L-368,899                                 | 1-((7,7-Dimethyl-2(S)-(2(S)-amino-4-(methylsulfonyl)butyramido)bicyclo[2.2.1]heptan-1(S)-yl)methylsulfonyl)-4-(2-methylphenyl)piperazine hydrochloride | Neurotransmission     |        | Antagonist | Oxytocin receptor    | Yes                 | 20 mg/ml           | Cui, S.S. et al., J. Neurosci. 24, 9867-9876 (2001)                                                                                                                                                                               |
| 09       | C10           | L 5647 | 6108-05-0   | 270.81                | Lidocaine hydrochloride                   |                                                                                                                                                        | Na+ Channel           |        | Modulator  |                      | Yes                 |                    | Argoff C.E., Clin J Pain. 2000 Jun;16(2 Suppl):S62-6 Review                                                                                                                                                                       |
| 09       | C11           | L 9539 | 103253-15-2 | 373.86                | L-655,240                                 | 3-[1-(4-Chlorobenzyl)-5-fluoro-3-methyl-indol-2-yl]-2,2-dimethyl propanoic acid                                                                        | Thromboxane           |        | Antagonist | TXA2                 | Insoluble           |                    | Bunke, M., et al., Protection of glomerular filtration rate by the thromboxane receptor antagonist L-655,240 during low dose cyclosporine administration Prostaglandins 43, 351-360 (1992)                                        |
| 09       | D02           | I 3639 | 7279-75-6   | 335.42                | Isotharine mesylate                       | 4-[1-Hydroxy-2-[(1-methylethyl)amino]butyl]-1,2-benzenediol mesylate                                                                                   | Adrenoceptor          |        | Agonist    | beta                 |                     |                    | Charan, N.B., et al., Nitric oxide and adrenergic agonist-induced bronchial arterial vasodilation. J. Appl. Physiol. 82, 686-692 (1997)                                                                                           |
| 09       | D03           | I 6504 | 5984-95-2   | 247.72                | (-)-Isoproterenol hydrochloride           | (-)-Isoprenaline hydrochloride                                                                                                                         | Adrenoceptor          |        | Agonist    | beta                 |                     |                    | Chi, O.Z., et al., Effects of isoproterenol on blood-brain barrier permeability in rats. Neurol. Res. 20, 259-264 (1998)                                                                                                          |
| 09       | D04           | I 8250 | 70-78-0     | 307.09                | 3-Iodo-L-tyrosine                         | S(-)-3-Iodo-4-hydroxyphenylalanine                                                                                                                     | Neurotransmission     | Enzyme | Inhibitor  | Tyrosine hydroxylase |                     |                    | Fitzpatrick, P.F., Steady-state kinetic mechanism of rat tyrosine hydroxylase. Biochemistry 30, 3658-3662 (1991)                                                                                                                  |
| 09       | D05           | I-117  | 54197-31-8  | 357.24                | R(+)-IAA-94                               | R(+)-Methylindazole, Indanyloxyacetic acid 94                                                                                                          | Cl- Channel           |        | Inhibitor  |                      | Yes                 | 0.2 mg/ml          | Landry, et al., Epithelial chloride channel: Development of inhibitory ligands J. Gen. Physiol. 90, 779-798 (1987)                                                                                                                |
| 09       | D06           | I-146  | 152918-18-8 | 510.29                | IB-MECA                                   | 1-Deoxy-1-[6-[[[3-iodophenyl)methyl]amino]-9H-purin-9-yl]-N-methyl-beta-D-ribofuranuronamide                                                           | Adenosine             |        | Agonist    | A3                   | Insoluble           |                    | Jacobson, et al., A role for central A3-adenosine receptors. Mediation of behavioral depressant effects. FEBS Lett. 336, 57-60 (1993)                                                                                             |
| 09       | D07           | K 1136 | 74103-07-4  | 376.41                | Ketorolac tris salt                       | Toradol                                                                                                                                                | Prostaglandin         | Enzyme | Inhibitor  | COX                  | Yes                 | 15 mg/ml           | Laneville, O., Differential inhibition of human prostaglandin endoperoxide H synthases-1 and -2 by nonsteroidal antiinflammatory drugs. J. Pharmacol. Exp. Ther. 271, 927 (1994)                                                  |
| 09       | D08           | L 0664 | 68767-14-6  | 246.31                | Ioxoprofen                                | Koloxo                                                                                                                                                 | Prostaglandin         | Enzyme | Inhibitor  | COX                  |                     |                    | Sugimoto, M., Inhibition of prostaglandin production in the inflammatory tissue by ioxoprofen-Na, an anti-inflammatory prodrug. Biochem. Pharmacol. 42, 2363 (1991)                                                               |
| 09       | D09           | L 2906 | 98079-51-7  | 387.82                | Lomefloxacin hydrochloride                |                                                                                                                                                        | Antibiotic            | Enzyme | Inhibitor  | DNA Gyrase           |                     |                    | Croom K.F., et al., Drugs. 2003;63(24):2769-802 Review                                                                                                                                                                            |
| 09       | D10           | L 5783 | 21306-56-9  | 343.31                | Lidocaine N-ethyl bromide quaternary salt | QX-314                                                                                                                                                 | Na+ Channel           |        | Antagonist |                      |                     |                    | Regehr, W.G. and Tank, D.W., J. Neurosci. 12, 4202-4223 (1992)                                                                                                                                                                    |
| 09       | D11           | L 9664 | 79794-75-5  | 382.89                | Loratadine                                | 4-(8-chloro-5,6-dihydro-11H-benzo[5,6]cyclohepta[1,2-b]pyridin-11-ylidene-1-piperidinecarboxylic acid ethyl ester                                      | Histamine             |        | Antagonist | H1                   | Insoluble           |                    | Baroody, F.M. and Naclerio, R.M., AMA Arch. Pathol. 55 Suppl. 64, 17 (2000)                                                                                                                                                       |
| 09       | E02           | I 3766 | 961-29-5    | 256.26                | Isoliquiritigenin                         | 2',4'-Trihydroxychalcone                                                                                                                               | Cyclic Nucleotides    | Enzyme | Activator  | Guanylyl cyclase     | Yes                 | >0.1 mg/ml         | Yamamoto, et al., The potent anti-tumor-promoting agent isoliquiritigenin Carcinogenesis 12, 317-323 (1991)                                                                                                                       |

| Rack No. | Rack Position | CATNUM | CAS number  | Mol. Weight Structure | Name                                                                    | Secondary Name                                                                                                          | Class             | Enzyme | Action     | Selectivity    | Solubility in Water | Solubility in DMSO | Reference                                                                                                                                                                                                                                   |
|----------|---------------|--------|-------------|-----------------------|-------------------------------------------------------------------------|-------------------------------------------------------------------------------------------------------------------------|-------------------|--------|------------|----------------|---------------------|--------------------|---------------------------------------------------------------------------------------------------------------------------------------------------------------------------------------------------------------------------------------------|
| 09       | E03           | I 7016 | 108930-17-2 | 364.30                | 1-(5-Isoquinolylsulfonyl)-2-methylpiperazine dihydrochloride            | H-7 dihydrochloride                                                                                                     | Phosphorylation   | Enzyme | Inhibitor  | PKA / PKC      | Yes                 | 20 mg/ml           | Hidaka, H., et al., Biochemistry 23, 5036 (1984)                                                                                                                                                                                            |
| 09       | E04           | I 8768 | 150403-88-6 | 209.68                | L-N5-(1-Iminoethyl)ornithine hydrochloride                              | L-NIO                                                                                                                   | Nitric Oxide      | Enzyme | Inhibitor  | NOS            |                     |                    | McCall, T.B., et al., Br. J. Pharmacol. 102, 234 (1991)                                                                                                                                                                                     |
| 09       | E05           | I-119  | 96850-13-4  | 328.67                | Indatraline hydrochloride                                               | Lu 19-005                                                                                                               | Dopamine          |        | Inhibitor  | Reuptake       | Yes                 | 2.0 mg/ml          | Arnt, J, et al., Pharmacology in vivo of the phenylindan derivative, Lu 19-005, a new potent inhibitor of dopamine, noradrenaline and 5-hydroxytryptamine uptake in rat brain. Naunyn-Schmiedeberg's Arch. Pharmacol. FB329, 101-107 (1985) |
| 09       | E06           | I-151  |             | 426.90                | Indomethacin morpholinylamide                                           | BML-190                                                                                                                 | Cannabinoid       |        | Ligand     | CB2            | Insoluble           |                    | Gallant, et al., New class of potent ligands for the human peripheral cannabinoid receptor Bioorg. Med. Chem. Lett. 6, 2263-2268 (1996)                                                                                                     |
| 09       | E07           | K 1751 | 22071-15-4  | 254.29                | Ketoprofen                                                              | 2-(3-Benzoylphenyl)propionic acid                                                                                       | Prostaglandin     | Enzyme | Inhibitor  | COX-1          |                     |                    | Cryer, B., , Feldman, M., Cyclooxygenase-1 and cyclooxygenase-2 selectivity of widely used nonsteroidal anti-inflammatory drugs. Am. J. Med. 104, 413 (1998)                                                                                |
| 09       | E08           | L 1011 | 32780-64-6  | 364.88                | Labetalol hydrochloride                                                 | 2-Hydroxy-5-(1-hydroxy-2-[(1-methyl-3-phenylpropyl)amino]ethyl)benzamide hydrochloride                                  | Adrenoceptor      |        | Antagonist | beta           | Yes                 |                    | Riva, E., et al., Thea- and b-adrenoceptor blocking activities of labetalol and its RR-SR (50:50) stereoisomers Br. J. Pharmacol. 104, 823-828 (1991)                                                                                       |
| 09       | E09           | L 3791 | 84057-84-1  | 256.10                | Lamotrigine                                                             | GI 267119X; 6-(2,3-dichlorophenyl)-1,2,4-triazine-3,5-diamine                                                           | Anticonvulsant    |        |            |                | Insoluble           |                    | Laughlin, T.M. et al., J. Pharmacol. Exp. Ther. 302, 1168-1175 (2002)                                                                                                                                                                       |
| 09       | E10           | L 8397 | 88264-65-7  | 337.42                | L-Leucinethiol, oxidized dihydrochloride                                | Dithiobis(2-amino-4-methylpentane)                                                                                      | Biochemistry      | Enzyme | Inhibitor  | Aminopeptidase |                     |                    | Chan, W., W-C., Biochem. Biophys. Res. Comm. 116, 297 (1983)                                                                                                                                                                                |
| 09       | E11           | L 9756 | 16595-80-5  | 240.76                | (-)-Tetramisole hydrochloride                                           | Levamisole hydrochloride                                                                                                | Phosphorylation   | Enzyme | Inhibitor  |                |                     |                    | Van Belle, H., Biochim. Biophys. Acta 289, 158 (1972)                                                                                                                                                                                       |
| 09       | F02           | I 4883 | 15687-27-1  | 206.29                | (±)-Ibuprofen                                                           | alpha-Methyl-4-(isobutyl)phenylacetic acid                                                                              | Prostaglandin     | Enzyme | Inhibitor  | COX            |                     |                    | Chen, C.S., et al., Metabolic stereoisomeric inversion of 2-arylpropionic acids. On the mechanism of ibuprofen epimerization in rats Biochim. Biophys. Acta 1033, 1 (1990)                                                                  |
| 09       | F03           | I 7378 | 53-86-1     | 357.80                | Indomethacin                                                            |                                                                                                                         | Prostaglandin     | Enzyme | Inhibitor  | COX            |                     |                    | Laneville, O., et al., Differential inhibition of human prostaglandin endoperoxide H synthases-1 and -2 by nonsteroidal anti-inflammatory drugs J. Pharmacol. Exp. Ther. 271, 927-934 (1994)                                                |
| 09       | F04           | I 8898 | 70288-86-7  | 875.12                | Ivermectin                                                              | MK-933                                                                                                                  | Cholinergic       |        | Modulator  | alpha7 nACh    | Insoluble           |                    | Adelsberger, H., et al., A patch clamp study of a glutamatergic chloride channel on pharyngeal muscle of the nematode Ascaris suum. Neurosci. Lett. 230, 183-186 (1997)                                                                     |
| 09       | F05           | I-120  | 95896-48-3  | 339.65                | Iofetamine hydrochloride                                                | N-Isopropyl-p-iodoamphetamine hydrochloride                                                                             | Neurotransmission |        | Analog     |                |                     |                    | Rupright J., et al., Brain Inj. 1997 Jan;11(1):49-57                                                                                                                                                                                        |
| 09       | F06           | I-160  |             | 364.83                | 3-(1H-imidazol-4-yl)propyl di(p-fluorophenyl)methyl ether hydrochloride |                                                                                                                         | Histamine         |        | Antagonist | H3             | Yes                 | >4.0 mg/ml         | Huls, A., et al., Diphenylmethyl ethers: Synthesis and histamine H3-receptor antagonist in vitro and in vivo activity Bioorg. Med. Chem. Lett. 6, 2013-2018 (1996)                                                                          |
| 09       | F07           | K 1888 |             | 376.50                | K 185                                                                   | N-Butanoyl 2-(5,6,7-trihydro-11-methoxybenzo[c]cyclohept[2,1-a]indol-13-yl)ethanamine                                   | Melatonin         |        | Antagonist |                |                     |                    | Faust, R. et al., J. Med. Chem. 43, 1050 (2000)                                                                                                                                                                                             |
| 09       | F08           | L 1415 | 151488-11-8 | 582.79                | L-162,313                                                               | (5,7-dimethyl-2-ethyl-3-[[4-(2-n-butyloxycarbonylsulfonamido)-5-isobutyl-3-thienyl]phenyl]methyl]imidazo[4,5,6]pyridine | Neurotransmission |        | Agonist    | AT1            |                     |                    | Vianello, B. et al., Eur. J. Pharmacol. 347, 113-118 (1998)                                                                                                                                                                                 |
| 09       | F09           | L 4376 | 134-63-4    | 373.93                | alpha-lobeline hydrochloride                                            | (-)-Lobeline hydrochloride                                                                                              | Cholinergic       |        | Agonist    | Nicotinic      | Yes                 | 25 mg/ml           | Damaj, M.I., et al., Pharmacology of lobeline, a nicotinic receptor ligand J. Pharmacol. Exp. Ther. 282, 410-419 (1997)                                                                                                                     |
| 09       | F10           | L 8401 |             | 290.41                | LE 300                                                                  | 7-Methyl-6,7,8,9,14,15-hexahydro-5H-benz[d]indolo[2,3-g]azecine                                                         | Dopamine          |        | Antagonist | D1             | Insoluble           |                    | Witt, T., 7-Methyl-6,7,8,9,14,15-hexahydro-5H-benz[d]indolo[2,3-g]azecine: a new heterocyclic system and a new lead compound for dopamine receptor antagonists J. Med. Chem. 43, 2079 (2000)                                                |

| Rack No. | Rack Position | CATNUM | CAS number  | Mol. Weight Structure | Name                             | Secondary Name                                                                                                     | Class           | Enzyme | Action     | Selectivity              | Solubility in Water | Solubility in DMSO | Reference                                                                                                                                                                                                                  |
|----------|---------------|--------|-------------|-----------------------|----------------------------------|--------------------------------------------------------------------------------------------------------------------|-----------------|--------|------------|--------------------------|---------------------|--------------------|----------------------------------------------------------------------------------------------------------------------------------------------------------------------------------------------------------------------------|
| 09       | F11           | L 9787 |             | 341.37                | L-655,708                        | Ethyl (S)-11,12,13,13a-Tetrahydro-7-methoxy-9-oxo-9H-imidazo[1,5-a]pyrrolo[2,1-c][1,4]benzodiazepine-1-carboxylate | Benzodiazepine  |        | Ligand     | GABA-A                   | Insoluble           |                    | Quirk, K. et al., [3H]-655,708, a novel ligand selective for the benzodiazepine site of GABA <sub>A</sub> receptors which contain the $\alpha$ 5 subunit Neuropharmacology 356, 1331-1335 (1996)                           |
| 09       | G02           | I 5531 |             | 348.45                | IIK7                             | N-Butanoyl 2-(9-methoxy-6H-isoindolo[2,1-a]indol-11-yl)ethanamine                                                  | Melatonin       |        | Agonist    |                          |                     |                    | Faust, R. et al., J. Med. Chem. 43, 1050 (2000)                                                                                                                                                                            |
| 09       | G03           | I 7379 | 113-52-0    | 316.88                | Imipramine hydrochloride         |                                                                                                                    | Serotonin       |        | Blocker    | Reuptake                 | Yes                 | 50 mg/ml           | Wood, M.D., Examination of the relationship between the uptake site for 5-hydroxytryptamine and the high affinity binding site for [3H]imipramine. II. The role of sodium ions Neuropharmacology 26, 1081-1085 (1987)      |
| 09       | G04           | I 9531 |             | 280.76                | Imiloxan hydrochloride           | RS 21361                                                                                                           | Adrenoceptor    |        | Antagonist | alpha2B                  | Yes                 | 50 mg/ml           | Michel, A.D. et al., Assessment of imiloxan as a selective $\alpha$ 2B-adrenoceptor antagonist.                                                                                                                            |
| 09       | G05           | I-122  | 121264-04-8 | 501.84                | ICI 204,448 hydrochloride        |                                                                                                                    | Opioid          |        | Agonist    | kappa                    | Yes                 | 4.5 mg/ml          | Shaw, et al., ICI 204448: A kappa-opioid agonist with limited access to the CNS Br. J. Pharmacol. 96, 986-992 (1989)                                                                                                       |
| 09       | G06           | I18008 | 498-94-2    | 129.16                | Isonipetric acid                 | 4-Piperidine carboxylic acid                                                                                       | GABA            |        | Agonist    | GABA-A                   |                     |                    | Krehan D., et al., Neurochem Int. 203 Jun;42(7):561-5                                                                                                                                                                      |
| 09       | G07           | K 2628 | 34580-14-8  | 425.51                | Ketotifen fumarate               |                                                                                                                    | Histamine       |        | Antagonist | H1                       |                     |                    | Ohkawa, et al., Histamine H1 receptor and reactivity of the nasal mucosa in sensitized guinea pigs Auris. Nasus. Larynx. 26, 293 (1999)                                                                                    |
| 09       | G08           | L 1788 |             | 256.78                | Lidocaine N-methyl hydrochloride | QX-222                                                                                                             | Na+ Channel     |        | Blocker    |                          | Yes                 |                    | Inagaki, et al., Characterization of antihistamines using biphasic cutaneous reaction in BALB/c mice. Life Sci. 63, 145 (1998)                                                                                             |
| 09       | G09           | L 4762 | 34552-83-5  | 513.51                | Loperamide hydrochloride         |                                                                                                                    | Opioid          |        | Ligand     |                          |                     |                    | Church, J., et al., Loperamide blocks high-voltage-activated calcium channels and N-methyl-D-aspartate-evoked responses in rat and mouse cultured hippocampal pyramidal neurons. Mol. Pharmacol. 45, 747-757 (1994)        |
| 09       | G10           | L 8533 | 103577-45-3 | 369.37                | Lansoprazole                     |                                                                                                                    | Ion Pump        |        | Inhibitor  | H+ pump                  |                     |                    | Barradell, L.B., et al., Drugs 44, 225 (1992)                                                                                                                                                                              |
| 09       | G11           | L 9908 | 154447-36-6 | 343.81                | LY-294,002 hydrochloride         | 2-(4-Morpholinyl)-8-phenyl-4H-1-benzopyran-4-one hydrochloride                                                     | Phosphorylation | Enzyme | Inhibitor  | PI3K                     | Yes                 |                    | Vlahos, C.J., et al., A specific inhibitor of phosphatidylinositol 3-kinase 2-(4-morpholinyl)-8-phenyl-4H-1-benzopyran-4-one (LY294002). J. Biol. Chem. 269, 5241 (1994)                                                   |
| 09       | H02           | I 5627 | 51-30-9     | 247.72                | (±)-Isoproterenol hydrochloride  |                                                                                                                    | Adrenoceptor    |        | Agonist    | beta                     |                     |                    | Chi, O.Z., et al., Effects of isoproterenol on blood-brain barrier permeability in rats. Neurol. Res. 20, 259-264 (1998)                                                                                                   |
| 09       | H03           | I 7388 | 529-61-1    | 179.14                | Isoxanthopterin                  | 2-Amino-4,7-dihydroxypteridine                                                                                     | Cell Stress     | Enzyme | Metabolite |                          |                     |                    | Mest, S.J., et al., 2,6-Dichlorophenolindophenol is a competitive inhibitor for xanthine oxidase and is therefore not usable as an electron acceptor in the fluorometric assay. Free Radical Biol. Med. 12, 189-192 (1992) |
| 09       | H04           | I 9778 |             | 548.66                | CR 2945                          | Itriglumide                                                                                                        | Cholecystokinin |        | Antagonist | CCK-B                    | Yes                 | 4.2 mg/ml          | Revel, L., et al., CR 2945: a novel CCK <sub>B</sub> receptor antagonist with anxiolytic-like activity. Behav. Pharmacol. 9, 183-194 (1998)                                                                                |
| 09       | H05           | I-127  | 72795-19-8  | 313.87                | ICI 118,551 hydrochloride        | (±)-1-[2,3-(Dihydro-7-methyl-1H-inden-4-yl)oxy]-3-[(1-methylethyl)amino]-2-butanol hydrochloride                   | Adrenoceptor    |        | Antagonist | beta2                    | Yes                 | 8.0 mg/ml          | Bilski, A.J., et al., The pharmacology of $\alpha$ 2-selective adrenoceptor antagonist (ICI 118,551). J. Cardiovasc. Pharmacol. 5, 430-437 (1983)                                                                          |
| 09       | H06           | J 4252 | 155471-08-2 | 327.43                | JWH-015                          | (2-Methyl-1-propyl-1H-indol-3-yl)-1-naphthalenylmethanone                                                          | Cannabinoid     |        | Agonist    | CB2                      |                     |                    | Griffin, G., et al., Evidence for the presence of CB2-like cannabinoid receptors on peripheral nerve terminals Eur. J. Pharmacol. 339, 53-61 (1997)                                                                        |
| 09       | H07           | K 3375 | 492-27-3    | 189.17                | Kynurenic acid                   | 4-Hydroxyquinoline-2-carboxylic acid                                                                               | Glutamate       |        | Antagonist | NMDA-Glycine             |                     |                    | Stone, T.W., Neuropharmacology of quinolinic and kynurenic acids. Neuropharmacology 45, 309-379 (1993)                                                                                                                     |
| 09       | H08           | L 2037 | 4707-32-8   | 242.28                | beta-Lapachone                   |                                                                                                                    | Apoptosis       |        | Activator  |                          |                     |                    | Li, C.J., et al., J. Biol. Chem. 268, 22463 (1993)                                                                                                                                                                         |
| 09       | H09           | L 4900 | 50264-69-2  | 321.17                | Lonidamine                       | Diclonazolic acid                                                                                                  | Cell Stress     | Enzyme | Inhibitor  | Mitochondrial hexokinase |                     |                    | Ben-Horin, H., et al., Cancer Res. 55, 2814 (1995)                                                                                                                                                                         |

| Rack No. | Rack Position | CATNUM | CAS number  | Mol. Weight Structure | Name                           | Secondary Name                                                                                   | Class                | Enzyme | Action     | Selectivity           | Solubility in Water | Solubility in DMSO | Reference                                                                                                                                                                                                                       |
|----------|---------------|--------|-------------|-----------------------|--------------------------------|--------------------------------------------------------------------------------------------------|----------------------|--------|------------|-----------------------|---------------------|--------------------|---------------------------------------------------------------------------------------------------------------------------------------------------------------------------------------------------------------------------------|
| 09       | H10           | L 8539 |             | 327.90                | L-687,384 hydrochloride        | 1'-Benzyl-3,4-dihydrospiro[naphthalene-1-(2H),4-piperidine] hydrochloride                        | Opioid               |        | Agonist    | sigma1                | Insoluble           |                    | Couture, S and Debonnel, G., Some of the effects of the selective sigma ligand (+)pentazocine are mediated via a naloxone-sensitive receptor. Synapse 39, 323-331 (2001)                                                        |
| 09       | H11           | L-106  | 27833-64-3  | 445.91                | Loxapine succinate             |                                                                                                  | Dopamine             |        | Antagonist |                       | Yes                 |                    | Shen, Y., et al., Molecular cloning and expression of a 5-hydroxytryptamine7 serotonin receptor subtype J. Biol. Chem. 268, 18200-18204 (1993)                                                                                  |
| 10       | A02           | L-107  | 60634-51-7  | 500.60                | LY-53,857 maleate              | 6-Methyl-1-(1-methylethyl)-ergoline-8beta-carboxylic acid 2-hydroxy-1-methylpropyl ester maleate | Serotonin            |        | Antagonist | 5-HT2/5-HT1C          | Yes                 | 5.9 mg/ml          | Cohen, et al., LY 53,857 a selective and potent serotonergic (5-HT2) receptor antagonist, does not lower blood pressure in the spontaneously hypertensive rat. J. Pharmacol. Exp. Ther. 227, 327 (1983)                         |
| 10       | A03           | L-133  |             | 527.67                | L-750,667 trihydrochloride     | (±)-3-[4-Iodophenyl]-1-piperazyl methylpyrrolo [2,3-b] pyrimidine                                | Dopamine             |        | Antagonist | D4                    | Yes                 | 2.5 mg/ml          | Kulagowski, et al., 3-[[4-(4-Chlorophenyl)piperazin-1-yl]-methyl]-1H-pyrrolo[2,3-b]pyridine: An antagonist with high affinity and selectivity for the human dopamine D4receptor. J. Med. Chem. 39, 1941 (1996)                  |
| 10       | A04           | M 1387 | 56010-88-9  | 118.57                | 4-Methylpyrazole hydrochloride | Fomepizole                                                                                       | Biochemistry         | Enzyme | Inhibitor  | Alcohol dehydrogenase |                     |                    | Li, T.-K., and Theorell, H.,Acta Chem. Scand. 23, 892 (1969)                                                                                                                                                                    |
| 10       | A05           | M 2381 | 1019-45-0   | 308.34                | 5-Methoxy DMT oxalate          | 5-Methoxy-N,N-dimethyltryptamine hydrogen oxalate                                                | Serotonin            |        | Agonist    |                       |                     |                    | Winter, J.C., The paradox of 5-methoxy-N,N-dimethyltryptamine: an indoleamine hallucinogen that induces stimulus control via 5-HT1Areceptors. Pharmacol. Biochem. Behav. 65, 75 (2000)                                          |
| 10       | A06           | M 2901 | 25717-80-0  | 242.24                | Molsidomine                    | SIN-10                                                                                           | Nitric Oxide         |        | Donor      |                       |                     |                    | Nitz, R.E. and Fiedler, V.B.,Pharmacotherapy 7, 28 (1987)                                                                                                                                                                       |
| 10       | A07           | M 3668 | 17692-51-2  | 403.53                | Metergoline                    | [[[(8beta)-1,6-Dimethylergolin-8-yl]-methyl]carbamic acid phenylmethyl ester                     | Serotonin            |        | Antagonist | 5-HT2/5-HT1D          | Insoluble           |                    | Miller, K.J., et al., Agonist activity of sumatriptan and metergoline at the human 5-HT1D beta receptor: further evidence for a role of the 5-HT1D receptor in the action of sumatriptan. Eur. J. Pharmacol. 227, 99-102 (1992) |
| 10       | A08           | M 4531 | 6385-02-0   | 318.14                | Meclofenamic acid sodium       | 2-[(2,6-Dichloro-3-methylphenyl)amino]benzoic acid sodium                                        | Prostaglandin        | Enzyme | Inhibitor  | COX / 5-Lipoxygenase  |                     |                    | Boctor, A.M., et al.,Prostaglandins Leukotrienes Med. 23, 229 (1986)                                                                                                                                                            |
| 10       | A09           | M 5391 | 56392-17-7  | 684.83                | (±)-Metoprolol (+)-tartrate    | 1-(Isopropylamino)-3-(p-[beta-methoxyethyl]phenoxy)-2-propanol tartrate                          | Adrenoceptor         |        | Antagonist | beta1                 | Yes                 | 50 mg/ml           | Brynne, L., et al., Concentration-effect relationship of l-propranolol and metoprolol in spontaneous hypertensive rats after exercise-induced tachycardia. J. Pharmacol. Exp. Ther. 286, 1152-1158 (1998)                       |
| 10       | A10           | M 6316 |             | 486.53                | MRS 1754                       | 8-[4-[(4-Cyanophenyl)carbamoylmethyl]oxy]phenyl]-1,3-di(n-propyl)xanthine                        | Adenosine            |        | Antagonist | A2B                   | Yes                 | <2.4 mg/ml         | Kim, Y.-C. et al.,J. Med. Chem. 43, 1165-1172 (2000)                                                                                                                                                                            |
| 10       | A11           | M 6690 | 88191-84-8  | 382.46                | MDL 28170                      | Z-Val-Phe-CHO                                                                                    | Cell Cycle           | Enzyme | Inhibitor  | Calpain I / II        | Insoluble           |                    | Mehdi, S., et al., Inhibition of the proteolysis of rat erythrocyte membrane proteins by a synthetic inhibitor of calpain. Biochem. Biophys. Res. Comm. 157, 1117-1123 (1988)                                                   |
| 10       | B02           | L-109  | 97964-56-2  | 481.40                | Lorglumide sodium              | CR 1409                                                                                          | Cholecystokinin      |        | Antagonist | CCK-A                 | Yes                 | 10 mg/ml           | Makovec, F., et al., Pharmacological properties of lorglumide as a member of a new class of cholecystokinin antagonists Arzneimittel.-Forsch. 37, 1265-1268 (1987)                                                              |
| 10       | B03           | L-134  | 105431-72-9 | 391.48                | Linopirdine                    | DuP 996                                                                                          | Cholinergic          |        | Releaser   |                       | Insoluble           |                    | Maciag, et al., Studies on the role of K+Cl-and Na+ion permeabilities in the acetylcholine release enhancing effects of linopirdine (DuP 996) in rat cortical slices J. Pharmacol. Exp. Ther. 271, 891-897 (1994)               |
| 10       | B04           | M 1404 | 31430-18-9  | 301.33                | Nocodazole                     | R 17934                                                                                          | Cytoskeleton and ECM |        | Inhibitor  | beta-tubulin          | Insoluble           |                    | Luduena, R.F., and Roach, M.C, Tubulin sulfinhydryl groups as probes and targets for antimitotic and antimicrotubule agents. Pharmacol. Ther. 49, 133-152 (1991)                                                                |
| 10       | B05           | M 2398 | 5874-97-5   | 520.60                | Metaproterenol hemisulfate     |                                                                                                  | Adrenoceptor         |        | Agonist    | beta2                 |                     |                    | Krumins, A.M., and Barber, R., Examination of the effects of increasing Gs protein on2-adrenergic receptor, Gs, and adenylyl cyclase interactions. Biochem. Pharmacol. 54, 61-72 (1997)                                         |

| Rack No. | Rack Position | CATNUM | CAS number  | Mol. Weight Structure | Name                                                                   | Secondary Name                                                                                                                                          | Class              | Enzyme | Action     | Selectivity       | Solubility in Water | Solubility in DMSO | Reference                                                                                                                                                                                                                                                                    |
|----------|---------------|--------|-------------|-----------------------|------------------------------------------------------------------------|---------------------------------------------------------------------------------------------------------------------------------------------------------|--------------------|--------|------------|-------------------|---------------------|--------------------|------------------------------------------------------------------------------------------------------------------------------------------------------------------------------------------------------------------------------------------------------------------------------|
| 10       | B06           | M 2922 | 66548-69-4  | 278.24                | 3-Methyl-6-(3-(trifluoromethyl)phenyl)-1,2,4-triazolo[4,3-b]pyridazine | CL 218,872                                                                                                                                              | Benzodiazepine     |        | Agonist    | BZ1               |                     |                    | McNamara, R.K., and Corcoran, M., CL 218,872 a triazolopyridazine with a selective affinity for the benzodiazepine BZ1 receptor subtype, retards the development and expression of amygdaloid-kindled seizures: effects of flumazenil. <i>Epilepsy Res.</i> 16, 19-26 (1993) |
| 10       | B07           | U-106  | 121843-48-9 | 519.43                | (-)-cis-(1S,2R)-U-50488 tartrate                                       | (-)-(1S,2R)-cis-3,4-Dichloro-N-methyl-N-[2-(1-pyrrolidinyl)cyclohexyl]benzenecetamide tartrate                                                          | Neurotransmission  |        | Ligand     | Sigma receptor    |                     |                    | de Costa, et al., Alterations in the stereochemistry of thek-selective opioid agonist U50488 results in high-affinityligands. <i>J. Med. Chem.</i> 32, 1996 (1989)                                                                                                           |
| 10       | B08           | M 4659 | 78415-72-2  | 211.23                | Milrinone                                                              | 1,6-Dihydro-2-methyl-6-oxo-[3,4'-bipyridine]-5-carbonitrile                                                                                             | Cyclic Nucleotides | Enzyme | Inhibitor  | PDE III           | Insoluble           |                    | Weiss, H.R., et al., Cyclic GMP and cyclic AMP induced changes in control and hypertrophic cardiac myocyte function interact through cyclic GMP affected cyclic-AMP phosphodiesterases. <i>Can. J. Physiol. Pharmacol.</i> 77, 422-431 (1999)                                |
| 10       | B09           | M 5435 | 219911-35-0 | 229.71                | 6-Methyl-2-(phenylethynyl)pyridine hydrochloride                       | MPEP hydrochloride                                                                                                                                      | Glutamate          |        | Antagonist | mGluR5            | Yes                 | 10 mg/ml           | Gasparini, F. et al., <i>Neuropharmacology</i> 38, 1493-1503 (1999)                                                                                                                                                                                                          |
| 10       | B10           | M 6383 | 362-07-2    | 302.42                | 2-methoxyestradiol                                                     | 2-Hydroxyestradiol 2-methyl ether                                                                                                                       | Hormone            |        | Metabolite | Estrogen          | Insoluble           |                    | Yue, T., et al., <i>Mol. Pharmacol.</i> 51, 951-962 (1997)                                                                                                                                                                                                                   |
| 10       | B11           | M 6760 | 529-44-2    | 318.24                | Myricetin                                                              | Cannabiscetin                                                                                                                                           | Phosphorylation    | Enzyme | Inhibitor  | Casein Kinase II  |                     |                    | Molina-Jimenez M.F., et al., <i>Brain Res.</i> 2004 May 29;1009(1-2):9-16                                                                                                                                                                                                    |
| 10       | C02           | L-110  | 109216-58-2 | 414.47                | LY-278,584 maleate                                                     | 1-Methyl-N-(8-methyl-8-azabicyclo[3.2.1]oct-3-yl)-1H-indazole-3-carboxamide maleate                                                                     | Serotonin          |        | Antagonist | 5-HT3             | Yes                 |                    | Fludzinski, et al., Indazoles as indole bio-isosteres: Synthesis and evaluation of the tropanyl ester and amide of indazole-3-carboxy-late as antagonists at the serotonin 5-HT3receptor. <i>J. Med. Chem.</i> 30, 1535-1537 (1987)                                          |
| 10       | C03           | L-135  |             | 340.86                | L-741,626                                                              | (±)-3-[4-(4-Chlorophenyl)-4-hydroxypiperidinyl]methylindole                                                                                             | Dopamine           |        | Antagonist | D2                | Insoluble           |                    | Kulagowski, et al., 3-[[4-(4-Chlorophenyl)piperazin-1-yl]-methyl]-1H-pyrrolo[2,3-b]pyridine: An antagonist with high affinity and selectivity for the human dopamine D4receptor. <i>J. Med. Chem.</i> 39, 1941 (1996)                                                        |
| 10       | C04           | M 1514 | 1975-81-1   | 280.28                | N-omega-Methyl-5-hydroxytryptamine oxalate salt                        | N-omega-Methylserotonin                                                                                                                                 | Serotonin          |        | Ligand     |                   |                     |                    | Shapiro, D.A., Differential modes of agonist binding to 5-hydroxytryptamine(2A) serotonin receptors revealed by mutation and molecular modelling of conserved residues in transmembrane region 5. <i>Mol. Pharmacol.</i> 58, 877 (2000)                                      |
| 10       | C05           | M 2525 | 21535-47-7  | 300.83                | Mianserin hydrochloride                                                | 1,2,3,4,10,14b-Hexahydro-2-methylidibenzol[c,f]pyrrolo[1,2-a]zepine hydrochloride                                                                       | Serotonin          |        | Antagonist |                   | Yes                 | 3.4 mg/ml          | Leitch, I.M., et al., Pharmacological evaluation of the histamine H1 and 5-HT blocking properties of 2-N-(carboxamidinonormianserin) (FCC5):in vitro studies. <i>J. Pharm. Pharmacol.</i> 44, 315-320 (1992)                                                                 |
| 10       | C06           | M 3047 | 50924-49-7  | 259.22                | Mizoribine                                                             | N'-(beta-D-Ribofuranosyl)-5-hydroxyimidazole-4-carboxamide                                                                                              | DNA Metabolism     | Enzyme | Inhibitor  | IMP dehydrogenase |                     |                    | Napoli, K.L., <i>J. Inter. Fed. Clin. Chem.</i> 4, 15 (1992)                                                                                                                                                                                                                 |
| 10       | C07           | M 3778 | 17780-75-5  | 308.64                | Clorgyline hydrochloride                                               | N-Methyl-N-propargyl-3-(2,4-dichlorophenoxy)-propylamine hydrochloride                                                                                  | Neurotransmission  | Enzyme | Inhibitor  | MAO-A             |                     |                    | Figueiredo, I.V., et al., The role of MAO-A and MAO-B in the metabolic degradation of noradrenaline in human arteries. <i>J. Auton. Pharmacol.</i> 18, 123-128 (1998)                                                                                                        |
| 10       | C08           | M 4796 | 146669-29-6 | 209.20                | (±)-alpha-Methyl-4-carboxyphenylglycine                                | (±)-MCPG                                                                                                                                                | Glutamate          |        | Antagonist | Metabotropic      |                     |                    | Schoepp, D.D., et al., LY354740 is a potent and highly selective group II metabotropic glutamate receptor agonist in cells expressing human glutamate receptors. <i>Neuropharmacology</i> 36, 1-11 (1997)                                                                    |
| 10       | C09           | M 5441 | 116666-63-8 | 568.56                | Mibefradil dihydrochloride                                             | Ro 40-5967; (1S,2S)-2-[[[3-(2-benzimidazolylpropyl)methylamino]ethyl]-6-fluoro-1,2,3,4-tetrahydro-1-isopropyl-2-naphthyl methoxyacetate dihydrochloride | Ca2+ Channel       |        | Blocker    | T-type            | Yes                 | 24 mg/ml           | Mishra, S.K., and Hermsmeyer, K., <i>CRC Handbook of Microbiology</i> 75, 144 (1994)                                                                                                                                                                                         |
| 10       | C10           | M 6500 | 156-57-0    | 113.61                | Cysteamine hydrochloride                                               | Mercaptamine; MEA hydrochloride                                                                                                                         | Somatostatin       |        | Depletter  |                   |                     |                    | Khomenko T, et al., <i>Biochem Biophys Res Commun.</i> 2004 Apr 23;317(1):121-7                                                                                                                                                                                              |
| 10       | C11           | M 7033 | 53308-83-1  | 248.28                | NG-Monomethyl-L-arginine acetate                                       | L-NMMA                                                                                                                                                  | Nitric Oxide       | Enzyme | Inhibitor  | NOS               |                     |                    | Sakuma, I., et al., Identification of arginine as a precursor of endothelium-derived relaxing factor. <i>Proc. Natl. Acad. Sci. USA</i> 85, 8664-8667 (1988)                                                                                                                 |



| Rack No. | Rack Position | CATNUM | CAS number  | Mol. Weight Structure | Name                                                      | Secondary Name                                                                             | Class              | Enzyme | Action     | Selectivity | Solubility in Water | Solubility in DMSO | Reference                                                                                                                                                                                                                                     |
|----------|---------------|--------|-------------|-----------------------|-----------------------------------------------------------|--------------------------------------------------------------------------------------------|--------------------|--------|------------|-------------|---------------------|--------------------|-----------------------------------------------------------------------------------------------------------------------------------------------------------------------------------------------------------------------------------------------|
| 10       | D02           | L-118  | 18016-80-3  | 454.53                | R(+)-Lisuride hydrogen maleate                            | R(+)-N'-(8alpha)-9,10-Didehydro-6-methylergolin-8-yl]-N,N-diethylurea hydrogen maleate     | Dopamine           |        | Agonist    | D2          | Insoluble           |                    | Sundaram, H., et al. Characterisation of recombinant serotonin 5-HT1A receptors expressed in Chinese hamster ovary cells: the agonist [3H]lisuride labels free receptor and receptor coupled to G protein. J. Neurochem. 65, 1909-1916 (1995) |
| 10       | D03           | L-137  | 148700-85-0 | 439.83                | L-733,060 hydrochloride                                   | (2S,3S) 3-((3,5-Bis(trifluoromethyl)phenyl)methoxy)-2-phenylpiperidine hydrochloride       | Tachykinin         |        | Antagonist | NK1         | Insoluble           |                    | Seabrook, G., et al., L-733,060a novel tachykinin NK receptor antagonist: effects in [Ca2+] immobilisation cardiovascular and dural extravasation assays Eur. J. Pharmacol. 317, 129 (1996)                                                   |
| 10       | D04           | M 1559 |             | 278.14                | Moxonidine hydrochloride                                  | BDF-5895                                                                                   | Adrenoceptor       |        | Agonist    | alpha2A     |                     |                    | Bing, C., et al., The effect of moxonidine on feeding and body fat in obese Zucker rats: role of hypothalamic NPY neurones. Br. J. Pharmacol. 127, 35-42 (1999)                                                                               |
| 10       | D05           | M 2537 | 73573-88-3  | 390.52                | Mevastatin                                                | Compactin                                                                                  | Antibiotic         | Enzyme | Inhibitor  | Ras, Rho    |                     |                    | Brown, M.S., et al., Induction of 3-hydroxy-3-methylglutaryl coenzyme A reductase activity in human fibroblasts incubated with compactin (ML-236B), a competitive inhibitor of the reductase. J. Biol. Chem. 253, 1121 (1978)                 |
| 10       | D06           | M 3127 | 867-44-7    | 278.37                | S-Methylisothiourea hemisulfate                           | Carbamimidothioic acid methyl ester hemisulfate                                            | Nitric Oxide       | Enzyme | Inhibitor  | iNOS        |                     |                    | Southan G.J., Br J Pharmacol. 1995 Jan;114(2):510-6                                                                                                                                                                                           |
| 10       | D07           | M 3808 | 101204-49-3 | 459.30                | MRS 2179                                                  | 2'-Deoxy-N6-methyl adenosine 3',5'-diphosphate diammonium salt                             | P2 Receptor        |        | Antagonist | P2Y1        | Yes                 | 11 mg/ml           | Baurande, Eur. J. Pharmacol. 412, 213 (2001)                                                                                                                                                                                                  |
| 10       | D08           | M 4910 | 6481-48-7   | 198.10                | 1-Methylhistamine dihydrochloride                         |                                                                                            | Histamine          |        | Metabolite |             |                     |                    | Eglen, et al., The interaction of parafluoro-hexahydro-sila-diphenidol at muscarinic receptors in vitro. Br. J. Pharmacol. 99, 637 (1990)                                                                                                     |
| 10       | D09           | M 5501 | 1867-73-8   | 281.27                | N6-Methyladenosine                                        | 6-Methylaminopurine-9-ribofuranoside                                                       | Adenosine          |        | Agonist    |             | Yes                 |                    | Daly, et al., Structure-activity relationships for N6-substituted adenosines at a brain A1 adenosine receptor with a comparison to an A2 adenosine receptor regulating coronary blood flow. Biochem. Pharmacol. 35, 2467 (1986)               |
| 10       | D10           | M 6517 | 104809-20-3 | 517.08                | alpha,beta-Methylene adenosine 5'-triphosphate dillithium | alpha,beta-Methylene ATP, AMP-CPP dillithium                                               | P2 Receptor        |        | Agonist    | P2X > P2Y   | Yes                 | 21 mg/ml           | Burnstock, et al., Is there a basis for distinguishing two types of P2-purinoceptor? Gen. Pharmacol. 16, 433 (1985)                                                                                                                           |
| 10       | D11           | M 7065 | 111466-41-2 | 375.90                | MK-912                                                    | L-657,743 hydrochloride                                                                    | Adrenoceptor       |        | Agonist    | alpha2A     | Yes                 | 16 mg/ml           | Murrin, L.C. et al., Inverse agonism at alpha(2)-adrenoceptors in native tissue Eur. J. Pharmacol. 398, 185-191 (2000)                                                                                                                        |
| 10       | E02           | L-119  | 144425-84-3 | 598.49                | L-703,606 oxalate                                         | cis-2-(Diphenylmethyl)-N-((2-iodophenyl)methyl)-1-azabicyclo[2.2.2]octan-3-amine oxalate   | Tachykinin         |        | Antagonist | NK1         | Yes                 | <2.0 mg/ml         | Fong, et al., Localization of agonist and antagonist binding domains of the human neurokinin-1 receptor J. Biol. Chem. 267, 25664 (1992)                                                                                                      |
| 10       | E03           | M 0763 | 7232-21-5   | 336.26                | Metoclopramide hydrochloride                              |                                                                                            | Dopamine           |        | Antagonist | D2          | Yes                 |                    | De Winter, B.Y., Effect of different prokinetic agents and a novel enterokinetic agent on postoperative ileus in rats. Gut 45, 713 (1999)                                                                                                     |
| 10       | E04           | M 1692 |             | 398.42                | MRS 1845                                                  | N-Propargylnitrendipene                                                                    | Ca2+ Channel       |        | Inhibitor  | SOC         | Insoluble           |                    | Harper, J.L. et al., Biochem Pharmacol. 2003 Feb 1;65(3):329-38                                                                                                                                                                               |
| 10       | E05           | M 2547 | 78033-08-6  | 266.30                | 8-Methoxymethyl-3-isobutyl-1-methylxanthine               | 8-Methoxymethyl-IBMX                                                                       | Cyclic Nucleotides | Enzyme | Inhibitor  | PDE I       |                     |                    | Wells, J.N., and Miller, J.R., Meth. Enzymol. 159, 489 (1988)                                                                                                                                                                                 |
| 10       | E06           | M 3184 | 77257-42-2  | 437.37                | MG 624                                                    | N,N,N-Triethyl-2-(4-trans-stilbenoxy)ethylammonium iodide                                  | Cholinergic        |        | Antagonist | Nicotinic   | Insoluble           |                    | Gotti, C., et al., Br. J. Pharmacol. 124, 1197 (1998)                                                                                                                                                                                         |
| 10       | E07           | M 3935 | 71125-38-7  | 373.39                | Meloxicam sodium                                          | 4-Hydroxy-2-methyl-N-(5-methyl-2-thiazolyl)-2H-1,2-benzothiazine-3-carboxamide 1,1-dioxide | Prostaglandin      | Enzyme | Inhibitor  | COX-2       | Yes                 |                    | Safieh-Garabedian, B., The role of cytokines and prostaglandin-E(2) in thymulin induced hyperalgesia. Neuropharmacology 39, 1653 (2000)                                                                                                       |
| 10       | E08           | M 5154 | 964-52-3    | 315.84                | Moxisylyte hydrochloride                                  | 4-Dimethylaminoethoxy-5-isopropyl-2-methylphenyl acetate hydrochloride                     | Adrenoceptor       |        | Antagonist | alpha1      |                     |                    | Marquer, C., and Bressolle, F., Moxisylyte: a review of its pharmacodynamic and pharmacokinetic properties, and its therapeutic use in impotence. Fundam. Clin. Pharmacol. 12, 377-387 (1998)                                                 |

| Rack No. | Rack Position | CATNUM | CAS number  | Mol. Weight Structure | Name                                                | Secondary Name                                                                                            | Class             | Enzyme | Action     | Selectivity                         | Solubility in Water | Solubility in DMSO | Reference                                                                                                                                                                                                                                                                 |
|----------|---------------|--------|-------------|-----------------------|-----------------------------------------------------|-----------------------------------------------------------------------------------------------------------|-------------------|--------|------------|-------------------------------------|---------------------|--------------------|---------------------------------------------------------------------------------------------------------------------------------------------------------------------------------------------------------------------------------------------------------------------------|
| 10       | E09           | M 5560 |             | 232.60                | (S)-MAP4 hydrochloride                              | (S)-2-Amino-2-methyl-4-phosphonobutanate hydrochloride                                                    | Glutamate         |        | Antagonist | mGluR4,6,7                          |                     |                    | Salt, T.E. and Eaton, S.A., Distinct presynaptic metabotropic receptors for L-AP4 and CCG1 on GABAergic terminals: pharmacological evidence using novel-methyl derivative mGluR antagonists, MAP4 and MCCG, in the rat thalamus in vivo. <i>Neuroscience</i> 65, 5 (1995) |
| 10       | E10           | M 6524 | 61-16-5     | 247.72                | Methoxamine hydrochloride                           |                                                                                                           | Adrenoceptor      |        | Agonist    | alpha1                              |                     |                    | Lee, R.H., and Heckman, C.J., Enhancement of bistability in spinal motoneuron in vivo by the noradrenergic agonist methoxamine. <i>J. Neurophysiol.</i> 81, 2164 (1999)                                                                                                   |
| 10       | E11           | M 7277 | 555-29-3    | 211.22                | (±)-3-(3,4-dihydroxyphenyl)-2-methyl-DL-alanine     | DL-alpha-Methyl-DOPA                                                                                      | Neurotransmission | Enzyme | Inhibitor  | L-aromatic amino acid decarboxylase |                     |                    | van Zwieten, P.A., Chalmers, J.P., Different types of centrally acting antihypertensives and their targets in the central nervous system. <i>Cardiovasc. Drugs Ther.</i> 8, 787 (1994)                                                                                    |
| 10       | F02           | L-121  | 71-82-9     | 433.51                | Levallorphan tartrate                               | 17-(2-Propenyl)morphinan-3-ol tartrate                                                                    | Opioid            |        | Antagonist |                                     | Yes                 |                    | Selley, D.E., et al., mu-Opioid receptor-stimulated guanosine-5'-O-(gamma-thio)-triphosphate binding in rat thalamus and cultured cell lines: signal transduction mechanisms underlying agonist efficacy. <i>Mol. Pharmacol.</i> 51, 87-96 (1997)                         |
| 10       | F03           | M 0814 |             | 335.23                | R(-)-Me5                                            | 1-(2,6-Dimethylphenoxy)-3-methyl-2-butanamine hydrochloride                                               | Na+ Channel       |        | Antagonist |                                     | Yes                 | 22 mg/ml           | Annamaria de Luca, <i>Mol. Pharmacol.</i> 57, 268 (2000)                                                                                                                                                                                                                  |
| 10       | F04           | M 1777 | 69567-10-8  | 177.20                | N-Methyl-1-deoxyojirimycin                          | 1,5-Dideoxy-1,5-imino-1-methyl-D-sorbitol                                                                 | Biochemistry      | Enzyme | Inhibitor  | Glucosidase                         |                     |                    | Bause, E., et al., <i>FEBS Lett.</i> 206, 208 (1986)                                                                                                                                                                                                                      |
| 10       | F05           | M 2692 | 118414-82-7 | 494.08                | MK-886                                              | 3-[3-tert-Butylthio-1-(4-chlorobenzyl)-5-isopropyl-1H-indol-2-yl]-2,2-dimethylpropionic acid, sodium salt | Leukotriene       |        | Inhibitor  |                                     | Insoluble           |                    | Rouzer et al, MK886, a potent and specific leukotriene biosynthesis inhibitor blocks and reverses the membrane association of 5-lipoxygenase in ionophore-challenged leukocytes <i>J. Biol. Chem.</i> 265, 1436-1442 (1990)                                               |
| 10       | F06           | M 3262 | 6384-92-5   | 147.13                | N-Methyl-D-aspartic acid                            | NMDA                                                                                                      | Glutamate         |        | Agonist    | NMDA                                |                     |                    | Collingridge, G. L., et al., Excitatory amino acid receptors in the vertebrate central nervous system <i>Pharmacol. Rev.</i> 40, 143-210 (1989)                                                                                                                           |
| 10       | F07           | M 4008 | 480-16-0    | 302.24                | Morin                                               | 2',3',4',5',7-Pentahydroxyflavone                                                                         | Cell Stress       |        | Inhibitor  | Antioxidant                         |                     |                    | Zeng, L.H., et al., Morin hydrate protects cultured rat glomerular mesangial cells against oxyradical damage. <i>Life Sci.</i> 55, PL351-PL357 (1994)                                                                                                                     |
| 10       | F08           | M 5171 | 174063-92-4 | 265.33                | S-Methyl-L-thiocitrulline acetate                   | N5-[Imino(methylthio)methyl]-L-ornithine acetate                                                          | Nitric Oxide      | Enzyme | Inhibitor  | NOS                                 |                     |                    | Narayanan, K. and Griffith, O.W., <i>J. Med. Chem.</i> 37, 885 (1994)                                                                                                                                                                                                     |
| 10       | F09           | M 5644 | 16662-47-8  | 521.10                | (±)-Methoxyverapamil hydrochloride                  | D600; Gallopamil                                                                                          | Ca2+ Channel      |        | Antagonist | L-type                              |                     |                    | Buckler, K.J., et al., <i>J. Physiol. London, England</i> 513, 819 (1998)                                                                                                                                                                                                 |
| 10       | F10           | M 6545 | 70476-82-3  | 517.41                | Mitoxantrone                                        | 1,4-Dihydroxy-5,8-bis([2-([2-hydroxyethyl]amino)ethyl]amino)-9,10-anthracenedione                         | DNA Metabolism    |        | Inhibitor  |                                     |                     |                    | Fox, K.R., et al., DNA sequence preferences for the anti-cancer drug mitoxantrone and related anthraquinones revealed by DNase I footprinting. <i>FEBS Lett.</i> 202, 289-94 (1986)                                                                                       |
| 10       | F11           | M 7684 |             | 461.21                | MRS 2159                                            |                                                                                                           | P2 Receptor       |        | Antagonist | P2X1                                | Yes                 | >10 mg/ml          | Kim, et al., <i>Drug Dev. Res.</i> 45, 52-66 (1998)                                                                                                                                                                                                                       |
| 10       | G02           | L-122  | 159701-44-7 | 338.46                | S(-)-Lisuride                                       | S(-)-N'-((8a)-9,10-Didehydro-6-methylergolin-8-yl)-N,N-diethyl-urea                                       | Dopamine          |        | Agonist    | D2                                  |                     |                    | Ahlenius, et al., Antagonism by lisuride and 8-OH-DPAT of 5-HTP-induced prolongation of the performance of male rat sexual behavior <i>Eur. J. Pharmacol.</i> 110, 379-381 (1985)                                                                                         |
| 10       | G03           | M 1022 | 19408-84-5  | 307.44                | Dihydrocapsaicin                                    | 8-Methyl-N-vanillylonanamide                                                                              | Vanilloid         |        | Agonist    |                                     |                     |                    | Miller, M.S., et al., Dihydrocapsaicin-induced hypothermia and substance P depletion. <i>Eur. J. Pharmacol.</i> 83, 3 (1982)                                                                                                                                              |
| 10       | G04           | M 1809 | 212329-37-8 | 399.56                | MRS 1523                                            | 3-propyl-6-ethyl-5-((ethylthio)carbonyl)-2-phenyl-4-propyl-3-pyridine carboxylate                         | Adenosine         |        | Antagonist | A3                                  | Insoluble           |                    | Li, A.-H. et al., <i>J. Med. Chem.</i> 41, 3186 (1998)                                                                                                                                                                                                                    |
| 10       | G05           | M 2727 | 31828-71-4  | 215.73                | Mexiletene hydrochloride                            | 1-(2,6-Xylyloxy)-2-aminopropane                                                                           | Na+ Channel       |        | Blocker    |                                     |                     |                    | Sicouri, S., et al., Effects of sodium channel block with mexiletine to reverse action potential prolongation in vitro models of the long term QT syndrome. <i>J. Cardiovasc. Electrophysiol.</i> 8, 1280-1290 (1997)                                                     |
| 10       | G06           | M 3281 | 7361-31-1   | 245.71                | alpha-Methyl-DL-tyrosine methyl ester hydrochloride | AMPT                                                                                                      | Neurotransmission | Enzyme | Inhibitor  | Tyrosine hydroxylase                |                     |                    |                                                                                                                                                                                                                                                                           |

| Rack No. | Rack Position | CATNUM | CAS number  | Mol. Weight Structure | Name                                                              | Secondary Name                                                                                                                        | Class          | Enzyme | Action       | Selectivity        | Solubility in Water | Solubility in DMSO | Reference                                                                                                                                                                                                                                                                                              |
|----------|---------------|--------|-------------|-----------------------|-------------------------------------------------------------------|---------------------------------------------------------------------------------------------------------------------------------------|----------------|--------|--------------|--------------------|---------------------|--------------------|--------------------------------------------------------------------------------------------------------------------------------------------------------------------------------------------------------------------------------------------------------------------------------------------------------|
| 10       | G07           | M 4145 | 38304-91-5  | 209.25                | Minoxidil                                                         |                                                                                                                                       | K+ Channel     |        | Activator    | ATP sensitive      |                     |                    | Kourie, J.I., et al., Effects of ATP-sensitive potassium channel regulators on chloride channels in the sarcoplasmic reticulum vesicles from rabbit skeletal muscle. <i>J. Membr. Biol.</i> 164, 47-58 (1998)                                                                                          |
| 10       | G08           | M 5250 | 73-31-4     | 232.28                | Melatonin                                                         | N-[2-(5-Methoxyindol-3-yl)ethyl]acetamide                                                                                             | Melatonin      |        | Agonist      |                    | Yes                 | 0.1 mg/ml          | Reiter, R.J., et al., Melatonin as a pharmacological agent against neuronal loss in experimental models of Huntington's disease, Alzheimer's disease and parkinsonism <i>Ann. N.Y. Acad. Sci.</i> 690, 471-485 (1999)                                                                                  |
| 10       | G09           | M 5685 | 221225-04-3 | 276.29                | Metrazoline oxalate                                               | 1H-Imidazole, 4,5-dihydro-2-[(1E)-2-(2-methylphenyl)ethenyl]-ethanodioate                                                             | Imidazoline    |        | Ligand       |                    | Yes                 | 16 mg/ml           | Polidori, C. et al., <i>Eur. J. Pharmacol.</i> 392, 41-49 (2000)                                                                                                                                                                                                                                       |
| 10       | G10           | M 6628 | 66-83-1     | 226.71                | O-Methylserotonin hydrochloride                                   | Mexamine hydrochloride                                                                                                                | Serotonin      |        | Agonist      |                    |                     |                    | el Mansari, M., Blier, P., Functional characterization of 5-HT1D autoreceptors on the modulation of 5-HT release in guinea-pig mesencephalic raphe, hippocampus and frontal cortex. <i>Br. J. Pharmacol.</i> 118, 681 (1996)                                                                           |
| 10       | G11           | G 5793 |             | 534.06                | GR 127935 hydrochloride                                           | N-[4-Methoxy-3-(4-methyl-1-piperazinyl)phenyl]-2'-methyl-4'-(5-methyl-1,2,4-oxadiazol-3-yl)-1,1'-biphenyl-4-carboxamide hydrochloride | Serotonin      |        | Antagonist   | 5-HT1B/1D          | Yes                 | 14 mg/ml           | DeVries, P. et al., <i>Br. J. Pharmacol.</i> 118, 85-92 (1996)                                                                                                                                                                                                                                         |
| 10       | H02           | L-131  |             | 363.29                | L-745,870 hydrochloride                                           | 3-[[4-(4-Chlorophenyl)piperazin-1-yl]methyl]-1H-pyrrolo[2,3-b]pyridine hydrochloride                                                  | Dopamine       |        | Antagonist   | D4                 | Yes                 | 0.2 mg/ml          | Patel, et al., Biological profile of L-745,870 a selective antagonist with high affinity for the dopamine D4 receptor <i>J. Pharmacol. Exp. Ther.</i> 283, 636 (1997)                                                                                                                                  |
| 10       | H03           | M 1275 | 26159-34-2  | 252.25                | (-)-Naproxen sodium                                               | (S)-6-Methoxy-alpha-methyl-2-naphthaleneacetic acid sodium                                                                            | Prostaglandin  | Enzyme | Inhibitor    | COX                |                     |                    | Barnett, J., et al., <i>Biochim. Biophys. Acta</i> 1209, 130 (1994)                                                                                                                                                                                                                                    |
| 10       | H04           | M 2011 | 148-82-3    | 305.21                | Melphalan                                                         | L-Phenylalanine mustard                                                                                                               | DNA Metabolism |        | Intercalator | GCC                |                     |                    | Nawata, S., et al., Isolated lung perfusion with melphalan for the treatment of metastatic pulmonary sarcoma. <i>J. Thorac. Cardiovasc. Surg.</i> 112, 1542-1548 (1996)                                                                                                                                |
| 10       | H05           | M 2776 | 57432-61-8  | 455.52                | Methylergonovine maleate                                          | Methergine maleate                                                                                                                    | Dopamine       |        | Antagonist   |                    | Slightly Soluble    | 25 mg/ml           | Karila-Cohen, D., Influence of the endothelium, nitric oxide and serotonergic receptors on coronary vasomotor responses evoked by ergonovine in conscious dogs. <i>Br. J. Pharmacol.</i> 127, 1039 (1999)                                                                                              |
| 10       | H06           | M 3315 | 199106-13-3 | 514.49                | MJ33                                                              | 1-Hexadecyl-3-(trifluoroethyl)-sn-glycero-2-phosphomethanol lithium                                                                   | Lipid          | Enzyme | Inhibitor    | PLA2               |                     |                    | Chen, J.W., et al., <i>J. Biol. Chem.</i> 275, 28421 (2000)                                                                                                                                                                                                                                            |
| 10       | H07           | M 4251 | 1477-68-5   | 203.67                | 3-Methoxy-4-hydroxyphenethylamine hydrochloride                   | 3-Methoxytyramine hydrochloride                                                                                                       | Dopamine       |        | Metabolite   | L-DOPA             |                     |                    | Wood, P.L., Intracerebral dialysis: direct evidence for the utility of 3-MT measurements as an index of dopamine release. <i>Life Sci.</i> 41, 1 (1987)                                                                                                                                                |
| 10       | H08           | M 5379 | 15985-39-4  | 180.23                | L-Methionine sulfoximine                                          | L-S-(3-Amino-3-carboxypropyl)-S-methylsulfoximine                                                                                     | Glutamate      | Enzyme | Inhibitor    | Glutamine synthase |                     |                    | Ginefri-Gayet, M., and Gayet, J., Hypothermia induced by infusion of methionine sulfoximine into the dorsal raphe nucleus of the rat: involvement of 5-HT1A and GABA <sub>B</sub> receptor. <i>Eur. J. Pharmacol.</i> 235, 189-196 (1993)                                                              |
| 10       | H09           | M 6191 |             | 276.68                | GW9662                                                            | 2-Chloro-5-nitro-N-phenylbenzamide                                                                                                    | Transcription  |        | Inhibitor    | PPAR-gamma         | Insoluble           |                    | Lehmann, J. M. et al., An antidiabetic thiazolidinedione is a high affinity ligand for peroxisome proliferator-activated receptor gamma (PPAR gamma). <i>J. Biol. Chem.</i> 270, 12953-12956 (1995)                                                                                                    |
| 10       | H10           | M 6680 | 26046-90-2  | 218.54                | Se-(methyl)selenocysteine hydrochloride                           | Se-MSc                                                                                                                                | Cell Cycle     |        | Inhibitor    |                    |                     |                    | Spallholz, J.E., et al., Dimethylselenide and methylselenenic acid generate superoxide in an in vitro chemiluminescence assay in the presence of glutathione: implications for the anticarcinogenic activity of L-selenomethionine and L-Se-methylselenocysteine. <i>Nutr. Cancer</i> 40, 34-41 (2001) |
| 10       | H11           | D 8941 |             | 402.44                | 2,6-Difluoro-4-[2-(phenylsulfonylamino)ethylthio]phenoxyacetamide | PEPA                                                                                                                                  | Glutamate      |        | Agonist      | AMPA               |                     |                    | Sekiguchi, et al., <i>Br. J. Pharmacol.</i> , 136, 1033-1041 (2002), <i>Br. J. Pharmacol.</i> 136, (2002)                                                                                                                                                                                              |

| Rack No. | Rack Position | CATNUM | CAS number  | Mol. Weight Structure | Name                                        | Secondary Name                                                                                               | Class             | Enzyme | Action     | Selectivity           | Solubility in Water | Solubility in DMSO | Reference                                                                                                                                                                                                                                         |
|----------|---------------|--------|-------------|-----------------------|---------------------------------------------|--------------------------------------------------------------------------------------------------------------|-------------------|--------|------------|-----------------------|---------------------|--------------------|---------------------------------------------------------------------------------------------------------------------------------------------------------------------------------------------------------------------------------------------------|
| 11       | A02           | M 8046 | 84371-65-3  | 429.61                | Mifepristone                                | RU-486                                                                                                       | Hormone           |        | Antagonist | Progesterone          |                     |                    | Lecreux, V., et al., The antiprogesterin drug RU 486 potentiates doxorubicin cytotoxicity in multidrug resistant cells through inhibition of P-glycoprotein function. FEBS Lett. 355, 187-194 (1994)                                              |
| 11       | A03           | M 9511 | 13614-98-7  | 492.96                | Minocycline hydrochloride                   |                                                                                                              | Cell Cycle        | Enzyme | Inhibitor  |                       |                     |                    | Tamargo, R., et al., Cancer Res. 51, 672 (1991)                                                                                                                                                                                                   |
| 11       | A04           | M-108  | 77086-19-2  | 337.38                | (-)-MK-801 hydrogen maleate                 | (5S,10R)-(-)-5-Methyl-10,11-dihydro-5H-dibenzo[a,d]cyclohepten-5,10-imine                                    | Glutamate         |        | Antagonist | NMDA                  |                     |                    | Wong, E.H.F., et al., The anticonvulsant MK-801 is a potent NMDA antagonist Proc. Natl. Acad. Sci. USA 83, 7104-7108 (1986)                                                                                                                       |
| 11       | A05           | M-149  | 20229-30-5  | 452.66                | Methiothepin mesylate                       | 1-[10,11-Dihydro-8-(methylthio)dibenzo[b,f]thiepin-10-yl]-4-methylpiperazine mesylate                        | Serotonin         |        | Antagonist | 5-HT1E, 5-HT1F, 5-HT6 | Yes                 | 13 mg/ml           | Schoeffler, P., et al., Functional endogenously expressed 5-hydroxytryptamine 5-HT7 receptors in human vascular smooth muscle cells Br. J. Pharmacol. 117, 993-994 (1996)                                                                         |
| 11       | A06           | M-216  |             | 376.20                | MDL 105,519                                 | (Z)-2-Carboxy-4,6-dichloroindole-3-(2'-phenyl-2'-carboxy)-ene                                                | Glutamate         |        | Antagonist | NMDA-Glycine          | Insoluble           |                    | Baron, et al., Pharmacological characterization of MDL-105,519 an NMDA receptor glycine site antagonist. Eur. J. Pharmacol. 323, 181-192 (1997)                                                                                                   |
| 11       | A07           | N 1771 | 105618-26-6 | 734.73                | nor-Binaltorphimine dihydrochloride         | nor-BNI dihydrochloride                                                                                      | Opioid            |        | Antagonist | kappa                 |                     |                    | Wettstein, J.G. and Grouhel, A., Pharmacol. Biochem. Behav. 53, 411 (1995)                                                                                                                                                                        |
| 11       | A08           | N 4034 | 99389-57-8  | 234.62                | NCS-356                                     | 4-(4-chlorophenyl)-4-hydroxy-2-butanolic acid                                                                | GABA              |        | Agonist    | gamma-Hydroxybutyrate | Yes                 | 18 mg/ml           | Maitre, M., Prog. Neurobiol. 51, 337 (1997)                                                                                                                                                                                                       |
| 11       | A09           | N 5260 | 65-31-6     | 462.41                | (-)-Nicotine hydrogen tartrate salt         | (-)-1-Methyl-2-(3-pyridyl)pyrrolidine                                                                        | Cholinergic       |        | Agonist    | Nicotinic             | Yes                 | 50 mg/ml           | Brioni, J.D., et al., The pharmacology of (-)-nicotine and novel cholinergic channel modulators. Adv. Pharmacol. 37, 153-214 (1997)                                                                                                               |
| 11       | A10           | N 7510 | 54527-84-3  | 516.00                | Nicardipine hydrochloride                   | YC-93 hydrochloride                                                                                          | Ca2+ Channel      |        | Antagonist | L-type                | Insoluble           |                    | Matsuda, T. and Kurata, Y., Effects of nicardipine and bupivacaine on early after depolarization in rabbit sinoatrial node cells: a possible mechanism of bupivacaine-induced arrhythmias. Gen. Pharmacol. 33, 115-125 (1999)                     |
| 11       | A11           | N 8652 | 104869-31-0 | 1162.89               | NF 023                                      | 8,8'-[carbonylbis(imino-3,1-phenylene carbonylimino)]bis(1,3,5-naphthalene-trisulfonic acid) hexasodium salt | P2 Receptor       |        | Antagonist | P2X1                  | Yes                 |                    | Soto, F. et al., Neuropharmacology 38, 141 (1999)                                                                                                                                                                                                 |
| 11       | B02           | M 8131 | 672-87-7    | 195.22                | L-alpha-Methyl-p-tyrosine                   | (S)-alpha-Methyltyrosine                                                                                     | Neurotransmission | Enzyme | Inhibitor  | Tyrosine hydroxylase  |                     |                    | Ross S.B., et al., Naunyn Schmiedebergs Arch Pharmacol. 1988 May;337(5):512-8                                                                                                                                                                     |
| 11       | B03           | M 9651 | 10347-81-6  | 313.87                | Maprotiline hydrochloride                   | 9-(gamma-Methylaminopropyl)-9,10-dihydro-9,10-ethanoanthracene hydrochloride                                 | Adrenoceptor      |        | Inhibitor  | Reuptake              | Yes                 | 50 mg/ml           | Hosli, E., and Hosli, L., Autoradiographic studies on the uptake of 3H-noradrenaline and 3H-serotonin by neurones and astrocytes in explant and primary cultures of rat CNS: effects of antidepressants Int. J. Dev. Neurosci. 13, 897-908 (1995) |
| 11       | B04           | M-109  | 78263-90-8  | 306.32                | 2-Methyl-5-hydroxytryptamine maleate        | 2-Methylserotonin maleate                                                                                    | Serotonin         |        | Agonist    | 5-HT3                 | Yes                 | 4.5 mg/ml          | Ismail, A.M., 5-HT1 and 5-HT2 binding profiles of the serotonergic agents alpha-methylserotonin and 2-methylserotonin. J. Med. Chem. 33, 755 (1990)                                                                                               |
| 11       | B05           | M-152  | 34983-48-7  | 539.24                | 2-Methylthioadenosine diphosphate trisodium | 2-(Methylthio)-adenosine 5'-trihydrogen diphosphate trisodium                                                | P2 Receptor       |        | Agonist    | P2Y                   | Yes                 | 35 mg/ml           | Satchell, et al., Inhibitory effects of adenine nucleotide analogs of the isolated guinea-pig taenia coli J. Pharmacol. Exp. Ther. 195, 540-548 (1975)                                                                                            |
| 11       | B06           | M-225  |             | 371.40                | Metrifudil                                  | N-[(2-Methylphenyl)methyl]-adenosine                                                                         | Adenosine         |        | Agonist    | A2                    | Yes                 | 0.3 mg/ml          | Klitgaard, Contrasting effects of adenosine A1 and A2 receptor ligands in different chemoconvulsive rodent models. Eur. J. Pharmacol. 242, 221 (1993)                                                                                             |
| 11       | B07           | N 2001 | 114-80-7    | 303.20                | Neostigmine bromide                         |                                                                                                              | Cholinergic       | Enzyme | Inhibitor  | Acetylcholinesterase  | Yes                 | 1.0 mg/ml          | Weinstock, M., et al., Antagonism of the cardiovascular and respiratory depressant effects of morphine in the conscious rabbit by physostigmine. J. Pharmacol. Exp. Ther. 218, 504-508 (1981)                                                     |
| 11       | B08           | N 4148 | 57564-91-7  | 336.33                | S-Nitrosoglutathione                        | GSNO                                                                                                         | Nitric Oxide      |        | Donor      |                       |                     |                    | Jansen, A., et al., The relaxant properties in guinea pig airways of S-nitrosothiols. J. Pharmacol. Exp. Ther. 261, 154-160 (1992)                                                                                                                |
| 11       | B09           | N 5501 | 2149-70-4   | 219.20                | NG-Nitro-L-arginine                         | L-NOARG; L-NNA                                                                                               | Nitric Oxide      | Enzyme | Inhibitor  | NOS                   |                     |                    | Mayer R.D., J Pharmacol Exp Ther. 2003 Jul;306(1):43-50. Epub 2003 Apr 03                                                                                                                                                                         |
| 11       | B10           | N 7634 | 21829-25-4  | 346.34                | Nifedipine                                  |                                                                                                              | Ca2+ Channel      |        | Antagonist | L-type                |                     |                    | Segawa, D., et al., Cardiac inotropic vs. chronotropic selectivity of isradipine, nifedipine, and clevidipine, a new ultrashort-acting dihydropyridine. Eur. J. Pharmacol. 380, 123-128 (1999)                                                    |

| Rack No. | Rack Position | CATNUM | CAS number  | Mol. Weight Structure | Name                                     | Secondary Name                                                                                   | Class           | Enzyme | Action       | Selectivity           | Solubility in Water | Solubility in DMSO | Reference                                                                                                                                                                                                                         |
|----------|---------------|--------|-------------|-----------------------|------------------------------------------|--------------------------------------------------------------------------------------------------|-----------------|--------|--------------|-----------------------|---------------------|--------------------|-----------------------------------------------------------------------------------------------------------------------------------------------------------------------------------------------------------------------------------|
| 11       | B11           | N 8659 | 52208-23-8  | 272.70                | Nimustine hydrochloride                  | ACNU                                                                                             | DNA             |        | Intercalator |                       |                     |                    | Shiraishi, A., et al. Increased susceptibility to chemotherapeutic alkylating agents of mice deficient in DNA repair methyltransferase. <i>Carcinogenesis</i> 21, 1879 (2000)                                                     |
| 11       | C02           | S 1068 | 162100-15-4 | 337.81                | SB-215505                                | 6-Chloro-5-methyl-1-5-quinolylcarbonyl-indoline                                                  | Serotonin       |        | Antagonist   | 5-HT2B                | Insoluble           | 11 mg/ml @ 60°C    | Reavill, C. et al., <i>Br. J. Pharmacol.</i> 126, 572-574 (1999)                                                                                                                                                                  |
| 11       | C03           | M 9656 | 113276-94-1 | 338.26                | H-8 dihydrochloride                      | N-[2-(Methylamino)ethyl]-5-isoquinolinesulfonamide dihydrochloride                               | Phosphorylation | Enzyme | Inhibitor    | PKA, PKG              |                     |                    | Hidaka, H., et al., <i>Biochemistry</i> 23, 5036 (1984)                                                                                                                                                                           |
| 11       | C04           | M-110  | 304-52-9    | 306.32                | alpha-Methyl-5-hydroxytryptamine maleate | alpha-Methylserotonin maleate                                                                    | Serotonin       |        | Agonist      | 5-HT2                 | Yes                 | 8.0 mg/ml          | Ismaiel, A.M., et al., 5-HT1 and 5-HT2 binding profiles of the serotonergic agents alpha-methylserotonin and 2-methylserotonin. <i>J. Med. Chem.</i> 33, 755-758 (1990)                                                           |
| 11       | C05           | M-153  |             | 397.97                | Mesulergine hydrochloride                | CU 32-085 hydrochloride                                                                          | Dopamine        |        | Agonist      |                       | Yes                 | 4.0 mg/ml          | Enz, A., Biphasic influence of a 8-a-amino-ergoline, CU 32-085, on striatal dopamine synthesis and turnover in vivo in the rat. <i>Life Sci.</i> 29, 2227 (1981)                                                                  |
| 11       | C06           | M-226  |             | 507.44                | p-MPPF dihydrochloride                   | 4-Fluoro-N-(2-[4-(2-methoxyphenyl)-1-piperazinyl]ethyl)-N-(2-pyridinyl)benzamide dihydrochloride | Serotonin       |        | Antagonist   | 5-HT1A                | Yes                 | 19 mg/ml           | Thielen, R.J., Frazer, A., Effects of novel 5-HT1A receptor antagonists on measures of post-synaptic 5-HT1A receptor activation in vivo. <i>Life Sci.</i> 56, 0 (1995)                                                            |
| 11       | C07           | N 2034 |             | 256.35                | CR 2249                                  | Nebostinel                                                                                       | Glutamate       |        | Agonist      | NMDA-Glycine          |                     |                    | Lanza, M., et al., Characterization of a novel putative cognition enhancer mediating facilitation of glycine effect on strychnine-resistant sites coupled to NMDA receptor complex. <i>Neuropharmacology</i> 36, 1057-1064 (1997) |
| 11       | C08           | N 4159 | 131733-92-1 | 242.25                | NCS-382                                  | 1-Ethyl-1,4-dihydro-7-methyl-4-oxo-1,8-naphthyridine-3-carboxylic acid                           | GABA            |        | Antagonist   | gamma-Hydroxybutyrate | Yes                 | 22 mg/ml           | Maitre, M., <i>J. Pharmacol. Exp. Ther.</i> 255, 657 (1990)                                                                                                                                                                       |
| 11       | C09           | N 5504 | 550-99-2    | 246.74                | Naphazoline hydrochloride                | 2-(1-Naphthylmethyl)imidazoline nitrate                                                          | Adrenoceptor    |        | Agonist      | alpha                 |                     |                    | Regunathan, S., et al., Imidazole receptors and agmatine in blood vessels: a novel system inhibiting vascular smooth muscle proliferation. <i>J. Pharmacol. Exp. Ther.</i> 276, 1272-1282 (1996)                                  |
| 11       | C10           | N 7758 | 51481-60-8  | 363.84                | Naloxone hydrochloride                   |                                                                                                  | Opioid          |        | Antagonist   |                       | Yes                 | 50 mg/ml           | Mitsushima, D., et al., Fos expression in gonadotropin-releasing hormone neurons by naloxone or bicuculline in intact male rats. <i>Brain Res.</i> 839, 209-212 (1999)                                                            |
| 11       | C11           | N 8784 | 29745-04-8  | 168.15                | Norcantaridin                            |                                                                                                  | Phosphorylation | Enzyme | Inhibitor    | PP2A                  |                     |                    | Hong, C. Y., et al., Norcantharidin-induced post-G(2)/M apoptosis is dependent on wild-type p53 gene. <i>Biochem. Biophys. Res. Comm.</i> 276, 278 (2000)                                                                         |
| 11       | D02           | M 8878 | 616-47-7    | 82.11                 | 1-Methylimidazole                        | Methimazole                                                                                      | Prostaglandin   | Enzyme | Inhibitor    | COX                   |                     |                    | Shao W., et al., <i>Biochem Biophys Acta.</i> 1995 Apr 27;1248(2):177-85                                                                                                                                                          |
| 11       | D03           | M-001  |             | 334.42                | Proglumide                               | 4-Benzoylamino-5-dipropylamino-5-oxopentanoic acid                                               | Cholecystokinin |        | Antagonist   |                       |                     |                    |                                                                                                                                                                                                                                   |
| 11       | D04           | M-116  | 17560-51-9  | 365.84                | Metolazone                               |                                                                                                  | Ion Pump        |        | Inhibitor    | Na+/Cl- transporter   |                     |                    | Chan P., et al., <i>J Clin Pharmacol.</i> 1997 Mar;37(3):253-7                                                                                                                                                                    |
| 11       | D05           | M-166  |             | 280.67                | MDL 26,630 trihydrochloride              | 1,5-(Diethylamino)piperidine trihydrochloride                                                    | Glutamate       |        | Agonist      | NMDA-Polyamine        |                     |                    | Reynolds, et al., 1,5-(Diethylamino)piperidine, a novel spermidine analogue that more specifically activates the N-methyl-D-aspartate receptor-associated polyamine site. <i>Mol. Pharmacol.</i> 41, 989 (1992)                   |
| 11       | D06           | M-231  |             | 391.90                | (-)-3-Methoxynaltrexone hydrochloride    |                                                                                                  | Opioid          |        | Antagonist   |                       | Yes                 | 22 mg/ml           | Brown, et al., 3-Methoxynaltrexone selective heroin/morphine-6b-glucuronide antagonist. <i>FEBS Lett.</i> 412, 35-38 (1997)                                                                                                       |
| 11       | D07           | N 2255 | 38048-32-7  | 419.42                | S-(4-Nitrobenzyl)-6-thioinosine          | NBTI                                                                                             | Adenosine       |        | Inhibitor    | Uptake                | Insoluble           |                    | Tandon, et al., <i>J. Neurochem.</i> 60, 2124 (1993)                                                                                                                                                                              |
| 11       | D08           | N 4382 | 337405-8    | 254.22                | Nalidixic acid sodium                    | 1-Ethyl-1,4-dihydro-7-methyl-4-oxo-1,8-naphthyridine-3-carboxylic acid sodium                    | Antibiotic      | Enzyme | Inhibitor    | DNA Gyrase            |                     |                    | Aoyama, H., Avian myeloblastosis virus reverse transcriptase inhibition by nalidixic acid. <i>Mol. Cell Biochem.</i> 108, 169-174 (1991)                                                                                          |
| 11       | D09           | N 5636 | 504-88-1    | 119.08                | 3-Nitropropionic acid                    |                                                                                                  | Cell Stress     |        | Toxin        |                       |                     |                    | Schulz, J.B., et al., The role of mitochondrial dysfunction and neuronal nitric oxide in animal models of neurodegenerative diseases. <i>Mol. Cell Biochem.</i> 174, 193-197 (1997)                                               |

| Rack No. | Rack Position | CATNUM | CAS number  | Mol. Weight Structure | Name                                           | Secondary Name                                                                      | Class             | Enzyme | Action     | Selectivity                       | Solubility in Water | Solubility in DMSO | Reference                                                                                                                                                                                                               |
|----------|---------------|--------|-------------|-----------------------|------------------------------------------------|-------------------------------------------------------------------------------------|-------------------|--------|------------|-----------------------------------|---------------------|--------------------|-------------------------------------------------------------------------------------------------------------------------------------------------------------------------------------------------------------------------|
| 11       | D10           | N 7778 | 2942-42-9   | 163.14                | 7-Nitroindazole                                |                                                                                     | Nitric Oxide      | Enzyme | Inhibitor  | nNOS                              |                     |                    | Garthwaite, J., Glutamate, nitric oxide and cell-cell signalling in the nervous system. Trends Neurosci. 14, 60-67 (1991)                                                                                               |
| 11       | D11           | N 9007 | 912-60-7    | 449.89                | Noscapine hydrochloride                        | Narcotine                                                                           | Opioid            |        | Ligand     |                                   |                     |                    | Mahmoudian M, et al., Eur J Clin Pharmacol. 2003 Nov;59(8-9):597-81. Epub 2003 Sep 27                                                                                                                                   |
| 11       | E02           | M 9020 | 826-39-1    | 203.76                | Mecamylamine hydrochloride                     |                                                                                     | Cholinergic       |        | Antagonist | Nicotinic                         | Yes                 | 47 mg/ml           | Castillo, P.E., et al., Multiple and opposing roles of cholinergic transmission in the main olfactory bulb. J. Neurosci. 19, 9180-9191 (1999)                                                                           |
| 11       | E03           | M-003  | 14611-52-0  | 223.75                | R-(-)-Deprenyl hydrochloride                   | Selegiline                                                                          | Neurotransmission | Enzyme | Inhibitor  | MAO-B                             | Yes                 |                    | Heikkila, R.E., et al., Protection against the dopaminergic neurotoxicity of MPTP by monoamine oxidase inhibitors. Nature 311, 467-469 (1984)                                                                           |
| 11       | E04           | M-120  | 96316-00-6  | 396.57                | Metaphit methanesulfonate                      | 1-(1-[3-Isothiocyanato]phenyl)cyclohexylpiperidine methanesulfonate                 | Opioid            |        | Antagonist | sigma                             | Yes                 |                    | French, E.D., et al., Metaphit, a proposed phencyclidine (PCP) antagonist prevents PCP-induced locomotor behavior through mechanisms unrelated to specific blockade of PCP receptors Eur. J. Pharmacol. 140, 267 (1987) |
| 11       | E05           | Z 4626 |             | 367.92                | ZM 39923 hydrochloride                         | 3-(N-Benzyl-N-isopropyl)amino-1-(naphthalen-2-yl)propan-1-one hydrochloride         | Phosphorylation   | Enzyme | Inhibitor  | JNK-3                             |                     |                    | Roth, H., Research into the photochemical synthesis of ephedrine-like compounds; I. Photopinacolicolization of 3-aminopropiophenones. Arch. Pharm. (Weinheim) 309, 2-11 (1976)                                          |
| 11       | E06           | N 0630 | 4394-00-7   | 282.22                | Niflumic acid                                  | 2-(3-[Trifluoromethyl]anilino)nicotinic acid                                        | Prostaglandin     | Enzyme | Inhibitor  | COX-2                             |                     |                    | Barnett, J., et al., Biochim. Biophys. Acta 1209, 130 (1994)                                                                                                                                                            |
| 11       | E07           | N 3136 | 16676-29-2  | 377.87                | Naltrexone hydrochloride                       | 17-(Cyclopropylmethyl)-4,5-epoxy-3,14-dihydroxymorphinan-6-one hydrochloride        | Opioid            |        | Antagonist |                                   |                     |                    | Powell, K.R. and Holtzman, S.G., Differential antagonism of the rate-decreasing effects of opiate receptor agonists by naltrexone and norbinaltorphimin. Eur. J. Pharmacol. 377, 21-28 (1999)                           |
| 11       | E08           | N 4396 | 59052-16-3  | 393.91                | Nalbuphine hydrochloride                       |                                                                                     | Opioid            |        | Antagonist |                                   | Yes                 |                    | Gerak, L.R. and France, C.P., Discriminative stimulus effects of nalbuphine in rhesus monkeys. J. Pharmacol. Exp. Ther. 276, 523-531 (1996)                                                                             |
| 11       | E09           | N 5751 | 51298-62-5  | 269.69                | NG-Nitro-L-arginine methyl ester hydrochloride | L-NAME hydrochloride                                                                | Nitric Oxide      | Enzyme | Inhibitor  | NOS                               | Yes                 | 50 mg/ml           | Rees, D.D., et al., Characterization of three inhibitors of endothelial nitric oxide synthase in vitro and in vivo. Br. J. Pharmacol. 101, 746-752 (1990)                                                               |
| 11       | E10           | N 7904 |             | 363.42                | NS 521 oxalate                                 | 1-(1-Butyl)-4-(2-oxo-1-benzimidazolyl)piperidine oxalate                            | Glutamate         |        | Modulator  | Benzimidazolone                   | Yes                 | 10 mg/ml           | Gronborg, M., et al., J. Pharmacol. Exp. Ther. 290, 348 (1999)                                                                                                                                                          |
| 11       | E11           | N 9765 | 68935-273   | 548.60                | (+)-Nicotine (+)-di-p-toluoyl tartrate         | R(+)-3-(1-Methyl-2-pyrrolidinyl)pyridinium (+)-di-p-toluoyl tartrate                | Cholinergic       |        | Agonist    | Nicotinic                         | Yes                 |                    |                                                                                                                                                                                                                         |
| 11       | F02           | M 9125 | 135-23-9    | 297.85                | Methapyrilene hydrochloride                    | N,N-Dimethyl-N'-(2-pyridinyl)-N''-(2-thienylmethyl)-1,2-ethanediamine hydrochloride | Histamine         |        | Antagonist | H1                                |                     |                    | Noguchi, S., et al., The suppression of olfactory bulbectomy-induced muricide by antidepressants and antihistamines via histamine H1 receptor blocking. Physiol. Behav. 51, 1123-1127 (1992)                            |
| 11       | F03           | M-104  | 2936-25-6   | 209.72                | (±)-Muscarine chloride                         | Tetrahydro-4-hydroxy-N,N,5-tetramethyl-2-furanmethan ammonium chloride              | Cholinergic       |        | Agonist    | Muscarinic                        |                     |                    | Barabara, J. G., Pre- and post-synaptic muscarinic receptors in thin slices of rat adrenal gland. Eur. J. Neurosci. 10, 3535 (1998)                                                                                     |
| 11       | F04           | M-129  | 555-30-6    | 211.22                | L-alpha-Methyl DOPA                            | MK-351; Methyl dopa                                                                 | Biochemistry      | Enzyme | Inhibitor  | Aromatic amino acid decarboxylase | Yes                 |                    | A. Scriabine, ed., Pharmacology of Antihypertensive Drugs, New York, NY, USA (1980), 54                                                                                                                                 |
| 11       | F05           | M-184  | 33876-97-0  | 206.63                | 3-Morpholinosydnonimine hydrochloride          | Linsidomine hydrochloride                                                           | Nitric Oxide      |        | Donor      |                                   | Yes                 | >10 mg/ml          | Arvola, et al., L-cysteine augments the vasorelaxation induced by sodium nitrite and SIN-1 but not that due to acetylcholine Eur. J. Pharmacol. 214, 289-292 (1992)                                                     |
| 11       | F06           | N 1016 | 51803-78-2  | 308.31                | Nimesulide                                     | N-(4-Nitro-2-phenoxyphenyl)methanesulfonamide                                       | Prostaglandin     | Enzyme | Inhibitor  | COX-2                             |                     |                    | Bjarnason, Forthcoming non-steroidal anti-inflammatory drugs: are they really devoid of side effects. Ital. J. Gastroenterol Hepatol. 31, S27-S36 (1999)                                                                |
| 11       | F07           | N 3398 | 79032-48-7  | 220.25                | S-Nitroso-N-acetylpenicillamine                | SNAP                                                                                | Nitric Oxide      |        | Donor      |                                   |                     |                    | Shaffer, J.E., et al., Lack of tolerance to a 24-hour infusion of S-nitroso N-acetylpenicillamine (SNAP) in conscious rabbits. J. Pharmacol. Exp. Ther. 260, 286-293 (1992)                                             |
| 11       | F08           | N 4779 | 107254-86-4 | 300.32                | 5-Nitro-2-(3-phenylpropylamino)benzoic acid    | NPPB                                                                                | Cl- Channel       |        | Blocker    |                                   | Insoluble           |                    | Kirkup, A.J., et al., Br. J. Pharmacol. 117, 175 (1996)                                                                                                                                                                 |

| Rack No. | Rack Position | CATNUM | CAS number  | Mol. Weight Structure | Name                                                 | Secondary Name                                                                                             | Class             | Enzyme | Action     | Selectivity               | Solubility in Water | Solubility in DMSO | Reference                                                                                                                                                                                                            |
|----------|---------------|--------|-------------|-----------------------|------------------------------------------------------|------------------------------------------------------------------------------------------------------------|-------------------|--------|------------|---------------------------|---------------------|--------------------|----------------------------------------------------------------------------------------------------------------------------------------------------------------------------------------------------------------------|
| 11       | F09           | N 7127 | 1011-74-1   | 219.67                | (±)-Normetanephrine hydrochloride                    | alpha-(Aminomethyl)-4-hydroxy-3-methoxy-benzyl alcohol hydrochloride                                       | Adrenoceptor      |        | Metabolite | Norepinephrine            | Yes                 | 50 mg/ml           | Eisenhofer, G. Plasma normetanephrine for examination of extraneuronal uptake and metabolism of noradrenaline in rats Naunyn-Schmiedeberg's Arch. Pharmacol. 349, 259-269 (1994)                                     |
| 11       | F10           | N 7906 |             | 369.25                | 2-(alpha-Naphthoyl)ethyltrimethylammonium iodide     | alpha-NETA                                                                                                 | Cholinergic       | Enzyme | Inhibitor  | Choline Acetyltransferase |                     |                    | Sastry, B.V., et al., J. Pharmacol. Exp. Ther. 245, 72 (1988)                                                                                                                                                        |
| 11       | F11           | N-115  | 111469-81-9 | 450.97                | Naltrindole hydrochloride                            | NTI hydrochloride                                                                                          | Opioid            |        | Antagonist | delta                     | Yes                 | 8.0 mg/ml          | Portoghese, P.S., et al., Naltrindole: a highly selective and potent non-peptidic-opioid receptor antagonist. Eur. J. Pharmacol. 146, 185-186 (1988)                                                                 |
| 11       | G02           | M 9292 | 41100-52-1  | 215.77                | Memantine hydrochloride                              | 3,5-Dimethyl-1-adamantanamine hydrochloride                                                                | Glutamate         |        | Antagonist | NMDA                      |                     |                    | Weller, et al., NMDA receptor-mediated glutamate toxicity of cultured cerebellar, cortical and mesencephalic neurons: Neuroprotective properties of amantadine and memantine Brain Res. 613, 143 (1993)              |
| 11       | G03           | M-105  | 104807-401  | 728.77                | Methoctramine tetrahydrochloride                     | N,N'-bis[6-[[[2-Methoxyphenyl)methyl]amino]hexyl]1,8-octane diamine tetrahydrochloride                     | Cholinergic       |        | Antagonist | M2                        | Yes                 | 30 mg/ml           | Wess, J. et al., Methoctramine selectively blocks cardiac muscarinic M2 receptors in vivo. Naunyn-Schmiedeberg's Arch. Pharmacol. 338, 246-249 (1988)                                                                |
| 11       | G04           | M-137  | 129-49-7    | 469.54                | Methysergide maleate                                 |                                                                                                            | Serotonin         |        | Antagonist |                           | Yes                 | 2.0 mg/ml          | Mylecharane, E.J., The classification of 5-hydroxytryptamine receptors. Clin. Exp. Pharmacol. Physiol. 16, 517-522 (1989)                                                                                            |
| 11       | G05           | M-187  | 36397-14-5  | 293.84                | 3-Methoxy-morphinan hydrochloride                    | nor-Dextromethorphan hydrochloride                                                                         | Glutamate         |        | Antagonist |                           |                     |                    |                                                                                                                                                                                                                      |
| 11       | G06           | N 1392 | 51-12-7     | 298.35                | Nialamide                                            | 4-Pyridinecarboxylic acid 2-[3-oxo-3-[[phenylmethyl]amino]propyl]hydrazide                                 | Neurotransmission | Enzyme | Inhibitor  | MAO                       |                     |                    | Liu J.P., et al., Brain Res Dev Brain Res. 1991 oct 21;62(2):297-305                                                                                                                                                 |
| 11       | G07           | N 3510 | 50-65-7     | 327.13                | Nicosamide                                           | 2',5'-Dichloro-4-nitrosalicylanilide                                                                       | Antibiotic        |        |            | Protonophore              |                     |                    | van Tonder E.C., et al., Int J Pharm. 2004 Jan 28;269(2):417-32                                                                                                                                                      |
| 11       | G08           | N 4784 |             | 1505.10               | NF449 octasodium salt                                | 4,4',4''-[Carbonyl-bis[imino-5,1,3-benzenetriyl bis-(carbonylimino)]tetrakis(benzene-1,3-disulfonic acid)] | G protein         | Enzyme | Antagonist | Gs-alpha                  | Yes                 |                    | Hohenegger, M., Gs alpha-selective G protein antagonists. Proc. Natl. Acad. Sci. USA 95, 346 (1998)                                                                                                                  |
| 11       | G09           | N 7261 | 894-71-3    | 299.85                | Nortriptyline hydrochloride                          |                                                                                                            | Adrenoceptor      |        | Inhibitor  | Uptake                    | Yes                 |                    | Nakashita, M., et al., Effects of tricyclic and tetracyclic antidepressants on the three subtypes of GABA transporter. J. Neurosci. Res. 29, 87-91 (1997)                                                            |
| 11       | G10           | N 8403 | 130506-22-8 | 175.15                | 6-Nitroso-1,2-benzopyrone                            |                                                                                                            | Transcription     | Enzyme | Inhibitor  | PARP                      |                     |                    | Buki, K.G., et al., FEBS Lett. 290, 181 (1991)                                                                                                                                                                       |
| 11       | G11           | N-140  | 135261-88-0 | 593.17                | N-(p-Isothiocyanatophenethyl)spiperone hydrochloride | NIPS hydrochloride                                                                                         | Dopamine          |        | Antagonist | D2                        |                     |                    | Xu, et al., N-(p-Isothiocyanatophenethyl)spiperone selective and irreversible antagonist of D2 dopamine receptors in brain J. Pharmacol. Exp. Ther. 257, 608-615 (1991)                                              |
| 11       | H02           | M 9440 |             | 168.15                | Me-3,4-dephostatin                                   | 3,4-Dihydroxy-N-methyl-N-nitrosaline                                                                       | Phosphorylation   | Enzyme | Inhibitor  | PP1B / SHPTP-1            | Yes                 |                    | Suzuki, T., et al., Potentiation of insulin-related signal transduction by a novel protein-tyrosine phosphatase inhibitor, Et-3,4-dephostatin, on cultured 3T3-L1 adipocytes. J. Biol. Chem. 276, 27511-26518 (2001) |
| 11       | H03           | M-107  | 77086-22-7  | 337.38                | (+)-MK-801 hydrogen maleate                          | Dizocilpine maleate                                                                                        | Glutamate         |        | Antagonist | NMDA                      | Yes                 | 6.0 mg/ml          | Wong, E.H.F., et al., The anticonvulsant MK-801 is a potent NMDA antagonist. Proc. Natl. Acad. Sci. USA 83, 7104-7108 (1986)                                                                                         |
| 11       | H04           | M-140  | 14721-76-7  | 196.68                | Methylcarbamylcholine chloride                       | Methylcarbachol chloride                                                                                   | Cholinergic       |        | Agonist    | Nicotinic                 | Yes                 |                    | Araujo, D.M., et al., Characterization of N-[3H]methylcarbamylcholine binding sites and effect of N-methylcarbamylcholine on acetylcholine release in rat brain. J. Neurochem. 51, 292-299 (1988)                    |
| 11       | H05           | M-204  | 155204-23-2 | 578.88                | p-MPPI hydrochloride                                 | 4-Iodo-N-[2-(4-(methoxyphenyl)-1-piperazinyl)ethyl]-N-2-pyridinyl-benzamide hydrochloride                  | Serotonin         |        | Antagonist | 5-HT1A                    | Yes                 | 2.4 mg/ml          | Kung, et al., In vivo binding of [125I]4-(methoxyphenyl)-1-[2-(N-2"-pyridinyl)-p-iodo-benzamido]-ethylpiperazine, p-MPPI, to 5HT1A receptors in rat brain. Synapse 18, 459 (1994)                                    |
| 11       | H06           | N 1530 | 32795-47-4  | 354.41                | Nomifensine maleate                                  | 1,2,3,4-Tetrahydro-2-methyl-4-phenyl-8-isoquinolinamine maleate                                            | Dopamine          |        | Inhibitor  | Reuptake                  |                     |                    | Wieczorek, W.J., et al., Brain Res. 657, 42 (1994)                                                                                                                                                                   |

| Rack No. | Rack Position | CATNUM | CAS number  | Mol. Weight Structure | Name                                                             | Secondary Name                                                                                                         | Class           | Enzyme | Action     | Selectivity    | Solubility in Water | Solubility in DMSO | Reference                                                                                                                                                                                                    |
|----------|---------------|--------|-------------|-----------------------|------------------------------------------------------------------|------------------------------------------------------------------------------------------------------------------------|-----------------|--------|------------|----------------|---------------------|--------------------|--------------------------------------------------------------------------------------------------------------------------------------------------------------------------------------------------------------|
| 11       | H07           | N 3529 | 115338-32-4 | 474.40                | NAN-190 hydrobromide                                             | 1-(2-Methoxyphenyl)-4-[4-(2-phthalimido)butyl]piperazine hydrobromide                                                  | Serotonin       |        | Antagonist | 5-HT1A         |                     |                    | Rydelek-Fitzgerald, L., et al., NAN-190: agonist and antagonist interactions with brain 5-HT1A receptors. Brain Res. 532, 191-196 (1990)                                                                     |
| 11       | H08           | N 5023 | 500-38-9    | 302.37                | Nordihydroguaiaretic acid from Larrea divaricata (creosote bush) | NDGA                                                                                                                   | Leukotriene     | Enzyme | Inhibitor  | Lipoxygenase   |                     |                    | Nakayama, et al., Suppression of hydroperoxide-induced cytotoxicity by polyphenols. Cancer Res. 54, 1991s-1993s (1994)                                                                                       |
| 11       | H09           | N 7505 | 2646-71-1   | 833.36                | NADPH tetrasodium                                                | Reduced nicotinamide adenosine dinucleotide phosphate tetrasodium                                                      | Nitric Oxide    | Enzyme | Cofactor   |                |                     |                    |                                                                                                                                                                                                              |
| 11       | H10           | N 8534 | 63612-50-0  | 317.23                | Nilutamide                                                       | Anandron                                                                                                               | Hormone         |        | Inhibitor  | Androgen       |                     |                    | Dole, E. J., Holdsworth, M. T., Nilutamide: an antiandrogen for the treatment of prostate cancer. Pharmacotherapy 31, 65 (1997)                                                                              |
| 11       | H11           | N-142  | 145645-62-1 | 386.88                | NO-711 hydrochloride                                             | 1-(2-(((Diphenylmethylene)imino)oxy)ethyl)-1,2,5,6-tetrahydro-3-pyridine-carboxylic acid hydrochloride                 | GABA            |        | Inhibitor  | Uptake         | Yes                 | 20 mg/ml           | Nielsen, et al., Characterization of tiagabine (NO-328) a new potent and selective GABA uptake inhibitor. Eur. J. Pharmacol. 196, 257 (1991)                                                                 |
| 12       | A02           | N-144  | 39562-70-4  | 360.37                | Nitrendipine                                                     | 1,4-Dihydro-2,6-dimethyl-4-(3-nitrophenyl)-3,5-pyridinecarboxylic acid ethyl methyl ester                              | Ca2+ Channel    |        | Antagonist | L-type         | Yes                 |                    | Chen, X., et al., Quantitative determination of nitrendipine and its metabolite dehydronitrendipine in human plasma using liquid chromatography-tandem mass spectrometry. Biomed. Chromatogr. 15, 518 (2001) |
| 12       | A03           | N-165  | 119630-94-3 | 445.52                | Naloxone benzoylhydrazone                                        | [[5alpha]-4,5-Epoxy-3,14-dihydroxy-17-(2-propenyl)morphinan-6-ylidene]hydrazide benzoic acid                           | Opioid          |        | Agonist    | kappa          | Yes                 |                    | Gistrak, M.A., et al., Pharmacological actions of a novel mixed opiate agonist/antagonist: Naloxone benzoylhydrazone J. Pharmacol. Exp. Ther. 251, 469-476 (1989)                                            |
| 12       | A04           | O 0886 | 101622-51-9 | 298.35                | Olomoucine                                                       | 2-[[9-Methyl-6-((phenylmethyl)amino)-9H-purin-2-yl]amino]-ethanol                                                      | Phosphorylation | Enzyme | Inhibitor  | PK             |                     |                    | Vesely, J., et al., Inhibition of cyclin-dependent kinases by purine analogues. Eur. J. Biochem. 224, 771-786 (1994)                                                                                         |
| 12       | A05           | O 3752 | 341-69-5    | 305.85                | Orphenadrine hydrochloride                                       | beta-Dimethylaminoethyl 2-methylbenzhydryl ether hydrochloride                                                         | Cholinergic     |        | Antagonist | Muscarinic     |                     |                    | Kornhuber, J., et al., Orphenadrine is an uncompetitive N-methyl-D-aspartate (NMDA) receptor antagonist: binding and patch clamp studies J. Neural Trans. 102, 237-246 (1995)                                |
| 12       | A06           | O-111  | 4789-68-8   | 460.98                | (±)-Octoclotheptin maleate                                       | 1-(8-Chloro-10,11-dihydrobenzo[b,f]thiepin-10-yl)-4-methyl-piperazine maleate                                          | Dopamine        |        | Antagonist | D2             |                     |                    | Hyttle, J., Amt, J., Characterization of binding of 3H-SCH 23390 to dopamine D1 receptors. Correlation to other D-1 and D-2 measures and effect of selective lesions J. Neural Trans. 68, 171 (1987)         |
| 12       | A07           | P 0878 | 40741-0     | 185.07                | O-Phospho-L-serine                                               | L-Phosphoserine                                                                                                        | Glutamate       |        | Antagonist | NMDA           |                     |                    | Klunk, et al., Possible roles of L-phosphoserine in the pathogenesis of Alzheimer's disease. Mol. Chem. Neurophathol. 15, 51-73 (1991)                                                                       |
| 12       | A08           | P 1918 | 15500-66-0  | 732.69                | Pancuronium bromide                                              | 1,1'-((2beta,3alpha,5alpha,16beta,17beta)-3,17-Bis[acetyloxy]androstane-2,16-diylo)bis(1-methylpiperidinium) dibromide | Cholinergic     |        | Antagonist |                |                     |                    | Garland, C.M., et al., The actions of muscle relaxants at nicotinic acetylcholine receptor isoforms Eur. J. Pharmacol. 357, 83-92 (1998)                                                                     |
| 12       | A09           | P 3520 | 52-62-0     | 538.60                | Pentolinium di[L(+)-tartrate]                                    | 1,1'-Pentamethylenebis(1-methylpyrrolidinium hydrogen tartrate)                                                        | Cholinergic     |        | Antagonist | Nicotinic      |                     |                    | Koga, et al., Roles of nitric oxide in the spinal cord in cardiovascular regulation in rats Neurosci. Lett. 267, 173-176 (1999)                                                                              |
| 12       | A10           | P 4543 | 1069-66-5   | 166.20                | Valproic acid sodium                                             | 2-Propylpentanoic acid sodium                                                                                          | Anticonvulsant  |        |            |                | Yes                 | 50 mg/ml           | Della Paschoa, O.E., et al., Modelling of the pharmacodynamic interaction between phenytoin and sodium valproate. Br. J. Pharmacol. 125, 1610-1616 (1998)                                                    |
| 12       | A11           | P 5514 | 59-33-6     | 401.47                | Pyrilamine maleate                                               | Mepyramine maleate                                                                                                     | Histamine       |        | Antagonist | H1             |                     |                    | Haley, Physical and biological properties of pyrilamine. J. Pharm. Sci. 72, 3 (1983)                                                                                                                         |
| 12       | B02           | N-149  | 66085-59-4  | 418.45                | Nimodipine                                                       | 1,4-Dihydro-2,6-dimethyl-4-(3-nitrophenyl)-3,5-pyridinecarboxylic acid 2-methoxyethyl 1-methylethyl ester              | Ca2+ Channel    |        | Antagonist | L-type         | Insoluble           |                    | Dolin, et al., Anticonvulsant profile of the dihydropyridine calcium channel antagonists nitrendipine and nimodipine Eur. J. Pharmacol. 152, 19-27 (1988)                                                    |
| 12       | B03           | N-170  | 153587-01-0 | 362.23                | NS-1619                                                          | 1,3-Dihydro-1-[2-hydroxy-5-(trifluoromethyl)phenyl]-5-(trifluoromethyl)-2H-benzimidazol-2-one                          | K+ Channel      |        | Activator  | Ca2+ activated | Insoluble           |                    | Oleson, et al., Selective activation of Ca2+-dependent K+ channels by novel benzimidazolone Eur. J. Pharmacol. 251, 53-59 (1994)                                                                             |



| Rack No. | Rack Position | CATNUM | CAS number  | Mol. Weight Structure | Name                                        | Secondary Name                                                                                  | Class                 | Enzyme | Action     | Selectivity          | Solubility in Water | Solubility in DMSO | Reference                                                                                                                                                                                                                                                       |
|----------|---------------|--------|-------------|-----------------------|---------------------------------------------|-------------------------------------------------------------------------------------------------|-----------------------|--------|------------|----------------------|---------------------|--------------------|-----------------------------------------------------------------------------------------------------------------------------------------------------------------------------------------------------------------------------------------------------------------|
| 12       | B04           | O 1008 | 112-80-1    | 282.47                | Oleic Acid                                  | Elainic acid                                                                                    | Phosphorylation       | Enzyme | Activator  | PKC                  |                     |                    | Diaz-Guerra, M.J., J. Biol. Chem. 266, 23568 (1991)                                                                                                                                                                                                             |
| 12       | B05           | T 5575 | 300801-52-9 | 249.33                | TG003                                       | (Z)-1-(3-Ethyl-5-methoxy-2,3-dihydrobenzothiazol-2-ylidene)-propan-2-one                        | Cell Cycle            | Enzyme | Inhibitor  | Clk                  |                     | 33 mg/ml           | Muraki, M., et al., J. Biol. Chem. 279, 24246-24254 (2004)                                                                                                                                                                                                      |
| 12       | B06           | P 0130 | 57-83-0     | 314.47                | Progesterone                                | 4-Pregnene-3,20-dione                                                                           | Hormone               |        |            | Progesterone         |                     |                    | Lanari, C., and Molinolo, A.A., Progesterone receptors-animal models and cell signalling in breast cancer. Diverse activation pathways for the progesterone receptor: possible implications for breast biology and cancer. Breast Cancer Res. 4, 240-243 (2002) |
| 12       | B07           | P 0884 | 318-98-9    | 295.81                | (±)-Propranolol hydrochloride               | (±)-1-(Isopropylamino)-3-(1-naphthyl)-2-propanol hydrochloride                                  | Adrenoceptor          |        | Antagonist | beta                 | Yes                 | 50 mg/ml with heat | Alexander, B.S., and Wood, M.D., Stereoselective blockade of central [3H]5-hydroxytryptamine binding to multiple sites (5-HT1A, 5-HT1B and 5-HT1C) by mianserin and propranolol. J. Pharm. Pharmacol. 39, 664-666 (1987)                                        |
| 12       | B08           | P 2016 | 567-02-2    | 334.50                | 3-alpha,21-Dihydroxy-5-alpha-pregnan-20-one | 5-alpha-THDOC                                                                                   | GABA                  |        | Modulator  | GABA-A               |                     |                    | Zaman, et al., Effects of subunit types of the recombinant GABA receptor on the response to a neurosteroid. Eur. J. Pharmacol. 225, 321 (1992)                                                                                                                  |
| 12       | B09           | P 4015 | 14901-16-7  | 235.33                | 1-Phenyl-3-(2-thiazolyl)-2-thiourea         |                                                                                                 | Dopamine              | Enzyme | Inhibitor  | beta-Hydroxylase     |                     |                    | Johnson, G.A., et al., J. Pharmacol. Exp. Ther. 171, 80 (1970)                                                                                                                                                                                                  |
| 12       | B10           | P 4651 | 58-33-3     | 320.89                | Promethazine hydrochloride                  |                                                                                                 | Histamine             |        | Antagonist | H1                   |                     |                    | Li and Hatton, Histamine-induced prolonged depolarization in rat supraoptic neurons: G-protein-mediated Ca(2+)-independent suppression of K+ leakage conductance. Neuroscience 70, 145 (1996)                                                                   |
| 12       | B11           | P 5654 |             | 331.35                | Piroxicam                                   | 4-Hydroxy-2-methyl-3-(pyrid-2-yl-carbamoyl)-2H-1,2-benzothiazine 1,1-dioxide                    | Prostaglandin         | Enzyme | Inhibitor  | COX                  |                     |                    |                                                                                                                                                                                                                                                                 |
| 12       | C02           | N-151  | 57754-86-6  | 307.82                | Nisoxetine hydrochloride                    | LY-94,939                                                                                       | Adrenoceptor          |        | Blocker    | Reuptake             | Yes                 | 20 mg/ml           | Wong, D.T., et al., dl-N-Methyl-3-(o-methoxyphenoxy)-3-phenylpropylamine hydrochloride, Lilly 94939, a potent inhibitor for uptake of norepinephrine into rat brain synaptosomes and heart. Life Sci. 17, 755-760 (1975)                                        |
| 12       | C03           | N-176  | 82824-01-9  | 723.70                | Naloxonazine dihydrochloride                | Bis(5-alpha-4,5-epoxy-3,14-dihydroxy-17-[2-propenyl]morphinan-6-ylidene)hydrazone               | Opioid                |        | Antagonist | mu1                  | Yes                 | >24 mg/ml          | Cruciani, et al., Naloxonazine effects on the interaction of enkephalin analogs with mu1 and mu2 binding sites in rat brain membranes J. Pharmacol. Exp. Ther. 242, 15-20 (1987)                                                                                |
| 12       | C04           | O 2378 | 2315-02--8  | 296.84                | Oxymetazoline hydrochloride                 | 3-[(4,5-Dihydro-1H-imidazol-2-yl)methyl]-6-(1,1-dimethylethyl)-2,4-dimethylphenol hydrochloride | Adrenoceptor          |        | Agonist    | alpha2A              | Yes                 |                    | Schoeffer, P., Hoyer, D., Interaction of the alpha-adrenoceptor agonist oxymetazoline with serotonin 5-HT1A, 5-HT1B, 5-HT1C, and 5-HT1D receptors. Eur. J. Pharmacol. 196, 213 (1991)                                                                           |
| 12       | C05           | O 8757 | 82419-36-1  | 361.38                | Ofloxacin                                   | Ofloxacin; DL-8280; HOE-280                                                                     | Antibiotic            |        |            | DNA Synthesis        |                     |                    | Seibert, G., et al., Eur. J. Clin. Microbiol. 2, 548 (1983)                                                                                                                                                                                                     |
| 12       | C06           | P 0359 | 544-31-0    | 299.50                | Palmitoylethanolamide                       | Palmidrol                                                                                       | Cannabinoid           |        | Agonist    | CB2                  |                     |                    | Griffen, G., et al., Cloning and pharmacological characterization of the rat CB2cannabinoid receptor J. Pharmacol. Exp. Ther. 292, 886-894 (2000)                                                                                                               |
| 12       | C07           | P 1061 | 62-68-0     | 389.97                | SKF-525A hydrochloride                      | Proadifen hydrochloride                                                                         | Multi-Drug Resistance | Enzyme | Inhibitor  | Microsomal oxidation |                     |                    | Bruce J.I., et al., Br J Pharmacol. 2000 Oct;131(4):761-71                                                                                                                                                                                                      |
| 12       | C08           | P 2116 | 53179-13-8  | 185.23                | Pirfenidone                                 | 5-Methyl-1-phenyl-2-(1H)-pyridone                                                               | Immune System         |        | Inhibitor  |                      | Yes                 | up to 10 mM        | Byung-Seok, L., J. Clin. Endocrinol. Metab. 83, 219 (1998)                                                                                                                                                                                                      |
| 12       | C09           | T 9567 | 82079-32-1  | 210.30                | Thiolactomycin                              | [R-(E)]-4-hydroxy-3,5-dimethyl-5-(2-methyl-1,3-butadienyl)-2(5H)-thiophenone                    | Antibiotic            | Enzyme | Inhibitor  | Myristate synthesis  | Yes                 | >24 mg/ml          | Morita, Y.S., et al., Specialized fatty acid synthesis in African trypanosomes: myristate for GPI anchors. Science 140 (2000)                                                                                                                                   |
| 12       | C10           | P 4668 | 55268-74-1  | 312.42                | Praziquantel                                | 2-(Cyclohexylcarbonyl)-1,2,3,6,7-11b-hexahydro-4H-pyrazino[2,1a]isoquinolin-4-one               | Antibiotic            |        |            | Ca2+ Ionophore       |                     |                    | William S., et al., Int J Parasitol. 2004 Jul;34(8):971-7                                                                                                                                                                                                       |
| 12       | C11           | P 5679 | 41078-02-8  | 194.19                | 3-n-Propylxanthine                          | Enprofylline                                                                                    | Adenosine             |        | Antagonist | A1 > A2              | Yes                 |                    | Ukena, et al., Eur. J. Pharmacol. 117, 25 (1985)                                                                                                                                                                                                                |
| 12       | D02           | N-153  | 849-55-8    | 335.88                | Nylidrin hydrochloride                      |                                                                                                 | Adrenoceptor          |        | Agonist    | beta                 |                     |                    | Hofner G., et al., Eur J Pharmacol. 2000 Apr 14;394(2-3):211-9                                                                                                                                                                                                  |
| 12       | D03           | N-183  | 118876-58-7 | 380.25                | NBQX disodium                               | FG9202 disodium                                                                                 | Glutamate             |        | Antagonist | AMPA/kainate         | Yes                 | 40 mg/ml           | Randle, et al., Competitive inhibition by NBQX of kainate/AMPA receptor currents and excitatory synaptic potentials: importance of 6-nitro-substitution. Eur. J. Pharmacol. 215, 237 (1992)                                                                     |

| Rack No. | Rack Position | CATNUM | CAS number  | Mol. Weight Structure | Name                                 | Secondary Name                                                                      | Class                | Enzyme | Action       | Selectivity           | Solubility in Water | Solubility in DMSO | Reference                                                                                                                                                                                                                                                |
|----------|---------------|--------|-------------|-----------------------|--------------------------------------|-------------------------------------------------------------------------------------|----------------------|--------|--------------|-----------------------|---------------------|--------------------|----------------------------------------------------------------------------------------------------------------------------------------------------------------------------------------------------------------------------------------------------------|
| 12       | D04           | O 2751 | 565-73-1    | 111.03                | Sodium Oxamate                       | Oxalic acid monoamide sodium salt                                                   | Biochemistry         | Enzyme | Inhibitor    | Lactate Dehydrogenase |                     |                    | Liu H., Biochemistry. 2001 May 8;40(18):5542-7                                                                                                                                                                                                           |
| 12       | D05           | O 9126 | 17360-35-9  | 760.80                | Oxotremorine sesquifumarate salt     | 1-(4-[1-Pyrrolidinyl]-2-butynyl)-2-pyrrolidinone                                    | Cholinergic          |        | Agonist      | M2                    | Yes                 | 50 mg/ml           | Ringdahl, B., Jenden, D.J., Pharmacological properties of oxotremorine and its analogs Life Sci. 32, 2401 (1983)                                                                                                                                         |
| 12       | D06           | P 0453 | 10083-24-6  | 244.25                | Piceatannol                          | (E)-4-[2-(3,5-Dihydroxyphenyl)ethenyl]1,2-benzenediol                               | Phosphorylation      | Enzyme | Inhibitor    | Syk / Lck             | Yes                 | 0.5 mg/ml          | Cambien, et al., Src-regulated extracellular signal-related kinase and syk-regulated c-Jun N-terminal kinase pathways act in conjunction to induce IL-1 synthesis in response to microtubule disruption in HL60 cells. J. Immunol. 163, 5079-5085 (1999) |
| 12       | D07           | P 1675 | 124-87-8    | 602.60                | Picrotoxin                           |                                                                                     | GABA                 |        | Antagonist   | GABA-C                |                     |                    | Yoon, K.W., et al., Multiple mechanisms of picrotoxin block of GABA-induced currents in rat hippocampal neurons. J. Physiol. 464, 423 (1993)                                                                                                             |
| 12       | D08           | P 2278 | 961-45-5    | 256.27                | 1,3-Dimethyl-8-phenylxanthine        | 8-Phenyltheophylline                                                                | Adenosine            |        | Antagonist   | A1                    | Slightly Soluble    |                    | Bruns, et al., Mol. Pharmacol. 29, 331 (1986)                                                                                                                                                                                                            |
| 12       | D09           | P 4394 | 15663-27-1  | 300.06                | Cisplatin                            | cis-Diammineplatinum(II) dichloride                                                 | DNA                  |        | Intercalator |                       |                     |                    | Singh, R.A., and Sodhi, A., Antigen presentation by cisplatin-activated macrophages: role of soluble factor(s) and second messengers. Immunol. Cell Biol. 76, 513-519 (1998)                                                                             |
| 12       | D10           | P 4670 | 54063-53-5  | 377.92                | Propafenone hydrochloride            | 1-(2-[2-Hydroxy-3-(propylamino)propoxy]phenyl)-3-phenyl-1-propanone                 | K+ Channel           |        | Blocker      | hKv1.5                |                     |                    | Koller, R., and Franz, M.R., New classification of moricizine and propafenone based on electrophysiologic and electrocardiographic data from isolated rabbit heart. J. Cardiovasc. Pharmacol. 24, 753-760 (1994)                                         |
| 12       | D11           | P 6126 | 61-76-7     | 203.67                | Phenylephrine hydrochloride          |                                                                                     | Adrenoceptor         |        | Agonist      | alpha1                |                     |                    | Lazou, A., et al., Activation of mitogen-activated protein kinases (p38-MAPKs, SAPKs/JNKs and ERKs) by the G-protein-coupled receptor agonist phenylephrine in the perfused rat heart. Biochem. J. 332, 459-465 (1998)                                   |
| 12       | E02           | N-154  | 109292-91-3 | 217.28                | N6-Cyclopentyl-9-methyladenine       | N-0840                                                                              | Adenosine            |        | Antagonist   | A1                    | Insoluble           |                    | Ukena, et al., N6-Substituted 9-methyladenines: A new class of adenosine receptor antagonists. FEBS Lett. 215, 203 (1987)                                                                                                                                |
| 12       | E03           | N-211  |             | 269.06                | NS 2028                              | 4H-8-Bromo-1,2,4-oxadiazolo(3,4-d)benz(b)(1,4)oxazin-1-one                          | Cyclic Nucleotides   | Enzyme | Inhibitor    | Guanylate cyclase     |                     |                    | Olesen, et al., Characterization of NS 2028 as a specific inhibitor of soluble guanylyl cyclase Br. J. Pharmacol. 123, 299-309 (1998)                                                                                                                    |
| 12       | E04           | O 2881 | 1508-65-2   | 393.96                | Oxybutynin Chloride                  | alpha-Phenylcyclohexaneglycolic acid 4-(diethylamino)-2-butynyl ester hydrochloride | Cholinergic          |        | Antagonist   | Muscarinic            | Yes                 | 50 mg/ml           | Watson, N., et al., Comparative pharmacology of recombinant human M3and M5muscarinic receptors expressed in CHO-K1 cells Br. J. Pharmacol. 127, 590-596 (1999)                                                                                           |
| 12       | E05           | O 9387 | 60607-34-3  | 426.57                | Oxatomide                            | 1-[3-[4-(Diphenylmethyl)-1-piperazinyl]propyl]-1,3-dihydro-2H-benzimidazol-2-one    | Immune System        |        | Modulator    |                       |                     |                    | Kosaka, Y., et al., Agents and Actions 21, 32 (1985)                                                                                                                                                                                                     |
| 12       | E06           | P 0547 | 140-64-7    | 592.69                | Pentamidine isethionate              | 4'4-[1,5-Pentanediybis(oxy)]bis-benzenecarboximidamide isethionate                  | Glutamate            |        | Antagonist   | NMDA                  |                     |                    | Reynolds, et al., Pentamidine is an N-methyl-D-aspartate receptor antagonist and is neuroprotective in vitro. J. Neurosci. 12, 970 (1992)                                                                                                                |
| 12       | E07           | P 1726 |             | 187.16                | 4-Phenyl-3-furoxancarbonitrile       | Furoxan                                                                             | Nitric Oxide         |        | Donor        |                       |                     |                    | Medana, C., et al., J. Med. Chem. 37, 4412 (1994)                                                                                                                                                                                                        |
| 12       | E08           | P 2607 |             | 353.89                | PRE-084                              |                                                                                     | Opioid               |        | Agonist      | sigma1                | Yes                 | 24 mg/ml           | Maurice, T., et al., Br. J. Pharmacol. 127, 335-342 (1999)                                                                                                                                                                                               |
| 12       | E09           | P 4405 | 518-28-5    | 414.42                | Podophyllotoxin                      |                                                                                     | Cytoskeleton and ECM |        | Inhibitor    |                       |                     |                    | Damayanthi, Y. and Lown, J.W., Curr. Med. Chem. 5, 205 (1998)                                                                                                                                                                                            |
| 12       | E10           | P 5052 |             | 332.49                | 5alpha-Pregnan-3alpha-ol-11,20-dione | Alfaxalone                                                                          | GABA                 |        | Modulator    | GABA-A                |                     |                    | Sooksawate and Simmonds, Increased membrane cholesterol reduces the potentiation of GABA(A) currents by neurosteroids in dissociated hippocampal neurones Neuropharmacology 37, 1103 (1998)                                                              |
| 12       | E11           | P 6402 | 58-39-9     | 403.98                | Perphenazine                         |                                                                                     | Dopamine             |        | Antagonist   | D2                    |                     |                    | Okumura, K., et al., BMY-14802 reversed the sigma receptor agonist-induced neck dystonia in rats J. Neural Trans. 103, 1153-1161 (1996)                                                                                                                  |
| 12       | F02           | N-156  | 122517-78-6 | 511.60                | Nalttriben methanesulfonate          | NTB                                                                                 | Opioid               |        | Antagonist   | delta2                | Yes                 | 0.6 mg/ml          | Takemori, A.E., et al., Agonist and antagonist activities of ligands derived from naltrexone and oxymorphone. Life Sci. 50, 1491-1495 (1992)                                                                                                             |
| 12       | F03           | O 0250 | 770-05-8    | 189.64                | (±)-Octopamine hydrochloride         | (±)-alpha-(Aminomethyl)-4-hydroxybenzyl alcohol hydrochloride                       | Adrenoceptor         |        | Agonist      | alpha                 | Yes                 |                    | Airriess, C.N., et al., Selective inhibition of adenylyl cyclase by octopamine via a human cloned2A-adrenoceptor. Br. J. Pharmacol. 122, 191-198 (1997)                                                                                                  |

| Rack No. | Rack Position | CATNUM | CAS number  | Mol. Weight Structure | Name                            | Secondary Name                                                                     | Class              | Enzyme | Action     | Selectivity                   | Solubility in Water | Solubility in DMSO | Reference                                                                                                                                                                                       |
|----------|---------------|--------|-------------|-----------------------|---------------------------------|------------------------------------------------------------------------------------|--------------------|--------|------------|-------------------------------|---------------------|--------------------|-------------------------------------------------------------------------------------------------------------------------------------------------------------------------------------------------|
| 12       | F04           | O 3011 | 62613-82-5  | 158.16                | Oxiracetam                      | 4-Hydroxy-2-oxopyrrolidine-N-acetamide                                             | Nootropic          |        |            |                               |                     |                    | Raiteri, M., et al., Neurosci. Lett. 145, 109 (1992)                                                                                                                                            |
| 12       | F05           | S 3442 | 208744-09-4 | 371.23                | SB 216763                       | 3-(2,4-Dichlorophenyl)-4-(1-methyl-1H-indol-3-yl)-1H-pyrrole-2,5-dione             | Phosphorylation    | Enzyme | Inhibitor  | GSK-3                         | Insoluble           |                    | Smith, D.G., et al., 3-Anilino-4-arylmaleimides: potent and selective inhibitors of glycogen synthase kinase-3 (GSK-3). Bioorg. Med. Chem. Lett. 11, 635-639 (2001)                             |
| 12       | F06           | P 0618 |             | 312.25                | cis-(±)-8-OH-PBZI hydrobromide  | cis-(±)-1,2,3a,4,5,9b-hexahydro-1H-benz[e]indole hydrobromide                      | Dopamine           |        | Agonist    | D3                            | Yes                 | 10 mg/ml           | Fink-Jensen, A., et al., Eur. J. Pharmacol. 342, 153-161 (1998)                                                                                                                                 |
| 12       | F07           | P 1784 | 6493-05-6   | 278.31                | Pentoxifylline                  | 3,7-Dihydro-3,7-dimethyl-1-(5-oxohexyl)-1H-purine-2,6-dione                        | Cyclic Nucleotides | Enzyme | Inhibitor  | PDE                           | Yes                 | >43 mg/ml          | Reuter, et al., Phosphodiesterase inhibitors prevent NSAID enteropathy independently of effects on TNF-alpha release Am. J. Physiol. 277, 854 (1999)                                            |
| 12       | F08           | P 2738 |             | 694.37                | PPNDS tetrasodium               | Pyridoxal-5-phosphate-6-(2'-naphthylazo-6'-nitro-4',8'-disulfonate) tetrasodium    | P2 Receptor        |        | Antagonist | P2X1                          | Yes                 | 38 mg/ml           | Lambrech, G., Eur. J. Pharmacol. 387, 19 (2000)                                                                                                                                                 |
| 12       | F09           | P 4484 |             | 388.90                | Purvalanol A                    | NG-60                                                                              | Phosphorylation    | Enzyme | Inhibitor  | CDK                           |                     |                    | Gray, N.S. et al., Exploiting chemical libraries, structure and genomics in the search for kinase inhibitors Science 281, 533 (1998)                                                            |
| 12       | F10           | P 5114 | 546-48-5    | 305.37                | Pempidine tartrate              | Pirilene                                                                           | Cholinergic        |        | Antagonist | Nicotinic                     |                     |                    | Lee J.E., et al., Nature 181, 1717 (1958)                                                                                                                                                       |
| 12       | F11           | P 6500 | 54-95-5     | 138.17                | Pentylentetrazole               | Metrazole                                                                          | Neurotransmission  |        | Modulator  | CNS                           |                     |                    | Suzuki, T., et al., Eur. J. Pharmacol. 369, 163 (1999)                                                                                                                                          |
| 12       | G02           | N-158  | 57149-07-2  | 465.42                | Naftopidil dihydrochloride      | KT-611 dihydrochloride                                                             | Adrenoceptor       |        | Antagonist | alpha 1                       | Insoluble           |                    | Yamada, S., et al., Binding characteristics of naftopidil and alpha 1-adrenoceptor antagonists to prostatic alpha 1-adrenoceptors in benign prostatic hypertrophy. Life Sci. 50, 127-135 (1992) |
| 12       | G03           | O 0383 | 111-58-0    | 325.54                | N-Oleylethanolamine             | N-(Hydroxyethyl)oleamide                                                           | Sphingolipid       | Enzyme | Inhibitor  | Ceramidase                    |                     |                    | Ramachandran, C.K., et al., Biochem. Arch. 8, 369 (1992)                                                                                                                                        |
| 12       | G04           | O 3125 | 11018-89-6  | 584.67                | Ouabain                         | Acocantherine                                                                      | Ion Pump           |        | Inhibitor  | Na+/K+ ATPase                 | Yes                 | 10 mg/ml           | Peng, M., et al., Partial inhibition of Na+/K+-ATPase by ouabain induces the Ca2+-dependent expressions of early-response genes in cardiac myocytes. J. Biol. Chem. 271, 10372-10378 (1996)     |
| 12       | G05           | O 9637 | 21256-18-8  | 293.33                | Oxaprozin                       | Daypro                                                                             | Prostaglandin      | Enzyme | Inhibitor  |                               |                     |                    | Todd, P. A., Oxaprozin. A preliminary review of its pharmacodynamic and pharmacokinetic properties, and therapeutic efficacy Drugs 32, 291 (1986)                                               |
| 12       | G06           | P 0667 | 20554-84-1  | 248.32                | Parthenolide                    |                                                                                    | Serotonin          |        | Inhibitor  |                               |                     |                    | Kwok, B.H., et al., The anti-inflammatory natural product parthenolide from the medicinal herb Feverfew directly binds to and inhibits Ikb kinase. Chem. Biol. 8, 759-766 (2001)                |
| 12       | G07           | P 1793 | 2062-78-4   | 461.56                | Pimozide                        |                                                                                    | Dopamine           |        | Antagonist | D2                            | Insoluble           |                    | Ishine, T., Serotonin 5-HT7 receptors mediate relaxation of porcine pial veins. Am. J. Physiol. Heart Circ. Physiol. 278, 0 (2000)                                                              |
| 12       | G08           | P 2742 |             | 217.29                | PD 404,182                      | 6H-6-Imino-(2,3,4,5-tetrahydropyrimido)[1,2-c][1,3]benzothiazine                   | Biochemistry       | Enzyme | Inhibitor  | KDO-8-P synthase              | Insoluble           |                    | Birck MR, et al. Identification of a slow tight-binding inhibitor of 3-deoxy-D-manno-oculosonic acid 8-phosphate Synthase J. Amer. Chem. Soc. 122, 9334 (2000)                                  |
| 12       | G09           | P 4509 | 6865-14-1   | 436.08                | Palmitoyl-DL-Carnitine chloride |                                                                                    | Phosphorylation    | Enzyme | Modulator  | PKC                           | Yes                 | 25 mg/ml           | Nakadate, T., and Blumberg, P.M., Modulation by palmitoylcarnitine of protein kinase C activation Cancer Res. 47, 6537-6542 (1987)                                                              |
| 12       | G10           | P 5295 | 7491-74-9   | 142.16                | Piracetam                       | 2-Oxo-1-pyrrolidineacetamide                                                       | Glutamate          |        | Modulator  | AMPA                          |                     |                    | Gouliava, A.H., Senning, A, Brain Res. Rev. 19, 180 (1994)                                                                                                                                      |
| 12       | G11           | P 6503 | 54-71-7     | 244.72                | (+)-Pilocarpine hydrochloride   |                                                                                    | Cholinergic        |        | Agonist    | Muscarinic                    | Yes                 | 100 mg/ml          | Mastanski, J.A., et al., Assessment of the muscarinic receptor subtypes involved in pilocarpine-induced seizures in mice Neurosci. Lett. 168, 225-228 (1994)                                    |
| 12       | H02           | B 9305 | 72814-32-5  | 368.48                | BW 245C                         | (R*,S*)-(+/-)-3-(3-cyclohexyl-3-hydroxypropyl)-2,5-dioxo-4-imidazoleheptanoic acid | Prostanoids        |        | Agonist    | DP                            |                     |                    | Trist, D. G., et al., The antagonism by BW A868C of PGD2 and BW245C activation of human platelet adenylylate cyclase Br. J. Pharmacol. 96, 301-306 (1989)                                       |
| 12       | H03           | O 0877 | 14698-29-4  | 261.24                | Oxolinic acid                   | W-4565; 5,8-Dihydro-5-ethyl-8-oxo-1,3-dioxolo[4,5-g]quinoline-7-carboxylic acid    | Antibiotic         | Enzyme | Inhibitor  | DNA Gyrase                    |                     |                    | Chen C.R., et al., J Mol Biol. 1996 May 17;258(4):627-37                                                                                                                                        |
| 12       | H04           | O 3636 | 41443-28-1  | 187.16                | ODQ                             | 1H-[1,2,4]Oxadiazolo[4,3-a]quinoxalin-1-one                                        | Cyclic Nucleotides | Enzyme | Inhibitor  | NO-sensitive guanylyl cyclase | Insoluble           |                    | Brunner, et al., Novel guanylyl cyclase inhibitor ODQ reveals role of nitric oxide but not of cyclic-GMP in endothelin-1 secretion. FEBS Lett. 376, 262-266                                     |

| Rack No. | Rack Position | CATNUM | CAS number  | Mol. Weight Structure | Name                                     | Secondary Name                                                                                           | Class              | Enzyme | Action     | Selectivity         | Solubility in Water | Solubility in DMSO | Reference                                                                                                                                                                                                                                                                 |
|----------|---------------|--------|-------------|-----------------------|------------------------------------------|----------------------------------------------------------------------------------------------------------|--------------------|--------|------------|---------------------|---------------------|--------------------|---------------------------------------------------------------------------------------------------------------------------------------------------------------------------------------------------------------------------------------------------------------------------|
| 12       | H05           | O-100  | 63939-65-1  | 322.19                | Oxotremorine methiodide                  | N,N,N-Trimethyl-4-(2-oxo-1-pyrrolidiny)-2-butyln-1-ammonium iodide                                       | Cholinergic        |        | Agonist    | Muscarinic          | Yes                 | 24 mg/ml           | (1995)<br>Gillard, M., Muscarinic receptor heterogeneity in rat central nervous system. II. Brain receptors labeled by [3H]oxotremorine-M correspond to heterogeneous M2 receptors with very high affinity for agonists. Mol. Pharmacol. 32, 100 (1987)                   |
| 12       | H06           | P 0778 | 15323-86-9  | 248.33                | Pindolol                                 |                                                                                                          | Adrenoceptor       |        | Antagonist | beta                | Insoluble           |                    | Watkins, D.J., et al., Loss of [125I]-pindolol binding to beta-adrenoceptors on rat nodose ganglion after chronic isoprenaline treatment. J. Auton. Nerv. Syst. 60, 12-16 (1996)                                                                                          |
| 12       | H07           | P 1801 | 340-90-9    | 277.24                | L-Glutamic acid, N-phthaloyl-            |                                                                                                          | Glutamate          |        | Agonist    | NMDA                |                     |                    | Sauer H., et al., Am J Pathol. 2000 Jan;156(1):15-8                                                                                                                                                                                                                       |
| 12       | H08           | P 3510 | 61-25-6     | 375.86                | Papaverine hydrochloride                 |                                                                                                          | Cyclic Nucleotides | Enzyme | Inhibitor  | PDE                 | Yes                 | 25 mg/ml           | Poeh, G., and Kukovetz, W.R., Life Sci. 10, 133 (1971)                                                                                                                                                                                                                    |
| 12       | H09           | P 4532 | 38594-96-6  | 385.43                | R(-)-N6-(2-Phenylisopropyl)adenosine     | R(-)-PIA                                                                                                 | Adenosine          |        | Agonist    | A1                  | Yes                 | 0.3 mg/ml          | Daly, J.W., J. Med. Chem. 25, 197 (1982)                                                                                                                                                                                                                                  |
| 12       | H10           | P 5396 | 26016-99-9  | 182.02                | Phosphomycin disodium                    | Fosfomycin; Phosphonomycin; MK-955                                                                       | Antibiotic         |        |            | Cell wall synthesis |                     |                    | Kim, D.H., et al., Characterization of a Cys115to Asp substitution in the Escherichia colicell wall biosynthetic enzyme UDP-GlcNAc enolpyruvyl transferase (MurA) that confers resistance to inactivation by the antibiotic fosfomycin. Biochemistry 35, 4923-4928 (1996) |
| 12       | H11           | P 6628 | 148-72-1    | 271.28                | Pilocarpine nitrate                      |                                                                                                          | Cholinergic        |        | Agonist    | Muscarinic          | Yes                 | 100 mg/ml          | Maslanski, J.A., et al., Assessment of the muscarinic receptor subtypes involved in pilocarpine-induced seizures in mice Neurosci. Lett. 168, 225-228 (1994)                                                                                                              |
| 13       | A02           | P 6656 | 53-60-1     | 320.89                | Promazine hydrochloride                  | 10-(3-[Dimethylamino]propyl)phenothiazine hydrochloride                                                  | Dopamine           |        | Antagonist | D2                  |                     |                    | Daniel, W.A., et al., The influence for selective serotonin reuptake inhibitors in the plasma and brain pharmacokinetics of the simplest phenothiazine neuroleptic promazine in the rat. Eur. Neuropsychopharmacol. 9, 337 (1999)                                         |
| 13       | A03           | P 7412 | 29868-97-1  | 424.33                | Pirenzepine dihydrochloride              | 5,11-Dihydro-11-[(4-methyl-1-piperaziny)acetyl]-6H-pyrido[2,3-b][1,4]benzodiazepin-6-one dihydrochloride | Cholinergic        |        | Antagonist | M1                  | Yes                 | 50 mg/ml           | Pelat, M., et al., Characterization of the central muscarinic cholinergic receptors involved in the cholinergic pressor response in anesthetized dogs Eur. J. Pharmacol. 379, 117-124 (1999)                                                                              |
| 13       | A04           | P 8227 |             | 444.26                | 1,3-PBIT dihydrobromide                  | Phenylene-1,3-bis(ethane-2-isothiourea) dihydrobromide                                                   | Nitric Oxide       | Enzyme | Inhibitor  | NOS                 |                     |                    | Garvey, E.P., Potent and selective inhibition of human nitric oxide synthases. Inhibition by non-amino acid isothioureas J. Biol. Chem. 269, 26669 (1994)                                                                                                                 |
| 13       | A05           | P 8782 | 46026-75-9  | 173.17                | (±)-cis-Piperidine-2,3-dicarboxylic acid |                                                                                                          | Glutamate          |        | Agonist    | NMDA                |                     |                    | Collingridge, G. L., et al., Excitatory amino acid receptors in the vertebrate central nervous system Pharmacol. Rev. 40, 143-210 (1989)                                                                                                                                  |
| 13       | A06           | P 9233 |             | 414.42                | Piribedil maleate                        | 2-(4-[1,3-Benzodioxol-5-ylmethyl]-1-piperaziny)pyrimidine                                                | Dopamine           |        | Agonist    | D3                  | Yes                 | >10 mg/ml          | Cagnotto, A., et al., Eur. J. Pharmacol. 313, 63 (1996)                                                                                                                                                                                                                   |
| 13       | A07           | P 9879 | 51-05-8     | 272.78                | Procaine hydrochloride                   | Novocaine hydrochloride                                                                                  | Na+ Channel        |        | Blocker    |                     |                     |                    | Dudel, J., et al., J. Neurophysiol. 81, 2386 (1999)                                                                                                                                                                                                                       |
| 13       | A08           | P-118  | 114012-12-3 | 249.64                | Phaclofen                                | 3-Amino-2-(4-chlorophenyl)propylphosphonic acid                                                          | GABA               |        | Antagonist | GABA-B              |                     |                    | Kerr, et al., Phaclofen: A peripheral and central baclofen antagonist Brain Res. 405, 150-154 (1987)                                                                                                                                                                      |
| 13       | A09           | P-162  |             | 418.53                | Pregnenolone sulfate sodium              | 5-Pregnen-3beta-ol-20-one sulfate sodium                                                                 | GABA               |        | Antagonist | GABA-A              |                     |                    | Mienville et al., Pregnenolone sulfate antagonizes GABA receptor-mediated currents via a reduction of channel opening frequency. Brain Res. 489, 190 (1989)                                                                                                               |
| 13       | A10           | P-233  | 190383-31-4 | 450.50                | PD 168,077 maleate                       | N-[4-(2-Cyanophenyl)-1-piperaziny]methyl-3-methylbenzamide maleate                                       | Dopamine           |        | Agonist    | D4                  | Yes                 | >10 mg/ml          | Glase, S., et al., Substituted [(4-Phenylpiperaziny)-methyl]benzamides: Selective dopamine D4 agonists. J. Med. Chem. 40, 1771-1772 (1997)                                                                                                                                |
| 13       | A11           | Q 3251 | 69-05-6     | 472.89                | Quinacrine dihydrochloride               |                                                                                                          | Neurotransmission  | Enzyme | Inhibitor  | MAO                 |                     |                    | Saravanamuthu A., et al., J Biol Chem. 2004 Jul 9;279(28):29493-500. Epub 2004 Apr 21                                                                                                                                                                                     |
| 13       | B02           | P 6777 | 156-51-4    | 234.28                | Phenelzine sulfate                       |                                                                                                          | Neurotransmission  | Enzyme | Inhibitor  | MAO-A/B             |                     |                    | Roh, J.H., et al., Purification, characterization, and crystallization of monoamine oxidase from Escherichia coliK-12. Biosci. Biotechnol. Biochem. 58, 1652 (1994)                                                                                                       |

| Rack No. | Rack Position | CATNUM | CAS number  | Mol. Weight Structure | Name                            | Secondary Name                                                                                            | Class              | Enzyme | Action     | Selectivity       | Solubility in Water | Solubility in DMSO | Reference                                                                                                                                                                                                                    |
|----------|---------------|--------|-------------|-----------------------|---------------------------------|-----------------------------------------------------------------------------------------------------------|--------------------|--------|------------|-------------------|---------------------|--------------------|------------------------------------------------------------------------------------------------------------------------------------------------------------------------------------------------------------------------------|
| 13       | B03           | P 7505 | 333-93-7    | 161.08                | Putrescine dihydrochloride      | Putrescine dihydrochloride                                                                                | Glutamate          |        | Agonist    | NMDA-Polyamine    |                     |                    | Volkow, et al., Labeled putrescine as a probe in brain tumors. <i>Science</i> 221, 673 (1983)                                                                                                                                |
| 13       | B04           | P 8293 | 553-12-8    | 562.67                | Protoporphyrin IX disodium      | Kammerer's porphyrin                                                                                      | Cyclic Nucleotides | Enzyme | Activator  | Guanylyl cyclase  |                     |                    | Wolin, M.S., et al., <i>J. Biol. Chem.</i> 257, 13312 (1982)                                                                                                                                                                 |
| 13       | B05           | P 8813 | 1225-55-4   | 299.85                | Protriptyline hydrochloride     |                                                                                                           | Adrenoceptor       |        | Blocker    | Reuptake          | Yes                 | 50 mg/ml           | Huang, Y., Inhibitory effect of noradrenaline uptake inhibitors on contractions of rat aortic smooth muscle <i>Br. J. Pharmacol.</i> 117, 533-539 (1996)                                                                     |
| 13       | B06           | P 9297 | 1263-89-4   | 713.72                | Paromomycin sulfate             |                                                                                                           | Antibiotic         |        |            | Protein synthesis |                     |                    | Borokow G, et al., <i>Antiviral Res.</i> 2003 Nov;60(3):181-92                                                                                                                                                               |
| 13       | B07           | P-101  |             | 358.36                | 2-Phenylaminoadenosine          | CV-1808                                                                                                   | Adenosine          |        | Agonist    | A2 > A1           | Insoluble           |                    | Taylor, et al., Interaction of 2-phenylaminoadenosine (CV 1808) with adenosine systems in rat tissues. <i>Eur. J. Pharmacol.</i> 85, 335-338 (1982)                                                                          |
| 13       | B08           | P-119  | 106469-51-6 | 480.45                | (±)-Pindobind                   | N8-Bromoacetyl-N1-3'-(4-indolyloxy)-2'-hydroxy-propyl-[Z]-1,8-diamino-p-methane                           | Adrenoceptor       |        | Ligand     | beta              |                     |                    | Pitha, J., et al., Affinity labels for adrenoceptors: Preparation and properties of alkylating-blockers derived from indole. <i>J. Med. Chem.</i> 30, 612-615 (1987)                                                         |
| 13       | B09           | P-178  | 149017-66-3 | 599.31                | PPADS                           | Pyridoxal-phosphate-6-azophenyl-2',4'-disulphonic acid tetrasodium                                        | P2 Receptor        |        | Antagonist | P2                | Yes                 | >10 mg/ml          | Lambrecht, et al., PPADS a novel functionally selective antagonist of P2 purinoceptor-mediated responses <i>Eur. J. Pharmacol.</i> 217, 217 (1992)                                                                           |
| 13       | B10           | S 9692 | 330161-87-0 | 371.46                | SU 6656                         | 2,3-Dihydro-N,N-dimethyl-2-oxo-3-[(4,5,6,7-tetrahydro-1H-indol-2-yl)methylene]-1H-indole-5-sulfonamide    | Phosphorylation    | Enzyme | Inhibitor  | Src family kinase |                     |                    | Blake, R.A., et al., SU6656, a selective Src family kinase inhibitor, used to probe growth factor signaling <i>Mol. Cell. Biol.</i> 20, 9018-9027 (2000)                                                                     |
| 13       | B11           | Q 3504 | 70018-51-8  | 235.67                | Quazinone                       | Ro 13-6438                                                                                                | Cyclic Nucleotides | Enzyme | Inhibitor  | PDE III           |                     |                    | Rupert, D., et al., <i>Life Sci.</i> 31, 2037 (1982)                                                                                                                                                                         |
| 13       | C02           | P 6902 | 132-20-7    | 356.43                | Pheniramine maleate             |                                                                                                           | Histamine          |        | Antagonist | H1                |                     |                    | Karadag, C.H., et al., The role of histamine H1-receptors in the anticonvulsive effect of morphine against maximal electroconvulsive shock in mice <i>Jpn. J. Pharmacol.</i> 71, 109-112 (1996)                              |
| 13       | C03           | P 7561 | 65-28-1     | 377.47                | Phentolamine mesylate           | Regitin mesylate                                                                                          | Adrenoceptor       |        | Antagonist | alpha             | Yes                 | 50 mg/ml           | McPherson, G.A., and Angus, J.A., Phentolamine and structurally related compounds selectively antagonize the vascular actions of the K <sup>+</sup> -channel opener, cromakalim. <i>Br. J. Pharmacol.</i> 97, 941-949 (1989) |
| 13       | C04           | P 8352 | 157254-60-9 | 444.26                | 1,4-PBIT dihydrobromide         | 1,4-Phenylene-bis(1,2-ethanediy)bis-isothiourea                                                           | Nitric Oxide       | Enzyme | Inhibitor  | NOS               |                     |                    | Garvey, E.P., Potent and selective inhibition of human nitric oxide synthases. Inhibition by non-amino acid isothioureas <i>J. Biol. Chem.</i> 269, 26669 (1994)                                                             |
| 13       | C05           | P 8828 | 66104-23-2  | 410.60                | Pergolide methanesulfonate      | 8-[(Methylthio)methyl]-6-propylergoline methanesulfonate                                                  | Dopamine           |        | Agonist    | D2/D1             | Insoluble           |                    | Barone, et al., Pergolide monotherapy in the treatment of early PD: a randomized, controlled study. Pergolide Monotherapy Study Group. <i>Neurology</i> 53, 573-579 (1999)                                                   |
| 13       | C06           | P 9375 | 5144-89-8   | 180.21                | 1,10-Phenanthroline monohydrate | o-Phenanthroline monohydrate                                                                              | Biochemistry       | Enzyme | Inhibitor  | Metalloprotease   |                     |                    | Santiago, T.C. et al., The relationship between mRNA stability and length in <i>Saccharomyces cerevisiae</i> . <i>Nucl. Acids Res.</i> 14, 8347 (1986)                                                                       |
| 13       | C07           | P-102  | 85976-54-1  | 255.79                | R(+)-3PPP hydrochloride         | R(+)-3-(3-Hydroxyphenyl)-N-propylpiperidine hydrochloride                                                 | Dopamine           |        | Agonist    | D2                | Yes                 | 150 mg/ml          | Tokuyama, S., et al., Sigma ligands stimulate GTPase activity in mouse prefrontal membranes: evidence for the existence of metabotropic sigma receptor. <i>Neurosci. Lett.</i> 233, 141-144 (1997)                           |
| 13       | C08           | P-120  |             | 177.21                | 1-Phenylbiguanide               | N-Phenyl-imidocarbonimidic diamide                                                                        | Serotonin          |        | Agonist    | 5-HT3             | Yes                 |                    | Mair, I.D., et al., Pharmacological characterization of a rat 5-hydroxytryptamine type 3 receptor subunit (5-HT3A(b)) expressed in <i>Xenopus laevis</i> oocytes. <i>Br. J. Pharmacol.</i> 124, 1667-1674 (1998)             |
| 13       | C09           | P-183  | 123671-92-1 | 285.77                | S(+)-PD 128,907 hydrochloride   | S(+)-(4aR,10bR)-3,4,4a,10b-Tetrahydro-4-propyl-2H,5H-[1]benzopyrano-[4,3-b]-1,4-oxazin-9-ol hydrochloride | Dopamine           |        | Agonist    | D3                | Yes                 | 9.0 mg/ml          | Sautel, et al., A functional test identifies dopamine agonists selective for D3 versus D2 receptors. <i>Neuroreport</i> 6, 329 (1995)                                                                                        |
| 13       | C10           | P63204 | 89-00-9     | 167.12                | Quinolinic acid                 | Pyridine-2,3-dicarboxylic acid                                                                            | Glutamate          |        | Antagonist | NMDA              |                     |                    | <i>Arch. Int. Physiol., Biochim. Biophys.</i> 99, 237 (1991)                                                                                                                                                                 |
| 13       | C11           | Q-102  | 85798-08-9  | 255.79                | (-)-Quinpirole hydrochloride    | LY-171,555                                                                                                | Dopamine           |        | Agonist    | D2/D3             | Yes                 | 7.3 mg/ml          | Rosenzweig-Lipson, S., and Barrett, J.E., K-Channel blockers attenuate the presynaptic effects of the D2/D3 agonist quinpirole in monkeys <i>Pharmacol. Biochem. Behav.</i> 51, 843-848 (1995)                               |

| Rack No. | Rack Position | CATNUM | CAS number  | Mol. Weight Structure | Name                                           | Secondary Name                                                                             | Class              | Enzyme | Action     | Selectivity              | Solubility in Water | Solubility in DMSO | Reference                                                                                                                                                                                                                     |
|----------|---------------|--------|-------------|-----------------------|------------------------------------------------|--------------------------------------------------------------------------------------------|--------------------|--------|------------|--------------------------|---------------------|--------------------|-------------------------------------------------------------------------------------------------------------------------------------------------------------------------------------------------------------------------------|
| 13       | D02           | P 6909 | 4408-78-0   | 140.03                | Phosphonoacetic acid                           |                                                                                            | DNA                | Enzyme | Inhibitor  | DNA Polymerase           |                     |                    | Shirokova E.A., et al. J Med Chem. 2004 Jul;147(14):3606-14                                                                                                                                                                   |
| 13       | D03           | P 7780 | 7681-67-6   | 376.95                | Propionylpromazine hydrochloride               |                                                                                            | Dopamine           |        | Antagonist | D2                       |                     |                    | Cooper J., et al., Analyst. 2004 Feb;129(2):169-74. Epub 2004 Jan 06                                                                                                                                                          |
| 13       | D04           | P 8386 | 50-33-9     | 308.38                | Phenylbutazone                                 |                                                                                            | Prostaglandin      | Enzyme | Substrate  | Prostaglandin peroxidase |                     |                    | Hughes, M.F. et al., Prostaglandin hydroperoxidase-dependent oxidation of phenylbutazone: relationship to inhibition of prostaglandin cyclooxygenase. Mol. Pharmacol. 34, 186 (1988)                                          |
| 13       | D05           | P 8852 | 1015-89-0   | 195.22                | 6(5H)-Phenanthridinone                         |                                                                                            | Transcription      | Enzyme | Inhibitor  | PARP                     |                     |                    | Weltin, D., et al., Effect of 6(5H)-phenanthridinone, an inhibitor of poly(ADP-ribose) polymerase, on cultured tumor cells. Oncol. Res. 6, 399-403 (1994)                                                                     |
| 13       | D06           | P 9391 | 614-39-1    | 271.79                | Procainamide hydrochloride                     |                                                                                            | Na+ Channel        |        | Antagonist |                          | Yes                 |                    | Bailey, D.N., et al., J. Anal. Toxicol. 23, 173 (1999)                                                                                                                                                                        |
| 13       | D07           | P-103  | 88768-67-6  | 255.79                | S(-)-3PPP hydrochloride                        | Preclamol hydrochloride                                                                    | Dopamine           |        | Agonist    | D2                       | Yes                 | 150 mg/ml          | Hjorth, et al., Central dopamine receptor agonist and antagonist actions of the enantiomers of 3-PPP Psychopharmacology 81, 89-99 (1983)                                                                                      |
| 13       | D08           | S 3317 | 115344-47-3 | 284.32                | SKF 94836                                      | N-Cyano-N'-methyl-N''-[4-(1,4,5,6-tetrahydro-4-methyl-6-oxo-3-pyridazinyl)phenyl]guanidine | Calcium Signaling  | Enzyme | Inhibitor  | PDE III                  |                     |                    | Tang, K.M., et al., Photoaffinity labelling of cyclic GMP-inhibited phosphodiesterase III (PDE III) in human and rat platelets and rat tissues: effect of phosphodiesterase inhibitors Eur. J. Pharmacol. 268, 153-161 (1994) |
| 13       | D09           | P-203  | 2038-35-9   | 401.83                | Phenamyl methanesulfonate                      | 3,5-Diamino-6-chloro-N-[imino(phenylamino)methyl]-pyrazinecarboxamide methansulfonate      | Na+ Channel        |        | Inhibitor  | Amiloride sensitive      | Insoluble           |                    | Garvin, et al., Phenamil: An irreversible inhibitor of sodium channels in the toad urinary bladder. J. Membr. Biol. 87, 45 (1985)                                                                                             |
| 13       | D10           | Q 0125 | 6151-25-3   | 302.24                | Quercetin dihydrate                            | 3,3',4',5',7-Pentahydroxyflavone dihydrate                                                 | Cyclic Nucleotides | Enzyme | Inhibitor  | PDE                      |                     |                    | Bowman, B.J., et al., Effects of inhibitors on the plasma membrane and mitochondrial adenosine triphosphatases of Neurospora crassa. Biochim. Biophys. Acta 512, 13-28 (1978)                                                 |
| 13       | D11           | Q-107  | 28614-26-8  | 459.46                | Quipazine, N-methyl-, dimaleate                | 2-[1-(4-Methyl)-piperazinyl]quinoline dimaleate                                            | Serotonin          |        | Agonist    | 5-HT3                    | Yes                 |                    | Glennon, R.A., et al., Binding of arylpiperazines to 5-HT serotonin receptors: Results of a structure-affinity study Eur. J. Pharmacol. 168, 387-392 (1989)                                                                   |
| 13       | E02           | P 7083 | 23635-14-5  | 166.22                | (-)-Perillic acid                              | 4-Isopropenyl-1-cyclohexene-1-carboxylic acid                                              | G protein          |        | Inhibitor  | p21 Ras                  |                     |                    | Crowell, P.L., et al., J. Biol. Chem. 266, 17679 (1991)                                                                                                                                                                       |
| 13       | E03           | P 7791 | 19237-84-4  | 419.87                | Prazosin hydrochloride                         |                                                                                            | Adrenoceptor       |        | Antagonist | alpha1                   | Yes                 | 0.5 mg/ml          | Honner, V. and Docherty, J.R., Investigation of the subtypes of alpha1-adrenoceptor mediating contractions of rat vas deferens Br. J. Pharmacol. 128, 1323-1331 (1999)                                                        |
| 13       | E04           | P 8477 | 32828-81-2  | 376.42                | Picotamide                                     | 4-Methoxy-N,N-bis(3-pyridinylmethyl)-1,3-benzenedicarboxamide                              | Thromboxane        |        | Antagonist | TXA2                     |                     |                    | Modesti, R.A., et al., Eur. J. Pharmacol. 169, 85 (1989)                                                                                                                                                                      |
| 13       | E05           | P 8887 | 516-54-1    | 318.50                | 5alpha-Pregnan-3alpha-ol-20-one                | Allopregnan-3alpha-ol-20-one                                                               | GABA               |        | Modulator  | GABA-A                   |                     |                    | Bitran, et al., Anxiolytic effects of 3a-hydroxy-5a(b)-pregnan-20-one: endogenous metabolites of progesterone that are active at the GABA(A)receptor Brain Res. 561, 157 (1991)                                               |
| 13       | E06           | P 9547 | 1786-81-8   | 256.78                | Prilocaine hydrochloride                       | N-(2-Methylphenyl)-2-(propylamino)propanamide hydrochloride                                | Na+ Channel        |        | Blocker    |                          |                     |                    | Nakamura, K., et al., Prilocaine induces apoptosis in osteoblastic cells. Can. J. Anaesth. 46, 476-482 (1999)                                                                                                                 |
| 13       | E07           | P-105  | 101403-00-3 | 345.92                | (±)-PPHT hydrochloride                         | (±)-2-(N-Phenylethyl)-N-propylamino-5-hydroxytetralin hydrochloride                        | Dopamine           |        | Agonist    | D2                       | Insoluble           |                    | Seeman, et al., Dopamine D2receptor binding sites for agonists: A tetrahedral model. Mol. Pharmacol. 28, 391 (1985)                                                                                                           |
| 13       | E08           | P-126  | 75444-65-4  | 393.47                | Pirenperone                                    | R-47,465                                                                                   | Serotonin          |        | Antagonist | 5-HT2                    |                     |                    | Walker, M. J., et al., Effects of acute selective 5-HT1, 5-HT2, 5-HT3 receptor and alpha 2 adrenoceptor blockade on naloxone-induced antinociception Psychopharmacology 113, 527-533 (1994)                                   |
| 13       | E09           | P-204  |             | 335.30                | Phenylbenzene-omega-phosphono-alpha-amino acid | PMBA                                                                                       | Glycine            |        | Antagonist |                          | Yes                 | 0.15 mg/ml         | Saitoh, et al., A novel antagonist phenylbenzenew-phosphono-a-amino acid for strychnine-sensitive glycine receptors in the rat spinal cord. Br. J. Pharmacol. 113, 165-170 (1994)                                             |
| 13       | E10           | Q 0875 | 6591-63-5   | 746.93                | Quinidine sulfate                              |                                                                                            | Na+ Channel        |        | Antagonist |                          |                     |                    | Tsujimae K, et al., Eur J Pharmacol. 2004 Jun 16;493(1-9):29-40                                                                                                                                                               |

| Rack No. | Rack Position | CATNUM | CAS number  | Mol. Weight Structure | Name                                  | Secondary Name                                                                        | Class             | Enzyme | Action     | Selectivity               | Solubility in Water   | Solubility in DMSO | Reference                                                                                                                                                                                                                                                                                                                              |
|----------|---------------|--------|-------------|-----------------------|---------------------------------------|---------------------------------------------------------------------------------------|-------------------|--------|------------|---------------------------|-----------------------|--------------------|----------------------------------------------------------------------------------------------------------------------------------------------------------------------------------------------------------------------------------------------------------------------------------------------------------------------------------------|
| 13       | E11           | Q-109  | 77372-73-7  | 374.36                | Quipazine, 6-nitro-, maleate          | 6-Nitro-2-(1-piperazinyl)-quinoline maleate                                           | Serotonin         |        | Inhibitor  | Reuptake                  | Yes                   | 5.0 mg/ml          | Classen, K., et al., Effects of DU 24565 (6-nitroquipazine) on serotonergic and noradrenergic neurones of the rat brain and comparison with the effects of quipazine. Naunyn-Schmiedeberg's Arch. Pharmacol. 326, 198 (1984)                                                                                                           |
| 13       | F02           | P 7136 | 98-96-4     | 123.12                | Pyrazinecarboxamide                   | Pyrazinoic acid amide; pyrazinamide; PZA                                              | Antibiotic        |        |            |                           |                       |                    | Goldstein, O., et al., J Biol Chem. 1993 Apr 15;268(11):7856-62                                                                                                                                                                                                                                                                        |
| 13       | F03           | P 7912 | 60-82-2     | 274.28                | Phloretin                             | 3-(4-Hydroxyphenyl)-1-(2,4,6-trihydroxyphenyl)-1-propanone                            | Ca2+ Channel      |        | Blocker    | L-Type                    |                       |                    | Mizuma, T. and Awazu, S., Biochim. Biophys. Acta 1425, 398 (1998)                                                                                                                                                                                                                                                                      |
| 13       | F04           | P 8511 | 1986-47-6   | 169.66                | Tranlycypromine hydrochloride         | (±)-trans-2-Phenylcyclopropylamine hydrochloride                                      | Neurotransmission | Enzyme | Inhibitor  | MAO                       |                       |                    | Green, A.R., and Youdin, M.B., Br J Pharmacol. 1975 Nov;55(3):415-22                                                                                                                                                                                                                                                                   |
| 13       | F05           | P 8891 | 50-34-0     | 448.40                | Propantheline bromide                 | (2-Hydroxyethyl)diisopropylmethylammonium bromide xanthene-9-carboxylate bromide      | Cholinergic       |        | Antagonist | Muscarinic                | Yes                   | 50 mg/ml           | Alaranta, S., et al., Inhibition of nicotine-induced relaxation of the bovine retractor penis muscle by compounds known to have ganglion-blocking properties. Br. J. Pharmacol. 101, 472-476 (1990)                                                                                                                                    |
| 13       | F06           | P 9689 | 55242-55-2  | 306.37                | Propentofylline                       | HWA 285                                                                               | Adenosine         |        | Inhibitor  | Transporter               | Yes                   | 12.4 mg/ml         | Nitta, et al., Behav. Brain Res. 83, 201-204 (1997)                                                                                                                                                                                                                                                                                    |
| 13       | F07           | P-106  | 30011-36-0  | 167.64                | 3-Phenylpropargylamine hydrochloride  |                                                                                       | Dopamine          | Enzyme | Inhibitor  | Dopamine beta-hydroxylase | Yes                   |                    | Padgett, et al., Olefin oxygenation and N-dealkylation by dopaminergic-monoxygenase: Catalysis and mechanism-based inhibition. Biochemistry 24, 5826 (1985)                                                                                                                                                                            |
| 13       | F08           | I 0658 | 186611-52-9 | 311.34                | IC 261                                | 1,3-Dihydro-3-[(2,4,6-trimethoxyphenyl)methylene]-2H-indol-2-one                      | Phosphorylation   | Enzyme | Inhibitor  | CK-1delta/epsilon         |                       |                    | Mashhoon, N., et al, Crystal structure of a conformation-selective casein kinase-1 inhibitor J. Biol. Chem. 275, 20052-20060 (2000)                                                                                                                                                                                                    |
| 13       | F09           | P-209  | 120-89-8    | 361.20                | Phthalamoyl-L-glutamic acid trisodium | PhGA                                                                                  | Glutamate         |        | Agonist    | NMDA                      |                       |                    |                                                                                                                                                                                                                                                                                                                                        |
| 13       | F10           | Q 1004 | 5786-68-5   | 445.43                | Quipazine dimaleate                   | 2-(1-Piperazinyl)quinoline dimaleate                                                  | Serotonin         |        | Agonist    |                           | Yes                   |                    | Zgombick, J.M., et al., Pharmacological characterizations of recombinant human 5-HT1D alpha and 5-HT1D beta receptor subtypes coupled to adenylate cyclase inhibition in clonal cell lines: apparent differences in drug intrinsic efficacies between human 5-HT1D subtypes Naunyn-Schmiedeberg's Arch. Pharmacol. 354, 226-236 (1996) |
| 13       | F11           | Q-110  | 97548-97-5  | 319.28                | Quinelorane dihydrochloride           | LY-163,502                                                                            | Dopamine          |        | Agonist    | D2                        | Yes                   | >10 mg/ml          | Charles, M.A., Effects of LY163,502, a D2dopaminergic agonist, on the sexual behavior of male rats. Pharmacol. Biochem. Behav. 43, 1087 (1992)                                                                                                                                                                                         |
| 13       | G02           | P 7295 | 125-33-7    | 218.26                | Primidone                             |                                                                                       | Anticonvulsant    |        |            |                           |                       |                    | Loscher, W., et al., Eur J Pharmacol. 1989 Mar 21;162(2):309-22                                                                                                                                                                                                                                                                        |
| 13       | G03           | P 8013 | 306-07-0    | 195.69                | Pargyline hydrochloride               | N-Methyl-N-2-propynylbenzylamine hydrochloride                                        | Neurotransmission | Enzyme | Inhibitor  | MAO-B                     |                       |                    | Taylor, J.D., et al., Nature 187, 941 (1960)                                                                                                                                                                                                                                                                                           |
| 13       | G04           | P 8688 | 4199--10--4 | 295.81                | (S)-Propranolol hydrochloride         | (S)-1-Isopropylamino-3-(1-naphthyl-2-hydroxy)-2-propanol hydrochloride                | Adrenoceptor      |        | Blocker    | beta                      | Yes                   | 50 mg/ml           | Goodwin, G.M., and Green, A.R., A behavioural and biochemical study in mice and rats of putative selective agonists and antagonists for 5-HT1 and 5-HT2 receptors. Br. J. Pharmacol. 84, 743-753 (1985)                                                                                                                                |
| 13       | G05           | P 9159 | 72450-62-5  | 165.21                | Piperidine-4-sulphonic acid           | P4S                                                                                   | GABA              |        | Agonist    | GABA-A                    |                       |                    | Krosgaard-Larsen, Piperidine-4-sulphonic acid, a new specific GABA agonist. J. Neurochem. 34, 756 (1980)                                                                                                                                                                                                                               |
| 13       | G06           | P 9708 | 107381-36-2 | 377.92                | (S)-(-)-propafenone hydrochloride     | (S)-1-(2-[2-Hydroxy-3-(propylamino)propoxy]phenyl)-3-phenyl-1-propanone hydrochloride | Adrenoceptor      |        | Blocker    | beta                      |                       |                    | Candinas, R., et al., Eur. J. Clin. Pharmacol. 50, 185 (1991)                                                                                                                                                                                                                                                                          |
| 13       | G07           | P-107  | 20125-39-7  | 371.40                | N6-2-Phenylethyladenosine             |                                                                                       | Adenosine         |        | Agonist    | A1                        | Very Slightly slouble |                    | Kusachi, Dog coronary artery adenosine receptor: Structure of the N6-alkyl subregion. J. Med. Chem. 38, 1636 (1985)                                                                                                                                                                                                                    |
| 13       | G08           | P-152  | 26328-11-0  | 248.33                | S(-)-Pindolol                         |                                                                                       | Serotonin         |        | Agonist    | 5-HT1A                    | Insoluble             |                    | Watkins, D.J., et al., Loss of [125I]-pindolol binding to beta-adrenoceptors on rat nodose ganglion after chronic isoprenaline treatment. J. Auton. Nerv. Syst. 60, 12-16 (1996)                                                                                                                                                       |

| Rack No. | Rack Position | CATNUM | CAS number  | Mol. Weight Structure | Name                                                                     | Secondary Name                                                                    | Class             | Enzyme | Action     | Selectivity               | Solubility in Water | Solubility in DMSO | Reference                                                                                                                                                                                                                             |
|----------|---------------|--------|-------------|-----------------------|--------------------------------------------------------------------------|-----------------------------------------------------------------------------------|-------------------|--------|------------|---------------------------|---------------------|--------------------|---------------------------------------------------------------------------------------------------------------------------------------------------------------------------------------------------------------------------------------|
| 13       | G09           | P-215  | 167869-21-8 | 267.29                | PD 98,059                                                                | 2-(2-Amino-3-methoxyphenyl)-4H-1-benzopyran-4-one                                 | Phosphorylation   | Enzyme | Inhibitor  | MEK2                      | Insoluble           |                    | Alessi, et al., PD 098059 is a specific inhibitor of the activation of mitogen-activated protein kinase kinase <i>in vitro</i> and <i>in vivo</i> . J. Biol. Chem. 270, 27489-27494 (1995)                                            |
| 13       | G10           | Q 1250 | 6119-70-6   | 746.93                | Quinine sulfate                                                          |                                                                                   | K+ Channel        |        | Antagonist |                           | Slightly Soluble    | 1.2 mg/ml          | Clement, E.M., et al., Neuropharmacology 37, 945 (1998)                                                                                                                                                                               |
| 13       | G11           | Q-111  | 73625-62-4  | 292.25                | (±)-Quinpirole dihydrochloride                                           | LY-141,865                                                                        | Dopamine          |        | Agonist    | D2 > D3                   | Yes                 | 28 mg/ml           | Eilam, D., Szechtman, H., Biphasic effect of D2 agonist quinpirole on locomotion and movements Eur. J. Pharmacol. 161, 151-157 (1989)                                                                                                 |
| 13       | H02           | P 7340 | 80938-69-8  | 427.03                | (±)-threo-1-Phenyl-2-decanoylamino-3-morpholino-1-propanol hydrochloride | PDMP hydrochloride                                                                | Sphingolipid      | Enzyme | Inhibitor  | Glucosylceramide synthase |                     |                    | Inokuchi, et al., Effects of D-threo-PDMP, an inhibitor of glucosylceramide synthetase, on expression of cell surface glycolipid antigen and binding to adhesive proteins by B16 melanoma cells. J. Cell Physiol. 141, 573-583 (1989) |
| 13       | H03           | P 8139 | 16561-29-8  | 616.84                | Phorbol 12-myristate 13-acetate                                          | PMA                                                                               | Phosphorylation   | Enzyme | Activator  | PKC                       |                     |                    | Schmidt, R., and Hecker, E., Autoxidation of phorbol esters under normal storage conditions. Cancer Res. 35, 1375-1377 (1975)                                                                                                         |
| 13       | H04           | P 8765 | 5108-96-3   | 164.29                | Ammonium pyrrolidinedithiocarbamate                                      | APDC                                                                              | Nitric Oxide      | Enzyme | Modulator  | NOS                       |                     |                    | Sherman, M. P., et al., Pyrrolidine dithiocarbamate inhibits induction of nitric oxide synthase activity in rat alveolar macrophages. Biochem. Biophys. Res. Comm. 191, 1301-1308 (1993)                                              |
| 13       | H05           | P 9178 | 84-02-6     | 606.10                | Prochlorperazine dimaleate                                               |                                                                                   | Dopamine          |        | Antagonist |                           | Slightly Soluble    | 0.3 mg/ml          | Lummis, S.C., Baker, J., Radioligand binding and photoaffinity labeling studies show a direct interaction of phenothiazines at 5-HT <sub>3</sub> receptors. Neuropharmacology 36, 665 (1997)                                          |
| 13       | H06           | P 9797 | 101-26-8    | 261.12                | Pyridostigmine bromide                                                   |                                                                                   | Cholinergic       | Enzyme | Inhibitor  | Cholinesterase            |                     |                    | Bernatova, I., et al., Pharmacol Biochem Behav. 2003 Mar;74(4):901-7                                                                                                                                                                  |
| 13       | H07           | P-108  |             | 343.34                | N6-Phenyladenosine                                                       |                                                                                   | Adenosine         |        | Agonist    | A1                        | Yes                 |                    | Dunwiddie, et al., Adenosine analogs mediating depressant effects of synaptic transmission in rat hippocampus: Structure-activity relationships for the N6subregion. Naunyn-Schmiedeberg's Arch. Pharmacol. 334, 77 (1986)            |
| 13       | H08           | P-154  | 85371-64-8  | 245.33                | Pinacidil                                                                | (±)-N-Cyano-N'-4-pyridinyl-N''-(1,2,2-trimethylpropyl)-guanidine                  | K+ Channel        |        | Activator  |                           | Insoluble           |                    | Gojkovic-Bukarica, L., et al., Differential effects of pinacidil and levromakalim on the contractions elicited electrically or by noradrenaline in the portal vein of the rabbit. Fundam. Clin. Pharmacol. 13, 527-534 (1999)         |
| 13       | H09           | P-216  | 123594-64-9 | 285.77                | (±)-PD 128,907 hydrochloride                                             | PD 125,530                                                                        | Dopamine          |        | Agonist    | D3                        | Yes                 | 9.0 mg/ml          | DeWald, et al., Synthesis and dopamine agonist properties of (+)-trans-3,4,4a,10b-tetrahydro-4-propyl-2H5H-[1]benzo pyranol[4,3-b]-oxazin-9-ol and its enantiomers. J. Med. Chem. 33, 445 (1990)                                      |
| 13       | H10           | Q 2128 | 52809-07-1  | 189.13                | (+)-Quisqualic acid                                                      | L(+)-alpha-Amino-3,5-dioxo-1,2,4-oxadiazolidine-2-propanoic acid                  | Glutamate         |        | Agonist    | AMPA                      | Yes                 | 0.5 mg/ml          | Boden, et al., The action of natural and synthetic isomers of quisqualic acid at a well-defined glutamatergic synapse. Brain Res. 385, 205 (1986)                                                                                     |
| 13       | H11           | R 0500 | 152-58-9    | 346.47                | Cortisolone                                                              | 11-Deoxycortisol                                                                  | Hormone           |        | Precursor  | Cortisol                  |                     |                    | Reichstein, T. and Shoppee, C.W., Vitam. Horm. 1, 346 (1943)                                                                                                                                                                          |
| 14       | A02           | R 0758 | 23239-51-2  | 323.82                | Ritodrine hydrochloride                                                  | N-(p-Hydroxyphenethyl)-4-hydroxynorephedrine hydrochloride                        | Adrenoceptor      |        | Agonist    | beta2                     |                     |                    | Bertini, S., et al., Effects of beta2-adrenoceptor agonist SR 58611A on gastric acid secretion and histamine release in the dog: comparison with ritodrine. Gen. Pharmacol. 31, 625-631 (1998)                                        |
| 14       | A03           | R 5523 | 101910-24-1 | 335.45                | REV 5901                                                                 | alpha-Pentyl-3-[2-quinolinylmethoxy]benzyl alcohol                                | Leukotriene       |        | Antagonist | LTD4                      |                     |                    | Van Inwegen, R.G., J. Pharmacol. Exp. Ther. 241, 117 (1987)                                                                                                                                                                           |
| 14       | A04           | R 8900 |             | 406.89                | Ro 8-4304                                                                | (4-[3-(4-[4-fluorophenyl]-3,6-dihydro-2H-pyridin-1-yl)-2-hydroxypropoxy]benzamide | Glutamate         |        | Antagonist | NMDA-NR2B                 | Yes                 | <0.5 mg/ml         | Ghelardini, C., et al., Drug Dev. Res. 40, 251-258 (1997)                                                                                                                                                                             |
| 14       | A05           | R-108  | 125628-97-9 | 277.21                | Ro 41-0960                                                               | 2'-Fluoro-3,4-dihydroxy-5-nitrobenzophenone                                       | Neurotransmission | Enzyme | Inhibitor  | COMT                      | Slightly Soluble    | <0.7 mg/ml         | Borgulya, et al., Catechol-O-methyltransferase-inhibiting pyrocatechol derivatives: Synthesis and structure-activity studies. Helv. Chim. Acta 72, 952 (1989)                                                                         |
| 14       | A06           | R-140  | 202466-68-0 | 381.29                | Ro 04-6790 dihydrochloride                                               | 4-Amino-N-[2,6-bis(methylamino)-4-pyrimidinyl]benzenesulfonamide dihydrochloride  | Serotonin         |        | Antagonist | 5-HT6                     | Yes                 | >10 mg/ml          | Sleight, A.J., et al., Characterization of Ro 04-6790 and Ro 63-0563: Potent and selective antagonists at human and rat 5-HT6 receptors Br. J. Pharmacol. 124, 556-562 (1998)                                                         |



| Rack No. | Rack Position | CATNUM | CAS number  | Mol. Weight Structure | Name                        | Secondary Name                                                                                          | Class                      | Enzyme | Action     | Selectivity          | Solubility in Water | Solubility in DMSO | Reference                                                                                                                                                                                     |
|----------|---------------|--------|-------------|-----------------------|-----------------------------|---------------------------------------------------------------------------------------------------------|----------------------------|--------|------------|----------------------|---------------------|--------------------|-----------------------------------------------------------------------------------------------------------------------------------------------------------------------------------------------|
| 14       | A07           | S 1441 |             | 612.75                | Cortexolone maleate         | N-(4-[4-(2-methoxyphenyl)-piperazin-1-yl]-butyl-5-(dimethylamino)-naphthalene-1-sulfonamide maleate     | Dopamine                   |        | Antagonist | D2                   |                     |                    | Weber, B. et al., Br. J. Pharmacol. 138, 1243 (2001)                                                                                                                                          |
| 14       | A08           | S 2501 | 334-50-9    | 254.63                | Spermidine trihydrochloride | N-(3-Aminopropyl)-1,4-butanediamine trihydrochloride                                                    | Glutamate                  |        | Ligand     | NMDA-Polyamine       |                     |                    | Cull, M., and McHenry, C.S., Preparation of extracts from prokaryotes Meth. Enzymol. 182, 147-153 (1990)                                                                                      |
| 14       | A09           | S 3313 | 148702-58-3 | 419.35                | SB 204070 hydrochloride     | 1-Butyl-4-piperidinylmethyl-8-amino-7-chloro-2,3-dihydro-1,4-benzodioxin-5-carboxylate hydrochloride    | Serotonin                  |        | Antagonist | 5-HT4                | Yes                 | 20 mg/ml           | Gaster, L.M. et al. J. Med. Chem. 36, 4121 (1993)                                                                                                                                             |
| 14       | A10           | S 6879 | 123-78-4    | 299.50                | Sphingosine                 | 4-Sphingenine                                                                                           | Phosphorylation            | Enzyme | Inhibitor  | PKC                  |                     |                    | Sachs, et al., Effects of sphingosine stereoisomers on P-glycoprotein phosphorylation and vinblastine accumulation in multidrug-resistant MCF-7 cells. Biochem. Pharmacol. 52, 603-612 (1996) |
| 14       | A11           | S 8010 | 15676-16-1  | 341.43                | (±)-Sulpiride               | (±)-5-(Aminosulfonyl)-N-[(1-ethyl-2-pyrrolidinyl)methyl]-2-methoxybenzamide                             | Dopamine                   |        | Antagonist | D2                   | Slightly Soluble    |                    | Hauber, W., and Lutz, S., Dopamine D1 or D2 receptor blockade in the globus pallidus produces akinesia in the rat Behav. Brain Res. 106, 143-150 (1999)                                       |
| 14       | B02           | R 1402 | 84449-90-1  | 510.06                | Raloxifene hydrochloride    | LY 139481                                                                                               | Hormone                    |        | Modulator  | ER                   | Insoluble           |                    | Fitzpatrick, S.L., Effect of estrogen agonists and antagonists on induction of progesterone receptor in a rat hypothalamic cell line. Endocrinology 140, 3928 (1999)                          |
| 14       | B03           | R 5648 | 82-08-6     | 516.55                | Rottlerin                   | Mallotoxin                                                                                              | Phosphorylation            | Enzyme | Inhibitor  | PKC / CaM Kinase III |                     |                    | Gschwendt, M., et al., Biochem. Biophys. Res. Comm. 199, 93 (1994)                                                                                                                            |
| 14       | B04           | R 9525 | 102575-24-6 | 270.72                | RX 821002 hydrochloride     | 2-[2-(2-Methoxy-1,4-benzodioxanyl)-imidazoline hydrochloride                                            | Adrenoceptor               |        | Antagonist | alpha2               |                     |                    | Galitzky, J. et al., Br. J. Pharmacol. 100, 862-866 (1990)                                                                                                                                    |
| 14       | B05           | R-115  | 12236-82-7  | 840.11                | Reactive Blue 2             | Basilen blue E-3G                                                                                       | P2 Receptor                |        | Antagonist | P2Y                  | Yes                 |                    | Inoue, et al., Antagonism by reactive blue 2 but not by brilliant blue G of extracellular ATP-evoked responses in PC12phaeochromocytoma cells Br. J. Pharmacol. 102, 851 (1991)               |
| 14       | B06           | S 0278 | 959-24-0    | 308.83                | (±)-Sotalol hydrochloride   | N-(4-[1-Hydroxy-2-(isopropylamino)ethyl]phenyl)methanesulfonamide hydrochloride                         | Adrenoceptor               |        | Antagonist | beta                 | Yes                 | 20 mg/ml           | Doggrell, S.A., The effects of (±)-, (+)-, and (-)-atenolol, sotalol, and amosulolol on the rat left atria and portal vein. Chirality 5, 8-14 (1993)                                          |
| 14       | B07           | S 1563 | 156727-74-1 | 232.15                | SKF 86466                   | 6-Chloro-2,3,4,5-tetrahydro-3-methyl-1H-3-benzazepine hydrochloride                                     | Adrenoceptor               |        | Antagonist | alpha2               | Yes                 | 24 mg/ml           | Tolentino-Silva, F.P. et al., J. Appl. Physiol. 89, 437-444 (2000)                                                                                                                            |
| 14       | B08           | S 2812 | 156727-74-1 | 449.64                | SNC80                       | (+)-4-[(alphaR)-alpha-(2S,5R)-4-Allyl-2,5-dimethyl-1-piperazinyl]-3-methoxybenzyl]-N,N-diethylbenzamide | Opioid                     |        | Agonist    | delta                | Yes                 |                    | Calderon, S.N. et al., J. Med. Chem. 40, 695-704 (1997)                                                                                                                                       |
| 14       | B09           | O 2139 | 105955-11-1 | 417.64                | N-Oleoyldopamine            | OLDA                                                                                                    | Neurotransmission          |        | Ligand     | CB1                  |                     |                    | Czarnocki, et al., Org. Prep. Proc. Int. 30, 699-702 (1998)                                                                                                                                   |
| 14       | B10           | S 7389 |             | 388.96                | SB 269970 hydrochloride     | [R]-3-[2-(2-[4-Methyl-piperidin-1-yl]ethyl)pyrrolidine-1-sulfonyl]phenol hydrochloride                  | Serotonin                  |        | Antagonist | 5-HT7                | Yes                 | 22 mg/ml           | Hagan, J.J. et al., Br. J. Pharmacol. 130(3), 539-48 (2000)                                                                                                                                   |
| 14       | B11           | C 7238 | 85703-73-7  | 592.78                | CV-3988                     | (+/-)-(3-(N-Octadecylcarbamoyloxy)-2-methoxy)propyl-2-thiazolioethyl phosphate                          | Cytokines & Growth Factors |        | Antagonist | PAF                  |                     |                    | Terashita, Z., et al, Inhibition by CV-3988 of the binding of [3H]-platelet activating factor (PAF) to the platelet Biochem. Pharmacol. 34, 1491-1495 (1985)                                  |
| 14       | C02           | R 2625 | 302-79-4    | 300.44                | Retinoic acid               | Vitamin A acid                                                                                          | Apoptosis                  | Enzyme | Activator  |                      |                     |                    | Napoli, J.L., Biochemical pathways of retinoid transport, metabolism, and signal transduction. Clin. Immunol. Immunopathol. 80, S52-S62 (1996)                                                |

| Rack No. | Rack Position | CATNUM | CAS number  | Mol. Weight Structure | Name                           | Secondary Name                                                                                                                                                                                         | Class              | Enzyme | Action     | Selectivity             | Solubility in Water | Solubility in DMSO | Reference                                                                                                                                                                                                                                                                           |
|----------|---------------|--------|-------------|-----------------------|--------------------------------|--------------------------------------------------------------------------------------------------------------------------------------------------------------------------------------------------------|--------------------|--------|------------|-------------------------|---------------------|--------------------|-------------------------------------------------------------------------------------------------------------------------------------------------------------------------------------------------------------------------------------------------------------------------------------|
| 14       | C03           | R 6152 |             | 500.47                | Ranolazine dihydrochloride     | N-(2,6-Dimethylphenyl)-4-[2-hydroxy-3-(2-methoxyphenoxy)propyl]-1-piperazineacetamide dihydrochloride; (±) 4-[2-hydroxy-3-(o-methoxyphenoxy)propyl]-1-piperazineacetate-2',6'-xylylide dihydrochloride | Lipid              | Enzyme | Inhibitor  | pFOX                    | Yes                 | 10 mg/ml           | Zacharowski, K., et al., Ranolazine, a partial fatty acid oxidation inhibitor, reduces myocardial infarct size and cardiac troponin T release in the rat. Eur. J. Pharmacol. 418, 105-110 (2001)                                                                                    |
| 14       | C04           | R 9644 | 36791-04-5  | 244.21                | Ribavirin                      | 1-beta-D-Ribofuranosyl-1,2,4-triazole-3-carboxamide                                                                                                                                                    | Cell Cycle         | Enzyme | Inhibitor  | IMP dehydrogenase       |                     |                    | Liao, H.J. and Stollar, V., Reversal of the antiviral activity of ribavirin against Sindbis virus in Ae. albopictus mosquito cells Antiviral Res. 22, 285-294 (1993)                                                                                                                |
| 14       | C05           | R-116  | 1744-22-5   | 234.20                | Riluzole                       | 2-Amino-6-(trifluoromethoxy)-benzothiazole                                                                                                                                                             | Glutamate          |        | Antagonist | Release                 | Insoluble           |                    | Samuel, et al., Effects of riluzole (2-amino-6-trifluoromethoxy benzothiazole) on striatal neurochemical markers in the rat, with special references to the dopamine, choline, GABA and glutamate synaptosomal high affinity uptake systems. Fundam. Clin. Pharmacol. 6, 177 (1992) |
| 14       | C06           | S 0441 |             | 287.75                | SB-366791                      | Vanilloid receptor-1 antagonist                                                                                                                                                                        | Vanilloid          |        | Antagonist | VR1                     |                     |                    | Gunthorpe, M.J., et al., Identification and characterisation of SB-366791, a potent and selective vanilloid receptor (VR1/TRPV1) antagonist. Neuropharmacology. 2004 Jan;46(1):133-49                                                                                               |
| 14       | C07           | S 1688 |             | 248.16                | SR 57227A                      | 4-amino-1-(6-chloro-2-pyridyl)-piperidine hydrochloride                                                                                                                                                | Serotonin          |        | Agonist    | 5-HT3                   | Yes                 | 9.0 mg/ml          | Bachy, A., et al., SR 57227A: a potent and selective agonist at central and peripheral 5-HT3 receptors in vitro and in vivo. Eur. J. Pharmacol. 237, 299 (1993)                                                                                                                     |
| 14       | C08           | S 2816 |             | 398.73                | SKF 83959 hydrobromide         | 6-chloro-7,8-dihydroxy-3-methyl-1-(3-methylphenyl)-2,3,4,5-tetrahydro-1H-3-benzazepine hydrobromide                                                                                                    | Dopamine           |        | Agonist    | D1                      | Insoluble           |                    |                                                                                                                                                                                                                                                                                     |
| 14       | C09           | S 3378 | 52-01-7     | 416.58                | Spironolactone                 |                                                                                                                                                                                                        | Hormone            |        | Antagonist | Mineralocorticoid       |                     |                    | Pitt, B., et al., New England J. Med. 341, 709 (1999)                                                                                                                                                                                                                               |
| 14       | C10           | S 7395 | 749-02-0    | 431.94                | Spiroperone hydrochloride      | R 5147 hydrochloride; Spiroperidol hydrochloride                                                                                                                                                       | Dopamine           |        | Antagonist | D2                      | Slightly Soluble    | 0.2 mg/ml          | Testa, R., et al., Mediation of noradrenaline-induced contractions of rat aorta by the 1B-adrenoceptor subtype Br. J. Pharmacol. 114, 745-750 (1995)                                                                                                                                |
| 14       | C11           | S 8139 | 38194-50-2  | 356.42                | Sulindac                       | (Z)-5-Fluoro-2-methyl-1-[(4-(methylsulfinyl)phenyl)methylene]-1H-indene-3-acetic acid                                                                                                                  | Prostaglandin      | Enzyme | Inhibitor  | COX                     |                     |                    | Smith, W.L., et al., Interactions of PGH synthase isozymes-1 and -2 with NSAIDs. Ann. N.Y. Acad. Sci. 744, 50 (1994)                                                                                                                                                                |
| 14       | D02           | R 2751 | 11103-72-3  | 786.36                | Ruthenium red                  | Ammoniated ruthenium oxychloride                                                                                                                                                                       | Ion Pump           |        | Inhibitor  | Mitochondrial uniporter |                     |                    | J.H.M. Charuk, Interaction with calcium-binding proteins. Anal. Biochem. 188, 123 (1990)                                                                                                                                                                                            |
| 14       | D03           | R 6520 | 61413-54-5  | 275.35                | Rolipram                       | ZK 62711                                                                                                                                                                                               | Cyclic Nucleotides | Enzyme | Inhibitor  | PDE IV                  | Yes                 | 0.2 mg/ml          | Zhu, W.H., et al., Cyclic AMP-specific phosphodiesterase inhibitor rolipram and RO-20-1724 promoted apoptosis in HL60 promyelocytic leukemia cells via cyclic AMP-independent mechanism. Life Sci. 63, 265-274 (1998)                                                               |
| 14       | D04           | R-101  | 66357-59-3  | 350.87                | Ranitidine hydrochloride       | Zantac                                                                                                                                                                                                 | Histamine          |        | Antagonist | H2                      | Yes                 | 1.8 mg/ml          | Bliss, P.W., et al., N-alpha-methyl histamine and histamine stimulate gastrin release from rabbit G-cells via histamine H2-receptors. Aliment. Pharmacol. Ther. 13, 1669 (1999)                                                                                                     |
| 14       | D05           | R-118  | 106266-06-2 | 410.50                | Risperidone                    | R 62 766                                                                                                                                                                                               | Dopamine           |        | Antagonist | D2                      | Insoluble           |                    | Assie, et al., Biphasic displacement of [3H]YM-09151-2 binding in the rat brain by thioridazine, risperidone and clozapine but not by other antipsychotics Eur. J. Pharmacol. 237, 183 (1993)                                                                                       |
| 14       | D06           | S 0501 | 13755-38-9  | 261.92                | Sodium nitroprusside dihydrate | Sodium nitroferricyanide                                                                                                                                                                               | Nitric Oxide       |        | Releaser   |                         |                     |                    | Brune, B., and Lapetina, E.G., Activation of a cytosolic ADP-ribosyltransferase by nitric oxide-generating agents J. Biol. Chem. 264, 8455-8458 (1989)                                                                                                                              |
| 14       | D07           | S 1875 | 114-49-8    | 384.27                | (-)-Scopolamine hydrobromide   | Hyoscyne hydrobromide                                                                                                                                                                                  | Cholinergic        |        | Antagonist | Muscarinic              | Yes                 | 50 mg/ml           | Rush, D.K., Scopolamine amnesia of passive avoidance: a deficit of information acquisition Behav. Neural Biol 50, 255-274 (1988)                                                                                                                                                    |

| Rack No. | Rack Position | CATNUM | CAS number  | Mol. Weight Structure | Name                        | Secondary Name                                                                                        | Class         | Enzyme | Action     | Selectivity     | Solubility in Water | Solubility in DMSO | Reference                                                                                                                                                                            |
|----------|---------------|--------|-------------|-----------------------|-----------------------------|-------------------------------------------------------------------------------------------------------|---------------|--------|------------|-----------------|---------------------|--------------------|--------------------------------------------------------------------------------------------------------------------------------------------------------------------------------------|
| 14       | D08           | S 2876 | 306-67-2    | 348.19                | Spermine tetrahydrochloride | N,N'-bis(3-Aminopropyl)-1,4-butanediamine tetrahydrochloride                                          | Glutamate     |        | Antagonist | NMDA-Polyamine  |                     |                    | Sacaan, A.I., and Johnson, K.M. Spermine enhances binding to the glycine site associated with the N-methyl-D-aspartate receptor complex Mol. Pharmacol. 36, 836-839 (1989)           |
| 14       | D09           | S 4063 |             | 348.27                | SCH-202676 hydrobromide     | N-(2,3-diphenyl-1,2,4-thiadiazol-5-(2H)-ylidene)methanamine hydrobromide                              | G protein     |        | Modulator  | GPCR            | Insoluble           |                    | Goerdeler, J., Eggers, W. Chem. Ber. 119, 3737 (1986)                                                                                                                                |
| 14       | D10           | S 7690 |             | 370.41                | SR 2640                     | 2-[[3-(2-Quinolylmethoxy)phenyl]amino]-benzoic acid; QMPB                                             | Leukotriene   |        | Antagonist | CysLT1          |                     |                    | Ahnfelt-Ronne, I., et al, A novel leukotriene D4/E4 antagonist, SR2640 (2-[3-(2-quinolylmethoxy)phenylamino]benzoic acid). Eur. J. Pharmacol. 155, 117-128 (1995)                    |
| 14       | D11           | S 8251 | 6101-15-1   | 361.31                | Succinylcholine chloride    |                                                                                                       | Cholinergic   |        | Antagonist | Nicotinic       | Yes                 |                    | Albrecht, et al., Masseter muscle rigidity and nondepolarizing neuromuscular blocking agents. Mayo Clin. Proc. 72, 329-332 (1997)                                                    |
| 14       | E02           | R 3255 | 4759-48-2   | 300.44                | 13-cis-retinoic acid        | Isotretinoin                                                                                          | Transcription |        | Regulator  | RAR-alpha, beta |                     |                    | Datta, P.K., and Lianos, E.A., Retinoic acids inhibit inducible nitric oxide synthase expression in mesangial cells Kidney Int. 56, 486-493 (1999)                                   |
| 14       | E03           | R 7150 |             | 375.94                | Ro 25-6981 hydrochloride    | (R-[R*, S*])-alpha-(4-Hydroxyphenyl)-beta-methyl-4-(phenylmethyl)-1-piperidinepropanol hydrochloride  | Glutamate     |        | Antagonist | NMDA-NR2B       | Yes                 | 2.0 mg/ml          | Fischer, G., et al., Ro 25-6981 a highly potent and selective blocker of N-methyl-D-aspartate receptors containing the NR2B subunit. J. Pharmacol. Exp. Ther. 283, 1285 (1997)       |
| 14       | E04           | R-103  | 87051-43-2  | 477.58                | Ritanserin                  | 6-[2-[4-bis(4-Fluorophenyl)methylene]-1-piperidinyl]ethyl]-7-methyl-5H-thiazolo[3,2-a]pyrimidin-5-one | Serotonin     |        | Antagonist | 5-HT2/5-HT1C    | Insoluble           |                    | Leysen, J.E., et al., Receptor-binding properties in vitro and in vivo of ritanserin, a very potent and long acting serotonin-S2antagonist. Mol. Pharmacol. 27, 600-611 (1985)       |
| 14       | E05           | R-121  | 98185-20-7  | 497.33                | S(+)-Raclopride L-tartrate  |                                                                                                       | Dopamine      |        | Antagonist | D2              | Yes                 | 89 mg/ml           | Kopp, et al., Effect of raclopride on dopamine D2receptor mRNA expression in rat brain. Neuroscience 47, 771-779 (1992)                                                              |
| 14       | E06           | S 0752 | 94-07-5     | 167.21                | (±)-Synephrine              | 4-hydroxy-alpha-(methylaminomethyl)benzyl alcohol                                                     | Adrenoceptor  |        | Agonist    | alpha           |                     |                    | Brown, C.M., et al., Activities of octopamine and synephrine stereoisomers on alpha-adrenoceptors Br. J. Pharmacol. 93, 417-429 (1988)                                               |
| 14       | E07           | S 2064 | 188817-13-2 | 352.75                | SC-560                      | 5-(4-Chlorophenyl)-1-(4-methoxyphenyl)-3-trifluoromethyl pyrazole                                     | Prostaglandin | Enzyme | Inhibitor  | COX-1           |                     |                    | Masferrer, J.L., Selective inhibition of inducible cyclooxygenase 2 in vivo is antiinflammatory and nonulcerogenic Proc. Natl. Acad. Sci. USA 91, 3228 (1994)                        |
| 14       | E08           | S 2941 |             | 350.26                | SKF 75670 hydrobromide      | 7,8-dihydroxy-3-methyl-1-phenyl-2,3,4,5-tetrahydro-1H-3-benzazepine hydrobromide                      | Dopamine      |        | Agonist    | D1              | Insoluble           |                    | Adachi, K. et al., Eur. J. Pharmacol. 367, 143-149 (1999)                                                                                                                            |
| 14       | E09           | S 4250 | 312-84-5    | 105.09                | D-Serine                    | R(-)-2-Amino-3-hydroxypropionic acid                                                                  | Glutamate     |        | Agonist    | NMDA-Glycine    |                     |                    | Brugger, et al., Modulation of NMDA receptor by D-serine in the cortex and the spinal cord in vitro Eur. J. Pharmacol. 191, 29 (1990)                                                |
| 14       | E10           | S 7771 | 23672-07-3  | 341.43                | (-)-Sulpiride               | (-)-5-Aminosulfonyl-N-[(1-ethyl-2-pyrrolidinyl)methyl]-2-methoxybenzamide                             | Dopamine      |        | Antagonist | D2              |                     |                    | Hauber, W., and Lutz, S., Dopamine D1 or D2 receptor blockade in the globus pallidus produces akinesia in the rat Behav. Brain Res. 106, 143-150 (1999)                              |
| 14       | E11           | S 8260 | 18559-94-9  | 239.32                | Salbutamol                  | Albuterol                                                                                             | Adrenoceptor  |        | Agonist    | beta2           |                     |                    | Handley, D., The asthma-like pharmacology and toxicology of (S)-isomers of beta-agonists J. Allergy Clin. Immunol. 104, S69-S76 (1999)                                               |
| 14       | F02           | R 3277 | 84-26-4     | 287.32                | Rutaecarpine                | Rutecarpine                                                                                           | K+ Channel    |        | Blocker    |                 | Yes                 | 18 mg/ml           | Wu, S.N., et al., Rutaecarpine-induced block of delayed rectifier K-current in NG108-15 neuronal cells. NMR Shift Reagents 41, 834 (2001)                                            |
| 14       | F03           | R 7385 | 119942-99-3 | 587.48                | Phosphoramidon disodium     | N-(alpha-Rhamnopyranosyloxyhydroxyphenyl)-Leu-Trp disodium                                            | Biochemistry  | Enzyme | Inhibitor  | Endopeptidase   | Yes                 |                    | Umezawa, H. Meth. Enzymol. 45, 678 (1976)                                                                                                                                            |
| 14       | F04           | R-104  | 6211-32-1   | 390.91                | Rauwolfscine hydrochloride  | alpha-Yohimbine hydrochloride                                                                         | Adrenoceptor  |        | Antagonist | alpha2          | Yes                 |                    | Perry, B.C., and U'Prichard, D.C., [3H]Rauwolfscine (alpha-yohimbine): a specific antagonist radioligand for brain alpha2-adrenergic receptors Eur. J. Pharmacol. 76, 461-464 (1981) |

| Rack No. | Rack Position | CATNUM | CAS number  | Mol. Weight Structure | Name                            | Secondary Name                                                                           | Class                 | Enzyme | Action     | Selectivity       | Solubility in Water | Solubility in DMSO | Reference                                                                                                                                                                                                                   |
|----------|---------------|--------|-------------|-----------------------|---------------------------------|------------------------------------------------------------------------------------------|-----------------------|--------|------------|-------------------|---------------------|--------------------|-----------------------------------------------------------------------------------------------------------------------------------------------------------------------------------------------------------------------------|
| 14       | F05           | S 4692 | 98631-95-9  | 514.54                | Sobuzoxane                      | 4,4'-(1,2-Ethanediy)bis(1-isobutoxycarbonyloxymethyl-2,6-piperazinedione)                | Gene Regulation       | Enzyme | Inhibitor  | Topo II           |                     |                    | Onishi, U., et al., bis(2,6-dioxipiperaxine) derivatives, topoisomerase II inhibitors which do not form a DNA cleavable complex, induce thymocyte apoptosis. <i>Biochem. Mol. Biol. Int.</i> 32, 115-122 (1994)             |
| 14       | F06           | S 0758 | 526-08-9    | 314.37                | Sulfaphenazole                  | 4-Amino-N-(1-phenyl-1H-pyrazol-5-yl)-benzenesulfonamide                                  | Multi-Drug Resistance | Enzyme | Inhibitor  | Cytochrome P4502C |                     |                    | Viswanathan, S., et al., <i>J Am Coll Nutr.</i> - 22, 502-510 (2003)                                                                                                                                                        |
| 14       | F07           | S 2201 | 563-41-7    | 111.53                | Semicarbazide hydrochloride     | Hydrazine carboxamide hydrochloride                                                      | Neurotransmission     | Enzyme | Inhibitor  | MAO               |                     |                    | Stolen, C. M., et al., <i>FASEB J.</i> 2004 Apr;18(6):702-4. Epub 2004 Feb 20                                                                                                                                               |
| 14       | F08           | S 3065 | 19395-87-0  | 331.76                | SC 19220                        | 2-acetylhydrazide 10(11H)-carboxylic acid                                                | Prostaglandin         |        | Antagonist | EP1               | Insoluble           |                    | DelToro, F. Jr., Characterization of prostaglandin E(2) receptors and their role in 24,25-(OH)(2)D(3)-mediated effects on resting zone chondrocytes. <i>J. Cell Physiol.</i> 182, 196 (2000)                                |
| 14       | F09           | S 5013 | 51022-70-9  | 576.71                | Albuterol hemisulfate           | Salbutamol hemisulfate                                                                   | Adrenoceptor          |        | Agonist    | beta2             |                     |                    | Handley, D., The asthma-like pharmacology and toxicology of (S)-isomers ofb-agonists <i>J. Allergy Clin. Immunol.</i> 104, S69-S76 (1999)                                                                                   |
| 14       | F10           | S 7809 | 130495-35-1 | 402.93                | SKF 96365                       | 1-(beta-[3-(4-Methoxyphenyl)propoxy]-4-methoxyphenethyl)-1H-imidazole hydrochloride      | Ca2+ Channel          |        | Inhibitor  |                   |                     |                    | Merritt, J.E., et al., <i>Biochem. J.</i> 271, 515 (1990)                                                                                                                                                                   |
| 14       | F11           | S 2692 |             | 415.58                | Salmeterol                      | (±) 4-Hydroxy-1-[[[6-(4-phenylbutoxy)hexylamino]methyl]-1,3-benzenedimethanol; GR 33343X | Adrenoceptor          |        | Agonist    | beta2             | Insoluble           |                    | January, B. et al., <i>Br. J. Pharmacol.</i> 123, 701-711 (1998)                                                                                                                                                            |
| 14       | G02           | R 4152 | 91374-20-8  | 296.84                | Ropinirole hydrochloride        | SKF 101468; 4-[2-(dipropylamino)ethyl]-1,3-dihydro-2H-indol-2-one hydrochloride          | Dopamine              |        | Agonist    | D2                | Yes                 | 15 mg/ml           | Tanaka, K. et al., <i>Neurochem. Res.</i> 26, 31-36 (2001)                                                                                                                                                                  |
| 14       | G03           | R 7772 | 186692-46-6 | 354.46                | Roscovitine                     | (R)-2-(1-Ethyl-2-hydroxyethylamino)-6-benzylamino-9-isopropylpurine                      | Phosphorylation       | Enzyme | Inhibitor  | CDK               |                     |                    | DeAzevedo, W.F., et al., Inhibition of cyclin-dependent kinases by purine analogues: crystal structure of human cdk2 complexed with roscovitine. <i>Eur. J. Biochem.</i> 243, 518-526 (1997)                                |
| 14       | G04           | R-106  | 94319-79-6  | 235.11                | Ro 16-6491 hydrochloride        | N-(2-Aminoethyl)-4-chlorobenzamide hydrochloride                                         | Neurotransmission     | Enzyme | Inhibitor  | MAO-B             | Yes                 |                    | Keller, et al., Short-acting novel MAO inhibitors: In vitro evidence for the reversibility of MAO inhibition by moclobemide and Ro 16-6491. <i>Naunyn-Schmiedeberg's Arch. Pharmacol.</i> 335, 12-6491 (1987)               |
| 14       | G05           | R-134  | 54187-04-1  | 180.25                | Rilmenidine hemifumarate        | N-(Dicyclopropylmethyl)-4,5-dihydro-2-oxazolamine; Oxaminozoline                         | Imidazoline           |        | Agonist    | I1                | Yes                 | 7.3 mg/ml          | Takada, K., et al., The involvement of pertussis toxin-sensitive G proteins in the post receptor mechanism of central I1-imidazoline receptors <i>Br. J. Pharmacol.</i> 120, 1575 (1997)                                    |
| 14       | G06           | S 1316 |             | 808.99                | Seglitide                       | MK 678                                                                                   | Somatostatin          |        | Agonist    | sst2              | Yes                 | 26 mg/ml           | Mitchell, S.N., <i>Eur J Pharmacol.</i> 200 Apr 21;395(1):43-6                                                                                                                                                              |
| 14       | G07           | S 2250 | 6106-46-3   | 380.40                | (-)-Scopolamine methyl nitrate  | Hyoscine methyl nitrate                                                                  | Cholinergic           |        | Antagonist | Muscarinic        |                     |                    | Partwee, et al., Drugs which stimulate or facilitate central cholinergic transmission interact synergistically with delta-9-tetrahydrocannabinol to produce marked catalepsy in mice <i>Neuropharmacology</i> 30, 67 (1991) |
| 14       | G08           | S 3066 |             | 328.23                | SKF 89626                       | 4-(3,4-dihydroxyphenyl)-4,5,6,7-tetrahydrothieno[2,3-c]pyridine                          | Dopamine              |        | Agonist    | D1                | Yes                 | 11 mg/ml           | Anderson, P.H., <i>Eur J Pharmacol.</i> 1990 Jun 12;188(6):335-47                                                                                                                                                           |
| 14       | G09           | S 5890 | 5578-73-4   | 367.79                | Sanguinarine chloride           | 13-Methyl-[1,3]benzodioxolo[5,6-c]-1,3-dioxolo[4,5-i] phenanthridinium chloride          | Ion Pump              |        | Inhibitor  | Na+/K+ ATPase     | Slightly Soluble    | <0.3 mg/ml         | Chaturvedi, M.M., et al., <i>J. Biol. Chem.</i> 272, 30129 (1997)                                                                                                                                                           |
| 14       | G10           | S 7882 | 149-64-4    | 440.38                | (-)-Scopolamine,n-Butyl-bromide | Butylscopolamine bromide                                                                 | Cholinergic           |        | Antagonist | Muscarinic        | Yes                 | 50 mg/ml           | Kurahashi, K., et al., Inhibitory effects of various spasmolytics on the vagal afferent gastric excitatory response in cats. <i>Life Sci.</i> 61, 831-838 (1997)                                                            |
| 14       | G11           | S 8442 | 204005-46-9 | 238.29                | SU 5416                         | 1,3-Dihydro-3-[(3,5-dimethyl-1H-pyrrol-2-yl)methylene]-2H-indol-2-one                    | Phosphorylation       |        | Inhibitor  | VEGFR PTK         | Insoluble           |                    | Takamoto, T., et al, Flk-1 specific kinase inhibitor (SU5416) inhibited the growth of GS-9L glioma in rat brain and prolonged the survival <i>Kobe J. Med. Sci</i> 47, 181-191 (2001)                                       |

| Rack No. | Rack Position | CATNUM | CAS number  | Mol. Weight Structure | Name                                        | Secondary Name                                                                                                | Class             | Enzyme | Action     | Selectivity   | Solubility in Water | Solubility in DMSO | Reference                                                                                                                                                                                                                                                                                                    |
|----------|---------------|--------|-------------|-----------------------|---------------------------------------------|---------------------------------------------------------------------------------------------------------------|-------------------|--------|------------|---------------|---------------------|--------------------|--------------------------------------------------------------------------------------------------------------------------------------------------------------------------------------------------------------------------------------------------------------------------------------------------------------|
| 14       | H02           | R 5010 | 501-36-0    | 228.25                | Resveratrol                                 | 5-((1E)-2-(4-Hydroxyphenyl)ethenyl)-1,3-benzenediol                                                           | Prostaglandin     | Enzyme | Inhibitor  | COX           |                     |                    | MacCarrone, M., et al., Resveratrol prevents apoptosis in K562 cells by inhibiting lipoygenase and cyclooxygenase activity. Eur. J. Biochem. 265, 27-34 (1999)                                                                                                                                               |
| 14       | H03           | R 8875 | 83-79-4     | 394.43                | Rotenone                                    |                                                                                                               | Cell Stress       |        | Modulator  | Mitochondria  |                     |                    | Fukami, J.I., et al., Science 155, 713 (1967)                                                                                                                                                                                                                                                                |
| 14       | H04           | R-107  | 127500-84-9 | 301.77                | Ro 41-1049 hydrochloride                    | N-(2-Aminoethyl)-5-(3-fluorophenyl)-4-thiazolecarboxamide hydrochloride                                       | Neurotransmission | Enzyme | Inhibitor  | MAO-A         | Yes                 |                    | Kettler, et al., Neuropharmacological comparison of moclobemide with the novel MAO-A inhibitor Ro 41-1049 in the rat J. Neurochem. 52, S154 (1989)                                                                                                                                                           |
| 14       | H05           | D 7815 | 71771-90-9  | 317.39                | R(-)-Denopamine                             | (-)-alpha-(3,4-dimethoxyphenethylaminomethyl)-4-hydroxybenzylalcohol                                          | Adrenoceptor      |        | Agonist    | beta1         | Insoluble           |                    | Sakuma, T. et al., J. Appl. Physiol. 90, 10-16 (2001)                                                                                                                                                                                                                                                        |
| 14       | H06           | S 1438 | 59864-04-9  | 372.42                | Sulindac sulfone                            | (Z)-5-Fluoro-2-methyl-1-[p-(methylsulfonyl)benzylidene]indene-3-acetic acid                                   | Prostaglandin     | Enzyme | Inhibitor  |               |                     |                    | Vogiagis, D. et al., Rat colorectal tumours treated with a range of non-steroidal anti-inflammatory drugs show altered cyclooxygenase-2 and cyclooxygenase-1 splice variant mRNA expression levels. Carcinogenesis 22, 869 (2001)                                                                            |
| 14       | H07           | S 2381 | 18822-91-8  | 464.13                | DL-Stearoylcarnitine chloride               |                                                                                                               | Phosphorylation   | Enzyme | Inhibitor  | PKC           |                     |                    | Nekadate and Blumberg, Cancer Res. 47, 6547 (1987)                                                                                                                                                                                                                                                           |
| 14       | H08           | S 3191 |             | 419.15                | SKF 83565 hydrobromide                      | 6-chloro-1-(3-chlorophenyl)-7,8-dihydroxy-3-methyl-2,3,4,5-tetrahydro-1H-3-benzazepine hydrobromide           | Dopamine          |        | Agonist    | D1            | Yes                 | 4.5 mg/ml          | Adachi, K. et al., Eur. J. Pharmacol. 367, 143-149 (1999)                                                                                                                                                                                                                                                    |
| 14       | H09           | S 6633 | 63250-32-8  | 215.21                | N-Succinyl-L-proline                        |                                                                                                               | Neurotransmission | Enzyme | Inhibitor  | ACE           |                     |                    | Ondetti, M.A., Science 196, 441 (1977)                                                                                                                                                                                                                                                                       |
| 14       | H10           | S 7936 |             | 330.41                | SB 205384                                   | 4-Amino-7-hydroxy-2-methyl-5,6,7,8-tetrahydrobenzo[b]thieno[2,3-b]pyridine-3-carboxylic acid but-2-ynyl ester | GABA              |        | Modulator  | GABA-A        | Insoluble           |                    | Meadows, H., Br. J. Pharmacol. 121, 1334-1338 (1997)                                                                                                                                                                                                                                                         |
| 14       | H11           | S 8502 | 155-41-9    | 398.30                | (-)-Scopolamine methyl bromide              | Hyoscyine methyl bromide                                                                                      | Cholinergic       |        | Antagonist | Muscarinic    | Yes                 | 50 mg/ml           | Sharif, N.A., et al., Affinities of muscarinic drugs for N-methylscopolamine (NMS) and oxotremorine (OXO) binding to a mixture of M1-M4 muscarinic receptors: use of NMS/OXO-M ratios to group compounds into potential agonist, partial agonist, and antagonist classes. Neurochem. Res. 20, 669-674 (1995) |
| 15       | A02           | S 8567 | 5812-07-7   | 264.33                | SU 4312                                     | 3-(4-Dimethylaminobenzylidene)-2-indolinone                                                                   | Phosphorylation   | Enzyme | Inhibitor  | KDR           | Insoluble           |                    | Kendall, R.L., et al., Vascular endothelial growth factor receptor KDR tyrosine kinase activity is increased by autophosphorylation of two activation loop tyrosine residues J. Biol. Chem. 274, 6453-5460 (1999)                                                                                            |
| 15       | A03           | S-008  |             | 228.72                | 1-(2-Methoxyphenyl)piperazine hydrochloride | 2-MPP hydrochloride                                                                                           | Serotonin         |        | Agonist    | 5-HT1 > 5-HT2 |                     |                    |                                                                                                                                                                                                                                                                                                              |
| 15       | A04           | S-154  | 17094-01-8  | 237.22                | Sepiapterin                                 | S(-)-2-Amino-7,8-dihydro-6-(2-hydroxy-1-oxopropyl)-4(1H)-pteridione                                           | Nitric Oxide      | Enzyme | Cofactor   | NOS           |                     |                    | Lelechuk, et al., Constitutive and inducible nitric oxide synthases in human megakaryoblastic cells J. Pharmacol. Exp. Ther. 262, 1220-1224 (1992)                                                                                                                                                           |
| 15       | A05           | T 0410 | 51012-32-9  | 364.89                | Tiapride hydrochloride                      | N-(2-[Diethylamino]ethyl)-5-(methylsulfonyl)-o-anisamide hydrochloride                                        | Dopamine          |        | Antagonist | D2/D3         |                     |                    | Peters and Faulds, Tiapride, A review of its pharmacology and therapeutic potential in the management of alcohol dependence syndrome Drugs 47, 1010 (1994)                                                                                                                                                   |
| 15       | A06           | T 1516 | 58947-95-8  | 337.94                | Trihexyphenidyl hydrochloride               |                                                                                                               | Cholinergic       |        | Antagonist | Muscarinic    | Yes                 |                    | Hayakawa, et al., Effects of anti-Parkinsonian drugs on neurobehavioural changes induced by bilateral 6-hydroxydopamine lesions in rats Clin. Exp. Pharmacol. Physiol. 26, 421-425 (1999)                                                                                                                    |
| 15       | A07           | T 2528 | 23031-32-5  | 548.66                | Terbutaline hemisulfate                     | 2-(1-Butylamino-1-(3,5-dihydroxyphenyl)ethanol                                                                | Adrenoceptor      |        | Agonist    | beta          |                     |                    | Torneke, K., et al., A comparison between clenbuterol, salbutamol and terbutaline in relation to receptor binding and in vitro relaxation of equine tracheal muscle. J. Vet. Pharmacol. Ther. 21, 388-392 (1998)                                                                                             |
| 15       | A08           | T 4182 | 175178-82-2 | 315.76                | Tyrphostin AG 1478                          | N-(3-Chlorophenyl)-6,7-dimethoxy-4-quinazolinamine                                                            | Phosphorylation   | Enzyme | Inhibitor  | EGFR          |                     |                    | Osherov, N. and Levitzki, A. Eur. J. Biochem. 225, 1047 (1994)                                                                                                                                                                                                                                               |

| Rack No. | Rack Position | CATNUM | CAS number  | Mol. Weight Structure | Name                                  | Secondary Name                                                                                      | Class             | Enzyme | Action     | Selectivity            | Solubility in Water | Solubility in DMSO | Reference                                                                                                                                                                                                                                       |
|----------|---------------|--------|-------------|-----------------------|---------------------------------------|-----------------------------------------------------------------------------------------------------|-------------------|--------|------------|------------------------|---------------------|--------------------|-------------------------------------------------------------------------------------------------------------------------------------------------------------------------------------------------------------------------------------------------|
| 15       | A09           | T 4568 | 133550-49-9 | 308.34                | Tyrphostin AG 528                     | N-(3',4'-Dihydroxybenzylidene)acetyl-indoline                                                       | Phosphorylation   | Enzyme | Inhibitor  | EGFR                   |                     |                    | Gazit, A., et al., J. Med. Chem. 34, 1896 (1991)                                                                                                                                                                                                |
| 15       | A10           | T 5625 | 1077-28-7   | 206.33                | (±)-alpha-Lipoic Acid                 | (±)-1,2-Dithiolane-3-pentanoic acid                                                                 | Cell Stress       | Enzyme | Coenzyme   | Pyruvate dehydrogenase |                     |                    | Patel, M.S., and Hong, Y.S., Lipoic acid as an antioxidant. The role of dihydrolipoamide dehydrogenase Meth. Mol. Biol. 108, 337-346 (1998)                                                                                                     |
| 15       | A11           | T 6764 | 6138-79-0   | 314.86                | Triprolidine hydrochloride            | (E)-2-[3-(1-Pyrrolidinyl)-1-propylpropenyl]pyridine hydrochloride                                   | Histamine         |        | Antagonist | H1                     |                     |                    | Kuzmin, et al., The effect of histamine receptor antagonists on stress-induced catecholamine secretion: an adrenomedullary microdialysis study in the rat. Eur. J. Pharmacol. 378, 311 (1999)                                                   |
| 15       | B02           | S 8688 |             | 415.49                | SR 59230A oxalate                     | 3-(2-ethylphenoxy)-1-[(1S)-1,2,3,4-tetrahydronaphth-1-ylamino]-(2S)-2-propanol oxalate              | Adrenoceptor      |        | Antagonist | beta3                  | Insoluble           |                    | Brown, K.J., Summers, R.J., Eur. J. Pharmacol. 415, 257 (2001)                                                                                                                                                                                  |
| 15       | B03           | S-009  | 1814-64-8   | 349.40                | PAPP                                  | LY-165,163; p-Aminophenethyl-m-trifluoromethylphenyl piperazine                                     | Serotonin         |        | Agonist    | 5-HT1A                 | Insoluble           |                    | Cohen, M.L., et al., In vitro receptor specificity of the 5-HT1A selective phenylpiperazine, LY-165,163. Life Sci. 39, 2441 (1986)                                                                                                              |
| 15       | B04           | S-159  | 39624-66-3  | 413.47                | R(-)-SCH-12679 maleate                | R(-)-1-Phenyl-2,3,4,5-tetrahydro-1H-7,8-dimethoxy-3-benzazepine maleate                             | Dopamine          |        | Antagonist | D1                     | Yes                 | 17.3 mg/ml         | Barnett, et al., The behavioral pharmacology of SCH 12679. A new psychoactive agent Psychopharmacology 36, 281-290 (1974)                                                                                                                       |
| 15       | B05           | T 0625 | 107-35-7    | 125.15                | Taurine                               | 2-Aminoethanesulfonic acid                                                                          | Glycine           |        | Agonist    |                        |                     |                    | Han, N.L., Characterization of a glycine receptor domain that controls the binding and gating mechanisms of the beta-amino acid agonist, taurine. J. Neurochem. 79, 636 (2001)                                                                  |
| 15       | B06           | T 1633 | 58-55-9     | 179.18                | Theophylline                          | 1,3-Dimethylxanthine                                                                                | Adenosine         |        | Antagonist | A1 > A2                | Slightly Soluble    |                    | Reuter, et al., Phosphodiesterase inhibitors prevent NSAID enteropathy independently of effects on TNF-alpha release. Am. J. Physiol. 277, G8478-G8454 (1999)                                                                                   |
| 15       | B07           | T 2879 | 60-19-5     | 173.64                | 4-Hydroxyphenethylamine hydrochloride | Tyramine hydrochloride                                                                              | Dopamine          |        | Agonist    |                        |                     |                    | Bunzow, J.R., et al., Amphetamine, 3,4-methylenedioxymethamphetamine, lysergic acid diethylamide, and metabolites of the catecholamine neurotransmitters are agonists of a rat trace amine receptor. Mol. Pharmacol. 60, 1181 (2001)            |
| 15       | B08           | T 4264 | 522-48-5    | 236.75                | Tetrahydrozoline hydrochloride        |                                                                                                     | Adrenoceptor      |        | Agonist    | alpha                  |                     |                    | Ruffolo, R.R., Jr., Waddell, J.E., Receptor interactions of imidazolines: alpha-adrenoceptors of rat and rabbit aortae differentiated by relative potencies affinities and efficacies of imidazoline agonists. Br. J. Pharmacol. 77, 169 (1982) |
| 15       | B09           | T 4680 | 63590-64-7  | 423.90                | Terazosin hydrochloride               | 1-(4-Amino-6,7-dimethoxy-2-quinazolinyl)-4-[(tetrahydro-2-furanyl)carbonyl]piperazine hydrochloride | Adrenoceptor      |        | Antagonist | alpha1                 | Yes                 | 25 mg/ml           | Kyncl, J.J., Pharmacology of terazosin: alpha1-selective blocker J. Clin. Pharmacol. 33, 878-883 (1993)                                                                                                                                         |
| 15       | B10           | T 6031 | 76721-89-6  | 253.32                | DL-Thiorphan                          | DL-3-Mercapto-2-benzylpropanoylglycine                                                              | Neurotransmission | Enzyme | Inhibitor  | Enkephalinase          |                     |                    | Roques, B.P., et al., Nature 288, 286 (1980)                                                                                                                                                                                                    |
| 15       | B11           | T 6943 |             | 236.23                | Tyrphostin AG 112                     | 3-Amino-2,4-dicyano-5-(4'-hydroxyphenyl)-penta-2,4-dienonitrile                                     | Phosphorylation   | Enzyme | Inhibitor  | Tyrosine kinase        |                     |                    | Gazit, A., et al., J. Med. Chem. 32, 2344 (1989)                                                                                                                                                                                                |
| 15       | C02           | B 5559 |             | 391.77                | BRL 52537 hydrochloride               | (+/-)-1-(3,4-Dichlorophenyl)acetyl-2-(1-pyrrolidinyl)methylpiperidine hydrochloride                 | Neurotransmission |        | Agonist    | kappa/mu opioid        | Insoluble           |                    | Dortch-Carnes, J. et al., J. Pharmacol. Exp. Ther. 301, 599-604 (2002)                                                                                                                                                                          |
| 15       | C03           | S-103  | 1054-88-2   | 379.46                | Spiroxitrine                          | R 5188                                                                                              | Serotonin         |        | Agonist    | 5-HT1A                 | Slightly Soluble    |                    | Nelson, D.L., and Taylor, E.W., Spiroxitrine: A selective serotonin1A receptor antagonist Eur. J. Pharmacol. 124, 207 (1986)                                                                                                                    |
| 15       | C04           | S-168  | 104422-04-0 | 376.30                | (±)-SKF 38393, N-allyl-, hydrobromide | (±)-7,8-Dihydroxy-3-allyl-1-phenyl-2,3,4,5-tetrahydro-1H-3-benzazepine hydrobromide                 | Dopamine          |        | Agonist    | D1                     | Yes                 | 6.0 mg/ml          | Weed, M.R., et al., The relationship between reinforcing effects and in vitro effects of D1 agonists in monkeys J. Pharmacol. Exp. Ther. 283, 29-38 (1997)                                                                                      |
| 15       | C05           | T 0780 | 5591-45-7   | 480.10                | Thiothixene hydrochloride             | SKF-5019 hydrochloride                                                                              | Dopamine          |        | Antagonist | D1/D2                  |                     |                    | Guthrie, et al., The effect of paroxetine on thiothixene pharmacokinetics J. Clin. Pharm. Ther. 22, 221-226 (1997)                                                                                                                              |
| 15       | C06           | T 1694 |             | 101.11                | (E)-4-amino-2-butenic acid            | TACA                                                                                                | GABA              |        | Agonist    | GABA-C                 | Yes                 | >20 mg/ml          | Chebib, M. et al., Br. J. Pharmacol. 122, 1551 (1997)                                                                                                                                                                                           |

| Rack No. | Rack Position | CATNUM | CAS number  | Mol. Weight Structure | Name                                          | Secondary Name                                                                                      | Class           | Enzyme | Action     | Selectivity           | Solubility in Water | Solubility in DMSO | Reference                                                                                                                                                                                                                                                                                            |
|----------|---------------|--------|-------------|-----------------------|-----------------------------------------------|-----------------------------------------------------------------------------------------------------|-----------------|--------|------------|-----------------------|---------------------|--------------------|------------------------------------------------------------------------------------------------------------------------------------------------------------------------------------------------------------------------------------------------------------------------------------------------------|
| 15       | C07           | T 2896 | 1098-60-8   | 388.89                | Triflupromazine hydrochloride                 |                                                                                                     | Dopamine        |        | Antagonist | D2                    |                     |                    | Jovanovic-Micic, D., The role of alpha-adrenergic mechanisms within the area postrema in dopamine-induced emesis Eur. J. Pharmacol. 272, 21 (1995)                                                                                                                                                   |
| 15       | C08           | T 4318 |             | 280.29                | Tyrphostin AG 494                             | N-Phenyl-3,4-dihydroxybenzylidenecyanoacetamide                                                     | Phosphorylation | Enzyme | Inhibitor  | EGFR                  |                     |                    | Kleinberger-Doron, N, et al.,Exp. Cell Res. 241, 340 (1998)                                                                                                                                                                                                                                          |
| 15       | C09           | T 4693 |             | 448.44                | Tyrphostin AG 537                             | Bis-Tyrphostin                                                                                      | Phosphorylation | Enzyme | Inhibitor  | EGFR                  |                     |                    | Levitski, A., and Gilon, C.,Trends Pharmacol. Sci. 12, 171 (1991)                                                                                                                                                                                                                                    |
| 15       | C10           | T 6050 | 56776-01-3  | 264.20                | Tulobuterol hydrochloride                     |                                                                                                     | Adrenoceptor    |        | Agonist    | beta                  |                     |                    | Terpstra, G.K., and Raaijmakers, J.A.,b-agonistic properties of tulobuterol, a newb-sympathomimetic drug, and its effects on pulmonaryb-adrenoceptor characteristics. Lung 168, 179-185 (1990)                                                                                                       |
| 15       | C11           | T 7040 | 2826-26-8   | 184.20                | Tyrphostin 1                                  | (4-Methoxybenzylidene)malononitrile                                                                 | Phosphorylation | Enzyme | Inhibitor  | EGFR                  |                     |                    | Nowak, F., et al., Biochem Pharmacol. 1997 Feb 7;53(3):287-98                                                                                                                                                                                                                                        |
| 15       | D02           | S 9066 |             | 371.91                | SKF 89976A hydrochloride                      | 1-(4,4-Diphenyl-3-butenyl)-3-piperidinecarboxylic acid hydrochloride                                | GABA            |        | Inhibitor  | GAT-1                 | Insoluble           |                    | Zuiderwijk, M. et al.,Eur. J. Pharmacol. 307, 275-282 (1996)                                                                                                                                                                                                                                         |
| 15       | D03           | S-106  | 105538-73-6 | 368.23                | SR-95531                                      | 2-(3-Carboxypropyl)-3-amino-6-(4-methoxyphenyl)pyridazinium bromide                                 | GABA            |        | Antagonist | GABA-A                | Yes                 | 5.0 mg/ml          | Wermuth, et al., Pyridazinyl-GABA derivatives: A new class of synthetic GABA-A antagonists. Trends Pharmacol. Sci. 7, 421 (1986)                                                                                                                                                                     |
| 15       | D04           | S-174  | 137196-67-9 | 337.25                | SDZ-205,557 hydrochloride                     | 4-Amino-5-chloro-2-methoxybenzoic acid 2-(diethylamino)ethyl ester hydrochloride                    | Serotonin       |        | Antagonist | 5-HT4                 | Yes                 | 65 mg/ml           | Lorain, et al., 5-HT4receptors present in piglet atria and sensitive to SDZ 205-557 are absent in papillary muscle Eur. J. Pharmacol. 229, 105 (1992)                                                                                                                                                |
| 15       | D05           | T 0891 | 64-77-7     | 270.35                | Tolbutamide                                   |                                                                                                     | Hormone         |        | Releaser   | Insulin               |                     |                    | Jones, B.C., et al.,Drug Metab. Dispos. 24, 260-266 (1996)                                                                                                                                                                                                                                           |
| 15       | D06           | T 1698 |             | 288.50                | Tetradecylthioacetic acid                     | TTA                                                                                                 | Transcription   |        | Agonist    | PPAR-alpha            |                     |                    | Raspe, E., et al., Modulation of rat liver apolipoprotein gene expression and serum lipid levels by tetradecylthioacetic acid (TTA) via PPARalphaactivation. Keratinocyte gene expression and differentiation by PPAR-selective ligands and tetradecylthioacetic acid. J. Lipid Res. 40, 2099 (1999) |
| 15       | D07           | T 3146 | 521-78-8    | 410.52                | Trimipramine maleate                          |                                                                                                     | Serotonin       |        | Inhibitor  | Reuptake              |                     |                    | Langosch, et al., Effects of the atypical antidepressant trimipramine on field potentials in the low Mg2+-model in guinea pig hippocampal slices. Eur. Neuropharmacol. 8, 209 (1998)                                                                                                                 |
| 15       | D08           | T 4376 | 402-71-1    | 351.85                | N-p-Tosyl-L-phenylalanine chloromethyl ketone | TPCK                                                                                                | Biochemistry    | Enzyme | Inhibitor  | Chymotrypsin alpha    |                     |                    | Breithaupt, T.B., et al., The suppression of T cell function and NFkB expression by serine protease inhibitors is blocked by N-acetylcysteine Cell. Immunol. 173, 124-130 (1996)                                                                                                                     |
| 15       | D09           | T 4818 | 133550-34-2 | 322.37                | Tyrphostin AG 555                             | Tyrphostin B46                                                                                      | Phosphorylation | Enzyme | Inhibitor  | EGFR                  |                     |                    | Gazit, A., et al.,J. Med. Chem. 34, 1896 (1991)                                                                                                                                                                                                                                                      |
| 15       | D10           | T 6154 | 25332-39-2  | 408.33                | Trazodone hydrochloride                       | 2-[3-[4-(3-Chlorophenyl)-1-piperazinyl]propyl]-1,2,4-triazolo[4,3-a]pyridin-3(2H)-one hydrochloride | Serotonin       |        | Inhibitor  | Reuptake              | Insoluble           |                    | Marcoli, M., et al., Trazodone is a potent agonist at 5-HT2Creceptors mediating inhibition of the N-methyl-D-aspartate/nitric oxide/cyclic GMP pathway in rat cerebellum J. Pharmacol. Exp. Ther. 285, 983-986 (1998)                                                                                |
| 15       | D11           | T 7165 | 118409-57-7 | 186.17                | Tyrphostin 23                                 | 3,4-(Dihydroxybenzylidene)malononitrile                                                             | Phosphorylation | Enzyme | Inhibitor  | EGFR                  |                     |                    | Nowak, F., et al., Biochem Pharmacol. 1997 Feb 7;53(3):287-98                                                                                                                                                                                                                                        |
| 15       | E02           | S 9186 |             | 213.24                | SIB 1757                                      | 6-Methyl-2-(phenylazo)-3-pyridinol                                                                  | Glutamate       |        | Antagonist | mGluR5                |                     |                    | Varney, MA, et al., SIB-1757 and SIB-1893: selectivenoncompetitive antagonists of metabotropic glutamate receptor type 5 J. Pharmacol. Exp. Ther. 290, 170-181 (1999)                                                                                                                                |
| 15       | E03           | S-143  | 71636-61-8  | 370.68                | (±)-6-Chloro-PB hydrobromide                  | (±)-SKF-81297 hydrobromide                                                                          | Dopamine        |        | Agonist    | D1                    | Yes                 | 1.7 mg/ml          | Andersen, et al., Dopamine receptor agonists: Selectivity and dopamine D1receptor efficacy. Eur. J. Pharmacol. 188, 335-347 (1990)                                                                                                                                                                   |
| 15       | E04           | S-180  | 158942-04-2 | 328.80                | SB 206553 hydrochloride                       | N-3-Pyridinyl-3,5-dihydro-5-methyl-benzo[1,2-b:4,5-b']dipyrrole-1(2H)-carboxamide hydrochloride     | Serotonin       |        | Antagonist | 5-HT2C/5-HT2B         | Yes                 | 30 mg/ml           | Forbes, I.T., et al., Synthesis, biological activity and molecular modeling studies of selective 5-HT2C/2B receptor antagonists. J. Med. Chem. 39, 4966 (1996)                                                                                                                                       |
| 15       | E05           | T 1132 | 97-77-8     | 296.54                | Tetraethylthiuram disulfide                   | Disulfiram                                                                                          | Biochemistry    | Enzyme | Inhibitor  | Alcohol Dehydrogenase |                     |                    | Shukla, S., et al., Biochem Biophys Res Commun. 2004 Sep 17;322(2):520-5                                                                                                                                                                                                                             |

| Rack No. | Rack Position | CATNUM | CAS number  | Mol. Weight Structure | Name                                                  | Secondary Name                                                                                                                                | Class              | Enzyme | Action     | Selectivity                            | Solubility in Water | Solubility in DMSO | Reference                                                                                                                                                                                                                                                                                                                                  |
|----------|---------------|--------|-------------|-----------------------|-------------------------------------------------------|-----------------------------------------------------------------------------------------------------------------------------------------------|--------------------|--------|------------|----------------------------------------|---------------------|--------------------|--------------------------------------------------------------------------------------------------------------------------------------------------------------------------------------------------------------------------------------------------------------------------------------------------------------------------------------------|
| 15       | E06           | T 2057 | 78416-81-6  | 441.96                | Trequinsin hydrochloride                              | HL 725                                                                                                                                        | Cyclic Nucleotides | Enzyme | Inhibitor  | PDE III                                |                     |                    | Reid, IA., Role of phosphodiesterase isoenzymes in the control of renin secretion: effects of selective enzyme inhibitors Curr. Pharm. Des. 5, 725-735 (1999)                                                                                                                                                                              |
| 15       | E07           | T 3434 | 133550-30-8 | 294.31                | Tyrphostin AG 490                                     | 2-propenamamide                                                                                                                               | Phosphorylation    | Enzyme | Inhibitor  | JAK2                                   | Insoluble           |                    | Abe, et al., Fyn and JAK2 mediate Ras activation by reactive oxygen species J. Biol. Chem. 274, 21003-21010 (1999)                                                                                                                                                                                                                         |
| 15       | E08           | T 4425 | 69056-38-8  | 314.17                | (6R)-5,6,7,8-Tetrahydro-L-biopterin hydrochloride     |                                                                                                                                               | Neurotransmission  | Enzyme | Cofactor   | Tyrosine & tryptophan hydroxylase, NOS |                     |                    | Kwon, N.S., et al., J. Biol. Chem. 264, 20498 (1989)                                                                                                                                                                                                                                                                                       |
| 15       | E09           | T 5193 |             | 308.34                | Tyrphostin AG 698                                     | Tyrphostin B52                                                                                                                                | Phosphorylation    | Enzyme | Inhibitor  | EGFR                                   |                     |                    | Gazit, A., et al., J. Med. Chem. 34, 1896 (1991)                                                                                                                                                                                                                                                                                           |
| 15       | E10           | T 6318 |             | 216.20                | Tyrphostin AG 34                                      | Tyrphostin A24                                                                                                                                | Phosphorylation    | Enzyme | Inhibitor  | Tyrosine kinase                        |                     |                    | Baldari, C. T., Telford, J. L., Dissection of T cell antigen receptor signaling using protein tyrosine kinase inhibitors Eur. J. Immunol. 24, 1046 (1994)                                                                                                                                                                                  |
| 15       | E11           | T 7188 |             | 284.73                | TFPI hydrochloride                                    | S-Ethyl N-(4-[Trifluoromethyl]phenyl)isothiour ea                                                                                             | Nitric Oxide       | Enzyme | Inhibitor  | nNOS                                   |                     |                    | Shearer, B.G., et al., J. Med. Chem. 40, 1901 (1997)                                                                                                                                                                                                                                                                                       |
| 15       | F02           | S 9311 | 7370-21-0   | 195.27                | SIB 1893                                              | (E)-2-Methyl-6-[2-phenylethenyl]pyridine                                                                                                      | Glutamate          |        | Antagonist | mGluR5                                 |                     |                    | Varney, MA, et al., J. Pharmacol. Exp. Ther. 290, 170-181 (1999)                                                                                                                                                                                                                                                                           |
| 15       | F03           | S-145  | 68643-23-2  | 248.22                | SKF 91488 dihydrochloride                             | 4-(N,N-Dimethylamino)butylisothiour ea dihydrochloride                                                                                        | Histamine          | Enzyme | Inhibitor  | Histamine N-methyltransferase          | Yes                 |                    | Knigge, et al., Involvement of histamine in the mediation of the stress-induced release of alpha-melanocyte-stimulating hormone in male rats. Neuroendocrinology 54, 646 (1991)                                                                                                                                                            |
| 15       | F04           | S-201  |             | 557.10                | SB 224289 hydrochloride                               | 1'-Methyl-5-[(2'-methyl-4'-(5-methyl-1,2,4-oxadiazol-3-yl)biphenyl-4-yl)carbonyl]-2,3,6,7-tetrahydro-spiro[furo[2,3-f]indole-3,4'-piperidine] | Serotonin          |        | Antagonist | 5-HT1B                                 | Insoluble           |                    | Gaster, L.M., et al., The selective 5-HT1B receptor inverse agonist 1'-methyl-5-[(2'-methyl-4'-(5-methyl-1,2,4-oxadiazol-3-yl)biphenyl-4-yl)carbonyl]-2,3,6,7-tetrahydro-spiro[furo[2,3-f]indole-3,4'-piperidine] (SB-224289) potently blocks terminal 5-HT autoreceptor function both in vitro and in vivo. J. Med. Chem. 41, 1218 (1998) |
| 15       | F05           | T 1443 |             | 402.07                | TCPOBOP                                               | 1,4-Bis-[2-(3,5-dichloropyridyloxy)]benzene                                                                                                   | Transcription      |        | Agonist    | CAR                                    | Insoluble           |                    | Kende, A.S., et al., Structure-activity relationship of bispyridyloxybenzene for induction of mouse hepatic aminopyrine N-demethylase activity. Chemical, biological, and X-ray crystallographic studies Mol. Pharmacol. 28, 445 (1985)                                                                                                    |
| 15       | F06           | T 2067 | 148741-30-4 | 316.47                | Tyrphostin AG 879                                     | alpha-cyano-(3,5-di-t-butyl-4-hydroxy)thiocinnamide                                                                                           | Phosphorylation    | Enzyme | Inhibitor  | TrkA                                   |                     |                    | Ohmichi, M., et al., The tyrosine kinase inhibitor tyrphostin blocks the cellular actions of nerve growth factor. Biochemistry 32, 4650-4658 (1993)                                                                                                                                                                                        |
| 15       | F07           | T 3757 | 71441-28-6  | 348.49                | TTNPB                                                 | Arotinoid acid                                                                                                                                | Transcription      |        | Ligand     | RAR-alpha, beta, gamma                 |                     |                    | Sheikh, M.S., et al., J. Biol. Chem. 269, 21440 (1994)                                                                                                                                                                                                                                                                                     |
| 15       | F08           | T 4443 | 133550-32-0 | 308.34                | Tyrphostin AG 527                                     | Tyrphostin B44                                                                                                                                | Phosphorylation    | Enzyme | Inhibitor  | EGFR                                   |                     |                    | Gazit, A., et al., J. Med. Chem. 34, 196 (1991)                                                                                                                                                                                                                                                                                            |
| 15       | F09           | T 5318 |             | 304.31                | Tyrphostin AG 808                                     | 2-Cyano-3-(3',4'-dihydroxyphenyl)-1-(3'-indolyl)-3-oxo-1-propene                                                                              | Phosphorylation    | Enzyme | Inhibitor  | Tyrosine kinase                        |                     |                    | Romer, L.H., et al., Mol Biol Cell. 1994 Mar;5(3):349-61                                                                                                                                                                                                                                                                                   |
| 15       | F10           | T 6376 | 124-94-7    | 394.44                | Triamcinolone                                         | Fluoxyprednisolone                                                                                                                            | Hormone            |        | Agonist    | Glucocorticoid                         |                     |                    | Boden, S.D., et al., Differential effects and glucocorticoid potentiation of bone morphogenetic protein action during rat osteoblast differentiation in vitro. Endocrinology 137, 3401-3407 (1996)                                                                                                                                         |
| 15       | F11           | T 7254 | 4238-41-9   | 369.31                | Na-p-Tosyl-L-lysine chloromethyl ketone hydrochloride | TLCK hydrochloride                                                                                                                            | Cyclic Nucleotides | Enzyme | Inhibitor  | Adenylyl cyclase                       | Yes                 | 50 mg/ml           | Kwo, P., et al., Nuclear serine protease activity contributes to bile acid-induced apoptosis in hepatocytes. Am. J. Physiol. 268, G613-G621 (1995)                                                                                                                                                                                         |
| 15       | G02           | S-003  |             | 248.76                | 1-(1-Naphthyl)piperazine hydrochloride                |                                                                                                                                               | Serotonin          |        | Antagonist | 5-HT2                                  | Yes                 |                    | Fuller, R.W., et al., 1-(1-Naphthyl)piperazine, a central serotonin agonist, Res. Commun. Chem. Pathol. Pharmacol. 51, 37-45 (1986)                                                                                                                                                                                                        |
| 15       | G03           | S-149  |             | 1429.19               | Suramin hexasodium                                    |                                                                                                                                               | P2 Receptor        |        | Antagonist | P2X, P2Y                               | Yes                 | >10 mg/ml          | Bailey, S.J., and Hourani, S.M., Br J Pharmacol. 1994 May;112(1):219-25                                                                                                                                                                                                                                                                    |
| 15       | G04           | T 0254 | 73-22-3     | 204.23                | L-Tryptophan                                          | S(-)-1-alpha-Aminoindole-3-propionic acid iso-OMPA                                                                                            | Serotonin          |        | Precursor  |                                        |                     |                    | Reader, T.A., et al., Neurochem. Res. 24, 1125 (1999)                                                                                                                                                                                                                                                                                      |
| 15       | G05           | T 1505 | 513-00-8    | 342.36                | Tetraisopropyl pyrophosphoramidate                    |                                                                                                                                               | Biochemistry       | Enzyme | Inhibitor  | Butyrylcholinesterase                  |                     |                    | Koelle, G.B., et al., Biochem. Pharmacol. 23, 175 (1974)                                                                                                                                                                                                                                                                                   |
| 15       | G06           | T 2265 | 56-34-8     | 165.71                | Tetraethylammonium chloride                           |                                                                                                                                               | Cholinergic        |        | Antagonist | Nicotinic                              |                     |                    | Raymond, V., Hyperpolarization-activated inward potassium and calcium-sensitive chloride currents in beating pacemaker insect neurosecretory cells (dorsal unpaired median neurons). Neuroscience 93, 1207 (1999)                                                                                                                          |



| Rack No. | Rack Position | CATNUM | CAS number  | Mol. Weight Structure | Name                                                           | Secondary Name                                                                                                                        | Class                 | Enzyme | Action     | Selectivity      | Solubility in Water | Solubility in DMSO | Reference                                                                                                                                                                                                                    |
|----------|---------------|--------|-------------|-----------------------|----------------------------------------------------------------|---------------------------------------------------------------------------------------------------------------------------------------|-----------------------|--------|------------|------------------|---------------------|--------------------|------------------------------------------------------------------------------------------------------------------------------------------------------------------------------------------------------------------------------|
| 15       | G07           | L 3040 |             | 522.61                | L-765,314                                                      | (2S)-4-(4-Amino-6,7-dimethoxy-2-quinazolinyl)-2-[[[(1,1-Dimethylethyl)amino]carbonyl]-1-piperazinecarboxylic acid, phenylmethyl ester | Adrenoceptor          |        | Antagonist | alpha-1B         |                     |                    | Patane, M.A., et al., J Med Chem. 1998 Apr 9;41(8):1205-8                                                                                                                                                                    |
| 15       | G08           | T 4500 | 83-67-0     | 180.17                | Theobromine                                                    | 3,7-Dimethylxanthine                                                                                                                  | Adenosine             |        | Antagonist | A1 > A2          | Slightly Soluble    |                    | Shi, et al., Chronic effects of xanthines on levels of central receptors in mice Cell. Mol. Neurobiol. 19, 719-732 (1999)                                                                                                    |
| 15       | G09           | T 5515 | 19254-05-8  | 781.46                | Thio-NADP sodium                                               | Thionicotinamide adenine dinucleotide phosphate sodium                                                                                | Intracellular Calcium |        | Blocker    | NAADP-induced    |                     |                    | Gupta, S., et al., Biochim. Biophys. Acta 1409, 25 (1998)                                                                                                                                                                    |
| 15       | G10           | T 6394 | 29621-17-5  | 432.50                | S(-)-Timolol maleate                                           | (S)-1-[(1,1-Dimethylethyl)amino]-3-[[4-(4-morpholinyl)-1,2,5-thiadiazol-3-yl]oxy]-2-propanol maleate                                  | Adrenoceptor          |        | Antagonist | beta             | Yes                 |                    | Karhuvaara, S., et al., b-adrenoceptor antagonist activities and binding affinities of timolol enantiomers in rat atria. J. Pharm. Pharmacol. 41, 649-650 (1989)                                                             |
| 15       | G11           | T 7290 | 118409-58-8 | 202.17                | Tyrphostin 25                                                  | (4,5-Trihydroxybenzylidene)malononitrile                                                                                              | Phosphorylation       | Enzyme | Inhibitor  | EGFR             |                     |                    | Nowak, F., et al., Biochem Pharmacol. 1997 Feb 7;53(3):287-98                                                                                                                                                                |
| 15       | H02           | S-006  | 83846-83-7  | 545.53                | Ketanserin tartrate                                            | R 41468                                                                                                                               | Serotonin             |        | Antagonist | 5-HT2            |                     |                    | Van Nueten, J.M., Vascular effects of ketanserin (R41468) a novel antagonist of 5-HT2serotonergic receptors J. Pharmacol. Exp. Ther. 218, 217 (1981)                                                                         |
| 15       | H03           | S-153  | 17318-31-9  | 205.22                | SQ 22536                                                       | 9-(Tetrahydro-2-furanyl)-9H-purin-6-amine                                                                                             | Cyclic Nucleotides    | Enzyme | Inhibitor  | Adenylyl cyclase | Yes                 | 21 mg/ml           | Fabbri, et al., Inhibition of adenylate cyclase of catfish and rat hepatocyte membranes by 9-(tetrahydro-2-furyl)adenine (SQ 22536). J. Enz. Inhib. 5, 87 (1991)                                                             |
| 15       | H04           | T 0318 | 53902-12-8  | 327.34                | Tranilast                                                      | SB-252218                                                                                                                             | Leukotriene           | Enzyme | Inhibitor  | LTC4             | Insoluble           |                    | Capper, E.A., Modulation of human monocyte activities by Tranilast, SB 252218, a compound demonstrating efficacy in restenosis J. Pharmacol. Exp. Ther. 295, 1061 (2000)                                                     |
| 15       | H05           | T 1512 | 5086-74-8   | 240.76                | Tetramisole hydrochloride                                      | (±)-2,3,5,6-Tetrahydro-6-phenylimidazo[2,1-b]thiazole hydrochloride                                                                   | Phosphorylation       | Enzyme | Inhibitor  | Phosphatase      |                     |                    | Van Belle, H., Biochim. Biophys. Acta 289, 158 (1972)                                                                                                                                                                        |
| 15       | H06           | T 2408 | 1156-19-0   | 311.41                | Tolazamide                                                     |                                                                                                                                       | Hormone               |        | Releaser   | Insulin          |                     |                    | Delaey, C., Van de Voorde, J., Eur. J. Pharmacol. 325, 41 (1997)                                                                                                                                                             |
| 15       | H07           | T 4143 | 396-01-0    | 253.27                | Triamterene                                                    |                                                                                                                                       | Na+ Channel           |        | Blocker    |                  |                     |                    | Kato, A., Sands, J.M., Am. J. Physiol. 276, F62 (1999)                                                                                                                                                                       |
| 15       | H08           | T 4512 | 24198-97-8  | 304.26                | (±)-Taxifolin                                                  | Dihydroquercetin                                                                                                                      | Cell Stress           |        | Inhibitor  | Antioxidant      |                     |                    | Haraguchi, H., Protection against oxidative damage by dihydroflavonols in Engelhardtia chrysolepis. Biosci. Biotechnol. Biochem. 60, 945 (1996)                                                                              |
| 15       | H09           | T 5568 | 133550-37-5 | 308.34                | Tyrphostin AG 835                                              | Tyrphostin B50                                                                                                                        | Phosphorylation       | Enzyme | Inhibitor  | Tyrosine kinase  |                     |                    | Gazit, A., et al., J. Med. Chem. 34, 1896 (1991)                                                                                                                                                                             |
| 15       | H10           | T 6692 |             | 297.44                | N,N,N-trimethyl-1-(4-trans-stilbenoxy)-2-propylammonium iodide | F3                                                                                                                                    | Cholinergic           |        | Antagonist | Nicotinic        | Insoluble           |                    | Di Angelantonio, S., Antagonism of nicotinic receptors of rat chromaffin cells by N,N,N-trimethyl-1-(4-trans-stilbenoxy)-2-propylammonium iodide: a patch clamp and ligand binding study. Br. J. Pharmacol. 129, 1771 (2000) |
| 15       | H11           | T 7313 | 25371-96-4  | 212.18                | 1-[2-(Trifluoromethyl)phenyl]imidazole                         | TRIM                                                                                                                                  | Nitric Oxide          | Enzyme | Inhibitor  | NOS              |                     |                    | Handy, R.L.C., et al., Br. J. Pharmacol. 119, 423 (1996)                                                                                                                                                                     |
| 16       | A02           | T 7402 | 33069-624   | 853.93                | Taxol                                                          | Paclitaxel                                                                                                                            | Cytoskeleton and ECM  |        | Inhibitor  | Tubulin          |                     |                    | Parekh, H., and Simpkins, H., The transport and binding of taxol Gen. Pharmacol. 29, 167-172 (1997)                                                                                                                          |
| 16       | A03           | T 7947 | 82248-59-7  | 255.36                | Tomoxetine                                                     | (R)-N-methyl-gamma-(2-methylphenoxy)-benzenepropanamine                                                                               | Adrenoceptor          |        | Inhibitor  | Reuptake         |                     |                    | Hwang, et al., Neurosci. Lett. 265, 151 (1999)                                                                                                                                                                               |
| 16       | A04           | T 9262 | 54965-24-1  | 563.65                | Tamoxifen citrate                                              | (Z)-2-[4-(1,2-Diphenyl-1-butenyl)phenoxy]-N,N-dimethylethanamine citrate (1:1)                                                        | Phosphorylation       | Enzyme | Inhibitor  | PKC              |                     |                    | O'Brian, C.A., et al., Inhibition of protein kinase C by tamoxifen. Cancer Res. 45, 2462-2465 (1985)                                                                                                                         |
| 16       | A05           | T-122  | 80880-90-6  | 443.40                | Telenzepine dihydrochloride                                    | 4,9-Dihydro-3-methyl-4-(4-methyl-1-piperazinyl)acetyl]-10H-thieno[3,4-b][1,5]benzodiazepin-10-one dihydrochloride                     | Cholinergic           |        | Antagonist | M1               | Yes                 | 88 mg/ml           | Bertaccini, et al., Control of gastric acid secretion by histamine H2receptor antagonists and anticholinergics. Pharmacol. Res. 21, 339-352 (1989)                                                                           |
| 16       | A06           | U 4125 | 21931-53-3  | 448.13                | Uridine 5'-diphosphate sodium                                  | UDP                                                                                                                                   | P2 Receptor           |        | Agonist    | P2Y              |                     |                    | Nicholas, R.A., et al., Mol Pharmacol. 1996 Aug;50(2):224-9                                                                                                                                                                  |

| Rack No. | Rack Position | CATNUM | CAS number  | Mol. Weight Structure | Name                     | Secondary Name                                                                                                                                                       | Class                | Enzyme | Action     | Selectivity  | Solubility in Water | Solubility in DMSO | Reference                                                                                                                                                                                                                                                      |
|----------|---------------|--------|-------------|-----------------------|--------------------------|----------------------------------------------------------------------------------------------------------------------------------------------------------------------|----------------------|--------|------------|--------------|---------------------|--------------------|----------------------------------------------------------------------------------------------------------------------------------------------------------------------------------------------------------------------------------------------------------------|
| 16       | A07           | U-103  | 96744-75-1  | 356.51                | U-69593                  | (+)-(5alpha,7alpha,8beta)-N-Methyl-N-[7-(1-pyrrolidinyl)-1-oxaspiro[4.5]dec-8-yl]-benzeneacetamide                                                                   | Opioid               |        | Agonist    | kappa        | Insoluble           |                    | Nakagawa, T., et al., Sensitization of the adenylyl cyclase system in cloned kappa-opioid receptor-transfected cells following sustained agonist treatment: A chimeric study using G protein alpha(i)2/alpha(q) subunits Jpn. J. Pharmacol. 81, 353-361 (1999) |
| 16       | A08           | U-116  | 153570-58-2 | 393.48                | U-99194A maleate         | 5,6-Dimethoxy-2-(di-n-propylamino)indan maleate                                                                                                                      | Dopamine             |        | Antagonist | D3           | Yes                 | 80 mg/ml           | Waters, et al., The dopamine D3-receptor: A postsynaptic receptor inhibitory on rat locomotor activity J. Neural Trans. 94, 11-19 (1993)                                                                                                                       |
| 16       | A09           | V 8879 | 2068-78-2   | 923.06                | Vincristine sulfate      | VCR                                                                                                                                                                  | Cytoskeleton and ECM |        | Inhibitor  | Tubulin      | Yes                 | 50 mg/ml           | Mohammad, R.M., et al., Bryostatin 1 induces apoptosis and augments inhibitory effects of vincristine in human diffuse large cell lymphoma Leukemia Res. 19, 667-673 (1995)                                                                                    |
| 16       | A10           | W-104  | 138091-43-7 | 438.58                | WIN 62,577               | 17-beta-Hydroxy-17-alpha-ethynyl-delta-4-androstano(3,2-b)pyrimido(1,2-a)benzimidazole                                                                               | Tachykinin           |        | Antagonist | NK1          |                     |                    | Venepalli, et al., Synthesis and substance P receptor binding activity of androstano[32-b]pyrimido[12-a]benzimidazoles J. Med. Chem. 35, 374 (1992)                                                                                                            |
| 16       | A11           | Y 3125 | 65-19-0     | 390.91                | Yohimbine hydrochloride  | 17-Hydroxy-yohimban-16-carboxylic acid methyl ester hydrochloride                                                                                                    | Adrenoceptor         |        | Antagonist | alpha2       | Yes                 | 10 mg/ml           | Zhang, W., and Roomans, G.M., A yohimbine-dependent, UK14,304-induced ion transient in HT29 cells studied by X-ray microanalysis Scanning Microsc. 10, 293 (1996)                                                                                              |
| 16       | B02           | T 7508 | 136-47-0    | 300.83                | Tetracaine hydrochloride |                                                                                                                                                                      | Na+ Channel          |        | Modulator  |              |                     |                    | Reith, M.E., et al., Eur Pharmacol. 1987 Nov;143(2):171-8                                                                                                                                                                                                      |
| 16       | B03           | T 8067 |             | 620.07                | T-0156                   | 2-(2-Methylpyridin-4-yl)methyl-4-(3,4,5-trimethoxyphenyl)-8-(pyrimidin-2-yl)methoxy-1,2-dihydro-1-oxo-2,7-naphthyridine-3-carboxylic acid methyl ester hydrochloride | Cyclic Nucleotides   | Enzyme | Inhibitor  | PDE V        | Insoluble           |                    | Mochida, H., et al., Eur J Pharmacol. 2004 Feb 6;485(1-3):283-8                                                                                                                                                                                                |
| 16       | B04           | T 9652 | 50679-08-8  | 471.69                | Terfenadine              | alpha-(4-[1,1-Dimethylethyl]phenyl)-4-[hydroxydiphenylmethyl]-1-piperidinebutanol                                                                                    | Histamine            |        | Antagonist | H1           |                     |                    | Yun, C.H., et al., Drug Metab. Dispos. 21, 403-409 (1993)                                                                                                                                                                                                      |
| 16       | B05           | T-123  | 148440-81-7 | 408.52                | Thioperamide maleate     | MR 12842                                                                                                                                                             | Histamine            |        | Antagonist | H3           | Yes                 | 10 mg/ml           | Arrang, J.M., et al., Highly potent and selective ligands for histamine H3-receptors. Nature 327, 117-123 (1987)                                                                                                                                               |
| 16       | B06           | U 5882 | 153190-29-5 | 726.92                | U-74389G maleate         | 21-(4-[2,6-di-1-Pyrrolidinyl-4-pyrimidinyl]-1-piperazinyl)pregna-1,4,9[11]-triene-3,20-dione (Z)-2-butenedioate maleate                                              | Cell Stress          |        | Inhibitor  |              |                     |                    | Shi, F., et al., Free Radical Biol. Med. 19, 349 (1995)                                                                                                                                                                                                        |
| 16       | B07           | U-104  | 59803-98-4  | 292.14                | UK 14,304                | 5-Bromo-N-(4,5-dihydro-1H-imidazol-2-yl)-6-quinoxalinamine                                                                                                           | Adrenoceptor         |        | Agonist    | alpha2       |                     |                    | Turner, J.T., et al., a2-Adrenergic receptors in the human cell line, HT29. Characterization with the full agonist radioligand [3H]UK-14,304 and inhibition of adenylyl cyclase. Mol. Pharmacol. 28, 422-430 (1985)                                            |
| 16       | B08           | U-120  | 109511-58-2 | 380.50                | U0126                    | 1,4-Diamino-2,3-dicyano-1,4-bis(o-aminophenylmercapto)butadiene                                                                                                      | Phosphorylation      | Enzyme | Inhibitor  | MEK1/MEK2    |                     |                    | Favata, M., et al., Identification of a novel inhibitor of mitogen-activated protein kinase. J. Biol. Chem. 273, 18623 (1998)                                                                                                                                  |
| 16       | B09           | V 9130 | 2444-46-4   | 293.41                | N-Vanillylononamide      | N-(4-Hydroxy-3-methoxybenzyl)nonanamide                                                                                                                              | Vanilloid            |        | Ligand     |              |                     |                    | Durant, P.A., Yaksh, T.L., Micturition in the unanesthetized rat: effects of intrathecal capsaicin, N-vanillylononamide, 6-dihydroxytryptamine and 5,6-dihydroxytryptamine. Brain Res. 451, 301 (1988)                                                         |
| 16       | B10           | W-105  | 21416-43-3  | 199.17                | S(-)-Willardiine         | S(-)-alpha-Amino-3,4-dihydro-2,4-dioxo-1(2H)-pyrimidinepropanoic acid                                                                                                | Glutamate            |        | Agonist    | AMPA/kainate | Insoluble           |                    | Zorumski, C.F., et al., Effects of bromowillardiine and willardiine on non-N-methyl-D-aspartate receptors in postnatal rat hippocampal neurons. Mol. Pharmacol. 40, 45-51 (1991)                                                                               |
| 16       | B11           | Y-101  | 33978-72-2  | 395.93                | YS-035 hydrochloride     | N-[2-(3,4-Dimethoxyphenyl)ethyl]-3,4-dimethoxy-N-methylbenzeneethanamine hydrochloride                                                                               | Ca2+ Channel         |        | Blocker    | L-type       |                     |                    |                                                                                                                                                                                                                                                                |

| Rack No. | Rack Position | CATNUM | CAS number  | Mol. Weight Structure | Name                            | Secondary Name                                                                                                                             | Class                | Enzyme | Action     | Selectivity      | Solubility in Water | Solubility in DMSO | Reference                                                                                                                                                                                                                                              |
|----------|---------------|--------|-------------|-----------------------|---------------------------------|--------------------------------------------------------------------------------------------------------------------------------------------|----------------------|--------|------------|------------------|---------------------|--------------------|--------------------------------------------------------------------------------------------------------------------------------------------------------------------------------------------------------------------------------------------------------|
| 16       | C02           | T 7540 | 118409-60-2 | 220.25                | Tyrphostin 47                   | RG 50864                                                                                                                                   | Phosphorylation      | Enzyme | Inhibitor  | EGFR             |                     |                    | Nowak, F., et al., Biochem Pharmacol. 1997 Feb 7;53(3):287-98                                                                                                                                                                                          |
| 16       | C03           | T 8160 |             | 314.21                | 3-Tropanyl-3,5-dichlorobenzoate | MDL-72222                                                                                                                                  | Serotonin            |        | Antagonist | 5-HT3            |                     |                    |                                                                                                                                                                                                                                                        |
| 16       | C04           | T 9778 | 1508-75-4   | 284.36                | Tropicamide                     | Ro 1-7683                                                                                                                                  | Cholinergic          |        | Antagonist | M4               | Insoluble           |                    | Lazarigues, et al., Spontaneously hypertensive rats cholinergic hyper-responsiveness: central and peripheral pharmacological mechanisms Br. J. Pharmacol. 127, 1657-1665 (1999)                                                                        |
| 16       | C05           | T-144  | 50-35-1     | 258.24                | (±)-Thalidomide                 | (±)-2-(2,6-Dioxo-3-piperidinyl)-1H-isoindole-1,3(2H)-dione                                                                                 | Cytoskeleton and ECM |        | Inhibitor  | TNFalpha         | Insoluble           |                    | Makonkawkeyoon, et al., Thalidomide inhibits the replication of human immunodeficiency virus type 1. Proc. Natl. Acad. Sci. USA 90, 5974-5878 (1993)                                                                                                   |
| 16       | C06           | U 6007 | 122003-11-6 | 593.65                | U-83836 dihydrochloride         | (-)-2-((4-(2,6-Di-1-pyrrolidinyl-4-pyrimidinyl)-1-piperazinyl)methyl)-3,4-dihydro-2,5,7,8-tetramethyl-2H-1-benzopyran-6-ol dihydrochloride | Cell Stress          |        | Inhibitor  |                  |                     |                    | Salahudeen, A., et al., J. Amer. Soc. Nephrol. 6, 1300 (1995)                                                                                                                                                                                          |
| 16       | C07           | U-105  | 87151-85-7  | 521.51                | U-62066                         | Spiradoline mesylate                                                                                                                       | Opioid               |        | Agonist    | kappa            | Yes                 | 14 mg/ml           | Piercey, M.F., Einspahr, F.J., Spinal analgesic actions of kappa receptor agonists U-50488H and spiradoline (U-62066) J. Pharmacol. Exp. Ther. 251, 267 (1989)                                                                                         |
| 16       | C08           | V 1377 | 143-67-9    | 909.07                | Vinblastine sulfate salt        | VLB                                                                                                                                        | Cytoskeleton and ECM |        | Inhibitor  | Tubulin          | Yes                 | 10 mg/ml           | Lobert, S., et al., Interaction of vinca alkaloids with tubulin: a comparison of vinblastine, vincristine, and vinorelbine Biochemistry 35, 6806-6814 (1996)                                                                                           |
| 16       | C09           | V-100  | 120447-62-3 | 295.86                | (±)-Vesamicol hydrochloride     | AH-5183 hydrochloride                                                                                                                      | Cholinergic          |        | Inhibitor  | ACh storage      |                     |                    | Bahr, et al., Demonstration of a receptor in Torpedo synaptic vesicles for the acetylcholine storage blocker L-trans-2-(4-phenyl-[24-3H]-piperidino)cyclohexanol. Proc. Natl. Acad. Sci. USA 83, 2267 (1986)                                           |
| 16       | C10           | W-108  |             | 538.65                | WAY-100635 maleate              | N-[2-[4-(2-Methoxyphenyl)-1-piperazinyl]ethyl]-N-2-pyridinyl-cyclohexanecarboxamide maleate                                                | Serotonin            |        | Antagonist | 5-HT1A           | Yes                 | 25 mg/ml           | Forster, E.A., A pharmacological profile of the selective silent 5-HT1A receptor antagonist WAY-100635 Eur. J. Pharmacol. 281, 81 (1995)                                                                                                               |
| 16       | C11           | Y-102  | 170632-47-0 | 304.35                | YC-1                            | 3-(5'-Hydroxymethyl-2'-furyl)-1-benzyl indazole                                                                                            | Cyclic Nucleotides   | Enzyme | Activator  | Guanylyl cyclase | Insoluble           |                    | Ko, F. et al., YC-1, a novel activator of platelet guanylate cyclase. Blood 84, 4226-4233 (1994)                                                                                                                                                       |
| 16       | D02           | T 7665 | 126433-07-6 | 268.23                | Tyrphostin 51                   | 2-Amino-1,1,3-tricyano-4-(3',4',5'-trihydroxyphenyl)butadiene                                                                              | Phosphorylation      | Enzyme | Inhibitor  | EGFR             |                     |                    | Nowak, F., et al., Biochem Pharmacol. 1997 Feb 7;53(3):287-98                                                                                                                                                                                          |
| 16       | D03           | T 8516 | 440-17-5    | 480.43                | Trifluoperazine dihydrochloride |                                                                                                                                            | Dopamine             |        | Antagonist | D1/D2            |                     |                    | Mach, R.L., et al., Ca2+-calmodulin antagonists interfere with xylanase formation and secretion in Trichoderma reesei Biochim. Biophys. Acta 1403, 281-289 (1998)                                                                                      |
| 16       | D04           | T-101  | 64603-91-4  | 176.60                | THIP hydrochloride              | Gaboxadol hydrochloride                                                                                                                    | GABA                 |        | Agonist    | GABA-A           | Yes                 | 20 mg/ml           | Krogsgaard-Larsen, et al., 4,5,6,7-Tetrahydroisothiazolo[5,4-c]pyridin-3-ol and related analogues of THIP. Synthesis and biological activity. J. Med. Chem. 26, 895-900 (1983)                                                                         |
| 16       | D05           | T-165  | 37686-84-3  | 340.47                | R(+)-Terguride                  | R(+)-N,N-Diethyl-N'[(8alpha)-6-methylergolin-8-yl]urea                                                                                     | Dopamine             |        | Agonist    |                  | Insoluble           |                    | Akai, et al., Effects of terguride, a partial D2 agonist, on MPTP-lesioned parkinsonian cynomolgus monkeys. Ann. Neurol. 33, 507 (1993)                                                                                                                |
| 16       | D06           | U 6756 | 112648-68-7 | 464.65                | U-73122                         | 1-[6-[[[(17beta)-3-Methoxyestra-1,3,5(10)-trien-17-yl]amino]hexyl]-1H-pyrrole-2,5-dione                                                    | Lipid                | Enzyme | Inhibitor  | PLC, A2          |                     |                    | Bleasdale, et al., Selective inhibition of receptor-coupled phospholipase C-dependent processes in human platelets and polymorphonuclear neutrophils. J. Pharmacol. Exp. Ther. 255, 756 (1990)                                                         |
| 16       | D07           | U-108  | 127126-21-0 | 301.84                | S(-)-UH-301 hydrochloride       | S(-)-5-Fluoro-8-hydroxy-DPAT hydrochloride                                                                                                 | Serotonin            |        | Antagonist | 5-HT1A           | Slightly Soluble    |                    | Björk, L., et al., Pharmacology of the novel 5-hydroxytryptamine 1A receptor antagonist (S)-5-fluoro-8-hydroxy-2-(dipropylamino)tetralin: Inhibitor of (R)-8-Hydroxy-2-(dipropylamino)tetralin-induced effects J. Pharmacol. Exp. Ther. 258, 58 (1991) |
| 16       | D08           | V 4629 | 152-11-4    | 491.08                | (±)-Verapamil hydrochloride     |                                                                                                                                            | Ca2+ Channel         |        | Modulator  | L-type           | Yes                 | 50 mg/ml           | Fleckenstein, A., Specific pharmacology of calcium in myocardium, cardiac pacemakers, and vascular smooth muscle. Annu. Rev. Pharmacol. 17, 149 (1977)                                                                                                 |
| 16       | D09           | X 3628 |             | 366.74                | XK469                           | 2-(4-((7-Chloro-2-quinoxalinyloxy)phenoxy)propionic acid                                                                                   | Apoptosis            | Enzyme | Inhibitor  | Topoll beta      |                     |                    | Gao, H., et al., XK469, a selective topoisomerase IIbpoison. Proc. Natl. Acad. Sci. USA 96, 12168-12173 (1999)                                                                                                                                         |

| Rack No. | Rack Position | CATNUM | CAS number  | Mol. Weight Structure | Name                                          | Secondary Name                                                                                                                   | Class              | Enzyme | Action     | Selectivity | Solubility in Water | Solubility in DMSO | Reference                                                                                                                                                                                                       |
|----------|---------------|--------|-------------|-----------------------|-----------------------------------------------|----------------------------------------------------------------------------------------------------------------------------------|--------------------|--------|------------|-------------|---------------------|--------------------|-----------------------------------------------------------------------------------------------------------------------------------------------------------------------------------------------------------------|
| 16       | D10           | W-110  |             | 325.06                | S-5-Iodowillardiine                           | (S)-alpha-Amino-3,4-dihydro-5-iodo-2,4-dioxo-1(2H)-pyrimidinepropanoic acid                                                      | Glutamate          |        | Agonist    | AMPA        | Yes                 | 0.4 mg/ml          | Wong, L.A., et al., Willardiines differentiate agonist binding sites for kainate versus AMPA-preferring glutamate receptors in DRG and hippocampal neurons. J. Neurosci. 14, 3881 (1994)                        |
| 16       | D11           | Z 0878 | 37762-06-4  | 271.28                | Zaprinast                                     | 1,4-Dihydro-5-(2-propoxyphenyl)-7H-1,2,3-triazolo[4,5-d]pyrimidin-7-one                                                          | Cyclic Nucleotides | Enzyme | Inhibitor  | PDE V       | Insoluble           |                    | Santschi, L., et al., Chemically induced, activity-independent LTD elicited by simultaneous activation of PKG and inhibition of PKA. J. Neurophysiol. 82, 1577-1589 (1999)                                      |
| 16       | E02           | T 7692 | 212500-03-3 | 665.68                | T-1032                                        | Methyl (2-(4-aminophenyl)-1,2-dihydro-1-oxo-7-(2-pyridinylmethoxy)-4-(3,4,5-trimethoxyphenyl)-3-isoquinoline carboxylate sulfate | Cyclic Nucleotides | Enzyme | Inhibitor  | PDE V       | Insoluble           |                    | Noto, T., et al., Potentiation of penile tumescence by T-1032 a new potent and specific phosphodiesterase type V inhibitor in dogs. J. Pharmacol. Exp. Ther. 294, 870 (2000)                                    |
| 16       | E03           | T 8543 | 83373-60-8  | 266.47                | D-609 potassium                               | Carbonodithioic acid, O-(octahydro-4,7-methano-1H-inden-5-yl) ester potassium                                                    | Lipid              | Enzyme | Inhibitor  | PIPLC       | Yes                 | 300 mg/ml          | Mellert, W., et al., Inhibition of HIV-1 replication by an antiviral xanthate compoundin vitro. AIDS Res. Hum. Retroviruses 4, 71 (1988)                                                                        |
| 16       | E04           | T-103  | 2062-77-3   | 445.89                | Trifluoperidol hydrochloride                  | R 2498 hydrochloride; Triperidol hydrochloride                                                                                   | Dopamine           |        | Antagonist | D1/D2       | Yes                 |                    |                                                                                                                                                                                                                 |
| 16       | E05           | T-173  |             | 191.25                | Thiocitrulline                                | N5-(Aminothioxomethyl)-L-ornithine                                                                                               | Nitric Oxide       | Enzyme | Inhibitor  | nNOS, eNOS  |                     |                    |                                                                                                                                                                                                                 |
| 16       | E06           | S 5317 | 104076-39-3 | 613.69                | SKF 95282 dimaleate                           | N-[3-[3-(1-piperidinylmethyl)phenoxy]propyl]-2-benzothiazolamine dimaleate, Zolantidine                                          | Histamine          |        | Antagonist | H2          | Yes                 | 12 mg/ml           | Zawilska, J.B., et al., J. Neurochem. 81, 935-946 (2002)                                                                                                                                                        |
| 16       | E07           | U-109  | 127126-18-5 | 301.84                | R(+)-UH-301 hydrochloride                     | R(+)-5-Fluoro-8-hydroxy-DPAT hydrochloride                                                                                       | Serotonin          |        | Agonist    | 5-HT1A      | Slightly Soluble    |                    | Minabe, et al., Effects produced by acute and chronic treatment with granisetron alone or in combination with haloperidol on midbrain dopamine neurons. Eur. Neuropsychopharmacol. 2, 127 (1992)                |
| 16       | E08           | V 5888 |             | 371.40                | VUF 5574                                      | N-(2-methoxyphenyl)-N'-[2-(3-pyridinyl)-4-quinazolyl]-urea                                                                       | Adenosine          |        | Antagonist | A3          | Insoluble           |                    | van Muijlwijk-Koezen, J. Med. Chem. 43, 2227 (2000)                                                                                                                                                             |
| 16       | E09           | W 1628 | 19545-26-7  | 428.44                | Wortmannin from Penicillium funiculosum       |                                                                                                                                  | Phosphorylation    | Enzyme | Inhibitor  | PI3K        |                     |                    | Nakanishi, S., Wortmann a microbial product inhibitor of myosin light chain kinase. J. Biol. Chem. 267, 2157 (1992)                                                                                             |
| 16       | E10           | X 1251 | 23076-35-9  | 256.80                | Xylazine hydrochloride                        | N-(2,6-Dimethylphenyl)-5,6-dihydro-4H-1,3-thiazin-2-amine hydrochloride                                                          | Adrenoceptor       |        | Agonist    | alpha2      |                     |                    | Cabral, A.D., et al., Central alpha2-receptor mechanisms contribute to enhanced renal responses during ketamine-xylazine anesthesia. Am. J. Physiol. 275, R1867-R1874 (1998)                                    |
| 16       | E11           | Z 2001 |             | 234.21                | Zonisamide sodium                             | 1,2-Benzisoxazole-3-methanesulfonamide                                                                                           | Anticonvulsant     |        |            |             | Slightly Soluble    |                    | Noda, Y., et al., Zonisamide inhibits nitric oxide synthase activity induced by N-methyl-D-aspartate and buthionine sulfoximine in the rat hippocampus. Res. Commun. Mol. Pathol. Pharmacol. 105, 23 (1999)     |
| 16       | F02           | T 7697 |             | 437.19                | I-OMe-Tyrphostin AG 538                       | alpha-Cyano-(3-methoxy-4-hydroxy-5-iodocinnamoyl)-(3',4'-dihydroxyphenyl)ketone                                                  | Phosphorylation    | Enzyme | Inhibitor  | IGF-1 RTK   |                     |                    | Blum, G., et al., Substrate competitive inhibitors of IGF-1 receptor kinase. Biochemistry 39, 15705 (2000)                                                                                                      |
| 16       | F03           | T 9025 | 130-61-0    | 407.04                | Thioridazine hydrochloride                    |                                                                                                                                  | Dopamine           |        | Antagonist | D1/D2       |                     |                    | Ashkenazy-Shahar, et al., Effects of Ca(2+)-ionophore A23187 and calmodulin antagonists on regulatory mechanisms of glycolysis and cell viability of NIH-3T3 fibroblasts. Mol. Genet. Metab. 67, 334-342 (1999) |
| 16       | F04           | T-104  | 89565-68-4  | 320.82                | 3-Tropanyl-indole-3-carboxylate hydrochloride | ICS-205,930; Navoban; Tropicsetron                                                                                               | Serotonin          |        | Antagonist | 5-HT3       | Yes                 | 3.1 mg/ml          | Yoshida, et al., Effects of 5-hydroxytryptamine 3 receptor antagonists on gastrointestinal motor activity in conscious dogs. J. Pharmacol. Exp. Ther. 256, 272 (1991)                                           |
| 16       | F05           | T-182  | 10537-47-0  | 282.39                | Tyrphostin A9                                 | [[3,5-bis(1,1-Dimethylethyl)-4-hydroxyphenyl]methylene]propanedinitrile                                                          | Phosphorylation    | Enzyme | Inhibitor  | PDGFR       | Insoluble           |                    | Levitzki, A., Gilon, C, Tyrphostins as molecular tools and potential antiproliferative drugs Trends Pharmacol. Sci. 12, 171-174 (1991)                                                                          |

| Rack No. | Rack Position | CATNUM | CAS number  | Mol. Weight Structure | Name                                                  | Secondary Name                                                                                             | Class                 | Enzyme | Action     | Selectivity                            | Solubility in Water | Solubility in DMSO    | Reference                                                                                                                                                                                                   |
|----------|---------------|--------|-------------|-----------------------|-------------------------------------------------------|------------------------------------------------------------------------------------------------------------|-----------------------|--------|------------|----------------------------------------|---------------------|-----------------------|-------------------------------------------------------------------------------------------------------------------------------------------------------------------------------------------------------------|
| 16       | F06           | U 7500 | 104-98-3    | 138.13                | 4-Imidazoleacrylic acid                               | Urocanic acid                                                                                              | Histamine             | Enzyme | Inhibitor  | Histidine ammonia-lyase/ decarboxylase |                     |                       | Scott, I.R., Biochem J. 1981 Mar 15;194(3):829-38                                                                                                                                                           |
| 16       | F07           | U-110  | 107902-84-1 | 405.80                | (+)-trans-(1R,2R)-U-50488 hydrochloride               | trans-(1R,2R)-3,4-Dichloro-N-methyl-N-[2-(1-pyrrolidinyl)cyclohexyl]-benzeneacetamide hydrochloride        | Opioid                |        | Agonist    | kappa                                  | Yes                 | 11 mg/ml              | McFazdean,kopioid receptor activation depresses excitatory synaptic input to rat locus ceruleus neurons in vitro. Neuroscience 20, 231 (1987)                                                               |
| 16       | F08           | V 6383 | 42971-09-5  | 350.46                | Vinpocetine                                           | Eburnamenine-14-carboxylic acid ethyl ester; (3alpha, 16alpha)-Eburnamenine-14-carboxylic acid ethyl ester | Cyclic Nucleotides    | Enzyme | Inhibitor  | PDE I                                  | Insoluble           |                       | Han, et al., The calcium/calmodulin-dependent phosphodiesterase PDE1C down-regulates glucose-induced insulin secretion. J. Biol. Chem. 274, 22337-22344 (1999)                                              |
| 16       | F09           | W 4262 | 180001-34-7 | 250.17                | 1400W dihydrochloride                                 |                                                                                                            | Nitric Oxide          | Enzyme | Inhibitor  | iNOS                                   |                     |                       | Garvey, E.P., et al., J. Biol. Chem. 272, 4959 (1997)                                                                                                                                                       |
| 16       | F10           | X 3253 |             | 794.86                | Xamoterol hemifumarate                                | ICI 118587: (+/-)-N-[2-[[Hydroxy-3-(4-hydroxy)propyl]amino]ethyl-4-morpholinecarboxamide hemifumarate      | Adrenoceptor          |        | Agonist    | beta1                                  | Yes                 | 10 mg/ml @ 60°C       | Wabana, H. et al., J. Pharmacol. Exp. Ther. 289, 48-53 (1999)                                                                                                                                               |
| 16       | F11           | Z 3003 | 101975-10-4 | 268.22                | Zardaverine                                           | 6-(4-Difluoromethoxy-3-methoxyphenyl)-3(2H)-pyridazinone                                                   | Cyclic Nucleotides    | Enzyme | Inhibitor  | PDE III/ PDE IV                        |                     |                       | Underwood, D.C., et al., J. Pharmacol. Exp. Ther. 270, 250 (1994)                                                                                                                                           |
| 16       | G02           | T 7822 | 133550-18-2 | 297.27                | Tyrphostin AG 538                                     | (alphaE)-alpha-[(3,4-Dihydroxyphenyl)methylene]-3,4-dihydroxy-beta-oxo-benzenepropanenitrile               | Phosphorylation       | Enzyme | Inhibitor  | IGF-1 RTK                              |                     |                       | Blum, G., et al., Substrate competitive inhibitors of IGF-1 receptor kinase. Biochemistry 39, 15705 (2000)                                                                                                  |
| 16       | G03           | T 9033 | 67526-95-8  | 650.77                | Thapsigargin                                          |                                                                                                            | Intracellular Calcium | Enzyme | Releaser   |                                        |                     |                       | Treiman, M., et al., A tool coming of age: thapsigargin as an inhibitor of sarco-endoplasmic reticulum Ca2+-ATPases. Trends Pharmacol. Sci. 19, 131-135 (1998)                                              |
| 16       | G04           | T-112  | 41094-88-6  | 304.40                | Tracazolate                                           | 4-(Butylamino)-1-ethyl-6-methyl-1H-pyrazolo [3,4-b]pyridine-5-carboxylic acid ethyl ester                  | GABA                  |        | Modulator  |                                        | Slightly Soluble    |                       | Patel, et al., Pharmacological properties of tracazolate: A new non-benzodiazepine anxiolytic agent Eur. J. Pharmacol. 78, 323 (1982)                                                                       |
| 16       | G05           | T-200  |             | 161.14                | TPMPA                                                 | (1,2,5,6-Tetrahydro-pyridine-4-yl)methylphosphinic acid                                                    | GABA                  |        | Antagonist | GABA-C                                 | Yes                 | 16 mg/ml              | Murata, Y., et al., The first selective antagonist for a GABACreceptor. Bioorg. Med. Chem. Lett. 6, 2073-2076 (1996)                                                                                        |
| 16       | G06           | U-100  | 64887-14-5  | 423.95                | Urapidil hydrochloride                                | 6[[3-[4-(o-Methoxyphenyl)-1-piperazinyl]propyl]amino]-1,3-dimethyluracil hydrochloride                     | Adrenoceptor          |        | Antagonist | alpha1                                 | Yes                 |                       | Sanders, K.H., et al., Interaction of urapidil with brain serotonin-1A receptors increases the blood pressure reduction due to peripheral-adrenoceptor inhibition. J. Hypertens. (Suppl.) 6, S65-S68 (1988) |
| 16       | G07           | U-111  | 133162-85-3 | 405.80                | (-)-trans-(1S,2S)-U-50488 hydrochloride               | trans-(1S,2S)-3,4-Dichloro-N-methyl-N-[2-(1-pyrrolidinyl)cyclohexyl]benzeneacetamide hydrochloride         | Opioid                |        | Agonist    | kappa                                  | Yes                 | 13 mg/ml              | Taub, et al., Immunomodulatory activity of a non-selective opioid agonist Proc. Natl. Acad. Sci. USA 88, 360 (1991)                                                                                         |
| 16       | G08           | V 8138 | 1404-93-9   | 1485.75               | Vancomycin hydrochloride from Streptomyces orientalis | Cancocin hydrochloride                                                                                     | Antibiotic            |        |            | Cell wall synthesis                    |                     |                       |                                                                                                                                                                                                             |
| 16       | G09           | W 4761 |             | 808.66                | WB 64                                                 | N,N'-Tetramethyl-bis[(1,8-naphthylimid-9-yl)propyl]-N,N'-hexane-1,6-diyl-bis-ammonium bromide              | Cholinergic           |        | Ligand     | M2                                     | Yes                 | 32 mg/ml with heating | Holzgrabe, U., Ligands for the common allosteric site of acetylcholine M2-receptors: development and application. Pharm. Acta Helv. 74, 149 (2000)                                                          |
| 16       | G10           | X 6000 | 1218-35-5   | 280.84                | Xylometazoline hydrochloride                          | 2-(4-tert-Butyl-2,6-dimethylbenzyl)-2-imidazoline hydrochloride                                            | Adrenoceptor          |        | Agonist    | alpha                                  |                     |                       | Bognar, I.T., et al., a-adrenoceptor mediated facilitation of acetylcholine release in the rat perfused heart J. Pharmacol. Exp. Ther. 254, 702 (1990)                                                      |
| 16       | G11           | Z 4900 | 43200-80-2  | 388.82                | Zopiclone                                             | Imovane                                                                                                    | Benzodiazepine        |        | Agonist    |                                        | Insoluble           |                       | Gottesmann, C., et al., Eur. J. Neurosci. 10, 409 (1998)                                                                                                                                                    |
| 16       | H02           | T 7883 | 738-70-5    | 290.32                | Trimethoprim                                          |                                                                                                            | Antibiotic            | Enzyme | Inhibitor  | Dihydrofolate reductase                |                     |                       | Schweitzer, B.I., Dihydrofolate reductase as a therapeutic target. FASEB J. 4, 2441 (1990)                                                                                                                  |
| 16       | H03           | T 9177 | 118409-62-4 | 215.17                | Tyrphostin AG 126                                     | (3-Hydroxy-4-nitrobenzylidene)malononitrile                                                                | Phosphorylation       | Enzyme | Inhibitor  | TNFalpha                               |                     |                       | Novogrodsky, A., et al., Science 264, 1319 (1994)                                                                                                                                                           |

| Rack No. | Rack Position | CATNUM | CAS number  | Mol. Weight Structure | Name                                      | Secondary Name                                                                                                            | Class        | Enzyme | Action     | Selectivity  | Solubility in Water | Solubility in DMSO | Reference                                                                                                                                                              |
|----------|---------------|--------|-------------|-----------------------|-------------------------------------------|---------------------------------------------------------------------------------------------------------------------------|--------------|--------|------------|--------------|---------------------|--------------------|------------------------------------------------------------------------------------------------------------------------------------------------------------------------|
| 16       | H04           | T-113  | 89565-68-4  | 426.30                | 3-Tropanylindole-3-carboxylate methiodide |                                                                                                                           | Serotonin    |        | Antagonist | 5-HT3        | Yes                 |                    | Walling, K.J., et al., [3H]Quarternized ICS 205-930 labels 5-HT receptor binding sites in rat brain Eur. J. Pharmacol. 149, 397-398 (1988)                             |
| 16       | H05           | U 1508 | 119477-85-9 | 361.53                | U-75302                                   | 6-[6-(3-Hydroxy-1E,5Z-undecadienyl)-2-pyridinyl]-1,5-hexanediol                                                           | Leukotriene  | Enzyme | Agonist    | BLT1         |                     |                    | Wang, S., et al., A novel hepatointestinal leukotriene B4 receptor. Cloning and functional characterization. J. Biol. Chem. 275, 40686-40694 (2000)                    |
| 16       | H06           | U-101  | 34661-85-3  | 401.51                | Urapidil, 5-Methyl-                       | 5-Methyl-6[[3-[4-(o-Methoxyphenyl)-1-piperazinyl]propyl]amino]-1,3-dimethyluracil                                         | Adrenoceptor |        | Antagonist | alpha1A      | Yes                 | 0.4 mg/ml          | Gross, G., et al., 5-Methyl-urapidil discriminates between subtypes of the alpha1-adrenoceptor Eur. J. Pharmacol. 151, 333-335 (1988)                                  |
| 16       | H07           | U-115  |             | 455.56                | U-101958 maleate                          | 1-Benzyl-4-aminomethyl-N-[(3'-isopropoxy)-2'-pyridinyl]piperidine maleate                                                 | Dopamine     |        | Antagonist | D4           | Yes                 | 3.0 mg/ml          | Schlachter, S.K., Substituted aminopiperidines as selective and potent D4-dopamine receptor antagonists Soc. Neurosci. Abstr. 21, 253 (1995)                           |
| 16       | H08           | V 8261 | 60643-86-9  | 129.16                | (±)-gamma-Vinyl GABA                      | Vigabatrin                                                                                                                | GABA         | Enzyme | Inhibitor  | Transaminase |                     |                    | Fisher, R.S., Brain Res. Rev. 14, 245 (1989)                                                                                                                           |
| 16       | H09           | W-102  | 131543-23-2 | 522.63                | (R)-(+)-WIN 55,212-2 mesylate             | (R)-(+)-[2,3-Dihydro-5-methyl-3[(morpholinyl)methyl]pyrrolo[1,2,3-de]-1,4-benzoxazinyl]-1-naphthalenyl)methanone mesylate | Cannabinoid  |        | Agonist    |              | Insoluble           |                    | Richter, et al., (+)-WIN 55,212-2, a novel cannabinoid receptor agonist exerts antidystonic effects in mutant dystonic hamsters Eur. J. Pharmacol. 264, 371-377 (1994) |
| 16       | H10           | X-103  |             | 428.50                | Xanthine amine congener                   | 8-[4-[[[(2-Aminoethyl)amino]carbonyl]methyl]oxy]phenyl]-1,3-dipropylxanthine                                              | Adenosine    |        | Antagonist | A1           |                     |                    | Morgan, P.F., et al., Life Sci. 1989;45(8):719-28                                                                                                                      |
| 16       | H11           | Z-101  | 61129-30-4  | 390.15                | Zimelidine dihydrochloride                | (Z)-3-(4-Bromophenyl)-N,N-dimethyl-3-(3-pyridinyl)-2-propen-1-amine dihydrochloride                                       | Serotonin    |        | Inhibitor  | Reuptake     | Yes                 | 66 mg/ml           | Fuller, R.W., Serotonin uptake inhibitors: uses in clinical therapy and in laboratory research. Prog. Drug. Res. 45, 167-204 (1995)                                    |
