# Supplementary material
Source: PubMed Central journal article supplement (PMC2721788)
Supplement: blood-2009-03-211771_2.pdf [file blood-2009-03-211771_2.pdf]

| Name                                                 | Secondary Name                                                                                                             | Class                 | Enzyme | Action     | Selectivity                               | Lethality (NF) |
|------------------------------------------------------|----------------------------------------------------------------------------------------------------------------------------|-----------------------|--------|------------|-------------------------------------------|----------------|
| Nicosamide                                           | 2',5'-Dichloro-4'-nitrosalicylanilide                                                                                      | Antibiotic            |        |            | Protonophore                              | 32             |
| beta-Lapachone                                       |                                                                                                                            | Apoptosis             |        | Activator  |                                           | 32             |
| Z-L-Phe chloromethyl ketone                          | N-Carbobenzyloxy-L-phenylalanyl chloromethyl ketone; ZPCK                                                                  | Biochemistry          | Enzyme | Inhibitor  | Chymotrypsin A-gamma                      | 32             |
| (R)-(+)-WIN 55,212-2 mesylate                        | (R)-(+)-[2,3-Dihydro-5-methyl-3[(morpholinyl)methyl]pyrrolo[1,2,3-de]-1,4-benzoxazinyl]-(1-naphthalenyl)methanone mesylate | Cannabinoid           |        | Agonist    |                                           | 32             |
| Bay 11-7085                                          | (E)-3-(4-t-Butylphenylsulfonyl)-2-propenenitrile                                                                           | Cell Cycle            |        | Inhibitor  | IkB-alpha                                 | 32             |
| Rotenone                                             |                                                                                                                            | Cell Stress           |        | Modulator  | Mitochondria                              | 32             |
| 2-(alpha-Naphthoyl)ethyltrimethyl ammonium iodide    | alpha-NETA                                                                                                                 | Cholinergic           | Enzyme | Inhibitor  | Choline Acetyltransferase                 | 32             |
| 5-Nitro-2-(3-phenylpropylamino)benzoic acid          | NPPB                                                                                                                       | Cl- Channel           |        | Blocker    |                                           | 32             |
| Brefeldin A from Penicillium brefeldianum            | BFA; Ascotoxin, Cyanein                                                                                                    | Cytoskeleton and ECM  |        | Inhibitor  | Golgi apparatus                           | 33/34          |
| Fluspirilene                                         | R 6218                                                                                                                     | Dopamine              |        | Antagonist | D2/D1                                     | 32             |
| Farnesylthiosalicylic acid                           | FTS                                                                                                                        | G protein             | Enzyme | Antagonist | Ras                                       | 32             |
| Calcimycin                                           | A23187; Calcium ionophore A23187                                                                                           | Intracellular Calcium |        |            | Ca2+                                      | 32             |
| Thapsigargin                                         |                                                                                                                            | Intracellular Calcium | Enzyme | Releaser   |                                           | 32             |
| Sanguinarine chloride                                | 13-Methyl-[1,3]benzodioxolo[5,6-c]-1,3-dioxolo[4,5-i]phenanthridinium chloride                                             | Ion Pump              |        | Inhibitor  | Na+/K+ ATPase                             | 32             |
| Ebselen                                              | 2-Phenyl-1,2-benziselenazol-3(2H)-one                                                                                      | Leukotriene           | Enzyme | Inhibitor  | Lipoxygenases / glutathione S-transferase | 32             |
| SR 2640                                              | 2-[[3-(2-Quinolinylmethoxy)phenyl]amino]-benzoic acid; QMPB                                                                | Leukotriene           |        | Antagonist | CysLT1                                    | 32             |
| D-609 potassium                                      | Carbonodithioic acid, O-(octahydro-4,7-methano-1H-inden-5-yl) ester potassium                                              | Lipid                 | Enzyme | Inhibitor  | PIPLC                                     | 33/34          |
| MJ33                                                 | 1-Hexadecyl-3-(trifluoroethyl)-sn-glycero-2-phosphomethanol lithium                                                        | Lipid                 | Enzyme | Inhibitor  | PLA2                                      | 32             |
| Ro 41-0960                                           | 2'-Fluoro-3,4-dihydroxy-5-nitrobenzophenone                                                                                | Neurotransmission     | Enzyme | Inhibitor  | COMT                                      | 33/34          |
| Cantharidic Acid                                     |                                                                                                                            | Phosphorylation       | Enzyme | Inhibitor  | PP1 / PP2A                                | 32             |
| Cantharidin                                          | Cantharidine                                                                                                               | Phosphorylation       | Enzyme | Inhibitor  | PP2A                                      | 32             |
| Dequalinium analog, C-14 linker                      | C14 Linker; DECA-14; Quinolinium                                                                                           | Phosphorylation       | Enzyme | Inhibitor  | PKC-alpha                                 | 32             |
| Palmitoyl-DL-Carnitine chloride                      |                                                                                                                            | Phosphorylation       | Enzyme | Modulator  | PKC                                       | 32             |
| Phorbol 12-myristate 13-acetate                      | PMA                                                                                                                        | Phosphorylation       | Enzyme | Activator  | PKC                                       | 32             |
| rac-2-Ethoxy-3-hexadecanamido-1-propylphosphocholine |                                                                                                                            | Phosphorylation       | Enzyme | Inhibitor  | PKC                                       | 32             |
| rac-2-Ethoxy-3-octadecanamido-1-propylphosphocholine |                                                                                                                            | Phosphorylation       | Enzyme | Inhibitor  | PKC                                       | 32             |
| Rottlerin                                            | Mallotoxin                                                                                                                 | Phosphorylation       | Enzyme | Inhibitor  | PKC / CaM Kinase III                      | 32             |
| Tyrphostin A9                                        | [[3,5-bis(1,1-Dimethylethyl)-4-hydroxyphenyl]methylene]-propanedinitrile                                                   | Phosphorylation       | Enzyme | Inhibitor  | PDGFR                                     | 32             |
| Tyrphostin AG 879                                    | alpha-cyano-(3,5-di-t-butyl-4-hydroxy)thiocinnamide                                                                        | Phosphorylation       | Enzyme | Inhibitor  | TrkA                                      | 32             |
| Wortmannin from Penicillium funiculosum              |                                                                                                                            | Phosphorylation       | Enzyme | Inhibitor  | PI3K                                      | 33/34          |
| L-655,240                                            | 3-[1-(4-Chlorobenzyl)-5-fluoro-3-methyl-indol-2-yl]-2,2-dimethyl propanoic acid                                            | Thromboxane           |        | Antagonist | TXA2                                      | 32             |
| GW7647                                               | 2-(4-(2-(1-Cyclohexanebutyl)-3-cyclohexylureido)ethyl)phenyl thio)-2-methylpropionic acid                                  | Transcription         |        | Agonist    | PPAR-alpha                                | 32             |
