# Supplementary material
Source: PubMed Central journal article supplement (PMC2721788)
Supplement: blood-2009-03-211771_3.pdf [file blood-2009-03-211771_3.pdf]

| Name                                          | Secondary Name                                                                                                            | Class                 | Enzyme | Action     | Selectivity | Lethality (NF) |
|-----------------------------------------------|---------------------------------------------------------------------------------------------------------------------------|-----------------------|--------|------------|-------------|----------------|
| FPL 64176                                     | 2,5-Dimethyl-4-[2-(phenylmethyl)benzoyl]-1H-pyrrole-3-carboxylic acid methyl ester                                        | Ca2+ Channel          |        | Activator  | L-type      | 40             |
| Nitrendipine                                  | 1,4-Dihydro-2,6-dimethyl-4-(3-nitrophenyl)-3,5-pyridinecarboxylic acid ethyl methyl ester                                 | Ca2+ Channel          |        | Antagonist | L-type      | 45             |
| TG003                                         | (Z)-1-(3-Ethyl-5-methoxy-2,3-dihydrobenzothiazol-2-ylidene)-propan-2-one                                                  | Cell Cycle            | Enzyme | Inhibitor  | Clk         | 40             |
| Ivermectin                                    | MK-933                                                                                                                    | Cholinergic           |        | Modulator  | alpha7 nACh | 41/42          |
| Loratadine                                    | 4-(8-chloro-5,6-dihydro-11H-benzo[5,6]cyclohepta[1,2-b]pyridin-11-ylidene-1-piperidinecarboxylic acid ethyl ester         | Histamine             |        | Antagonist | H1          | 45             |
| (R,R)-cis-Diethyl tetrahydro-2,8-chrysenediol | (5R, 11R)-5,11-Diethyl-5,6,11,12-tetrahydro-2,8-chrysenediol                                                              | Hormone               |        | Antagonist | ER-beta     | 41             |
| Calmidazolium chloride                        | R 24571 chloride                                                                                                          | Intracellular Calcium | Enzyme | Inhibitor  | Ca2+ATPase  | 37/38          |
| MK-886                                        | 3-[3-tert-Butylthio-1-(4-chlorobenzyl)-5-isopropyl-1H-indol-2-yl]-2,2-dimethylpropionic acid, sodium salt                 | Leukotriene           |        | Inhibitor  |             | 39             |
| ET-18-OCH3                                    | 3,5,9-Trioxa-4-phosphaheptacosan-1-aminium                                                                                | Lipid                 | Enzyme | Inhibitor  | PIPLC       | 37/38          |
| L-162,313                                     | (5,7-dimethyl-2-ethyl-3-[[4-[2-(n-butylloxycarbonylsulfonamido)-5-isobutyl-3-thienyl]phenyl]methyl]imidazo[4,5,6]pyridine | Neurotransmission     |        | Agonist    | AT1         | 45             |
| N-Oleoyldopamine                              | OLDA                                                                                                                      | Neurotransmission     |        | Ligand     | CB1         | 41             |
| DL-Stearoylcarnitine chloride                 |                                                                                                                           | Phosphorylation       | Enzyme | Inhibitor  | PKC         | 41             |
| Indirubin-3'-oxime                            | Indirubin-3'-monoxime                                                                                                     | Phosphorylation       | Enzyme | Inhibitor  | CDK         | 45             |
| NSC 95397                                     | 2,3-bis[(2-Hydroxyethyl)thio]-1,4-naphthoquinone                                                                          | Phosphorylation       | Enzyme | Inhibitor  | Cdc25       | 40             |
| Purvalanol A                                  | NG-60                                                                                                                     | Phosphorylation       | Enzyme | Inhibitor  | CDK         | 41/42          |
| SP600125                                      | Anthrapyrazolone; 1,9-Pyrazoloanthrone                                                                                    | Phosphorylation       | Enzyme | Inhibitor  | c-JNK       | 41             |
| SU 5416                                       | 1,3-Dihydro-3-[(3,5-dimethyl-1H-pyrrol-2-yl)methylene]-2H-indol-2-one                                                     | Phosphorylation       |        | Inhibitor  | VEGFR PTK   | 37/38          |
| (±)-Ibuprofen                                 | alpha-Methyl-4-(isobutyl)phenylacetic acid                                                                                | Prostaglandin         | Enzyme | Inhibitor  | COX         | 45             |
