# Supplementary material
Source: PubMed Central journal article supplement (PMC2721788)
Supplement: blood-2009-03-211771_4.pdf [file blood-2009-03-211771_4.pdf]

| Name                                               | Secondary Name                                                                                                                        | Class                | Enzyme | Action     | Selectivity            | Onset (NF) | Lethality (NF) |
|----------------------------------------------------|---------------------------------------------------------------------------------------------------------------------------------------|----------------------|--------|------------|------------------------|------------|----------------|
| 1,3-Diethyl-8-phenylxanthine                       | DPX                                                                                                                                   | Adenosine            |        | Antagonist | A1                     | 41/42      | 45             |
| 7-Chloro-4-hydroxy-2-phenyl-1,8-naphthyridine      |                                                                                                                                       | Adenosine            |        | Antagonist | A1                     | 39         | 39             |
| CGS-15943                                          | 9-Chloro-2-(2-furyl)[1,2,4]triazolo[1,5-c]quinazolin-5-amine                                                                          | Adenosine            |        | Antagonist | A1                     | 41/42      | 46             |
| L-765,314                                          | (2S)-4-(4-Amino-6,7-dimethoxy-2-quinazolinyl)-2-[[[(1,1-Dimethylethyl)amino]carbonyl]-1-piperazinecarboxylic acid, phenylmethyl ester | Adrenoceptor         |        | Antagonist | alpha-1B               | 41/42      | -              |
| Mevastatin                                         | Compactin                                                                                                                             | Antibiotic           | Enzyme | Inhibitor  | Ras, Rho               | 35/36      | 45             |
| 4-Amino-1,8-naphthalimide                          |                                                                                                                                       | Apoptosis            | Enzyme | Inhibitor  | PARP                   | 41/42      | -              |
| Retinoic acid                                      | Vitamin A acid                                                                                                                        | Apoptosis            | Enzyme | Activator  |                        | 39         | 40             |
| 1,10-Phenanthroline monohydrate                    | o-Phenanthroline monohydrate                                                                                                          | Biochemistry         | Enzyme | Inhibitor  | Metalloprotease        | 39/40      | 46             |
| Felodipine                                         | Plendil                                                                                                                               | Ca2+ Channel         |        | Blocker    | L-type                 | 41/42      | 45             |
| MRS 1845                                           | N-Propargylnitrendipene                                                                                                               | Ca2+ Channel         |        | Inhibitor  | SOC                    | 41/42      | 45             |
| Nicardipine hydrochloride                          | YC-93 hydrochloride                                                                                                                   | Ca2+ Channel         |        | Antagonist | L-type                 | 41/42      | 45             |
| Nifedipine                                         |                                                                                                                                       | Ca2+ Channel         |        | Antagonist | L-type                 | 41/42      | 46             |
| Nimodipine                                         | 1,4-Dihydro-2,6-dimethyl-4-(3-nitrophenyl)-3,5-pyridinecarboxylic acid 2-methoxyethyl 1-methylethyl ester                             | Ca2+ Channel         |        | Antagonist | L-type                 | 41/42      | 41/42          |
| SKF 96365                                          | 1-(beta-[3-(4-Methoxyphenyl)propoxy]-4-methoxyphenethyl)-1H-imidazole hydrochloride                                                   | Ca2+ Channel         |        | Inhibitor  |                        | 39         | 41/42          |
| (±)-alpha-Lipoic Acid                              | (±)-1,2-Dithiolane-3-pentanoic acid                                                                                                   | Cell Stress          | Enzyme | Coenzyme   | Pyruvate dehydrogenase | 39         | 45             |
| Forskolin                                          |                                                                                                                                       | Cyclic Nucleotides   | Enzyme | Activator  | Adenylate cyclase      | 39/40      | 41/42          |
| YC-1                                               | 3-(5'-Hydroxymethyl-2'-furyl)-1-benzyl indazole                                                                                       | Cyclic Nucleotides   | Enzyme | Activator  | Guanylyl cyclase       | 45         | -              |
| Zardaverine                                        | 6-(4-Difluoromethoxy-3-methoxyphenyl)-3(2H)-pyridazinone                                                                              | Cyclic Nucleotides   | Enzyme | Inhibitor  | PDE III/ PDE IV        | 39/40      | 43             |
| Nocodazole                                         | R 17934                                                                                                                               | Cytoskeleton and ECM |        | Inhibitor  | beta-tubulin           | 33/34      | 33/34          |
| Podophyllotoxin                                    |                                                                                                                                       | Cytoskeleton and ECM |        | Inhibitor  |                        | 39/40      | 41/42          |
| GBR-12909 dihydrochloride                          | 1-[2-[bis(4-Fluorophenyl)methoxy]ethyl]-4-[3-phenylpropyl]piperazine dihydrochloride                                                  | Dopamine             |        | Inhibitor  | Reuptake               | 45         | -              |
| N-(p-Isothiocyantophenethyl)piperone hydrochloride | NIPS hydrochloride                                                                                                                    | Dopamine             |        | Antagonist | D2                     | 45         | -              |
| Pimozide                                           |                                                                                                                                       | Dopamine             |        | Antagonist | D2                     | 41/42      | 45             |
| Sobuzoxane                                         | 4,4'-(1,2-Ethanediyl)bis(1-isobutoxycarbonyloxymethyl-2,6-piperazinedione)                                                            | Gene Regulation      | Enzyme | Inhibitor  | Topo II                | 41/42      | 47             |
| Riluzole                                           | 2-Amino-6-(trifluoromethoxy)-benzothiazole                                                                                            | Glutamate            |        | Antagonist | Release                | 45         | -              |
| Clemastine fumarate                                |                                                                                                                                       | Histamine            |        | Antagonist | H1                     | 45         | -              |
| 2-methoxyestradiol                                 | 2-Hydroxyestradiol 2-methyl ether                                                                                                     | Hormone              |        | Metabolite | Estrogen               | 33/34      | 33/34          |

| Name                                                                   | Secondary Name                                                                                         | Class           | Enzyme | Action     | Selectivity             | Onset (NF) | Lethality (NF) |
|------------------------------------------------------------------------|--------------------------------------------------------------------------------------------------------|-----------------|--------|------------|-------------------------|------------|----------------|
| beta-Estradiol                                                         | Dihydrofolliculin                                                                                      | Hormone         |        |            | Estrogen                | 42         | 45             |
| Dequalinium dichloride                                                 | 1,1'-Decamethylenebis(4-aminoquinadinium) dichloride                                                   | K+ Channel      |        | Blocker    |                         | 39         | 39             |
| 7-Cyclopentyl-5-(4-phenoxy)phenyl-7H-pyrrolo[2,3-d]pyrimidin-4-ylamine |                                                                                                        | Phosphorylation | Enzyme | Inhibitor  | Ick                     | 41/42      | 45             |
| Cyclosporin A                                                          | Antibiotic S 7481F1                                                                                    | Phosphorylation | Enzyme | Inhibitor  | Calcineurin phosphatase | 41/42      | -              |
| Diacylglycerol kinase inhibitor I                                      | R 59022                                                                                                | Phosphorylation | Enzyme | Inhibitor  | Diacylglycerol kinase   | 45         | -              |
| Diacylglycerol Kinase Inhibitor II                                     | R59949                                                                                                 | Phosphorylation | Enzyme | Inhibitor  | Diacylglycerol kinase   | 41/42      | -              |
| Genistein                                                              | 5,7-Dihydroxy-3-(4-hydroxyphenyl)-4H-1-benzopyran-4-one                                                | Phosphorylation | Enzyme | Inhibitor  | Tyrosine kinase         | 35/36      | 46             |
| GW2974                                                                 | N4-(1-Benzyl-1H-indazol-5-yl)-N6,N6-dimethylpyrido[3,4-d]pyrimidine-4,6-diamine                        | Phosphorylation | Enzyme | Inhibitor  | EGFR / ErbB-2           | 41/42      | 47             |
| GW5074                                                                 | 3-(3, 5-Dibromo-4-hydroxybenzylidene-5-iodo-1,3-dihydro-indol-2-one)                                   | Phosphorylation | Enzyme | Inhibitor  | Raf1 kinase             | 33/34      | 41/42          |
| IC 261                                                                 | 1,3-Dihydro-3-[(2,4,6-trimethoxyphenyl)methylene]-2H-indol-2-one                                       | Phosphorylation | Enzyme | Inhibitor  | CK-1delta/epsilon       | 35/36      | 41/42          |
| Kenpauillone                                                           | NSC 664704                                                                                             | Phosphorylation | Enzyme | Inhibitor  | CDK1, CDK2, CDK5        | 45         | -              |
| SU 4312                                                                | 3-(4-Dimethylaminobenzylidene)-2-indolinone                                                            | Phosphorylation | Enzyme | Inhibitor  | KDR                     | 45         | -              |
| SU 6656                                                                | 2,3-Dihydro-N,N-dimethyl-2-oxo-3-[(4,5,6,7-tetrahydro-1H-indol-2-yl)methylene]-1H-indole-5-sulfonamide | Phosphorylation | Enzyme | Inhibitor  | Src family kinase       | 39/40      | 46             |
| Tyrphostin AG 1478                                                     | N-(3-Chlorophenyl)-6,7-dimethoxy-4-quinazolinamine                                                     | Phosphorylation | Enzyme | Inhibitor  | EGFR                    | 45         | 46             |
| Tyrphostin AG 494                                                      | N-Phenyl-3,4-dihydroxybenzylidenecyanacetamide                                                         | Phosphorylation | Enzyme | Inhibitor  | EGFR                    | 39         | 40             |
| Meclofenamic acid sodium                                               | 2-[(2,6-Dichloro-3-methylphenyl)amino]benzoic acid sodium                                              | Prostaglandin   | Enzyme | Inhibitor  | COX / 5-Lipoxygenase    | 35/36      | 41/42          |
| Amperozide hydrochloride                                               | 4-[4,4-bis(4-Fluorophenyl)butyl]-N-ethyl-1-piperazinecarboxamide hydrochloride                         | Serotonin       |        | Ligand     |                         | 41/42      | -              |
| Ritanserin                                                             | 6-[2-[4-bis(4-Fluorophenyl)methylene]-1-piperidinyl]-ethyl]-7-methyl-5H-thiazolo[3,2-a]pyrimidin-5-one | Serotonin       |        | Antagonist | 5-HT2/5-HT1C            | 41/42      | -              |
| 13-cis-retinoic acid                                                   | Isotretinoin                                                                                           | Transcription   |        | Regulator  | RAR-alpha, beta         | 41/42      | 46             |
| 6(5H)-Phenanthridinone                                                 |                                                                                                        | Transcription   | Enzyme | Inhibitor  | PARP                    | 45         | 47             |
| TTNPB                                                                  | Arotinoid acid                                                                                         | Transcription   |        | Ligand     | RAR-alpha, beta, gamma  | 39         | 45             |
