# Supplementary material
Source: PubMed Central journal article supplement (PMC2721788)
Supplement: blood-2009-03-211771_5.pdf [file blood-2009-03-211771_5.pdf]

| Name                                    | Secondary Name                                                                         | Class        | Enzyme | Action     | Selectivity      | Phenotypes                                                          | Onset (NF) | Lethality (NF) |
|-----------------------------------------|----------------------------------------------------------------------------------------|--------------|--------|------------|------------------|---------------------------------------------------------------------|------------|----------------|
| (-)-Ephedrine hemisulfate               |                                                                                        | Adrenoceptor |        | Activator  |                  | Lack of skin pigmentation                                           | 33/34      | 41/42          |
| Nalidixic acid sodium                   | 1-Ethyl-1,4-dihydro-7-methyl-4-oxo-1,8-naphthyridine-3-carboxylic acid sodium          | Antibiotic   | Enzyme | Inhibitor  | DNA Gyrase       | Silvery-colored embryos                                             | 47         | -              |
| Caffeic acid phenethyl ester            | CAPE                                                                                   | Cell Cycle   |        | Inhibitor  | NFkB             | Lack of skin pigmentation                                           | 33/34      | 39             |
| 1-Phenyl-3-(2-thiazolyl)-2-thiourea     |                                                                                        | Dopamine     | Enzyme | Inhibitor  | beta-Hydroxylase | Reduced eye & skin pigmentation                                     | 33/34      | -              |
| Amfonelic acid                          | 7-Benzyl-1-ethyl-1,4-dihydro-4-oxo-1,8-naphthyridine-3-carboxylic acid                 | Dopamine     |        | Modulator  |                  | Reduced eye & skin pigmentation                                     | 33/34      | -              |
| Apomorphine hydrochloride hemihydrate   | 10,11-Dihydroxyaporphine hydrochloride hemihydrate                                     | Dopamine     |        | Agonist    |                  | Reduced eye & skin pigmentation                                     | 33/34      | -              |
| R(-)-N-Allylnorapomorphine hydrobromide |                                                                                        | Dopamine     |        | Agonist    |                  | Lack of skin pigmentation; Delayed embryogenesis; Paralyzed embryos | 33/34      | 40             |
| R(-)-Propylnorapomorphine hydrochloride | R(-)-NPA hydrochloride                                                                 | Dopamine     |        | Agonist    | D2               | Reduced skin pigmentation                                           | 33/34      | -              |
| Spiroxatrine                            | R 5188                                                                                 | Serotonin    |        | Agonist    | 5-HT1A           | Increased skin pigmentation                                         | 45         | -              |
| WIN 62,577                              | 17-beta-Hydroxy-17-alpha-ethynyl-delta-4-androstano(3,2-b)pyrimido(1,2-a)benzimidazole | Tachykinin   |        | Antagonist | NK1              | Reduced eye & skin pigmentation                                     | 33/34      | 42             |
