# Supplementary material
Source: PubMed Central journal article supplement (PMC2721788)
Supplement: blood-2009-03-211771_6.pdf [file blood-2009-03-211771_6.pdf]

| Name                             | Secondary Name                                                                                                | Class                 | Enzyme | Action    | Selectivity | Phenotypes                                                      | Onset (NF) | Lethality (NF) |
|----------------------------------|---------------------------------------------------------------------------------------------------------------|-----------------------|--------|-----------|-------------|-----------------------------------------------------------------|------------|----------------|
| (S)-(+)-Camptothecin             |                                                                                                               | Apoptosis             | Enzyme | Inhibitor | Topol       | Worm-like, crippled embryos; Tremoring embryos; Very small eyes | 39         | 41/42          |
| 2,3-Dimethoxy-1,4-naphthoquinone | DMNQ                                                                                                          | Cell Stress           |        | Modulator |             | Brown discoloration; Tremoring embryos                          | 41         | 42             |
| SB 205384                        | 4-Amino-7-hydroxy-2-methyl-5,6,7,8-tetrahydrobenzo[b]thieno[2,3-b]pyridine-3-carboxylic acid but-2-ynyl ester | GABA                  |        | Modulator | GABA-A      | Brown discoloration; Delayed embryogenesis                      | 40         | 46             |
| trans-Dehydroandrosterone        | 5-Androsten-3beta-ol-17-one; DHEA                                                                             | Hormone               |        |           | Aldosterone | Brown discoloration; Tremoring embryos                          | 41/42      | -              |
| 3-Aminopropionitrile fumarate    |                                                                                                               | Multi-Drug Resistance | Enzyme | Substrate | CYP450      | Swollen vacuoles in the tail's notochord                        | 46         | -              |
| Diphenyleneiodonium chloride     | [1,1'-Biphenyl]-2,2'-diiodonium chloride                                                                      | Nitric Oxide          | Enzyme | Inhibitor | eNOS        | Brown discoloration; Tremoring embryos                          | 41         | 42             |
