# Supplementary material
Source: PubMed Central journal article supplement (PMC2721788)
Supplement: blood-2009-03-211771_7.pdf [file blood-2009-03-211771_7.pdf]

| Pheno-<br>type<br>class | Compound name                                                | Pharmacological<br>class | Selectivity                 | Type of edema |                 |                  |         |                 |                 | Cardiac<br>pheno-<br>type | Lymph<br>heart<br>enlarge-<br>ment | Lethality |             |
|-------------------------|--------------------------------------------------------------|--------------------------|-----------------------------|---------------|-----------------|------------------|---------|-----------------|-----------------|---------------------------|------------------------------------|-----------|-------------|
|                         |                                                              |                          |                             | Cerebral      | Peri-<br>ocular | Peri-<br>cardial | Ventral | Procto-<br>deal | Pro-<br>nephric |                           |                                    |           | Tail<br>tip |
| A                       | 1,3-Diethyl-8-phenylxanthine<br>CGS-15943                    | Adenosine                | A1                          |               | 41/42           | 41/42            |         |                 |                 |                           |                                    | 45        |             |
|                         |                                                              | Adenosine                | A1                          |               | 41/42           | 45               |         | 45              |                 |                           |                                    | 46        |             |
|                         | Mevastatin                                                   | Antibiotic               | Ras, Rho                    |               | 35/36           | 41/42            |         |                 | §               |                           |                                    | 45        |             |
|                         | 1,10-Phenanthroline<br>monohydrate                           | Biochemistry             | Metallo-<br>protease        |               | 39/40           | 41/42            |         |                 |                 |                           |                                    | 46        |             |
|                         | Felodipine                                                   | Ca2+ Channel             | L-type                      |               | 41/42           | 41/42            |         | 41/42           |                 |                           |                                    | 45        |             |
|                         | MRS 1845                                                     | Ca2+ Channel             | SOC                         |               | 41/42           | 41/42            |         | 41/42           |                 |                           | 41/42                              | 45        |             |
|                         | Nicardipine<br>hydrochloride                                 | Ca2+ Channel             | L-type                      |               | 41/42           | 41/42            |         |                 |                 |                           |                                    | 45        |             |
|                         | Nifedipine                                                   | Ca2+ Channel             | L-type                      |               | 41/42           | 41/42            | 45      |                 |                 |                           |                                    | 46        |             |
|                         | Nimodipine                                                   | Ca2+ Channel             | L-type                      |               | 41/42           | 41/42‡           |         |                 |                 | 41/42¶                    |                                    | 41/42     |             |
|                         | SKF 96365                                                    | Ca2+ Channel             |                             |               | 39              | 40               | 40      |                 |                 |                           |                                    | 41/42     |             |
|                         | Forskolin                                                    | Cyclic<br>Nucleotides    | Adenylate<br>cyclase        |               | 39              | 39               | 39      |                 |                 |                           |                                    | 41/42     |             |
|                         | Pimozide                                                     | Dopamine                 | D2                          |               | 41/42           | 41/42            |         | 41/42           |                 | 41/42¶                    |                                    | 45        |             |
|                         | Clemastine fumarate                                          | Histamine                | H1                          |               | 46              | 46               | 45      |                 |                 |                           |                                    | -         |             |
|                         | GW2974                                                       | Phosphorylation          | EGFR /<br>ErbB2             |               | 41/42           | 41/42            | 41/42   |                 |                 |                           |                                    | 45        | 47          |
|                         | Amperozide<br>hydrochloride                                  | Serotonin                |                             |               | 45              | 41/42            | 41/42   |                 |                 |                           |                                    |           | -           |
| 6(5H)-Phenanthridinone  | Transcription                                                | PARP                     |                             | 45            | 45              | 45               |         |                 |                 |                           |                                    | 47        |             |
| B                       | L-765,314                                                    | Adrenoceptor             | alpha-1B                    |               | 41/42<br>#      | 45               |         |                 |                 |                           |                                    | -         |             |
|                         | YC-1                                                         | Cyclic<br>Nucleotides    | Guanylyl<br>cyclase         |               | 45              | 45               |         |                 |                 |                           |                                    | -         |             |
|                         | GBR-12909<br>dihydrochloride                                 | Dopamine                 | Reuptake                    |               | 45              | 45               |         | 45              |                 |                           |                                    | -         |             |
|                         | N-(p-<br>Isothiocyanatophenethyl)<br>spiperone hydrochloride | Dopamine                 | D2                          |               | 45              | 45               |         |                 |                 |                           |                                    | -         |             |
|                         | Riluzole                                                     | Glutamate                | Release                     |               | 45              | 45               |         | 45              |                 |                           |                                    | -         |             |
|                         | beta-Estradiol                                               | Hormone                  | Estrogen                    |               | 42 #            |                  |         |                 |                 |                           |                                    | 45        |             |
|                         | Cyclosporin A                                                | Phosphorylation          | Calcineurin<br>phosphatase  |               | 45              | 45               |         | 41/42           |                 |                           |                                    | -         |             |
|                         | Diacylglycerol kinase<br>inhibitor I                         | Phosphorylation          | Diacylglycerol<br>kinase    |               | 45              | 45               |         |                 |                 |                           |                                    | -         |             |
|                         | Diacylglycerol Kinase<br>Inhibitor II                        | Phosphorylation          | Diacylglycerol<br>kinase    |               | 46              | 41/42            |         | 45              |                 |                           |                                    | -         |             |
|                         | Kenpauillone                                                 | Phosphorylation          | CDK1, CDK2,<br>CDK5         |               | 45              | 45               |         |                 |                 |                           |                                    | -         |             |
|                         | SU 4312                                                      | Phosphorylation          | KDR                         |               | 45              | 45               |         | 45              |                 |                           |                                    | -         |             |
| Ritanserlin             | Serotonin                                                    | 5-HT2/5-<br>HT1C         |                             | 41/42         | 41/42           |                  | 45      |                 |                 |                           | -                                  |           |             |
| C                       | Naphthyridine                                                | Adenosine                | A1                          |               |                 | 39               |         |                 |                 |                           |                                    | 39        |             |
|                         | (±)-alpha-Lipoic Acid                                        | Cell stress              | Pyruvate de-<br>hydrogenase |               |                 | 39               |         |                 | 42              |                           |                                    | 45        |             |
|                         | Zardaverine                                                  | Cyclic<br>Nucleotides    | PDE III/PDE<br>IV           |               | 39/40           |                  |         | 41/42           |                 |                           |                                    | 43        |             |
|                         | Nocodazole                                                   | Cytoskeleton and<br>ECM  | beta-tubulin                |               | 33/34           |                  |         |                 |                 |                           |                                    | 33/34     |             |
|                         | Podophyllotoxin                                              | Cytoskeleton and<br>ECM  |                             |               | 39/40           |                  |         |                 |                 |                           |                                    | 41/42     |             |
|                         | 2-methoxyestradiol                                           | Hormone                  | Estrogen                    |               | 33/34           |                  |         |                 |                 |                           |                                    | 33/34     |             |
|                         | Dequalinium dichloride                                       | K+ Channel               |                             |               | 39              |                  |         |                 |                 |                           |                                    | 39        |             |
|                         | 7-Cyclo                                                      | Phosphorylation          | Ick                         |               | 41/42           |                  |         | 41/42           |                 |                           |                                    | 45        |             |
|                         | GW5074                                                       | Phosphorylation          | Raf1 kinase                 |               | 33/34           |                  |         |                 |                 |                           |                                    | 41/42     |             |
|                         | Meclofenamic acid<br>sodium                                  | Prostaglandin            | COX / 5-<br>Lipoxygenase    |               | 35/36           |                  |         |                 |                 |                           |                                    | 41/42     |             |
| D                       | 4-Amino-1,8-<br>naphthalimide<br>Sobuzoxane                  | Apoptosis                | PARP                        |               | 41/42*          | 41/42            |         | 47              |                 |                           |                                    | -         |             |
|                         |                                                              | Gene Regulation          | Topo II                     |               | 45*             | 45               | 45      | 41/42           |                 |                           |                                    | 47        |             |
|                         | SU 6656                                                      | Phosphorylation          | Src family<br>kinases       |               | 41/42*          | 41/42            | 39/40   | 39/40           | 39/40           |                           |                                    | 46        |             |
| E                       | Retinoic acid                                                | Apoptosis                |                             |               | 39+             |                  |         | 40              | 39              |                           |                                    | 39        |             |
|                         | 13-cis-retinoic acid                                         | Transcription            | RAR-alpha,<br>beta          |               | 45+             | 41/42            |         | 45              |                 |                           |                                    | 46        |             |
|                         | TTNPB                                                        | Transcription            | RAR-alpha,<br>beta, gamma   |               | 41/42+          | 41/42            | 41/42   | 39              |                 |                           |                                    | 45        |             |
| F                       | Genistein                                                    | Phosphorylation          | Tyrosine<br>kinase          |               |                 |                  |         |                 | 35/36           |                           |                                    | 41/42     |             |
|                         | IC 261                                                       | Phosphorylation          | CK-1                        |               | 35/36           |                  | 41/42   | 41/42           |                 | §                         |                                    | 41/42     |             |

| Pheno-<br>type<br>class | Compound name      | Pharmacological<br>class | Selectivity   | Type of edema |                 |                  |         |                 |                 |             | Cardiac<br>pheno-<br>type | Lymph<br>heart<br>enlarge-<br>ment | Lethality |
|-------------------------|--------------------|--------------------------|---------------|---------------|-----------------|------------------|---------|-----------------|-----------------|-------------|---------------------------|------------------------------------|-----------|
|                         |                    |                          |               | Cerebral      | Peri-<br>ocular | Peri-<br>cardial | Ventral | Procto-<br>deal | Pro-<br>nephric | Tail<br>tip |                           |                                    |           |
|                         |                    |                          | delta/epsilon |               |                 |                  |         |                 |                 |             |                           |                                    |           |
|                         | Tyrphostin AG 1478 | Phosphorylation          | EGFR          |               | 45              |                  | 45      |                 |                 |             | 45¶                       |                                    | 46        |
|                         | Tyrphostin AG 494  | Phosphorylation          | EGFR          |               |                 | 39               |         |                 |                 |             | §                         |                                    | 40        |

\*Periocular edema causing bulging eyes. #Bilateral periocular edemas causing narrow-set eyes. +Cerebral edema extending dorso-anteriorly and displacing the eyes. §Heart tube failed to loop. ¶The heart chambers were enlarged. ‡The edemas were also detected in the gut. Numbers shown represent embryonic stages according to Nieuwkoop and Faber (NF). Compound abbreviations: 7-Cyclo, 7-Cyclopentyl-5-(4-phenoxy)phenyl-7H-pyrrolo[2,3-d]pyrimidin-4-ylamine; Naphthyridine, 7-Chloro-4-hydroxy-2-phenyl-1,8-naphthyridine.
